# Supplementary material for: A high-resolution gene expression atlas links dedicated meristem genes to key architectural traits
Source: Genome Res. 2019 Dec;29(12):1962–73. doi: 10.1101/gr.250878.119 (PMC6886502; doi:10.1101/gr.250878.119)
Supplement: Supplemental Material [file supp_gr.250878.119_Supplemental_Tables.xlsx]

## Sheet: (S1)RNAseq metrics
RNAseq metrics
Average collected surface per replicate (μm2)	Library	Trimmed Reads	Uniquely Aligned Reads	Uniquely Aligned (%)	Genic Reads	Genic Reads (%)
1220000	Meristem_Rep1	27680448	2.4082e+07	87	2.24926e+07	93.4
	Meristem_Rep2	27983796	2.4262e+07	86.7	2.27092e+07	93.6
370000	Tip_Rep1	27858331	2.40975e+07	86.5	2.25552e+07	93.6
	Tip_Rep2	26337520	2.29136e+07	87	2.14701e+07	93.7
270000	L1_Rep1	26469148	2.27105e+07	85.8	2.12116e+07	93.4
	L1_Rep2	27740781	2.40235e+07	86.6	2.22698e+07	92.7
730000	L2_Rep1	27954358	2.40967e+07	86.2	2.25545e+07	93.6
	L2_Rep2	28839457	2.4975e+07	86.6	2.33516e+07	93.5
150000	P0_Rep1	30401292	2.62363e+07	86.3	2.45834e+07	93.7
	P0_Rep2	33821502	2.89512e+07	85.6	2.71852e+07	93.9
315000	P1_Rep1	26877070	2.35443e+07	87.6	2.22258e+07	94.4
	P1_Rep2	29138026	2.54084e+07	87.2	2.39347e+07	94.2
670000	P2_Rep1	28453919	2.47834e+07	87.1	2.32716e+07	93.9
	P2_Rep2	27751259	2.42824e+07	87.5	2.28983e+07	94.3
940000	P3_Rep1	29016261	2.52441e+07	87	2.37043e+07	93.9
	P3_Rep2	27905334	2.40544e+07	86.2	2.26111e+07	94
155000	Internode_Rep1	18927998	1.63159e+07	86.2	1.52717e+07	93.6
	Internode_Rep2	21248941	1.82103e+07	85.7	1.70085e+07	93.4
670000	Vasculature_Rep1	29533783	2.58421e+07	87.5	2.42915e+07	94
	Vasculature_Rep2	27912904	2.41447e+07	86.5	2.26718e+07	93.9

## Sheet: (S2)Expression values
Gene annotations and mean expression values (RPM)
Note: 286 genes are listed with two functional Categories
				Mean expression values (RPM)
Gene_ID	BINCODE	Category	Similarity	Meristem	Tip	L1	L2	P0	P1	P2	P3	Internode	Vasculature	Classical gene name
GRMZM2G099367	'1'	'PS'	'moderately similar to ( 278) AT5G38660 | Symbols: APE1 | APE1 (ACCLIMATION OF PHOTOSYNTHESIS TO ENVIRONMENT) | chr5:15473285-15475497 REVERSEmoderately similar to ( 329) loc_os08g27010 12008.m06714 protein APE1, putative, expressed seq=cds; coord=1:221370536..221402911:-1; parent_gene=GRMZM2G099367'	6.75	10.9	5.15	5.65	2.35	2.35	3.1	1.85	3.05	2.45
AC192204.3_FG005	'1.1.1.1'	'PS.lightreaction.photosystem II.LHC-II'	'weakly similar to ( 120) AT5G54270 | Symbols: LHCB3, LHCB3*1 | LHCB3 (LIGHT-HARVESTING CHLOROPHYLL B-BINDING PROTEIN 3); structural molecule | chr5:22038424-22039383 FORWARDweakly similar to ( 119) CB23_HORVU Chlorophyll a-b binding protein of LHCII type III, chloroplast precursor (CAB) - Hordeum vulgare (Barley)weakly similar to ( 118) loc_os07g37550 12007.m079717 protein chlorophyll a-b bindin…	0	0	0	0	0	0	0	0	0	0
AC194734.3_FG004	'1.1.1.1'	'PS.lightreaction.photosystem II.LHC-II'	'very weakly similar to (96.7) AT1G15820 | Symbols: LHCB6, CP24 | LHCB6 (LIGHT HARVESTING COMPLEX PSII SUBUNIT 6); chlorophyll binding | chr1:5446685-5447676 REVERSEvery weakly similar to (94.7) CB4_SPIOL Chlorophyll a-b binding protein CP24, chloroplast precursor - Spinacia oleracea (Spinach)weakly similar to ( 101) loc_os04g38410 12004.m08831 protein chlorophyll a-b binding protein CP24, chloro…	0	0	0	0	0	0	0	0	0	0
AC207722.2_FG009	'1.1.1.1'	'PS.lightreaction.photosystem II.LHC-II'	'moderately similar to ( 452) AT2G34420 | Symbols: LHB1B2, LHCB1.5 | LHB1B2; chlorophyll binding | chr2:14522716-14523513 REVERSEhighly similar to ( 512) CB21_MAIZE Chlorophyll a-b binding protein 1, chloroplast precursor (LHCII type I CAB-1) (LHCP) - Zea mays (Maize)moderately similar to ( 476) loc_os01g41710 12001.m42672 protein chlorophyll a-b binding protein 2, chloroplast precursor, putative…	2.25	4.1	29.4	10.7	4.25	3.35	6.95	12.4	5	8.85	light harvesting chlorophyll a/b binding protein2
AC208915.3_FG010	'1.1.1.1'	'PS.lightreaction.photosystem II.LHC-II'	'moderately similar to ( 447) AT2G34420 | Symbols: LHB1B2, LHCB1.5 | LHB1B2; chlorophyll binding | chr2:14522716-14523513 REVERSEmoderately similar to ( 481) CB48_MAIZE Chlorophyll a-b binding protein 48, chloroplast precursor (LHCII type I CAB-48) (LHCP) - Zea mays (Maize)moderately similar to ( 480) loc_os01g41710 12001.m42672 protein chlorophyll a-b binding protein 2, chloroplast precursor, pu…	0	0	0	0	0	0.05	0	0.05	0	0
GRMZM2G008859	'1.1.1.1'	'PS.lightreaction.photosystem II.LHC-II'	'moderately similar to ( 235) AT2G15290 | Symbols: ATTIC21, TIC21, CIA5, PIC1 | TIC21 (TRANSLOCON AT INNER MEMBRANE OF CHLOROPLASTS 21); copper uptake transmembrane transporter/ iron ion transmembrane transporter/ protein homodimerization | chr2:6642512-6644011 REVERSEmoderately similar to ( 279) loc_os02g09470 12002.m06244 protein expressed protein seq=cds; coord=4:234569335..234572624:-1; paren…	34.8	38	37.25	31.55	47.3	38.05	38.75	35.8	40.8	33.65
GRMZM2G018627	'1.1.1.1'	'PS.lightreaction.photosystem II.LHC-II'	'moderately similar to ( 469) AT2G05100 | Symbols: LHCB2.1, LHCB2 | LHCB2.1; chlorophyll binding | chr2:1823449-1824331 REVERSEhighly similar to ( 502) CB23_ORYSA Chlorophyll a-b binding protein, chloroplast precursor (LHCII type I CAB) (LHCP) - Oryza sativa (Rice)highly similar to ( 502) loc_os03g39610 12003.m35304 protein chlorophyll a-b binding protein, chloroplast precursor, putative, express…	0	0	0	0	0	0	0	0	0	0	light harvesting chlorophyll binding protein9
GRMZM2G033885	'1.1.1.1'	'PS.lightreaction.photosystem II.LHC-II'	'moderately similar to ( 463) AT5G01530 | Symbols: | chlorophyll A-B binding protein CP29 (LHCB4) | chr5:209084-210243 FORWARDmoderately similar to ( 244) CB29_CHLRE Chlorophyll a-b binding protein CP29 - Chlamydomonas reinhardtiihighly similar to ( 530) loc_os07g37240 12007.m29225 protein expressed protein seq=cds; coord=7:157276217..157277660:-1; parent_gene=GRMZM2G033885'	1	3.5	18.7	3.35	1.55	1.05	1.25	1.55	2.45	9.1
GRMZM2G039996	'1.1.1.1'	'PS.lightreaction.photosystem II.LHC-II'	'moderately similar to ( 388) AT1G15820 | Symbols: LHCB6, CP24 | LHCB6 (LIGHT HARVESTING COMPLEX PSII SUBUNIT 6); chlorophyll binding | chr1:5446685-5447676 REVERSEmoderately similar to ( 388) CB4_SPIOL Chlorophyll a-b binding protein CP24, chloroplast precursor - Spinacia oleracea (Spinach)moderately similar to ( 405) loc_os04g38410 12004.m08831 protein chlorophyll a-b binding protein CP24, chlo…	1.2	2.45	7.85	2.75	1.75	1.25	3.55	7.25	1.65	4.55
GRMZM2G057281	'1.1.1.1'	'PS.lightreaction.photosystem II.LHC-II'	'moderately similar to ( 473) AT5G54270 | Symbols: LHCB3, LHCB3*1 | LHCB3 (LIGHT-HARVESTING CHLOROPHYLL B-BINDING PROTEIN 3); structural molecule | chr5:22038424-22039383 FORWARDhighly similar to ( 504) CB23_HORVU Chlorophyll a-b binding protein of LHCII type III, chloroplast precursor (CAB) - Hordeum vulgare (Barley)moderately similar to ( 494) loc_os07g37550 12007.m079717 protein chlorophyll a-…	2.7	2.55	9.3	4.8	3.5	3	5.45	7	3	24.65
GRMZM2G092427	'1.1.1.1'	'PS.lightreaction.photosystem II.LHC-II'	'moderately similar to ( 279) AT1G15820 | Symbols: LHCB6, CP24 | LHCB6 (LIGHT HARVESTING COMPLEX PSII SUBUNIT 6); chlorophyll binding | chr1:5446685-5447676 REVERSEmoderately similar to ( 282) CB4_SPIOL Chlorophyll a-b binding protein CP24, chloroplast precursor - Spinacia oleracea (Spinach)moderately similar to ( 289) loc_os04g38410 12004.m08831 protein chlorophyll a-b binding protein CP24, chlo…	0	0.5	2.4	0.35	0.05	0.1	0.1	0	0.3	0.8
GRMZM2G104549	'1.1.1.1'	'PS.lightreaction.photosystem II.LHC-II'	'moderately similar to ( 454) AT2G34430 | Symbols: LHB1B1, LHCB1.4 | LHB1B1; chlorophyll binding | chr2:14524818-14525618 FORWARDmoderately similar to ( 490) CB48_MAIZE Chlorophyll a-b binding protein 48, chloroplast precursor (LHCII type I CAB-48) (LHCP) - Zea mays (Maize)moderately similar to ( 488) loc_os01g41710 12001.m42672 protein chlorophyll a-b binding protein 2, chloroplast precursor, pu…	0	0	0	0	0	0	0	0	0	0
GRMZM2G105518	'1.1.1.1'	'PS.lightreaction.photosystem II.LHC-II'	'moderately similar to ( 229) AT2G05100 | Symbols: LHCB2.1, LHCB2 | LHCB2.1; chlorophyll binding | chr2:1823449-1824331 REVERSEmoderately similar to ( 240) CB23_ORYSA Chlorophyll a-b binding protein, chloroplast precursor (LHCII type I CAB) (LHCP) - Oryza sativa (Rice)moderately similar to ( 240) loc_os03g39610 12003.m35304 protein chlorophyll a-b binding protein, chloroplast precursor, putative,…	0	0	0	0	0	0	0	0	0	0
GRMZM2G120619	'1.1.1.1'	'PS.lightreaction.photosystem II.LHC-II'	'moderately similar to ( 453) AT2G34430 | Symbols: LHB1B1, LHCB1.4 | LHB1B1; chlorophyll binding | chr2:14524818-14525618 FORWARDmoderately similar to ( 493) CB48_MAIZE Chlorophyll a-b binding protein 48, chloroplast precursor (LHCII type I CAB-48) (LHCP) - Zea mays (Maize)moderately similar to ( 487) loc_os01g41710 12001.m42672 protein chlorophyll a-b binding protein 2, chloroplast precursor, pu…	0	0	0	0	0	0	0	0	0	0
GRMZM2G131489	'1.1.1.1'	'PS.lightreaction.photosystem II.LHC-II'	'moderately similar to ( 426) AT1G76570 | Symbols: | chlorophyll A-B binding family protein | chr1:28729132-28730754 FORWARDmoderately similar to ( 221) CB25_NICPL Chlorophyll a-b binding protein E, chloroplast precursor (LHCII type I CAB-E) (LHCP) - Nicotiana plumbaginifolia (Leadwort-leaved tobacco)moderately similar to ( 491) loc_os09g12540 12009.m04517 protein chlorophyll a-b binding protein,…	1.05	1	1.65	1.75	1.75	1.35	1.9	1.95	1.85	1.35
GRMZM2G145500	'1.1.1.1'	'PS.lightreaction.photosystem II.LHC-II'	'moderately similar to ( 214) AT2G15290 | Symbols: ATTIC21, TIC21, CIA5, PIC1 | TIC21 (TRANSLOCON AT INNER MEMBRANE OF CHLOROPLASTS 21); copper uptake transmembrane transporter/ iron ion transmembrane transporter/ protein homodimerization | chr2:6642512-6644011 REVERSEmoderately similar to ( 253) loc_os02g09470 12002.m06244 protein expressed protein seq=cds; coord=5:98642457..98651641:1; parent_g…	218.9	208.35	209.45	188.95	240.95	179.6	163.75	218.85	202.3	143.05
GRMZM2G149428	'1.1.1.1'	'PS.lightreaction.photosystem II.LHC-II'	'moderately similar to ( 400) AT4G10340 | Symbols: LHCB5 | LHCB5 (LIGHT HARVESTING COMPLEX OF PHOTOSYSTEM II 5); chlorophyll binding | chr4:6408200-6409496 FORWARDmoderately similar to ( 203) CB2B_PINSY Chlorophyll a-b binding protein type 2 member 1B, chloroplast precursor (Chlorophyll a-b binding protein type II 1B) (CAB) (LHCP) - Pinus sylvestris (Scots pine)moderately similar to ( 471) loc_os…	1.9	4.1	17.9	5.05	2.05	1.25	2.15	4.65	3.5	9.1
GRMZM2G153184	'1.1.1.1'	'PS.lightreaction.photosystem II.LHC-II'	'moderately similar to ( 380) AT3G47470 | Symbols: LHCA4, CAB4 | LHCA4 (LIGHT-HARVESTING CHLOROPHYLL-PROTEIN COMPLEX I SUBUNIT A4); chlorophyll binding | chr3:17493622-17494773 REVERSEmoderately similar to ( 225) CB12_PETHY Chlorophyll a-b binding protein, chloroplast precursor (LHCI type II CAB) - Petunia hybrida (Petunia)moderately similar to ( 416) loc_os08g33820 12008.m080044 protein chloroph…	8.65	14.75	39.05	13.7	6.45	4.95	18.25	22.9	8.75	27.45
GRMZM2G155216	'1.1.1.1'	'PS.lightreaction.photosystem II.LHC-II'	'moderately similar to ( 431) AT2G34420 | Symbols: LHB1B2, LHCB1.5 | LHB1B2; chlorophyll binding | chr2:14522716-14523513 REVERSEmoderately similar to ( 483) CB29_MAIZE Chlorophyll a-b binding protein M9, chloroplast precursor (LHCII type I CAB-M9) (LHCP) - Zea mays (Maize)moderately similar to ( 462) loc_os09g17740 12009.m05032 protein chlorophyll a-b binding protein 1, chloroplast precursor, pu…	0	0.1	2.15	0.15	0.05	0.05	0	0.1	0.25	0.25	light harvesting chlorophyll a/b binding protein3
GRMZM2G160268	'1.1.1.1'	'PS.lightreaction.photosystem II.LHC-II'	'weakly similar to ( 199) AT3G47470 | Symbols: LHCA4, CAB4 | LHCA4 (LIGHT-HARVESTING CHLOROPHYLL-PROTEIN COMPLEX I SUBUNIT A4); chlorophyll binding | chr3:17493622-17494773 REVERSEweakly similar to ( 114) CB12_PETHY Chlorophyll a-b binding protein, chloroplast precursor (LHCI type II CAB) - Petunia hybrida (Petunia)moderately similar to ( 214) loc_os08g33820 12008.m080044 protein chlorophyll a-b …	0.35	1.1	9	1.3	0.4	0.35	0.85	2.15	0.7	2.75
GRMZM2G351977	'1.1.1.1'	'PS.lightreaction.photosystem II.LHC-II'	'moderately similar to ( 463) AT2G34420 | Symbols: LHB1B2, LHCB1.5 | LHB1B2; chlorophyll binding | chr2:14522716-14523513 REVERSEhighly similar to ( 506) CB22_ORYSA Chlorophyll a-b binding protein 2, chloroplast precursor (LHCII type I CAB-2) (LHCP) - Oryza sativa (Rice)highly similar to ( 506) loc_os01g41710 12001.m42672 protein chlorophyll a-b binding protein 2, chloroplast precursor, putative,…	0	0.8	1.3	0.95	0.25	0.1	0.05	0.15	0.7	0.55	light harvesting chlorophyll a/b binding protein1
GRMZM2G402936	'1.1.1.1'	'PS.lightreaction.photosystem II.LHC-II'	'moderately similar to ( 261) AT2G34420 | Symbols: LHB1B2, LHCB1.5 | LHB1B2; chlorophyll binding | chr2:14522716-14523513 REVERSEmoderately similar to ( 278) CB29_MAIZE Chlorophyll a-b binding protein M9, chloroplast precursor (LHCII type I CAB-M9) (LHCP) - Zea mays (Maize)moderately similar to ( 276) loc_os09g17740 12009.m05032 protein chlorophyll a-b binding protein 1, chloroplast precursor, pu…	0.1	1.15	11.05	0.9	0.6	0.3	0.5	0.75	0.7	3.5	light harvesting complex mesophyll7
GRMZM2G414192	'1.1.1.1'	'PS.lightreaction.photosystem II.LHC-II'	'moderately similar to ( 469) AT2G05100 | Symbols: LHCB2.1, LHCB2 | LHCB2.1; chlorophyll binding | chr2:1823449-1824331 REVERSEhighly similar to ( 502) CB23_ORYSA Chlorophyll a-b binding protein, chloroplast precursor (LHCII type I CAB) (LHCP) - Oryza sativa (Rice)highly similar to ( 502) loc_os03g39610 12003.m35304 protein chlorophyll a-b binding protein, chloroplast precursor, putative, express…	0	0	0	0	0	0	0	0	0	0
GRMZM2G429955	'1.1.1.1'	'PS.lightreaction.photosystem II.LHC-II'	'moderately similar to ( 306) AT2G34430 | Symbols: LHB1B1, LHCB1.4 | LHB1B1; chlorophyll binding | chr2:14524818-14525618 FORWARDmoderately similar to ( 298) CB48_MAIZE Chlorophyll a-b binding protein 48, chloroplast precursor (LHCII type I CAB-48) (LHCP) - Zea mays (Maize)moderately similar to ( 324) loc_os01g41710 12001.m42672 protein chlorophyll a-b binding protein 2, chloroplast precursor, pu…	0	0	0.05	0	0.05	0	0.05	0.15	0	0
GRMZM2G000256	'1.1.1.2'	'PS.lightreaction.photosystem II.PSII polypeptide subunits'	'moderately similar to ( 331) AT5G11450 | Symbols: | oxygen-evolving complex-related | chr5:3654475-3656357 FORWARDmoderately similar to ( 451) loc_os01g43070 12001.m42679 protein expressed protein seq=cds; coord=8:144233313..144236568:1; parent_gene=GRMZM2G000256'	24.1	28.55	27	19.9	15.5	16.3	14.8	22.8	18.5	11.65
GRMZM2G005433	'1.1.1.2'	'PS.lightreaction.photosystem II.PSII polypeptide subunits'	'weakly similar to ( 179) AT4G28660 | Symbols: PSB28 | PSB28 (PHOTOSYSTEM II REACTION CENTER PSB28 PROTEIN) | chr4:14150008-14150933 FORWARDmoderately similar to ( 215) loc_os01g71190 12001.m13162 protein photosystem II reaction center W protein, putative, expressed seq=cds; coord=8:159387884..159389335:-1; parent_gene=GRMZM2G005433'	3.9	3.3	3.45	3.95	2.4	2.1	1.6	3.45	2.85	2.9
GRMZM2G005984	'1.1.1.2'	'PS.lightreaction.photosystem II.PSII polypeptide subunits'	'weakly similar to ( 169) AT1G03600 | Symbols: | photosystem II family protein | chr1:898916-899440 FORWARDweakly similar to ( 189) loc_os03g21560 12003.m07560 protein photosystem II 11 kD protein, putative, expressed seq=cds; coord=9:131571333..131572283:-1; parent_gene=GRMZM2G005984'	0.25	0.4	0.85	0.2	0.2	0.15	0.25	1.05	0.2	0.25
GRMZM2G008892	'1.1.1.2'	'PS.lightreaction.photosystem II.PSII polypeptide subunits'	'very weakly similar to (99.0) AT2G01918 | Symbols: | calcium ion binding | chr2:424254-425678 REVERSEvery weakly similar to (83.2) PSBQ_SPIOL Oxygen-evolving enhancer protein 3, chloroplast precursor (OEE3) (16 kDa subunit of oxygen evolving system of photosystem II) (OEC 16 kDa subunit) - Spinacia oleracea (Spinach)weakly similar to ( 184) loc_os04g44200 12004.m09378 protein oxygen-evolving enh…	8.75	12.05	16.25	6.55	1.45	0.9	0.65	1.95	2.2	20.55
GRMZM2G012324	'1.1.1.2'	'PS.lightreaction.photosystem II.PSII polypeptide subunits'	'weakly similar to ( 110) AT5G02120 | Symbols: OHP | OHP (ONE HELIX PROTEIN) | chr5:419144-419633 FORWARDweakly similar to ( 124) loc_os05g22730 12005.m06569 protein expressed protein seq=cds; coord=7:5128016..5130109:-1; parent_gene=GRMZM2G012324'	6.6	9.3	19.95	8.6	4.6	4.35	11.5	16.25	4.35	24.7
GRMZM2G015355	'1.1.1.2'	'PS.lightreaction.photosystem II.PSII polypeptide subunits'	'very weakly similar to ( 100) PSBK_SACOF Photosystem II reaction center protein K precursor (PSII-K) - Saccharum officinarum (Sugarcane)very weakly similar to (93.2) loc_osp1g00140 11562.m00003 protein photosystem II protein K seq=cds; coord=1:265523027..265523369:-1; parent_gene=GRMZM2G015355'	0	0	0	0	0	0	0	0	0	0
GRMZM2G016677	'1.1.1.2'	'PS.lightreaction.photosystem II.PSII polypeptide subunits'	'moderately similar to ( 283) AT2G30790 | Symbols: PSBP-2 | PSBP-2 (photosystem II subunit P-2); calcium ion binding | chr2:13119047-13120090 REVERSEmoderately similar to ( 323) PSBP_WHEAT Oxygen-evolving enhancer protein 2, chloroplast precursor (OEE2) (23 kDa subunit of oxygen evolving system of photosystem II) (OEC 23 kDa subunit) (23 kDa thylakoid membrane protein) - Triticum aestivum (Wheat)…	0.15	0.7	3.35	0.6	0.2	0.1	0.05	0.2	0.15	2.45
GRMZM2G021256	'1.1.1.2'	'PS.lightreaction.photosystem II.PSII polypeptide subunits'	'weakly similar to ( 174) AT1G14150 | Symbols: | oxygen evolving enhancer 3 (PsbQ) family protein | chr1:4839885-4840632 FORWARDmoderately similar to ( 226) loc_os02g36850 12002.m08772 protein oxygen evolving enhancer protein 3, putative, expressed seq=cds; coord=4:125530249..125531339:-1; parent_gene=GRMZM2G021256'	0	0	0	0	0	0	0.05	0	0	0.1
GRMZM2G021617	'1.1.1.2'	'PS.lightreaction.photosystem II.PSII polypeptide subunits'	'weakly similar to ( 193) AT4G05180 | Symbols: PSBQ, PSBQ-2, PSII-Q | PSBQ-2; calcium ion binding | chr4:2672093-2673170 REVERSEmoderately similar to ( 349) PSBQ1_MAIZE Oxygen-evolving enhancer protein 3-1, chloroplast precursor (OEE3) (16 kDa subunit of oxygen evolving system of photosystem II) (OEC 16 kDa subunit) - Zea mays (Maize)moderately similar to ( 257) loc_os07g36080 12007.m079706 prote…	0	0	0	0	0	0	0	0.05	0.05	0.05
GRMZM2G025070	'1.1.1.2'	'PS.lightreaction.photosystem II.PSII polypeptide subunits'	'weakly similar to ( 181) AT4G28660 | Symbols: PSB28 | PSB28 (PHOTOSYSTEM II REACTION CENTER PSB28 PROTEIN) | chr4:14150008-14150933 FORWARDmoderately similar to ( 221) loc_os01g71190 12001.m13162 protein photosystem II reaction center W protein, putative, expressed seq=cds; coord=3:153370745..153373108:-1; parent_gene=GRMZM2G025070'	0	0	0	0	0	0	0	0	0	0
GRMZM2G043500	'1.1.1.2'	'PS.lightreaction.photosystem II.PSII polypeptide subunits'	'very weakly similar to (86.7) AT5G51545 | Symbols: LPA2 | LPA2 (low psii accumulation2) | chr5:20936434-20937243 FORWARDweakly similar to ( 115) loc_os02g03250 12002.m05675 protein expressed protein seq=cds; coord=5:72698736..72700934:1; parent_gene=GRMZM2G043500'	4.9	5.1	6	5.35	6.3	4.15	6.45	4.5	5.15	3.55
GRMZM2G046092	'1.1.1.2'	'PS.lightreaction.photosystem II.PSII polypeptide subunits'	'weakly similar to ( 108) AT5G02120 | Symbols: OHP | OHP (ONE HELIX PROTEIN) | chr5:419144-419633 FORWARDweakly similar to ( 123) loc_os05g22730 12005.m06569 protein expressed protein seq=cds; coord=9:3287415..3289369:1; parent_gene=GRMZM2G046092'	0.05	0.05	0	0	0.05	0	0.05	0	0	0
GRMZM2G047954	'1.1.1.2'	'PS.lightreaction.photosystem II.PSII polypeptide subunits'	'moderately similar to ( 277) AT2G30790 | Symbols: PSBP-2 | PSBP-2 (photosystem II subunit P-2); calcium ion binding | chr2:13119047-13120090 REVERSEmoderately similar to ( 307) PSBP_SPIOL Oxygen-evolving enhancer protein 2, chloroplast precursor (OEE2) (23 kDa subunit of oxygen evolving system of photosystem II) (OEC 23 kDa subunit) (23 kDa thylakoid membrane protein) - Spinacia oleracea (Spinac…	0	0.7	7.75	1.2	0.55	0.25	0.4	1.5	0.6	3.65
GRMZM2G056424	'1.1.1.2'	'PS.lightreaction.photosystem II.PSII polypeptide subunits'	'weakly similar to ( 171) AT1G03600 | Symbols: | photosystem II family protein | chr1:898916-899440 FORWARDweakly similar to ( 197) loc_os03g21560 12003.m07560 protein photosystem II 11 kD protein, putative, expressed seq=cds; coord=1:55454558..55455428:1; parent_gene=GRMZM2G056424'	0.15	0.9	3.55	0.45	0.4	0.05	0.4	0.8	0.5	1.15
GRMZM2G058070	'1.1.1.2'	'PS.lightreaction.photosystem II.PSII polypeptide subunits'	'weakly similar to ( 193) AT4G05180 | Symbols: PSBQ, PSBQ-2, PSII-Q | PSBQ-2; calcium ion binding | chr4:2672093-2673170 REVERSEmoderately similar to ( 349) PSBQ1_MAIZE Oxygen-evolving enhancer protein 3-1, chloroplast precursor (OEE3) (16 kDa subunit of oxygen evolving system of photosystem II) (OEC 16 kDa subunit) - Zea mays (Maize)moderately similar to ( 257) loc_os07g36080 12007.m079706 prote…	0	0	0	0	0	0	0	0.05	0	0.05
GRMZM2G062044	'1.1.1.2'	'PS.lightreaction.photosystem II.PSII polypeptide subunits'	'weakly similar to ( 166) ATCG00580 | Symbols: PSBE | PSII cytochrome b559. There have been many speculations about the function of Cyt b559, but the most favored at present is that it plays a protective role by acting as an electron acceptor or electron donor under conditions when electron flow through PSII is not optimized. | chrC:64071-64322 REVERSEweakly similar to ( 168) PSBE_WHEAT Cytochrom…	0	0	0	0	0	0	0	0	0	0
GRMZM2G067883	'1.1.1.2'	'PS.lightreaction.photosystem II.PSII polypeptide subunits'	'very weakly similar to (81.3) ATCG00070 | Symbols: PSBK | PSII K protein | chrC:7017-7202 FORWARDweakly similar to ( 111) PSBK_SACOF Photosystem II reaction center protein K precursor (PSII-K) - Saccharum officinarum (Sugarcane)weakly similar to ( 104) loc_osp1g00140 11562.m00003 protein photosystem II protein K seq=cds; coord=5:52139261..52140042:1; parent_gene=GRMZM2G067883'	0	0	0	0	0	0	0	0	0.05	0
GRMZM2G072048	'1.1.1.2'	'PS.lightreaction.photosystem II.PSII polypeptide subunits'	'weakly similar to ( 137) AT1G76450 | Symbols: | oxygen-evolving complex-related | chr1:28684618-28686109 FORWARDweakly similar to ( 174) loc_os08g40160 12008.m07996 protein thylakoid lumen protein, chloroplast precursor, putative, expressed seq=cds; coord=2:11737188..11749830:1; parent_gene=GRMZM2G072048'	0	0	0	0	0	0	0	0	0.05	0
GRMZM2G072174	'1.1.1.2'	'PS.lightreaction.photosystem II.PSII polypeptide subunits'	'weakly similar to ( 182) AT2G28605 | Symbols: | Encodes a PsbP domain-OEC23 like protein localized in thylakoid (peripheral-lumenal side). | chr2:12254911-12255689 FORWARDweakly similar to ( 122) loc_os04g35530 12004.m08642 protein expressed protein seq=cds; coord=10:117573348..117574929:1; parent_gene=GRMZM2G072174'	6.5	5.85	5.45	7.05	7.05	6.35	8.35	6.6	7.05	4.1
GRMZM2G075989	'1.1.1.2'	'PS.lightreaction.photosystem II.PSII polypeptide subunits'	'very weakly similar to (80.9) PSBL_TOBAC Photosystem II reaction center protein L (PSII-L) (PSII 5 kDa protein) - Nicotiana tabacum (Common tobacco)very weakly similar to (80.9) loc_osp1g00500 11562.m00041 protein photosystem II protein L seq=cds; coord=2:8924475..8925065:-1; parent_gene=GRMZM2G075989'	0	0	0	0	0	0	0	0	0	0
GRMZM2G077333	'1.1.1.2'	'PS.lightreaction.photosystem II.PSII polypeptide subunits'	'moderately similar to ( 273) AT1G44575 | Symbols: NPQ4, PSBS | NPQ4 (NONPHOTOCHEMICAL QUENCHING); chlorophyll binding / xanthophyll binding | chr1:16871768-16872548 FORWARDmoderately similar to ( 286) PSBS_SPIOL Photosystem II 22 kDa protein, chloroplast precursor (CP22) - Spinacia oleracea (Spinach)moderately similar to ( 305) loc_os01g64960 12001.m150788 protein photosystem II 22 kDa protein, …	0.1	0.15	0.8	0.1	0.05	0	0.05	0	0.35	0.15
GRMZM2G087435	'1.1.1.2'	'PS.lightreaction.photosystem II.PSII polypeptide subunits'	'weakly similar to ( 158) AT1G05385 | Symbols: | photosystem II 11 kDa protein-related | chr1:1582747-1583648 REVERSEmoderately similar to ( 206) loc_os03g53640 12003.m10335 protein expressed protein seq=cds; coord=5:7442570..7443838:1; parent_gene=GRMZM2G087435'	1.95	0.8	1.15	1.4	0.6	0.4	0.6	0.95	0.6	0.65
GRMZM2G087590	'1.1.1.2'	'PS.lightreaction.photosystem II.PSII polypeptide subunits'	'moderately similar to ( 326) AT1G77090 | Symbols: | thylakoid lumenal 29.8 kDa protein | chr1:28960576-28961875 REVERSEmoderately similar to ( 372) loc_os12g08830 12012.m26739 protein tat pathway signal sequence family protein, expressed seq=cds; coord=3:138643946..138645400:-1; parent_gene=GRMZM2G087590'	16.9	15	18.35	15.95	4.95	8	12.1	12.65	15.05	13.85
GRMZM2G101617	'1.1.1.2'	'PS.lightreaction.photosystem II.PSII polypeptide subunits'	'moderately similar to ( 330) AT3G56650 | Symbols: | thylakoid lumenal 20 kDa protein | chr3:20984807-20985913 FORWARDmoderately similar to ( 377) loc_os01g59090 12001.m12048 protein expressed protein seq=cds; coord=3:187532722..187534294:-1; parent_gene=GRMZM2G101617'	0.3	0.25	1	0.3	0.1	0.2	0.2	1	0.15	0
GRMZM2G108467	'1.1.1.2'	'PS.lightreaction.photosystem II.PSII polypeptide subunits'	'weakly similar to ( 166) ATCG00580 | Symbols: PSBE | PSII cytochrome b559. There have been many speculations about the function of Cyt b559, but the most favored at present is that it plays a protective role by acting as an electron acceptor or electron donor under conditions when electron flow through PSII is not optimized. | chrC:64071-64322 REVERSEweakly similar to ( 168) PSBE_WHEAT Cytochrom…	0	0	0	0	0	0	0	0	0	0
GRMZM2G113349	'1.1.1.2'	'PS.lightreaction.photosystem II.PSII polypeptide subunits'	'highly similar to ( 504) AT3G50820 | Symbols: PSBO2, PSBO-2, OEC33 | PSBO2 (PHOTOSYSTEM II SUBUNIT O-2); oxygen evolving/ poly(U) binding | chr3:18891008-18892311 REVERSEhighly similar to ( 527) PSBO_SOLTU Oxygen-evolving enhancer protein 1, chloroplast precursor (OEE1) (33 kDa subunit of oxygen evolving system of photosystem II) (OEC 33 kDa subunit) (33 kDa thylakoid membrane protein) - Solanum…	17.3	6.25	13.05	26.1	4.1	6.25	27.1	41.4	8.7	9.85
GRMZM2G114399	'1.1.1.2'	'PS.lightreaction.photosystem II.PSII polypeptide subunits'	'moderately similar to ( 245) AT5G11450 | Symbols: | oxygen-evolving complex-related | chr5:3654475-3656357 FORWARDmoderately similar to ( 350) loc_os01g43070 12001.m42679 protein expressed protein seq=cds; coord=3:218491530..218494891:-1; parent_gene=GRMZM2G114399'	27.5	30	27.6	23.15	12.6	14.55	11.3	19.3	18.15	9.65
GRMZM2G117572	'1.1.1.2'	'PS.lightreaction.photosystem II.PSII polypeptide subunits'	'weakly similar to ( 166) ATCG00580 | Symbols: PSBE | PSII cytochrome b559. There have been many speculations about the function of Cyt b559, but the most favored at present is that it plays a protective role by acting as an electron acceptor or electron donor under conditions when electron flow through PSII is not optimized. | chrC:64071-64322 REVERSEweakly similar to ( 168) PSBE_WHEAT Cytochrom…	0.25	0.6	0.2	0.15	0.1	0.35	0.25	0.05	0.3	0.15
GRMZM2G125575	'1.1.1.2'	'PS.lightreaction.photosystem II.PSII polypeptide subunits'	'weakly similar to ( 161) ATCG00580 | Symbols: PSBE | PSII cytochrome b559. There have been many speculations about the function of Cyt b559, but the most favored at present is that it plays a protective role by acting as an electron acceptor or electron donor under conditions when electron flow through PSII is not optimized. | chrC:64071-64322 REVERSEweakly similar to ( 164) PSBE_WHEAT Cytochrom…	0	0	0	0	0	0	0	0	0	0
GRMZM2G132506	'1.1.1.2'	'PS.lightreaction.photosystem II.PSII polypeptide subunits'	'weakly similar to ( 182) AT4G28660 | Symbols: PSB28 | PSB28 (PHOTOSYSTEM II REACTION CENTER PSB28 PROTEIN) | chr4:14150008-14150933 FORWARDmoderately similar to ( 241) loc_os01g71190 12001.m13162 protein photosystem II reaction center W protein, putative, expressed seq=cds; coord=3:153763347..153764378:-1; parent_gene=GRMZM2G132506'	0	0	0	0	0	0	0	0	0	0
GRMZM2G134130	'1.1.1.2'	'PS.lightreaction.photosystem II.PSII polypeptide subunits'	'very weakly similar to (82.8) AT1G67740 | Symbols: PSBY, YCF32 | PSBY | chr1:25394429-25394998 REVERSEvery weakly similar to (87.0) PSBY_SPIOL Photosystem II core complex proteins psbY, chloroplast precursor (L-arginine-metabolizing enzyme) (L-AME) [Contains: Photosystem II protein psbY-1 (psbY-A1); Photosystem II protein psbY-2 (psbY-A2)] - Spinacia oleracea (Spinach)very weakly similar to (96.…	0	0.25	1	0.4	0.25	0.15	0.7	1.2	0.1	0.7
GRMZM2G172723	'1.1.1.2'	'PS.lightreaction.photosystem II.PSII polypeptide subunits'	'moderately similar to ( 223) AT1G76450 | Symbols: | oxygen-evolving complex-related | chr1:28684618-28686109 FORWARDmoderately similar to ( 286) loc_os08g40160 12008.m07996 protein thylakoid lumen protein, chloroplast precursor, putative, expressed seq=cds; coord=1:189400505..189403082:1; parent_gene=GRMZM2G172723'	0.3	0.65	1.3	0.45	0.2	0.1	0.05	0.1	0.05	6.55
GRMZM2G174984	'1.1.1.2'	'PS.lightreaction.photosystem II.PSII polypeptide subunits'	'weakly similar to ( 140) AT1G79040 | Symbols: PSBR | PSBR (photosystem II subunit R) | chr1:29736085-29736781 FORWARDweakly similar to ( 154) PSBR_SOLTU Photosystem II 10 kDa polypeptide, chloroplast precursor (Light-inducible tissue-specific ST-LS1 protein) - Solanum tuberosum (Potato)weakly similar to ( 174) loc_os08g10020 12008.m26609 protein photosystem II 10 kDa polypeptide, chloroplast pre…	0.1	0.9	7.55	1	0.35	0.5	1.05	2.2	0.55	3.5
GRMZM2G175562	'1.1.1.2'	'PS.lightreaction.photosystem II.PSII polypeptide subunits'	'moderately similar to ( 405) AT3G50820 | Symbols: PSBO2, PSBO-2, OEC33 | PSBO2 (PHOTOSYSTEM II SUBUNIT O-2); oxygen evolving/ poly(U) binding | chr3:18891008-18892311 REVERSEmoderately similar to ( 421) PSBO_TOBAC Oxygen-evolving enhancer protein 1, chloroplast precursor (OEE1) (33 kDa subunit of oxygen evolving system of photosystem II) (OEC 33 kDa subunit) (33 kDa thylakoid membrane protein) -…	0.5	2.9	22.2	2.05	1.2	0.85	1.8	5.6	1.65	7.85
GRMZM2G175804	'1.1.1.2'	'PS.lightreaction.photosystem II.PSII polypeptide subunits'	'weakly similar to ( 181) AT4G28660 | Symbols: PSB28 | PSB28 (PHOTOSYSTEM II REACTION CENTER PSB28 PROTEIN) | chr4:14150008-14150933 FORWARDmoderately similar to ( 221) loc_os01g71190 12001.m13162 protein photosystem II reaction center W protein, putative, expressed seq=cds; coord=3:153502401..153504764:-1; parent_gene=GRMZM2G175804'	0	0	0	0	0	0	0	0	0	0
GRMZM2G176840	'1.1.1.2'	'PS.lightreaction.photosystem II.PSII polypeptide subunits'	'moderately similar to ( 253) AT3G55330 | Symbols: PPL1 | PPL1 (PsbP-like protein 1); calcium ion binding | chr3:20514031-20515275 REVERSEmoderately similar to ( 308) loc_os08g25900 12008.m06605 protein chloroplast oxygen-evolving complex/thylakoid lumenal 25.6kDa protein, putative, expressed seq=cds; coord=1:4764679..4766990:-1; parent_gene=GRMZM2G176840'	9.2	7.55	10.15	10.8	10.55	9.8	13.1	14.05	9.85	7.8
GRMZM2G308944	'1.1.1.2'	'PS.lightreaction.photosystem II.PSII polypeptide subunits'	'very weakly similar to (87.8) AT1G67740 | Symbols: PSBY, YCF32 | PSBY | chr1:25394429-25394998 REVERSEvery weakly similar to (94.0) PSBY_SPIOL Photosystem II core complex proteins psbY, chloroplast precursor (L-arginine-metabolizing enzyme) (L-AME) [Contains: Photosystem II protein psbY-1 (psbY-A1); Photosystem II protein psbY-2 (psbY-A2)] - Spinacia oleracea (Spinach)very weakly similar to ( 10…	0	0.2	1.75	0.2	0.05	0.1	0.25	1.35	0.1	0.5
GRMZM2G358180	'1.1.1.2'	'PS.lightreaction.photosystem II.PSII polypeptide subunits'	'weakly similar to ( 184) ATCG00280 | Symbols: PSBC | chloroplast gene encoding a CP43 subunit of the photosystem II reaction center. promoter contains a blue-light responsive element. | chrC:33720-35141 FORWARDweakly similar to ( 194) PSBC_SACOF Photosystem II 44 kDa reaction center protein (P6 protein) (CP43) - Saccharum officinarum (Sugarcane)weakly similar to ( 189) loc_osp1g00180 11562.m0000…	0	0	0	0	0	0	0	0	0	0
GRMZM2G374263	'1.1.1.2'	'PS.lightreaction.photosystem II.PSII polypeptide subunits'	'very weakly similar to (98.6) ATCG00300 | Symbols: YCF9 | encodes PsbZ, which is a subunit of photosystem II. In Chlamydomonas, this protein has been shown to be essential in the interaction between PS II and the light harvesting complex II. | chrC:35751-35939 FORWARDweakly similar to ( 105) PSBZ_WHEAT Photosystem II reaction center protein Z (PSII-Z) - Triticum aestivum (Wheat)weakly similar to…	0	0	0	0	0	0	0	0	0	0
GRMZM2G394732	'1.1.1.2'	'PS.lightreaction.photosystem II.PSII polypeptide subunits'	'weakly similar to ( 110) ATCG00300 | Symbols: YCF9 | encodes PsbZ, which is a subunit of photosystem II. In Chlamydomonas, this protein has been shown to be essential in the interaction between PS II and the light harvesting complex II. | chrC:35751-35939 FORWARDweakly similar to ( 118) PSBZ_WHEAT Photosystem II reaction center protein Z (PSII-Z) - Triticum aestivum (Wheat)weakly similar to ( 11…	0.2	0.2	0.2	0.2	0.05	0.1	0.1	0.1	0.1	0.05
GRMZM2G414660	'1.1.1.2'	'PS.lightreaction.photosystem II.PSII polypeptide subunits'	'weakly similar to ( 110) ATCG00300 | Symbols: YCF9 | encodes PsbZ, which is a subunit of photosystem II. In Chlamydomonas, this protein has been shown to be essential in the interaction between PS II and the light harvesting complex II. | chrC:35751-35939 FORWARDweakly similar to ( 118) PSBZ_WHEAT Photosystem II reaction center protein Z (PSII-Z) - Triticum aestivum (Wheat)weakly similar to ( 11…	0	0	0	0	0	0	0	0	0	0
GRMZM2G419244	'1.1.1.2'	'PS.lightreaction.photosystem II.PSII polypeptide subunits'	'weakly similar to ( 144) AT1G76450 | Symbols: | oxygen-evolving complex-related | chr1:28684618-28686109 FORWARDweakly similar to ( 179) loc_os08g40160 12008.m07996 protein thylakoid lumen protein, chloroplast precursor, putative, expressed seq=cds; coord=9:17311875..17314032:1; parent_gene=GRMZM2G419244'	0	0	0	0	0	0	0	0	0	0
GRMZM2G425136	'1.1.1.2'	'PS.lightreaction.photosystem II.PSII polypeptide subunits'	'very weakly similar to (82.0) AT1G77090 | Symbols: | thylakoid lumenal 29.8 kDa protein | chr1:28960576-28961875 REVERSEweakly similar to ( 110) loc_os12g08830 12012.m26739 protein tat pathway signal sequence family protein, expressed seq=cds; coord=5:68359890..68360435:1; parent_gene=GRMZM2G425136'	0	0	0	0	0	0	0	0	0	0
GRMZM2G433927	'1.1.1.2'	'PS.lightreaction.photosystem II.PSII polypeptide subunits'	'weakly similar to ( 120) ATCG00580 | Symbols: PSBE | PSII cytochrome b559. There have been many speculations about the function of Cyt b559, but the most favored at present is that it plays a protective role by acting as an electron acceptor or electron donor under conditions when electron flow through PSII is not optimized. | chrC:64071-64322 REVERSEweakly similar to ( 120) PSBE_SOLTU Cytochrom…	0	0	0	0	0	0	0	0	0	0
GRMZM2G436986	'1.1.1.2'	'PS.lightreaction.photosystem II.PSII polypeptide subunits'	'weakly similar to ( 161) AT3G01440 | Symbols: | oxygen evolving enhancer 3 (PsbQ) family protein | chr3:168478-169407 FORWARDmoderately similar to ( 254) loc_os07g01480 12007.m04628 protein oxygen evolving enhancer protein 3 containing protein, expressed seq=cds; coord=7:1139895..1142388:1; parent_gene=GRMZM2G436986'	104.9	87.4	115.4	144.3	215.3	226	211.2	142.6	222.45	245.8
GRMZM2G441888	'1.1.1.2'	'PS.lightreaction.photosystem II.PSII polypeptide subunits'	'moderately similar to ( 274) loc_os08g39430 12008.m07924 protein thylakoid lumenal 19 kDa protein, chloroplast precursor, putative, expressed seq=cds; coord=1:187383447..187384622:-1; parent_gene=GRMZM2G441888'	2.9	3.65	2.45	3.55	2.7	4.25	5.35	4.9	5.95	5.25
GRMZM2G446737	'1.1.1.2'	'PS.lightreaction.photosystem II.PSII polypeptide subunits'	'weakly similar to ( 154) loc_os04g44190 12004.m78971 protein expressed protein seq=cds; coord=10:131049866..131053321:1; parent_gene=GRMZM2G446737'	0.45	0.5	0.2	0.45	0.1	0	0	0	0.05	0.3
GRMZM2G455413	'1.1.1.2'	'PS.lightreaction.photosystem II.PSII polypeptide subunits'	'moderately similar to ( 377) ATCG00020 | Symbols: PSBA | Encodes chlorophyll binding protein D1, a part of the photosystem II reaction center core | chrC:383-1444 REVERSEmoderately similar to ( 378) PSBA_WHEAT Photosystem Q(B) protein (32 kDa thylakoid membrane protein) (Photosystem II protein D1) - Triticum aestivum (Wheat)moderately similar to ( 377) loc_os10g21200 12010.m05138 protein photosy…	0	0	0	0	0	0	0	0	0	0
GRMZM2G455676	'1.1.1.2'	'PS.lightreaction.photosystem II.PSII polypeptide subunits'	'very weakly similar to (94.7) AT4G28660 | Symbols: PSB28 | PSB28 (PHOTOSYSTEM II REACTION CENTER PSB28 PROTEIN) | chr4:14150008-14150933 FORWARDweakly similar to ( 114) loc_os01g71190 12001.m13162 protein photosystem II reaction center W protein, putative, expressed seq=cds; coord=3:153640473..153644498:-1; parent_gene=GRMZM2G455676'	0	0	0	0	0	0	0	0	0	0
GRMZM2G466743	'1.1.1.2'	'PS.lightreaction.photosystem II.PSII polypeptide subunits'	'weakly similar to ( 108) AT5G02120 | Symbols: OHP | OHP (ONE HELIX PROTEIN) | chr5:419144-419633 FORWARDweakly similar to ( 122) loc_os05g22730 12005.m06569 protein expressed protein seq=cds; coord=2:120362096..120364028:1; parent_gene=GRMZM2G466743'	0	0	0	0	0	0	0	0	0	0
GRMZM2G468702	'1.1.1.2'	'PS.lightreaction.photosystem II.PSII polypeptide subunits'	'weakly similar to ( 117) AT4G28660 | Symbols: PSB28 | PSB28 (PHOTOSYSTEM II REACTION CENTER PSB28 PROTEIN) | chr4:14150008-14150933 FORWARDweakly similar to ( 138) loc_os01g71190 12001.m13162 protein photosystem II reaction center W protein, putative, expressed seq=cds; coord=3:154563486..154565951:-1; parent_gene=GRMZM2G468702'	0	0	0	0	0	0	0	0	0	0.15
GRMZM2G586702	'1.1.1.2'	'PS.lightreaction.photosystem II.PSII polypeptide subunits'	'very weakly similar to (89.7) ATCG00280 | Symbols: PSBC | chloroplast gene encoding a CP43 subunit of the photosystem II reaction center. promoter contains a blue-light responsive element. | chrC:33720-35141 FORWARDvery weakly similar to (92.4) PSBC_SACOF Photosystem II 44 kDa reaction center protein (P6 protein) (CP43) - Saccharum officinarum (Sugarcane)very weakly similar to (92.4) loc_osp1g00…	0	0	0	0	0	0	0	0	0	0
GRMZM2G702068	'1.1.1.2'	'PS.lightreaction.photosystem II.PSII polypeptide subunits'	'very weakly similar to (80.5) PSBC_ORYSA Photosystem II 44 kDa reaction center protein (P6 protein) (CP43) - Oryza sativa (Rice)very weakly similar to (80.5) loc_osp1g00180 11562.m00007 protein photosystem II 44 kDa protein seq=cds; coord=5:179612471..179612774:1; parent_gene=GRMZM2G702068'	0	0	0	0	0	0	0	0	0	0
GRMZM5G804323	'1.1.1.2'	'PS.lightreaction.photosystem II.PSII polypeptide subunits'	'moderately similar to ( 209) AT4G21280 | Symbols: PSBQ, PSBQA, PSBQ-1 | oxygen-evolving enhancer protein 3, chloroplast, putative (PSBQ1) (PSBQ) | chr4:11334446-11335587 FORWARDmoderately similar to ( 305) PSBQ1_MAIZE Oxygen-evolving enhancer protein 3-1, chloroplast precursor (OEE3) (16 kDa subunit of oxygen evolving system of photosystem II) (OEC 16 kDa subunit) - Zea mays (Maize)moderately si…	11.8	11.1	12.65	10.5	9.75	7.65	8.2	8.6	8.35	8.95
GRMZM5G808939	'1.1.1.2'	'PS.lightreaction.photosystem II.PSII polypeptide subunits'	'nearly identical (1006) ATCG00680 | Symbols: PSBB | encodes for CP47, subunit of the photosystem II reaction center. | chrC:72371-73897 FORWARDnearly identical (1036) PSBB_SACOF Photosystem II P680 chlorophyll A apoprotein (CP-47 protein) - Saccharum officinarum (Sugarcane)nearly identical (1020) loc_osp1g00600 11562.m00051 protein photosystem II 47 kDa protein seq=cds; coord=Pt:70706..72490:1; …	0	0	0	0	0	0	0	0	0.05	0
GRMZM5G831399	'1.1.1.2'	'PS.lightreaction.photosystem II.PSII polypeptide subunits'	'weakly similar to ( 124) ATCG00710 | Symbols: PSBH | Encodes a 8 kD phosphoprotein that is a component of the photosystem II oxygen evolving core. Its exact molecular function has not been determined but it may play a role in mediating electron transfer between the secondary quinone acceptors, QA and QB, associated with the acceptor side of PSII. | chrC:74485-74706 FORWARDweakly similar to ( 144…	0	0	0	0.05	0	0	0	0	0	0
GRMZM5G844143	'1.1.1.2'	'PS.lightreaction.photosystem II.PSII polypeptide subunits'	'moderately similar to ( 425) ATCG00020 | Symbols: PSBA | Encodes chlorophyll binding protein D1, a part of the photosystem II reaction center core | chrC:383-1444 REVERSEmoderately similar to ( 434) PSBA_MAIZE Photosystem Q(B) protein (32 kDa thylakoid membrane protein) (Photosystem II protein D1) - Zea mays (Maize)moderately similar to ( 430) loc_os10g21200 12010.m05138 protein photosystem Q, p…	0	0	0	0	0	0	0	0	0	0
GRMZM5G856777	'1.1.1.2'	'PS.lightreaction.photosystem II.PSII polypeptide subunits'	'highly similar to ( 847) ATCG00280 | Symbols: PSBC | chloroplast gene encoding a CP43 subunit of the photosystem II reaction center. promoter contains a blue-light responsive element. | chrC:33720-35141 FORWARDhighly similar to ( 886) PSBC_MAIZE Photosystem II 44 kDa reaction center protein (P6 protein) (CP43) - Zea mays (Maize)highly similar to ( 868) loc_osp1g00180 11562.m00007 protein photosy…	1.6	1.25	1.85	6.1	0.95	1.25	0.75	0.5	0.55	0.2
GRMZM5G870219	'1.1.1.2'	'PS.lightreaction.photosystem II.PSII polypeptide subunits'	'very weakly similar to ( 100) AT1G14150 | Symbols: | oxygen evolving enhancer 3 (PsbQ) family protein | chr1:4839885-4840632 FORWARDweakly similar to ( 147) loc_os02g36850 12002.m08772 protein oxygen evolving enhancer protein 3, putative, expressed seq=cds; coord=5:176799407..176800431:-1; parent_gene=GRMZM5G870219'	0	0.05	0	0	0.05	0	0	0	0	0
GRMZM5G878778	'1.1.1.2'	'PS.lightreaction.photosystem II.PSII polypeptide subunits'	'very weakly similar to (82.0) PSBF_SOLTU Cytochrome b559 subunit beta (PSII reaction center subunit VI) - Solanum tuberosum (Potato)very weakly similar to (82.0) loc_osp1g00510 11562.m00042 protein cytochrome b559 beta chain seq=cds; coord=Pt:63734..63853:-1; parent_gene=GRMZM5G878778'	0	0	0	0	0	0	0	0	0	0
GRMZM5G883564	'1.1.1.2'	'PS.lightreaction.photosystem II.PSII polypeptide subunits'	'very weakly similar to (92.4) loc_os01g71190 12001.m13162 protein photosystem II reaction center W protein, putative, expressed seq=cds; coord=3:153505879..153506422:-1; parent_gene=GRMZM5G883564'	0	0	0	0	0	0	0	0	0	0
GRMZM2G156581	'1.1.2'	'PS.lightreaction.photosystem I'	'moderately similar to ( 289) AT3G21740 | Symbols: APO4 | APO4 (ACCUMULATION OF PHOTOSYSTEM ONE 4) | chr3:7662542-7663638 REVERSEmoderately similar to ( 404) loc_os04g53612 12004.m35056 protein expressed protein seq=cds; coord=2:12009771..12011967:-1; parent_gene=GRMZM2G156581'	7.05	7.55	6.55	8.95	10.8	9.4	12.2	8.85	12.15	11.3
GRMZM2G010884	'1.1.2.1'	'PS.lightreaction.photosystem I.LHC-I'	'moderately similar to ( 423) AT1G61520 | Symbols: LHCA3 | LHCA3; chlorophyll binding | chr1:22700493-22701149 FORWARDweakly similar to ( 145) CB12_PETHY Chlorophyll a-b binding protein, chloroplast precursor (LHCI type II CAB) - Petunia hybrida (Petunia)moderately similar to ( 437) loc_os02g10390 12002.m33354 protein chlorophyll a-b binding protein 8, chloroplast precursor, putative, expressed s…	0.2	2.1	10.1	1.4	1.05	0.45	0.7	2.7	1	7.25
GRMZM2G019807	'1.1.2.1'	'PS.lightreaction.photosystem I.LHC-I'	'weakly similar to ( 137) AT1G34000 | Symbols: OHP2 | OHP2 (ONE-HELIX PROTEIN 2) | chr1:12358151-12358902 REVERSEweakly similar to ( 191) loc_os01g40710 12001.m10341 protein OHP2, putative, expressed seq=cds; coord=3:221634465..221635939:1; parent_gene=GRMZM2G019807'	13.35	9.95	7.4	11.2	7.5	7.35	7.95	8.85	9.4	6.1
GRMZM2G036880	'1.1.2.1'	'PS.lightreaction.photosystem I.LHC-I'	'moderately similar to ( 377) AT3G54890 | Symbols: LHCA1 | LHCA1; chlorophyll binding | chr3:20339881-20340922 REVERSEweakly similar to ( 144) CB21_SINAL Chlorophyll a-b binding protein 1, chloroplast precursor (LHCII type I CAB-1) (LHCP) - Sinapis alba (White mustard) (Brassica hirta)moderately similar to ( 427) loc_os06g21590 12006.m32064 protein chlorophyll a-b binding protein 6A, chloroplast …	0	0	0	0	0	0	0	0	0	0
GRMZM2G038519	'1.1.2.1'	'PS.lightreaction.photosystem I.LHC-I'	'moderately similar to ( 392) AT3G61470 | Symbols: LHCA2 | LHCA2; chlorophyll binding | chr3:22745736-22747032 FORWARDmoderately similar to ( 388) CB12_PETHY Chlorophyll a-b binding protein, chloroplast precursor (LHCI type II CAB) - Petunia hybrida (Petunia)moderately similar to ( 410) loc_os07g38960 12007.m29236 protein chlorophyll a-b binding protein, chloroplast precursor, putative, expressed…	1.9	2.25	5.5	3	1.2	0.5	1.3	1.9	1.9	2.6
GRMZM2G072280	'1.1.2.1'	'PS.lightreaction.photosystem I.LHC-I'	'moderately similar to ( 390) AT3G61470 | Symbols: LHCA2 | LHCA2; chlorophyll binding | chr3:22745736-22747032 FORWARDmoderately similar to ( 386) CB12_PETHY Chlorophyll a-b binding protein, chloroplast precursor (LHCI type II CAB) - Petunia hybrida (Petunia)moderately similar to ( 405) loc_os07g38960 12007.m29236 protein chlorophyll a-b binding protein, chloroplast precursor, putative, expressed…	0.75	1.2	6.15	0.95	0.6	0.1	0.3	0.5	0.65	2.45
GRMZM2G092311	'1.1.2.1'	'PS.lightreaction.photosystem I.LHC-I'	'moderately similar to ( 384) AT3G54890 | Symbols: LHCA1 | LHCA1; chlorophyll binding | chr3:20339881-20340922 REVERSEweakly similar to ( 146) CB21_SINAL Chlorophyll a-b binding protein 1, chloroplast precursor (LHCII type I CAB-1) (LHCP) - Sinapis alba (White mustard) (Brassica hirta)moderately similar to ( 468) loc_os06g21590 12006.m32064 protein chlorophyll a-b binding protein 6A, chloroplast …	0.25	2	13.4	1.7	1.35	0.65	1.6	7.15	1.3	7.6
GRMZM2G103101	'1.1.2.1'	'PS.lightreaction.photosystem I.LHC-I'	'moderately similar to ( 238) AT1G45474 | Symbols: LHCA5 | LHCA5; pigment binding | chr1:17179353-17180439 FORWARDweakly similar to ( 108) CB12_PETHY Chlorophyll a-b binding protein, chloroplast precursor (LHCI type II CAB) - Petunia hybrida (Petunia)moderately similar to ( 285) loc_os02g52650 12002.m10295 protein chlorophyll a-b binding protein 4, chloroplast precursor, putative, expressed seq=c…	0.15	0.2	0.25	0.4	0.15	0.15	0.25	0.15	0.1	0.25
GRMZM2G117412	'1.1.2.1'	'PS.lightreaction.photosystem I.LHC-I'	'moderately similar to ( 382) AT1G19150 | Symbols: LHCA6, LHCA2*1 | LHCA6; chlorophyll binding | chr1:6612806-6613799 FORWARDmoderately similar to ( 311) CB12_PETHY Chlorophyll a-b binding protein, chloroplast precursor (LHCI type II CAB) - Petunia hybrida (Petunia)moderately similar to ( 448) loc_os09g26810 12009.m05833 protein chlorophyll a-b binding protein, chloroplast precursor, putative, ex…	0	0.15	0.05	0	0	0	0.05	0	0.1	0.05
GRMZM2G143469	'1.1.2.1'	'PS.lightreaction.photosystem I.LHC-I'	'weakly similar to ( 135) AT1G34000 | Symbols: OHP2 | OHP2 (ONE-HELIX PROTEIN 2) | chr1:12358151-12358902 REVERSEweakly similar to ( 188) loc_os01g40710 12001.m10341 protein OHP2, putative, expressed seq=cds; coord=8:140467509..140468800:1; parent_gene=GRMZM2G143469'	6.8	7.2	7.4	8.2	4.25	6.8	11.85	10.65	1.8	5.4
GRMZM2G000781	'1.1.2.2'	'PS.lightreaction.photosystem I.PSI polypeptide subunits'	'weakly similar to ( 158) ATCG01060 | Symbols: PSAC | Encodes the PsaC subunit of photosystem I. | chrC:117318-117563 REVERSEweakly similar to ( 165) PSAC_WHEAT Photosystem I iron-sulfur center (Photosystem I subunit VII) (9 kDa polypeptide) (PSI-C) (PsaC) - Triticum aestivum (Wheat)weakly similar to ( 167) loc_osp1g00920 11562.m00083 protein photosystem I subunit VII seq=cds; coord=4:90620223..9…	0	0	0	0	0	0	0	0	0	0
GRMZM2G001653	'1.1.2.2'	'PS.lightreaction.photosystem I.PSI polypeptide subunits'	'weakly similar to ( 197) AT1G08380 | Symbols: PSAO | PSAO (photosystem I subunit O) | chr1:2641004-2641739 REVERSEmoderately similar to ( 256) loc_os04g33830 12004.m08478 protein 16kDa membrane protein, putative, expressed seq=cds; coord=2:56107545..56109039:-1; parent_gene=GRMZM2G001653'	0.15	0.4	2.75	0.45	0.15	0.05	0	0.1	0.4	1.1
GRMZM2G009048	'1.1.2.2'	'PS.lightreaction.photosystem I.PSI polypeptide subunits'	'weakly similar to ( 164) AT5G64040 | Symbols: PSAN | PSAN; calmodulin binding | chr5:25628690-25629409 REVERSEweakly similar to ( 183) PSAN_HORVU Photosystem I reaction center subunit N, chloroplast precursor (PSI-N) - Hordeum vulgare (Barley)weakly similar to ( 184) loc_os12g08770 12012.m04863 protein photosystem I reaction center subunit N, chloroplast precursor, putative, expressed seq=cds; c…	0.2	0.8	1.9	0.5	0.25	0.25	0.8	0.75	0.3	0.75
GRMZM2G012397	'1.1.2.2'	'PS.lightreaction.photosystem I.PSI polypeptide subunits'	'weakly similar to ( 148) AT1G30380 | Symbols: PSAK | PSAK (photosystem I subunit K) | chr1:10722325-10723013 FORWARDweakly similar to ( 182) PSAK_HORVU Photosystem I reaction center subunit psaK, chloroplast precursor (Photosystem I subunit X) (PSI-K) (Light-harvesting complex I 7 kDa protein) - Hordeum vulgare (Barley)weakly similar to ( 185) loc_os07g05480 12007.m079603 protein photosystem I r…	0.8	2.8	8.5	1.6	0.75	0.3	1.35	4.65	0.8	6.7
GRMZM2G013342	'1.1.2.2'	'PS.lightreaction.photosystem I.PSI polypeptide subunits'	'moderately similar to ( 276) AT4G02770 | Symbols: PSAD-1 | PSAD-1 (photosystem I subunit D-1) | chr4:1229247-1229873 REVERSEmoderately similar to ( 286) PSAD_HORVU Photosystem I reaction center subunit II, chloroplast precursor (Photosystem I 20 kDa subunit) (PSI-D) - Hordeum vulgare (Barley)moderately similar to ( 290) loc_os08g44680 12008.m08440 protein photosystem I reaction center subunit II…	0.3	1.05	3.85	0.9	0.75	0.45	0.8	1.55	0.55	4.8
GRMZM2G016066	'1.1.2.2'	'PS.lightreaction.photosystem I.PSI polypeptide subunits'	'weakly similar to ( 131) AT2G20260 | Symbols: PSAE-2 | PSAE-2 (photosystem I subunit E-2); catalytic | chr2:8736780-8737644 FORWARDweakly similar to ( 170) PSAE_HORVU Photosystem I reaction center subunit IV, chloroplast precursor (PSI-E) (Photosystem I 10.8 kDa polypeptide) - Hordeum vulgare (Barley)weakly similar to ( 160) loc_os07g25430 12007.m29150 protein photosystem I reaction center subun…	0.4	3.25	16.5	3.15	1.7	0.85	1.5	4.95	1.9	7.6
GRMZM2G016622	'1.1.2.2'	'PS.lightreaction.photosystem I.PSI polypeptide subunits'	'weakly similar to ( 116) PSAE_HORVU Photosystem I reaction center subunit IV, chloroplast precursor (PSI-E) (Photosystem I 10.8 kDa polypeptide) - Hordeum vulgare (Barley)very weakly similar to ( 100) loc_os07g25430 12007.m29150 protein photosystem I reaction center subunit IV A, chloroplast precursor, putative, expressed seq=cds; coord=7:38025162..38027027:1; parent_gene=GRMZM2G016622'	0.15	1.1	6.2	1.35	0.3	0.5	0.4	2	0.65	2.6
GRMZM2G017290	'1.1.2.2'	'PS.lightreaction.photosystem I.PSI polypeptide subunits'	'moderately similar to ( 270) AT1G31330 | Symbols: PSAF | PSAF (photosystem I subunit F) | chr1:11215011-11215939 REVERSEmoderately similar to ( 311) PSAF_HORVU Photosystem I reaction center subunit III, chloroplast precursor (Light-harvesting complex I 17 kDa protein) (PSI-F) - Hordeum vulgare (Barley)moderately similar to ( 307) loc_os03g56670 12003.m34938 protein photosystem I reaction center …	0.05	0.3	4.2	0.1	0.15	0.2	0	0.15	0.1	0.3
GRMZM2G024150	'1.1.2.2'	'PS.lightreaction.photosystem I.PSI polypeptide subunits'	'moderately similar to ( 278) AT4G02770 | Symbols: PSAD-1 | PSAD-1 (photosystem I subunit D-1) | chr4:1229247-1229873 REVERSEmoderately similar to ( 293) PSAD_HORVU Photosystem I reaction center subunit II, chloroplast precursor (Photosystem I 20 kDa subunit) (PSI-D) - Hordeum vulgare (Barley)moderately similar to ( 286) loc_os08g44680 12008.m08440 protein photosystem I reaction center subunit II…	0	0	0.15	0.05	0	0	0	0	0	0.05
GRMZM2G026015	'1.1.2.2'	'PS.lightreaction.photosystem I.PSI polypeptide subunits'	'moderately similar to ( 261) AT4G12800 | Symbols: PSAL | PSAL (photosystem I subunit L) | chr4:7521469-7522493 FORWARDmoderately similar to ( 317) PSAL_HORVU Photosystem I reaction center subunit XI, chloroplast precursor (PSI-L) (PSI subunit V) - Hordeum vulgare (Barley)moderately similar to ( 336) loc_os12g23200 12012.m26900 protein photosystem I reaction center subunit XI, chloroplast precurs…	0.05	1.15	5.45	0.85	0.4	0.35	0	0	1.05	2.3
GRMZM2G028302	'1.1.2.2'	'PS.lightreaction.photosystem I.PSI polypeptide subunits'	'weakly similar to ( 104) AT2G46820 | Symbols: PTAC8, TMP14, PSAP, PSI-P | PSI-P (PHOTOSYSTEM I P SUBUNIT); DNA binding | chr2:19243729-19244870 FORWARDweakly similar to ( 155) loc_os10g39150 12010.m06686 protein thylakoid membrane phosphoprotein 14 kda, chloroplast precursor, putative, expressed seq=cds; coord=1:83431960..83433879:-1; parent_gene=GRMZM2G028302'	0.65	1.8	2.55	2.6	0.65	0.35	4.3	9.15	0.7	2.1
GRMZM2G080107	'1.1.2.2'	'PS.lightreaction.photosystem I.PSI polypeptide subunits'	'weakly similar to ( 161) AT5G64040 | Symbols: PSAN | PSAN; calmodulin binding | chr5:25628690-25629409 REVERSEweakly similar to ( 186) PSAN_MAIZE Photosystem I reaction center subunit N, chloroplast precursor (PSI-N) (Fragment) - Zea mays (Maize)weakly similar to ( 182) loc_os12g08770 12012.m04863 protein photosystem I reaction center subunit N, chloroplast precursor, putative, expressed seq=cds…	0.15	1.3	12.3	1.2	0.4	0.5	0.65	1.7	1	3.55
GRMZM2G085646	'1.1.2.2'	'PS.lightreaction.photosystem I.PSI polypeptide subunits'	'moderately similar to ( 270) AT1G31330 | Symbols: PSAF | PSAF (photosystem I subunit F) | chr1:11215011-11215939 REVERSEmoderately similar to ( 305) PSAF_HORVU Photosystem I reaction center subunit III, chloroplast precursor (Light-harvesting complex I 17 kDa protein) (PSI-F) - Hordeum vulgare (Barley)moderately similar to ( 307) loc_os03g56670 12003.m34938 protein photosystem I reaction center …	1.25	2	4.95	1.8	0.85	0.65	1.45	1.5	0.6	2.05
GRMZM2G094224	'1.1.2.2'	'PS.lightreaction.photosystem I.PSI polypeptide subunits'	'moderately similar to ( 249) AT4G12800 | Symbols: PSAL | PSAL (photosystem I subunit L) | chr4:7521469-7522493 FORWARDmoderately similar to ( 312) PSAL_HORVU Photosystem I reaction center subunit XI, chloroplast precursor (PSI-L) (PSI subunit V) - Hordeum vulgare (Barley)moderately similar to ( 330) loc_os12g23200 12012.m26900 protein photosystem I reaction center subunit XI, chloroplast precurs…	0.6	0.15	1.25	0.4	0.05	0.15	0.2	0.9	0.15	0.25
GRMZM2G096792	'1.1.2.2'	'PS.lightreaction.photosystem I.PSI polypeptide subunits'	'weakly similar to ( 167) ATCG01060 | Symbols: PSAC | Encodes the PsaC subunit of photosystem I. | chrC:117318-117563 REVERSEweakly similar to ( 175) PSAC_WHEAT Photosystem I iron-sulfur center (Photosystem I subunit VII) (9 kDa polypeptide) (PSI-C) (PsaC) - Triticum aestivum (Wheat)weakly similar to ( 177) loc_osp1g00920 11562.m00083 protein photosystem I subunit VII seq=cds; coord=2:172082867..…	0	0	0	0	0	0	0	0	0	0
GRMZM2G177770	'1.1.2.2'	'PS.lightreaction.photosystem I.PSI polypeptide subunits'	'very weakly similar to (82.0) AT1G52230 | Symbols: PSAH2, PSAH-2, PSI-H | PSAH2 (PHOTOSYSTEM I SUBUNIT H2) | chr1:19454902-19455508 FORWARDvery weakly similar to (87.0) PSAH_MAIZE Photosystem I reaction center subunit VI, chloroplast precursor (PSI-H) (Light-harvesting complex I 11 kDa protein) - Zea mays (Maize)very weakly similar to (82.8) loc_os05g48630 12005.m08934 protein expressed protein …	0	0	0	0	0	0	0	0	0	0
GRMZM2G302639	'1.1.2.2'	'PS.lightreaction.photosystem I.PSI polypeptide subunits'	'weakly similar to ( 130) loc_os01g55570 12001.m43202 protein thylakoid membrane phosphoprotein 14 kda, chloroplast precursor, putative, expressed seq=cds; coord=8:173408069..173410516:-1; parent_gene=GRMZM2G302639'	2.45	1.9	3.75	2.65	2.75	3.05	5.65	7.85	3.7	4.9
GRMZM2G329047	'1.1.2.2'	'PS.lightreaction.photosystem I.PSI polypeptide subunits'	'weakly similar to ( 174) AT1G55670 | Symbols: PSAG | PSAG (PHOTOSYSTEM I SUBUNIT G) | chr1:20802874-20803356 REVERSEweakly similar to ( 196) PSAG_HORVU Photosystem I reaction center subunit V, chloroplast precursor (PSI-G) (Photosystem I 9 kDa protein) - Hordeum vulgare (Barley)moderately similar to ( 202) loc_os09g30340 12009.m06185 protein photosystem I reaction center subunit V, chloroplast p…	0	0.05	0.15	0	0	0	0	0.05	0	0.05
GRMZM2G377855	'1.1.2.2'	'PS.lightreaction.photosystem I.PSI polypeptide subunits'	'weakly similar to ( 180) AT1G55670 | Symbols: PSAG | PSAG (PHOTOSYSTEM I SUBUNIT G) | chr1:20802874-20803356 REVERSEweakly similar to ( 195) PSAG_HORVU Photosystem I reaction center subunit V, chloroplast precursor (PSI-G) (Photosystem I 9 kDa protein) - Hordeum vulgare (Barley)moderately similar to ( 201) loc_os09g30340 12009.m06185 protein photosystem I reaction center subunit V, chloroplast p…	0.05	1.1	5.55	0.95	0.35	0.2	0.25	3.2	0.45	2.45
GRMZM2G451224	'1.1.2.2'	'PS.lightreaction.photosystem I.PSI polypeptide subunits'	'weakly similar to ( 127) AT3G16140 | Symbols: PSAH-1 | PSAH-1 (photosystem I subunit H-1) | chr3:5468670-5469415 REVERSEweakly similar to ( 166) PSAH_MAIZE Photosystem I reaction center subunit VI, chloroplast precursor (PSI-H) (Light-harvesting complex I 11 kDa protein) - Zea mays (Maize)weakly similar to ( 145) loc_os05g48630 12005.m08934 protein expressed protein seq=cds; coord=6:163973641..1…	0.15	0.5	4.65	0.95	0.3	0.4	0.1	0.55	0.5	1.95
GRMZM2G538198	'1.1.2.2'	'PS.lightreaction.photosystem I.PSI polypeptide subunits'	'very weakly similar to (93.6) ATCG01060 | Symbols: PSAC | Encodes the PsaC subunit of photosystem I. | chrC:117318-117563 REVERSEvery weakly similar to (91.7) PSAC_WHEAT Photosystem I iron-sulfur center (Photosystem I subunit VII) (9 kDa polypeptide) (PSI-C) (PsaC) - Triticum aestivum (Wheat)very weakly similar to (93.6) loc_osp1g00920 11562.m00083 protein photosystem I subunit VII seq=cds; coor…	0	0	0	0	0	0	0	0	0	0
GRMZM5G815553	'1.1.2.2'	'PS.lightreaction.photosystem I.PSI polypeptide subunits'	'weakly similar to ( 166) ATCG01060 | Symbols: PSAC | Encodes the PsaC subunit of photosystem I. | chrC:117318-117563 REVERSEweakly similar to ( 176) PSAC_MAIZE Photosystem I iron-sulfur center (Photosystem I subunit VII) (9 kDa polypeptide) (PSI-C) (PsaC) - Zea mays (Maize)weakly similar to ( 175) loc_osp1g00920 11562.m00083 protein photosystem I subunit VII seq=cds; coord=Pt:111760..112005:-1; …	0	0	0	0	0	0	0	0	0	0
GRMZM5G818058	'1.1.2.2'	'PS.lightreaction.photosystem I.PSI polypeptide subunits'	'very weakly similar to (85.5) AT2G46820 | Symbols: PTAC8, TMP14, PSAP, PSI-P | PSI-P (PHOTOSYSTEM I P SUBUNIT); DNA binding | chr2:19243729-19244870 FORWARDweakly similar to ( 105) loc_os07g28610 12007.m29162 protein thylakoid membrane phosphoprotein 14 kda, chloroplast precursor, putative, expressed seq=cds; coord=7:145179339..145181182:1; parent_gene=GRMZM5G818058'	13.5	6.05	17.75	13.4	11.9	11	14.3	25.7	12.75	14
GRMZM5G852325	'1.1.2.2'	'PS.lightreaction.photosystem I.PSI polypeptide subunits'	'weakly similar to ( 141) ATCG01060 | Symbols: PSAC | Encodes the PsaC subunit of photosystem I. | chrC:117318-117563 REVERSEweakly similar to ( 139) PSAC_WHEAT Photosystem I iron-sulfur center (Photosystem I subunit VII) (9 kDa polypeptide) (PSI-C) (PsaC) - Triticum aestivum (Wheat)weakly similar to ( 141) loc_osp1g00920 11562.m00083 protein photosystem I subunit VII seq=cds; coord=7:44728010..4…	0	0	0	0	0	0	0	0	0	0
GRMZM2G018664	'1.1.3'	'PS.lightreaction.cytochrome b6/f'	'highly similar to ( 654) ATMG00220 | Symbols: COB | Mitochondrial apocytochrome b (cob) gene encodes a subunit of the ubiquinol-cytochrome c oxidoreductase and is part of a 5 kb transcript. The transcript also contains a pseudogene for ribosomal protein S14 called RPS15 and a tRNA(Ser) gene. Both the Cob and RPS15 genes are edited in the transcript. | chrM:60235-61416 FORWARDhighly similar to ( …	0	0	0	0	0	0	0	0	0	0
GRMZM2G054687	'1.1.3'	'PS.lightreaction.cytochrome b6/f'	'moderately similar to ( 442) ATMG00220 | Symbols: COB | Mitochondrial apocytochrome b (cob) gene encodes a subunit of the ubiquinol-cytochrome c oxidoreductase and is part of a 5 kb transcript. The transcript also contains a pseudogene for ribosomal protein S14 called RPS15 and a tRNA(Ser) gene. Both the Cob and RPS15 genes are edited in the transcript. | chrM:60235-61416 FORWARDmoderately simil…	0	0	0	0	0	0	0	0	0	0
GRMZM2G112030	'1.1.3'	'PS.lightreaction.cytochrome b6/f'	'highly similar to ( 658) ATMG00220 | Symbols: COB | Mitochondrial apocytochrome b (cob) gene encodes a subunit of the ubiquinol-cytochrome c oxidoreductase and is part of a 5 kb transcript. The transcript also contains a pseudogene for ribosomal protein S14 called RPS15 and a tRNA(Ser) gene. Both the Cob and RPS15 genes are edited in the transcript. | chrM:60235-61416 FORWARDhighly similar to ( …	0	0	0	0	0	0	0	0	0	0
GRMZM2G164558	'1.1.3'	'PS.lightreaction.cytochrome b6/f'	'weakly similar to ( 117) loc_os03g55720 12003.m10483 protein plastoquinol-plastocyanin reductase, putative, expressed seq=cds; coord=1:280705259..280706294:1; parent_gene=GRMZM2G164558'	0.15	0.3	1.9	0.35	0.25	0.05	0.4	0.5	0.2	1
GRMZM2G167766	'1.1.3'	'PS.lightreaction.cytochrome b6/f'	'weakly similar to ( 170) AT5G36120 | Symbols: CCB3 | CCB3 (COFACTOR ASSEMBLY, COMPLEX C (B6F),) | chr5:14198679-14199203 REVERSEmoderately similar to ( 201) loc_os01g73540 12001.m13381 protein YGGT family protein, expressed seq=cds; coord=8:156882020..156883032:1; parent_gene=GRMZM2G167766'	0.35	0.75	2.05	0.4	0.35	0.15	0.55	1.05	0.25	1.5
GRMZM2G314427	'1.1.3'	'PS.lightreaction.cytochrome b6/f'	'highly similar to ( 658) ATMG00220 | Symbols: COB | Mitochondrial apocytochrome b (cob) gene encodes a subunit of the ubiquinol-cytochrome c oxidoreductase and is part of a 5 kb transcript. The transcript also contains a pseudogene for ribosomal protein S14 called RPS15 and a tRNA(Ser) gene. Both the Cob and RPS15 genes are edited in the transcript. | chrM:60235-61416 FORWARDhighly similar to ( …	0	0	0	0	0	0	0	0	0	0
GRMZM5G884707	'1.1.3'	'PS.lightreaction.cytochrome b6/f'	'highly similar to ( 658) ATMG00220 | Symbols: COB | Mitochondrial apocytochrome b (cob) gene encodes a subunit of the ubiquinol-cytochrome c oxidoreductase and is part of a 5 kb transcript. The transcript also contains a pseudogene for ribosomal protein S14 called RPS15 and a tRNA(Ser) gene. Both the Cob and RPS15 genes are edited in the transcript. | chrM:60235-61416 FORWARDhighly similar to ( …	0	0	0	0	0	0	0	0	0	0
GRMZM2G038365	'1.1.3.1'	'PS.lightreaction.cytochrome b6/f.iron sulfur subunit'	'moderately similar to ( 306) AT4G03280 | Symbols: PETC, PGR1 | PETC (PHOTOSYNTHETIC ELECTRON TRANSFER C); electron transporter, transferring electrons from cytochrome b6/f complex of photosystem II | chr4:1440462-1441717 FORWARDmoderately similar to ( 389) UCRIA_ORYSA Cytochrome b6-f complex iron-sulfur subunit, chloroplast precursor (EC 1.10.99.1) (Rieske iron-sulfur protein) (Plastohydroquinon…	0.1	0.2	0.95	0.15	0.1	0.05	0.1	0.15	0.15	0.2
GRMZM2G162748	'1.1.3.1'	'PS.lightreaction.cytochrome b6/f.iron sulfur subunit'	'moderately similar to ( 315) AT4G03280 | Symbols: PETC, PGR1 | PETC (PHOTOSYNTHETIC ELECTRON TRANSFER C); electron transporter, transferring electrons from cytochrome b6/f complex of photosystem II | chr4:1440462-1441717 FORWARDmoderately similar to ( 397) UCRIA_ORYSA Cytochrome b6-f complex iron-sulfur subunit, chloroplast precursor (EC 1.10.99.1) (Rieske iron-sulfur protein) (Plastohydroquinon…	0.45	1.15	3.75	0.95	0.8	0.25	1.35	1.65	0.4	2.8	iron-sulfur protein2
GRMZM2G103103	'1.1.3.2'	'PS.lightreaction.cytochrome b6/f.subunit 4 (PETD)'	'weakly similar to ( 192) ATCG00730 | Symbols: PETD | A chloroplast gene encoding subunit IV of the cytochrome b6/f complex | chrC:76481-77672 FORWARDweakly similar to ( 194) PETD_WHEAT Cytochrome b6-f complex subunit 4 (17 kDa polypeptide) - Triticum aestivum (Wheat)weakly similar to ( 194) loc_os01g57941 12001.m150407 protein cytochrome b6-f complex subunit 4, putative, expressed seq=cds; coord…	0	0	0	0	0	0	0	0	0	0
GRMZM2G427557	'1.1.3.2'	'PS.lightreaction.cytochrome b6/f.subunit 4 (PETD)'	'moderately similar to ( 319) ATCG00730 | Symbols: PETD | A chloroplast gene encoding subunit IV of the cytochrome b6/f complex | chrC:76481-77672 FORWARDmoderately similar to ( 323) PETD_SACOF Cytochrome b6-f complex subunit 4 (17 kDa polypeptide) - Saccharum officinarum (Sugarcane)moderately similar to ( 356) loc_os01g57941 12001.m150407 protein cytochrome b6-f complex subunit 4, putative, expr…	0	0	0	0	0	0	0	0	0	0
GRMZM5G884960	'1.1.3.2'	'PS.lightreaction.cytochrome b6/f.subunit 4 (PETD)'	'moderately similar to ( 319) ATCG00730 | Symbols: PETD | A chloroplast gene encoding subunit IV of the cytochrome b6/f complex | chrC:76481-77672 FORWARDmoderately similar to ( 323) PETD_SACOF Cytochrome b6-f complex subunit 4 (17 kDa polypeptide) - Saccharum officinarum (Sugarcane)moderately similar to ( 356) loc_os01g57941 12001.m150407 protein cytochrome b6-f complex subunit 4, putative, expr…	0	0	0	0	0	0	0	0	0	0
GRMZM2G060898	'1.1.3.3'	'PS.lightreaction.cytochrome b6/f.cytochrome b6 (CYB6)'	'moderately similar to ( 417) ATCG00720 | Symbols: PETB | Encodes the cytochrome b(6) subunit of the cytochrome b6f complex. | chrC:74841-76292 FORWARDmoderately similar to ( 425) CYB6_SACOF Cytochrome b6 - Saccharum officinarum (Sugarcane)moderately similar to ( 452) loc_osp1g00640 11562.m00055 protein cytochrome b6 seq=cds; coord=4:208240395..208243917:1; parent_gene=GRMZM2G060898'	0	0	0	0	0	0	0	0	0	0
GRMZM2G463640	'1.1.3.3'	'PS.lightreaction.cytochrome b6/f.cytochrome b6 (CYB6)'	'moderately similar to ( 426) ATCG00720 | Symbols: PETB | Encodes the cytochrome b(6) subunit of the cytochrome b6f complex. | chrC:74841-76292 FORWARDmoderately similar to ( 434) CYB6_SACOF Cytochrome b6 - Saccharum officinarum (Sugarcane)moderately similar to ( 433) loc_osp1g00640 11562.m00055 protein cytochrome b6 seq=cds; coord=5:21501641..21503463:-1; parent_gene=GRMZM2G463640'	0	0	0	0.05	0	0	0	0	0	0
GRMZM5G800780	'1.1.3.3'	'PS.lightreaction.cytochrome b6/f.cytochrome b6 (CYB6)'	'moderately similar to ( 426) ATCG00720 | Symbols: PETB | Encodes the cytochrome b(6) subunit of the cytochrome b6f complex. | chrC:74841-76292 FORWARDmoderately similar to ( 434) CYB6_SACOF Cytochrome b6 - Saccharum officinarum (Sugarcane)moderately similar to ( 433) loc_osp1g00640 11562.m00055 protein cytochrome b6 seq=cds; coord=Pt:73842..74543:1; parent_gene=GRMZM5G800780'	0	0	0	0	0	0	0	0	0	0
GRMZM2G413972	'1.1.3.4'	'PS.lightreaction.cytochrome b6/f.apocytochrome f (CYF)'	'very weakly similar to (87.4) ATCG00540 | Symbols: PETA | Encodes cytochrome f apoprotein; involved in photosynthetic electron transport chain; encoded by the chloroplast genome and is transcriptionally repressed by a nuclear gene HCF2. | chrC:61657-62619 FORWARDvery weakly similar to (91.7) CYF_SACOF Apocytochrome f precursor - Saccharum officinarum (Sugarcane)very weakly similar to (91.7) loc_…	0	0	0	0	0	0	0	0	0	0
GRMZM2G448174	'1.1.3.4'	'PS.lightreaction.cytochrome b6/f.apocytochrome f (CYF)'	'highly similar to ( 572) ATCG00540 | Symbols: PETA | Encodes cytochrome f apoprotein; involved in photosynthetic electron transport chain; encoded by the chloroplast genome and is transcriptionally repressed by a nuclear gene HCF2. | chrC:61657-62619 FORWARDhighly similar to ( 635) CYF_SACOF Apocytochrome f precursor - Saccharum officinarum (Sugarcane)highly similar to ( 627) loc_osp1g00480 1156…	0.15	0	0	0.15	0.1	0.15	0.05	0.05	0.05	0.05
GRMZM2G010349	'1.1.30'	'PS.lightreaction.state transition'	'moderately similar to ( 345) AT1G68830 | Symbols: STN7 | STN7 (Stt7 homolog STN7); kinase/ protein kinase | chr1:25872654-25875473 REVERSEweakly similar to ( 147) STT7_CHLRE Serine/threonine-protein kinase stt7, chloroplast precursor (EC 2.7.11.1) - Chlamydomonas reinhardtiimoderately similar to ( 472) loc_os05g47560 12005.m08829 protein serine/threonine-protein kinase SNT7, chloroplast precurso…	26.9	21.4	22.15	19.5	11.7	12.5	10.6	14.75	19.15	7.85
GRMZM2G131575	'1.1.4'	'PS.lightreaction.ATP synthase'	'moderately similar to ( 242) loc_os03g52660 12003.m10240 protein ATP synthase F1, delta subunit family protein, expressed seq=cds; coord=1:273785643..273787304:1; parent_gene=GRMZM2G131575'	0.15	0.35	0.6	0	0.05	0	0	0.2	0.05	0.1
GRMZM2G179146	'1.1.4'	'PS.lightreaction.ATP synthase'	'moderately similar to ( 362) AT2G31040 | Symbols: | ATP synthase protein I -related | chr2:13209094-13211012 REVERSEhighly similar to ( 615) loc_os01g48300 12001.m43139 protein expressed protein seq=cds; coord=8:150038071..150046354:-1; parent_gene=GRMZM2G179146'	2.35	2.1	2.45	2.1	2.15	2.8	1.9	3.15	2.2	1.95
GRMZM2G401040	'1.1.4'	'PS.lightreaction.ATP synthase'	'moderately similar to ( 214) loc_os03g52660 12003.m10240 protein ATP synthase F1, delta subunit family protein, expressed seq=cds; coord=5:8334393..8335549:1; parent_gene=GRMZM2G401040'	1.35	0.45	1.5	1.5	1.2	0.55	1.4	1.45	2.05	1.15
GRMZM5G825759	'1.1.4'	'PS.lightreaction.ATP synthase'	'weakly similar to ( 150) AT4G32260 | Symbols: | ATP synthase family | chr4:15573859-15574586 REVERSEweakly similar to ( 152) ATPX_SPIOL ATP synthase B' chain, chloroplast precursor (EC 3.6.3.14) (Subunit II) - Spinacia oleracea (Spinach)moderately similar to ( 204) loc_os03g17070 12003.m07139 protein ATP synthase B chain, chloroplast precursor, putative, expressed seq=cds; coord=9:139195465..139…	1.5	1.3	1.9	1.95	1.2	0.7	1.5	2.45	0.85	1.4
GRMZM2G000223	'1.1.4.2'	'PS.lightreaction.ATP synthase.beta subunit'	'very weakly similar to (84.3) ATPB_SACOF ATP synthase subunit beta (EC 3.6.3.14) (ATPase subunit beta) (ATP synthase F1 sector subunit beta) - Saccharum officinarum (Sugarcane)very weakly similar to (81.6) loc_os12g10570 12012.m05039 protein ATP synthase beta chain, putative seq=cds; coord=10:128588177..128588596:-1; parent_gene=GRMZM2G000223'	0	0	0	0	0	0	0	0	0.05	0
GRMZM2G063271	'1.1.4.2'	'PS.lightreaction.ATP synthase.beta subunit'	'moderately similar to ( 291) ATCG00480 | Symbols: ATPB | chloroplast-encoded gene for beta subunit of ATP synthase | chrC:52660-54156 REVERSEmoderately similar to ( 340) ATPB_MAIZE ATP synthase subunit beta (EC 3.6.3.14) (ATPase subunit beta) (ATP synthase F1 sector subunit beta) - Zea mays (Maize)moderately similar to ( 329) loc_os10g21270 12010.m05145 protein ATP synthase beta chain, putative,…	0	0	0	0	0	0	0	0	0	0
GRMZM2G319074	'1.1.4.2'	'PS.lightreaction.ATP synthase.beta subunit'	'weakly similar to ( 125) ATCG00480 | Symbols: ATPB | chloroplast-encoded gene for beta subunit of ATP synthase | chrC:52660-54156 REVERSEweakly similar to ( 157) ATPB_MAIZE ATP synthase subunit beta (EC 3.6.3.14) (ATPase subunit beta) (ATP synthase F1 sector subunit beta) - Zea mays (Maize)weakly similar to ( 148) loc_osp1g00410 11562.m00030 protein ATP synthase CF1 beta chain seq=cds; coord=1:2…	0	0	0	0	0	0	0	0	0	0
GRMZM2G326945	'1.1.4.3'	'PS.lightreaction.ATP synthase.epsilon chain'	'very weakly similar to (90.1) ATCG00470 | Symbols: ATPE | ATPase epsilon subunit | chrC:52265-52663 REVERSEweakly similar to ( 131) ATPE_SACOF ATP synthase epsilon chain (EC 3.6.3.14) (ATP synthase F1 sector epsilon subunit) - Saccharum officinarum (Sugarcane)weakly similar to ( 127) loc_os06g39740 12006.m08511 protein ATP synthase beta chain, putative seq=cds; coord=8:45880065..45881097:-1; par…	0	0	0	0	0	0	0	0	0	0
GRMZM2G048907	'1.1.4.4'	'PS.lightreaction.ATP synthase.gamma chain'	'moderately similar to ( 469) AT4G04640 | Symbols: ATPC1 | ATPC1; enzyme regulator | chr4:2350761-2351882 REVERSEhighly similar to ( 589) ATPG_MAIZE ATP synthase subunit gamma, chloroplast precursor (EC 3.6.3.14) [Contains: Inceptin] - Zea mays (Maize)highly similar to ( 561) loc_os07g32880 12007.m07550 protein ATP synthase gamma chain, chloroplast precursor, putative, expressed seq=cds; coord=7:…	4.95	4.2	6.8	6.15	5.35	4.7	7.1	7.2	4.8	6.3
GRMZM2G336839	'1.1.4.4'	'PS.lightreaction.ATP synthase.gamma chain'	'weakly similar to ( 138) AT4G04640 | Symbols: ATPC1 | ATPC1; enzyme regulator | chr4:2350761-2351882 REVERSEweakly similar to ( 172) ATPG_MAIZE ATP synthase subunit gamma, chloroplast precursor (EC 3.6.3.14) [Contains: Inceptin] - Zea mays (Maize)weakly similar to ( 169) loc_os07g32880 12007.m07550 protein ATP synthase gamma chain, chloroplast precursor, putative, expressed seq=cds; coord=2:2027…	0	0	0	0	0	0	0	0	0	0
GRMZM2G429727	'1.1.4.4'	'PS.lightreaction.ATP synthase.gamma chain'	'weakly similar to ( 113) AT4G04640 | Symbols: ATPC1 | ATPC1; enzyme regulator | chr4:2350761-2351882 REVERSEweakly similar to ( 136) ATPG_MAIZE ATP synthase subunit gamma, chloroplast precursor (EC 3.6.3.14) [Contains: Inceptin] - Zea mays (Maize)weakly similar to ( 134) loc_os07g32880 12007.m07550 protein ATP synthase gamma chain, chloroplast precursor, putative, expressed seq=cds; coord=2:2028…	0	0	0	0	0	0	0	0	0	0
GRMZM2G041456	'1.1.4.5'	'PS.lightreaction.ATP synthase.subunit C'	'weakly similar to ( 127) ATCG00140 | Symbols: ATPH | ATPase III subunit | chrC:13262-13507 REVERSEweakly similar to ( 127) ATPH_WHEAT ATP synthase C chain (EC 3.6.3.14) (Lipid-binding protein) (ATPase subunit III) - Triticum aestivum (Wheat)weakly similar to ( 127) loc_osp1g00290 11562.m00018 protein ATP synthase CF0 C chain seq=cds; coord=1:130611115..130611588:-1; parent_gene=GRMZM2G041456'	0	0	0	0	0	0	0	0	0	0
GRMZM2G391831	'1.1.4.5'	'PS.lightreaction.ATP synthase.subunit C'	'weakly similar to ( 111) ATCG00140 | Symbols: ATPH | ATPase III subunit | chrC:13262-13507 REVERSEweakly similar to ( 112) ATPH_WHEAT ATP synthase C chain (EC 3.6.3.14) (Lipid-binding protein) (ATPase subunit III) - Triticum aestivum (Wheat)weakly similar to ( 112) loc_osp1g00290 11562.m00018 protein ATP synthase CF0 C chain seq=cds; coord=5:163651024..163654011:-1; parent_gene=GRMZM2G391831'	0.05	0	0	0	0	0	0	0	0	0
GRMZM2G458118	'1.1.4.5'	'PS.lightreaction.ATP synthase.subunit C'	'weakly similar to ( 148) ATCG00140 | Symbols: ATPH | ATPase III subunit | chrC:13262-13507 REVERSEweakly similar to ( 149) ATPH_WHEAT ATP synthase C chain (EC 3.6.3.14) (Lipid-binding protein) (ATPase subunit III) - Triticum aestivum (Wheat)weakly similar to ( 149) loc_osp1g00290 11562.m00018 protein ATP synthase CF0 C chain seq=cds; coord=9:60617708..60620276:1; parent_gene=GRMZM2G458118'	0	0	0	0	0	0	0	0	0	0
GRMZM2G114952	'1.1.4.6'	'PS.lightreaction.ATP synthase.chloroplastic subunit a'	'very weakly similar to (82.0) ATPI_WHEAT Chloroplast ATP synthase a chain precursor (EC 3.6.3.14) (ATPase subunit IV) - Triticum aestivum (Wheat)very weakly similar to (82.0) loc_os10g38292 12010.m50433 protein chloroplast ATP synthase a chain precursor, putative, expressed seq=cds; coord=4:25556279..25557761:-1; parent_gene=GRMZM2G114952'	0	0	0	0	0	0	0	0	0	0
GRMZM5G875287	'1.1.4.6'	'PS.lightreaction.ATP synthase.chloroplastic subunit a'	'moderately similar to ( 397) ATCG00150 | Symbols: ATPI | Encodes a subunit of ATPase complex CF0, which is a proton channel that supplies the proton motive force to drive ATP synthesis by CF1 portion of the complex. | chrC:14021-14770 REVERSEmoderately similar to ( 432) ATPI_SACOF Chloroplast ATP synthase a chain precursor (EC 3.6.3.14) (ATPase subunit IV) - Saccharum officinarum (Sugarcane)mode…	0	0	0	0	0	0	0	0	0	0
GRMZM2G025171	'1.1.4.7'	'PS.lightreaction.ATP synthase.delta chain'	'weakly similar to ( 177) AT4G09650 | Symbols: ATPD | ATPD (ATP SYNTHASE DELTA-SUBUNIT GENE); hydrogen ion transporting ATP synthase, rotational mechanism / proton-transporting ATPase, rotational mechanism | chr4:6100799-6101503 FORWARDmoderately similar to ( 273) ATPD_SORBI ATP synthase delta chain, chloroplast precursor (EC 3.6.3.14) - Sorghum bicolor (Sorghum) (Sorghum vulgare)moderately simil…	0.2	0.45	1.2	0.2	0.15	0.1	0.4	0.5	0.15	0.8
GRMZM5G862663	'1.1.4.7'	'PS.lightreaction.ATP synthase.delta chain'	'weakly similar to ( 107) AT4G09650 | Symbols: ATPD | ATPD (ATP SYNTHASE DELTA-SUBUNIT GENE); hydrogen ion transporting ATP synthase, rotational mechanism / proton-transporting ATPase, rotational mechanism | chr4:6100799-6101503 FORWARDweakly similar to ( 173) ATPD_SORBI ATP synthase delta chain, chloroplast precursor (EC 3.6.3.14) - Sorghum bicolor (Sorghum) (Sorghum vulgare)weakly similar to ( …	4.65	3.05	5.2	4.95	3.8	6.35	7.4	8.95	3.85	7.25
AC203966.5_FG002	'1.1.40'	'PS.lightreaction.cyclic electron flow-chlororespiration'	'moderately similar to ( 235) AT4G22890 | Symbols: PGR5-LIKE A | PGR5-LIKE A | chr4:12007157-12009175 FORWARDmoderately similar to ( 261) loc_os03g64020 12003.m11268 protein expressed protein seq=cds; coord=1:299638957..299642749:-1; parent_gene=AC203966.5_FG002'	0.15	0.05	0.15	0.15	0.15	0.05	0.1	0.1	0.15	0.1
GRMZM2G012119	'1.1.40'	'PS.lightreaction.cyclic electron flow-chlororespiration'	'moderately similar to ( 300) AT3G15840 | Symbols: PIFI | PIFI (post-illumination chlorophyll fluorescence increase) | chr3:5356782-5358070 REVERSEmoderately similar to ( 397) loc_os03g38950 12003.m35300 protein expressed protein seq=cds; coord=1:246546725..246549167:1; parent_gene=GRMZM2G012119'	191.9	203.85	174	203.7	187.05	208.6	208.1	189.95	178.5	216
GRMZM2G016261	'1.1.40'	'PS.lightreaction.cyclic electron flow-chlororespiration'	'weakly similar to ( 167) ATCG01250 | Symbols: NDHB.2 | NADH dehydrogenase ND2 | chrC:141854-143708 FORWARDmoderately similar to ( 383) NU2C_SACOF NAD(P)H-quinone oxidoreductase chain 2, chloroplast (EC 1.6.5.-) (NAD(P)H dehydrogenase, chain 2) (NADH-plastoquinone oxidoreductase chain 2) - Saccharum officinarum (Sugarcane)moderately similar to ( 382) loc_osp1g01060 11562.m00096 protein NADH dehyd…	0.05	0.05	0	0.15	0	0	0	0	0	0
GRMZM2G016590	'1.1.40'	'PS.lightreaction.cyclic electron flow-chlororespiration'	'very weakly similar to (96.3) ATCG01250 | Symbols: NDHB.2 | NADH dehydrogenase ND2 | chrC:141854-143708 FORWARDweakly similar to ( 105) NU2C_WHEAT NAD(P)H-quinone oxidoreductase chain 2, chloroplast (EC 1.6.5.-) (NAD(P)H dehydrogenase, chain 2) (NADH-plastoquinone oxidoreductase chain 2) - Triticum aestivum (Wheat)weakly similar to ( 105) loc_osp1g01060 11562.m00096 protein NADH dehydrogenase su…	0	0	0	0	0	0	0	0	0	0
GRMZM2G017045	'1.1.40'	'PS.lightreaction.cyclic electron flow-chlororespiration'	'weakly similar to ( 151) AT2G05620 | Symbols: PGR5 | PGR5 (proton gradient regulation 5); electron carrier | chr2:2081204-2081687 REVERSEweakly similar to ( 176) loc_os08g45190 12008.m08489 protein PGR5, putative, expressed seq=cds; coord=1:201625281..201626321:-1; parent_gene=GRMZM2G017045'	0.5	0.35	0.9	0.35	0.1	0.05	0.25	0.2	0.05	0.3
GRMZM2G075144	'1.1.40'	'PS.lightreaction.cyclic electron flow-chlororespiration'	'moderately similar to ( 266) ATCG01250 | Symbols: NDHB.2 | NADH dehydrogenase ND2 | chrC:141854-143708 FORWARDmoderately similar to ( 276) NU2C_SACOF NAD(P)H-quinone oxidoreductase chain 2, chloroplast (EC 1.6.5.-) (NAD(P)H dehydrogenase, chain 2) (NADH-plastoquinone oxidoreductase chain 2) - Saccharum officinarum (Sugarcane)moderately similar to ( 296) loc_os02g24580 12002.m07605 protein NAD(P)…	0	0	0	0	0	0	0	0	0	0
GRMZM2G086763	'1.1.40'	'PS.lightreaction.cyclic electron flow-chlororespiration'	'moderately similar to ( 292) AT3G15840 | Symbols: PIFI | PIFI (post-illumination chlorophyll fluorescence increase) | chr3:5356782-5358070 REVERSEmoderately similar to ( 386) loc_os03g38950 12003.m35300 protein expressed protein seq=cds; coord=5:19460081..19462475:-1; parent_gene=GRMZM2G086763'	1031.45	1237.3	666.9	905.7	383	382.2	381.8	324.1	472.5	287.8
GRMZM2G121494	'1.1.40'	'PS.lightreaction.cyclic electron flow-chlororespiration'	'very weakly similar to (95.1) loc_os08g45190 12008.m08489 protein PGR5, putative, expressed seq=cds; coord=4:48158769..48159739:-1; parent_gene=GRMZM2G121494'	0	0	0	0	0	0	0	0	0	0
GRMZM2G134325	'1.1.40'	'PS.lightreaction.cyclic electron flow-chlororespiration'	'very weakly similar to (81.6) ATCG01070 | Symbols: NDHE | NADH dehydrogenase ND4L | chrC:117804-118109 REVERSEweakly similar to ( 110) NU4LC_SACOF NAD(P)H-quinone oxidoreductase chain 4L, chloroplast (EC 1.6.5.-) (NAD(P)H dehydrogenase, chain 4L) (NADH-plastoquinone oxidoreductase chain 4L) - Saccharum officinarum (Sugarcane)weakly similar to ( 110) loc_osp1g00930 11562.m00084 protein NADH dehyd…	0	0	0	0	0	0	0	0	0	0.05
GRMZM2G137648	'1.1.40'	'PS.lightreaction.cyclic electron flow-chlororespiration'	'highly similar to ( 769) ATCG01010 | Symbols: NDHF | Chloroplast encoded NADH dehydrogenase unit. | chrC:110398-112638 REVERSEnearly identical (1165) NU5C_MAIZE NAD(P)H-quinone oxidoreductase chain 5, chloroplast (EC 1.6.5.-) (NAD(P)H dehydrogenase, chain 5) (NADH-plastoquinone oxidoreductase chain 5) - Zea mays (Maize)nearly identical (1019) loc_osp1g00880 11562.m00079 protein NADH dehydrogenas…	0	0	0	0	0	0	0	0	0	0
GRMZM2G176216	'1.1.40'	'PS.lightreaction.cyclic electron flow-chlororespiration'	'highly similar to ( 912) ATCG01010 | Symbols: NDHF | Chloroplast encoded NADH dehydrogenase unit. | chrC:110398-112638 REVERSEnearly identical (1362) NU5C_MAIZE NAD(P)H-quinone oxidoreductase chain 5, chloroplast (EC 1.6.5.-) (NAD(P)H dehydrogenase, chain 5) (NADH-plastoquinone oxidoreductase chain 5) - Zea mays (Maize)nearly identical (1213) loc_osp1g00880 11562.m00079 protein NADH dehydrogenas…	0	0	0	0	0	0	0	0	0	0
GRMZM2G335564	'1.1.40'	'PS.lightreaction.cyclic electron flow-chlororespiration'	'highly similar to ( 618) ATCG01110 | Symbols: NDHH | Encodes the 49KDa plastid NAD(P)H dehydrogenase subunit H protein. Its transcription is regulated by an ndhF-specific plastid sigma factor, SIG4. | chrC:122011-123192 REVERSEhighly similar to ( 692) NDHH_MAIZE NAD(P)H-quinone oxidoreductase chain H, chloroplast (EC 1.6.5.-) (NAD(P)H dehydrogenase, chain H) (NADH-plastoquinone oxidoreductase 49…	0	0	0	0	0	0	0	0	0	0
GRMZM2G354804	'1.1.40'	'PS.lightreaction.cyclic electron flow-chlororespiration'	'highly similar to ( 714) ATCG01110 | Symbols: NDHH | Encodes the 49KDa plastid NAD(P)H dehydrogenase subunit H protein. Its transcription is regulated by an ndhF-specific plastid sigma factor, SIG4. | chrC:122011-123192 REVERSEhighly similar to ( 804) NDHH_MAIZE NAD(P)H-quinone oxidoreductase chain H, chloroplast (EC 1.6.5.-) (NAD(P)H dehydrogenase, chain H) (NADH-plastoquinone oxidoreductase 49…	0	0	0	0	0	0	0	0	0	0
GRMZM2G358205	'1.1.40'	'PS.lightreaction.cyclic electron flow-chlororespiration'	'highly similar to ( 778) ATCG01010 | Symbols: NDHF | Chloroplast encoded NADH dehydrogenase unit. | chrC:110398-112638 REVERSEnearly identical (1151) NU5C_MAIZE NAD(P)H-quinone oxidoreductase chain 5, chloroplast (EC 1.6.5.-) (NAD(P)H dehydrogenase, chain 5) (NADH-plastoquinone oxidoreductase chain 5) - Zea mays (Maize)nearly identical (1023) loc_osp1g00880 11562.m00079 protein NADH dehydrogenas…	0	0	0	0	0	0	0	0	0	0
GRMZM2G364366	'1.1.40'	'PS.lightreaction.cyclic electron flow-chlororespiration'	'very weakly similar to (91.3) NU4LC_WHEAT NAD(P)H-quinone oxidoreductase chain 4L, chloroplast (EC 1.6.5.-) (NAD(P)H dehydrogenase, chain 4L) (NADH-plastoquinone oxidoreductase chain 4L) - Triticum aestivum (Wheat)very weakly similar to (91.3) loc_osp1g00930 11562.m00084 protein NADH dehydrogenase subunit 4L seq=cds; coord=7:44728264..44729023:-1; parent_gene=GRMZM2G364366'	0	0	0	0	0	0	0	0	0	0
GRMZM2G383052	'1.1.40'	'PS.lightreaction.cyclic electron flow-chlororespiration'	'moderately similar to ( 266) ATCG01250 | Symbols: NDHB.2 | NADH dehydrogenase ND2 | chrC:141854-143708 FORWARDmoderately similar to ( 493) NU2C_SACOF NAD(P)H-quinone oxidoreductase chain 2, chloroplast (EC 1.6.5.-) (NAD(P)H dehydrogenase, chain 2) (NADH-plastoquinone oxidoreductase chain 2) - Saccharum officinarum (Sugarcane)moderately similar to ( 490) loc_osp1g01060 11562.m00096 protein NADH d…	0	0	0	0	0	0	0	0	0	0
GRMZM2G405584	'1.1.40'	'PS.lightreaction.cyclic electron flow-chlororespiration'	'highly similar to ( 915) ATCG01010 | Symbols: NDHF | Chloroplast encoded NADH dehydrogenase unit. | chrC:110398-112638 REVERSEnearly identical (1365) NU5C_MAIZE NAD(P)H-quinone oxidoreductase chain 5, chloroplast (EC 1.6.5.-) (NAD(P)H dehydrogenase, chain 5) (NADH-plastoquinone oxidoreductase chain 5) - Zea mays (Maize)nearly identical (1217) loc_osp1g00880 11562.m00079 protein NADH dehydrogenas…	0	0	0	0	0	0	0	0	0	0
GRMZM2G450705	'1.1.40'	'PS.lightreaction.cyclic electron flow-chlororespiration'	'highly similar to ( 639) ATCG01250 | Symbols: NDHB.2 | NADH dehydrogenase ND2 | chrC:141854-143708 FORWARDhighly similar to ( 887) NU2C_SACOF NAD(P)H-quinone oxidoreductase chain 2, chloroplast (EC 1.6.5.-) (NAD(P)H dehydrogenase, chain 2) (NADH-plastoquinone oxidoreductase chain 2) - Saccharum officinarum (Sugarcane)highly similar to ( 881) loc_osp1g01060 11562.m00096 protein NADH dehydrogenase…	0.15	0	0	0.1	0	0.05	0.1	0	0	0
GRMZM2G583032	'1.1.40'	'PS.lightreaction.cyclic electron flow-chlororespiration'	'very weakly similar to (88.6) NU3C_SACOF NAD(P)H-quinone oxidoreductase chain 3, chloroplast (EC 1.6.5.-) (NAD(P)H dehydrogenase, chain 3) (NADH-plastoquinone oxidoreductase chain 3) - Saccharum officinarum (Sugarcane)very weakly similar to (80.9) loc_osp1g00390 11562.m00028 protein NADH dehydrogenase subunit 3 seq=cds; coord=9:57624095..57624482:1; parent_gene=GRMZM2G583032'	0	0	0	0	0	0	0	0	0	0
GRMZM5G800101	'1.1.40'	'PS.lightreaction.cyclic electron flow-chlororespiration'	'highly similar to ( 639) ATCG01250 | Symbols: NDHB.2 | NADH dehydrogenase ND2 | chrC:141854-143708 FORWARDhighly similar to ( 887) NU2C_SACOF NAD(P)H-quinone oxidoreductase chain 2, chloroplast (EC 1.6.5.-) (NAD(P)H dehydrogenase, chain 2) (NADH-plastoquinone oxidoreductase chain 2) - Saccharum officinarum (Sugarcane)highly similar to ( 881) loc_osp1g01060 11562.m00096 protein NADH dehydrogenase…	0	0	0	0	0	0	0	0	0	0
GRMZM5G810298	'1.1.40'	'PS.lightreaction.cyclic electron flow-chlororespiration'	'highly similar to ( 639) ATCG01250 | Symbols: NDHB.2 | NADH dehydrogenase ND2 | chrC:141854-143708 FORWARDhighly similar to ( 887) NU2C_SACOF NAD(P)H-quinone oxidoreductase chain 2, chloroplast (EC 1.6.5.-) (NAD(P)H dehydrogenase, chain 2) (NADH-plastoquinone oxidoreductase chain 2) - Saccharum officinarum (Sugarcane)highly similar to ( 881) loc_osp1g01060 11562.m00096 protein NADH dehydrogenase…	0	0	0	0	0	0	0	0	0	0
GRMZM5G834128	'1.1.40'	'PS.lightreaction.cyclic electron flow-chlororespiration'	'highly similar to ( 861) ATMG00665 | Symbols: NAD5B, NAD5.2, NAD5 | Mitochondrial NADH dehydrogenase subunit 5. The gene is trans-spliced from three different pre-cursors, NAD5a, NAD5b and NAD5c. | chrM:190740-190761 REVERSEhighly similar to ( 924) NU5M_WHEAT NADH-ubiquinone oxidoreductase chain 5 (EC 1.6.5.3) (NADH dehydrogenase subunit 5) - Triticum aestivum (Wheat)moderately similar to ( 336)…	0.2	0.15	0.1	0.2	0.15	0.25	0.05	0.1	0.15	0.1
GRMZM5G835775	'1.1.40'	'PS.lightreaction.cyclic electron flow-chlororespiration'	'weakly similar to ( 109) NU4LC_MAIZE NAD(P)H-quinone oxidoreductase chain 4L, chloroplast (EC 1.6.5.-) (NAD(P)H dehydrogenase, chain 4L) (NADH-plastoquinone oxidoreductase chain 4L) - Zea mays (Maize)weakly similar to ( 107) loc_osp1g00930 11562.m00084 protein NADH dehydrogenase subunit 4L seq=cds; coord=Pt:112473..112778:-1; parent_gene=GRMZM5G835775'	0	0	0	0	0	0	0	0	0	0
GRMZM5G853723	'1.1.40'	'PS.lightreaction.cyclic electron flow-chlororespiration'	'highly similar to ( 712) ATCG01110 | Symbols: NDHH | Encodes the 49KDa plastid NAD(P)H dehydrogenase subunit H protein. Its transcription is regulated by an ndhF-specific plastid sigma factor, SIG4. | chrC:122011-123192 REVERSEhighly similar to ( 805) NDHH_MAIZE NAD(P)H-quinone oxidoreductase chain H, chloroplast (EC 1.6.5.-) (NAD(P)H dehydrogenase, chain H) (NADH-plastoquinone oxidoreductase 49…	0	0	0	0	0	0	0	0	0	0
GRMZM5G866223	'1.1.40'	'PS.lightreaction.cyclic electron flow-chlororespiration'	'moderately similar to ( 305) ATCG01090 | Symbols: NDHI | Encodes subunit of the chloroplast NAD(P)H dehydrogenase complex | chrC:119244-119762 REVERSEmoderately similar to ( 379) NDHI_MAIZE NAD(P)H-quinone oxidoreductase subunit I, chloroplast (EC 1.6.5.-) (NAD(P)H dehydrogenase subunit I) (NDH subunit I) (NADH-plastoquinone oxidoreductase subunit I) - Zea mays (Maize)moderately similar to ( 365…	0	0	0	0	0	0	0	0	0	0
GRMZM5G874448	'1.1.40'	'PS.lightreaction.cyclic electron flow-chlororespiration'	'highly similar to ( 521) ATCG01100 | Symbols: NDHA | NADH dehydrogenase ND1 | chrC:119847-122009 REVERSEhighly similar to ( 639) NU1C_MAIZE NAD(P)H-quinone oxidoreductase subunit 1, chloroplast (EC 1.6.5.-) (NAD(P)H dehydrogenase subunit 1) (NDH subunit 1) (NADH-plastoquinone oxidoreductase subunit 1) - Zea mays (Maize)highly similar to ( 621) loc_osp1g00960 11562.m00087 protein NADH dehydrogena…	0	0	0	0	0	0	0	0	0	0
GRMZM5G876106	'1.1.40'	'PS.lightreaction.cyclic electron flow-chlororespiration'	'highly similar to ( 639) ATCG01250 | Symbols: NDHB.2 | NADH dehydrogenase ND2 | chrC:141854-143708 FORWARDhighly similar to ( 887) NU2C_SACOF NAD(P)H-quinone oxidoreductase chain 2, chloroplast (EC 1.6.5.-) (NAD(P)H dehydrogenase, chain 2) (NADH-plastoquinone oxidoreductase chain 2) - Saccharum officinarum (Sugarcane)highly similar to ( 881) loc_osp1g01060 11562.m00096 protein NADH dehydrogenase…	0	0	0	0	0	0	0	0	0	0
GRMZM5G885392	'1.1.40'	'PS.lightreaction.cyclic electron flow-chlororespiration'	'moderately similar to ( 372) AT4G22890 | Symbols: PGR5-LIKE A | PGR5-LIKE A | chr4:12007157-12009175 FORWARDmoderately similar to ( 417) loc_os08g41460 12008.m080214 protein expressed protein seq=cds; coord=7:33226816..33236726:-1; parent_gene=GRMZM5G885392'	0	0.1	0.1	0.05	0	0.05	0.1	0	0.05	0.05
GRMZM5G894515	'1.1.40'	'PS.lightreaction.cyclic electron flow-chlororespiration'	'highly similar to ( 914) ATCG01010 | Symbols: NDHF | Chloroplast encoded NADH dehydrogenase unit. | chrC:110398-112638 REVERSEnearly identical (1367) NU5C_MAIZE NAD(P)H-quinone oxidoreductase chain 5, chloroplast (EC 1.6.5.-) (NAD(P)H dehydrogenase, chain 5) (NADH-plastoquinone oxidoreductase chain 5) - Zea mays (Maize)nearly identical (1217) loc_osp1g00880 11562.m00079 protein NADH dehydrogenas…	0	0	0	0	0	0	0	0	0	0
GRMZM5G896082	'1.1.40'	'PS.lightreaction.cyclic electron flow-chlororespiration'	'moderately similar to ( 392) AT4G22890 | Symbols: PGR5-LIKE A | PGR5-LIKE A | chr4:12007157-12009175 FORWARDmoderately similar to ( 434) loc_os03g64020 12003.m11268 protein expressed protein seq=cds; coord=1:299559538..299566152:-1; parent_gene=GRMZM5G896082'	4.1	6.05	4.7	4.45	2.5	3.05	3.15	3.15	4	4.3
GRMZM5G896790	'1.1.40'	'PS.lightreaction.cyclic electron flow-chlororespiration'	'moderately similar to ( 270) ATCG01090 | Symbols: NDHI | Encodes subunit of the chloroplast NAD(P)H dehydrogenase complex | chrC:119244-119762 REVERSEmoderately similar to ( 299) NDHI_MAIZE NAD(P)H-quinone oxidoreductase subunit I, chloroplast (EC 1.6.5.-) (NAD(P)H dehydrogenase subunit I) (NDH subunit I) (NADH-plastoquinone oxidoreductase subunit I) - Zea mays (Maize)moderately similar to ( 289…	0	0	0	0	0	0	0	0	0	0
GRMZM5G897592	'1.1.5'	'PS.lightreaction.other electron carrier (ox/red)'	'weakly similar to ( 171) AT5G45040 | Symbols: | cytochrome c6 (ATC6) | chr5:18175566-18176851 REVERSEmoderately similar to ( 210) loc_os07g38000 12007.m08049 protein cytochrome c6, putative, expressed seq=cds; coord=7:158366161..158367863:-1; parent_gene=GRMZM5G897592'	4	0.9	4.05	4.4	1.55	0.85	1.8	2.45	1.85	1.55
GRMZM2G071450	'1.1.5.1'	'PS.lightreaction.other electron carrier (ox/red).plastocyanin'	'weakly similar to ( 150) AT1G76100 | Symbols: PETE1 | PETE1 (PLASTOCYANIN 1); copper ion binding / electron carrier | chr1:28554217-28554732 REVERSEweakly similar to ( 180) PLAS_ORYSA Plastocyanin, chloroplast precursor - Oryza sativa (Rice)weakly similar to ( 180) loc_os06g01210 12006.m04861 protein plastocyanin, chloroplast precursor, putative, expressed seq=cds; coord=6:54213230..54215038:1; …	0.25	5.2	21.45	4.05	2.35	1.4	3.4	16.8	2.45	13
AC232238.2_FG005	'1.1.5.2'	'PS.lightreaction.other electron carrier (ox/red).ferredoxin'	'weakly similar to ( 144) AT2G27510 | Symbols: ATFD3 | ATFD3 (ferredoxin 3); 2 iron, 2 sulfur cluster binding / electron carrier/ iron-sulfur cluster binding | chr2:11758281-11758748 REVERSEweakly similar to ( 155) FER6_MAIZE Ferredoxin-6, chloroplast precursor (Ferredoxin VI) (Fd VI) - Zea mays (Maize)weakly similar to ( 170) loc_os01g64120 12001.m12527 protein ferredoxin-6, chloroplast precurso…	0	0	0	0	0	0	0	0	0	0
GRMZM2G032253	'1.1.5.2'	'PS.lightreaction.other electron carrier (ox/red).ferredoxin'	'weakly similar to ( 192) AT3G16250 | Symbols: NDF4 | NDF4 (NDH-DEPENDENT CYCLIC ELECTRON FLOW 1); electron carrier/ iron-sulfur cluster binding | chr3:5507091-5508320 REVERSEmoderately similar to ( 244) loc_os07g30670 12007.m079681 protein electron carrier/ electron transporter/ iron ion binding protein, putative, expressed seq=cds; coord=7:149563885..149565706:1; parent_gene=GRMZM2G032253'	4.3	3.6	3.4	4.6	1.05	1.65	4	12.25	1	3.05
GRMZM2G043162	'1.1.5.2'	'PS.lightreaction.other electron carrier (ox/red).ferredoxin'	'weakly similar to ( 148) AT1G10960 | Symbols: ATFD1 | ATFD1 (FERREDOXIN 1); 2 iron, 2 sulfur cluster binding / electron carrier/ iron-sulfur cluster binding | chr1:3664445-3664891 FORWARDweakly similar to ( 160) FER5_MAIZE Ferredoxin-5, chloroplast precursor (Ferredoxin V) (Fd V) - Zea mays (Maize)weakly similar to ( 157) loc_os08g01380 12008.m080056 protein ferredoxin-1, chloroplast precursor, …	0	0.1	0.3	0.1	0.1	0	0.3	0.15	0.1	0.15
GRMZM2G048313	'1.1.5.2'	'PS.lightreaction.other electron carrier (ox/red).ferredoxin'	'weakly similar to ( 110) AT1G60950 | Symbols: FED A, ATFD2 | FED A; 2 iron, 2 sulfur cluster binding / electron carrier/ iron-sulfur cluster binding | chr1:22444565-22445011 FORWARDweakly similar to ( 143) FER5_MAIZE Ferredoxin-5, chloroplast precursor (Ferredoxin V) (Fd V) - Zea mays (Maize)weakly similar to ( 135) loc_os08g01380 12008.m080056 protein ferredoxin-1, chloroplast precursor, putati…	0	0	0	0	0	0	0	0.1	0	0
GRMZM2G053458	'1.1.5.2'	'PS.lightreaction.other electron carrier (ox/red).ferredoxin'	'weakly similar to ( 164) AT2G27510 | Symbols: ATFD3 | ATFD3 (ferredoxin 3); 2 iron, 2 sulfur cluster binding / electron carrier/ iron-sulfur cluster binding | chr2:11758281-11758748 REVERSEmoderately similar to ( 306) FER3_MAIZE Ferredoxin-3, chloroplast precursor (Ferredoxin III) (Fd III) - Zea mays (Maize)moderately similar to ( 253) loc_os03g61960 12003.m11075 protein ferredoxin-3, chloroplas…	146	202.7	187.25	164.9	144.95	126.7	128.45	121.1	114.95	128.1	ferredoxin3
GRMZM2G063126	'1.1.5.2'	'PS.lightreaction.other electron carrier (ox/red).ferredoxin'	'weakly similar to ( 144) AT2G27510 | Symbols: ATFD3 | ATFD3 (ferredoxin 3); 2 iron, 2 sulfur cluster binding / electron carrier/ iron-sulfur cluster binding | chr2:11758281-11758748 REVERSEweakly similar to ( 155) FER6_MAIZE Ferredoxin-6, chloroplast precursor (Ferredoxin VI) (Fd VI) - Zea mays (Maize)weakly similar to ( 170) loc_os01g64120 12001.m12527 protein ferredoxin-6, chloroplast precurso…	0	0	0	0	0	0	0	0	0	0
GRMZM2G073609	'1.1.5.2'	'PS.lightreaction.other electron carrier (ox/red).ferredoxin'	'weakly similar to ( 160) AT1G02180 | Symbols: | ferredoxin-related | chr1:413619-414505 REVERSEmoderately similar to ( 256) loc_os02g58740 12002.m10894 protein expressed protein seq=cds; coord=5:217608466..217609483:-1; parent_gene=GRMZM2G073609'	25.9	14.95	17.35	28.65	17.55	4.6	15.5	17.5	16.7	2.3
GRMZM2G075775	'1.1.5.2'	'PS.lightreaction.other electron carrier (ox/red).ferredoxin'	'weakly similar to ( 135) AT1G02180 | Symbols: | ferredoxin-related | chr1:413619-414505 REVERSEmoderately similar to ( 276) loc_os08g35710 12008.m07560 protein expressed protein seq=cds; coord=4:63419630..63429299:-1; parent_gene=GRMZM2G075775'	32.45	15.35	48.2	41.75	56.8	54.7	69.85	64.5	52.15	78.75
GRMZM2G095826	'1.1.5.2'	'PS.lightreaction.other electron carrier (ox/red).ferredoxin'	'weakly similar to ( 150) AT2G27510 | Symbols: ATFD3 | ATFD3 (ferredoxin 3); 2 iron, 2 sulfur cluster binding / electron carrier/ iron-sulfur cluster binding | chr2:11758281-11758748 REVERSEweakly similar to ( 167) FER3_MAIZE Ferredoxin-3, chloroplast precursor (Ferredoxin III) (Fd III) - Zea mays (Maize)weakly similar to ( 183) loc_os04g33630 12004.m08458 protein ferredoxin-3, chloroplast precur…	11.15	10.05	11.55	10.55	8.95	6.75	8.1	14.55	12.4	8
GRMZM2G106190	'1.1.5.2'	'PS.lightreaction.other electron carrier (ox/red).ferredoxin'	'weakly similar to ( 142) AT2G27510 | Symbols: ATFD3 | ATFD3 (ferredoxin 3); 2 iron, 2 sulfur cluster binding / electron carrier/ iron-sulfur cluster binding | chr2:11758281-11758748 REVERSEmoderately similar to ( 276) FER6_MAIZE Ferredoxin-6, chloroplast precursor (Ferredoxin VI) (Fd VI) - Zea mays (Maize)moderately similar to ( 203) loc_os05g37140 12005.m28058 protein ferredoxin-6, chloroplast …	105.4	52.6	89.95	133.6	50.05	50.7	52.95	73.8	63.6	94.1
GRMZM2G122327	'1.1.5.2'	'PS.lightreaction.other electron carrier (ox/red).ferredoxin'	'weakly similar to ( 115) AT1G60950 | Symbols: FED A, ATFD2 | FED A; 2 iron, 2 sulfur cluster binding / electron carrier/ iron-sulfur cluster binding | chr1:22444565-22445011 FORWARDweakly similar to ( 196) FER5_MAIZE Ferredoxin-5, chloroplast precursor (Ferredoxin V) (Fd V) - Zea mays (Maize)weakly similar to ( 144) loc_os08g01380 12008.m080056 protein ferredoxin-1, chloroplast precursor, putati…	0.1	0.05	1.1	0	0	0.05	0.15	0.2	0	0.8
GRMZM2G122337	'1.1.5.2'	'PS.lightreaction.other electron carrier (ox/red).ferredoxin'	'weakly similar to ( 103) AT1G60950 | Symbols: FED A, ATFD2 | FED A; 2 iron, 2 sulfur cluster binding / electron carrier/ iron-sulfur cluster binding | chr1:22444565-22445011 FORWARDweakly similar to ( 182) FER1_MAIZE Ferredoxin-1, chloroplast precursor (Ferredoxin I) (Fd I) - Zea mays (Maize)weakly similar to ( 130) loc_os08g01380 12008.m080056 protein ferredoxin-1, chloroplast precursor, putati…	0	0.8	4.3	0.6	0.5	0.05	0.4	0.4	1.1	1.55
GRMZM2G146395	'1.1.5.2'	'PS.lightreaction.other electron carrier (ox/red).ferredoxin'	'weakly similar to ( 152) AT2G27510 | Symbols: ATFD3 | ATFD3 (ferredoxin 3); 2 iron, 2 sulfur cluster binding / electron carrier/ iron-sulfur cluster binding | chr2:11758281-11758748 REVERSEweakly similar to ( 158) FER3_MAIZE Ferredoxin-3, chloroplast precursor (Ferredoxin III) (Fd III) - Zea mays (Maize)weakly similar to ( 197) loc_os04g33630 12004.m08458 protein ferredoxin-3, chloroplast precur…	2.05	2.7	3.1	1.7	2.05	1.35	1.65	2.3	1.45	0.45
GRMZM2G359127	'1.1.5.2'	'PS.lightreaction.other electron carrier (ox/red).ferredoxin'	'weakly similar to ( 164) AT4G14890 | Symbols: | ferredoxin family protein | chr4:8520887-8521351 FORWARDvery weakly similar to (89.4) FER_CHLRE Ferredoxin, chloroplast precursor - Chlamydomonas reinhardtiimoderately similar to ( 207) loc_os03g45710 12003.m09594 protein ferredoxin, chloroplast precursor, putative, expressed seq=cds; coord=1:258882971..258883705:-1; parent_gene=GRMZM2G359127'	6.05	3.55	5.25	4.1	2.5	2.05	2.55	4.1	2.35	2.5
GRMZM2G470653	'1.1.5.2'	'PS.lightreaction.other electron carrier (ox/red).ferredoxin'	'moderately similar to ( 201) AT4G32590 | Symbols: | ferredoxin-related | chr4:15721417-15722781 FORWARDmoderately similar to ( 207) loc_os05g48160 12005.m27636 protein electron carrier/ electron transporter/ iron ion binding protein, putative, expressed seq=cds; coord=4:10541116..10542827:1; parent_gene=GRMZM2G470653'	0	0	0	0	0	0	0	0	0	0
GRMZM2G481261	'1.1.5.2'	'PS.lightreaction.other electron carrier (ox/red).ferredoxin'	'moderately similar to ( 223) AT4G32590 | Symbols: | ferredoxin-related | chr4:15721417-15722781 FORWARDmoderately similar to ( 235) loc_os05g48160 12005.m27636 protein electron carrier/ electron transporter/ iron ion binding protein, putative, expressed seq=cds; coord=6:163178134..163181036:-1; parent_gene=GRMZM2G481261'	8.65	3.2	6.45	7.9	5.75	4.2	6.7	10.95	7	5.1
GRMZM5G800925	'1.1.5.2'	'PS.lightreaction.other electron carrier (ox/red).ferredoxin'	'weakly similar to ( 146) AT5G07950 | Symbols: | unknown protein | chr5:2540530-2542047 REVERSEweakly similar to ( 192) loc_os03g11450 12003.m06596 protein expressed protein seq=cds; coord=9:147202569..147208034:-1; parent_gene=GRMZM5G800925'	41.8	32.55	45.5	40.8	36.1	29.9	40	46.1	37.85	31.8
GRMZM5G840703	'1.1.5.2'	'PS.lightreaction.other electron carrier (ox/red).ferredoxin'	'very weakly similar to (89.0) AT1G60950 | Symbols: FED A, ATFD2 | FED A; 2 iron, 2 sulfur cluster binding / electron carrier/ iron-sulfur cluster binding | chr1:22444565-22445011 FORWARDweakly similar to ( 158) FER5_MAIZE Ferredoxin-5, chloroplast precursor (Ferredoxin V) (Fd V) - Zea mays (Maize)weakly similar to ( 107) loc_os08g01380 12008.m080056 protein ferredoxin-1, chloroplast precursor, p…	0	0	0	0	0	0	0	0	0	0
GRMZM5G865543	'1.1.5.2'	'PS.lightreaction.other electron carrier (ox/red).ferredoxin'	'very weakly similar to (99.0) AT3G16250 | Symbols: NDF4 | NDF4 (NDH-DEPENDENT CYCLIC ELECTRON FLOW 1); electron carrier/ iron-sulfur cluster binding | chr3:5507091-5508320 REVERSEweakly similar to ( 116) loc_os07g30670 12007.m079681 protein electron carrier/ electron transporter/ iron ion binding protein, putative, expressed seq=cds; coord=2:200084313..200085934:1; parent_gene=GRMZM5G865543'	0	0	0	0	0	0	0	0	0	0
GRMZM5G896916	'1.1.5.2'	'PS.lightreaction.other electron carrier (ox/red).ferredoxin'	'weakly similar to ( 187) AT5G07950 | Symbols: | unknown protein | chr5:2540530-2542047 REVERSEmoderately similar to ( 288) loc_os03g11450 12003.m06596 protein expressed protein seq=cds; coord=9:147140989..147151193:-1; parent_gene=GRMZM5G896916'	22.65	14.85	25.35	23.15	25.95	21.2	23.45	30.05	23.8	19.95
GRMZM2G059083	'1.1.5.3'	'PS.lightreaction.other electron carrier (ox/red).ferredoxin reductase'	'highly similar to ( 517) AT5G66190 | Symbols: ATLFNR1 | FNR1 (FERREDOXIN-NADP(+)-OXIDOREDUCTASE 1); NADPH dehydrogenase/ electron transporter, transferring electrons within the cyclic electron transport pathway of photosynthesis/ electron transporter, transferring electrons within the noncyclic electron transp | chr5:26451203-26452616 REVERSEhighly similar to ( 525) FENR1_ORYSA Ferredoxin--NADP …	4.95	4.45	4.9	7.5	1.75	0.8	3.4	5.05	3.7	8.25
GRMZM2G059191	'1.1.5.3'	'PS.lightreaction.other electron carrier (ox/red).ferredoxin reductase'	'highly similar to ( 528) AT5G66190 | Symbols: ATLFNR1 | FNR1 (FERREDOXIN-NADP(+)-OXIDOREDUCTASE 1); NADPH dehydrogenase/ electron transporter, transferring electrons within the cyclic electron transport pathway of photosynthesis/ electron transporter, transferring electrons within the noncyclic electron transp | chr5:26451203-26452616 REVERSEhighly similar to ( 545) FENR1_ORYSA Ferredoxin--NADP …	0.05	0.05	1.2	0.1	0	0.05	0.1	0.1	0.15	0.35
GRMZM2G151993	'1.1.5.3'	'PS.lightreaction.other electron carrier (ox/red).ferredoxin reductase'	'very weakly similar to (80.1) AT5G66190 | Symbols: ATLFNR1 | FNR1 (FERREDOXIN-NADP(+)-OXIDOREDUCTASE 1); NADPH dehydrogenase/ electron transporter, transferring electrons within the cyclic electron transport pathway of photosynthesis/ electron transporter, transferring electrons within the noncyclic electron transp | chr5:26451203-26452616 REVERSEvery weakly similar to (85.5) FENR1_ORYSA Ferredo…	10.4	11.9	29.15	5.55	15	12.05	13.3	17.45	28.05	7.55
GRMZM2G168143	'1.1.5.3'	'PS.lightreaction.other electron carrier (ox/red).ferredoxin reductase'	'highly similar to ( 514) AT5G66190 | Symbols: ATLFNR1 | FNR1 (FERREDOXIN-NADP(+)-OXIDOREDUCTASE 1); NADPH dehydrogenase/ electron transporter, transferring electrons within the cyclic electron transport pathway of photosynthesis/ electron transporter, transferring electrons within the noncyclic electron transp | chr5:26451203-26452616 REVERSEhighly similar to ( 530) FENR1_ORYSA Ferredoxin--NADP …	3.1	5.1	5.4	4.55	1.65	1.45	3.9	1.85	4.05	7.95
GRMZM2G308956	'1.1.5.3'	'PS.lightreaction.other electron carrier (ox/red).ferredoxin reductase'	'weakly similar to ( 127) AT5G66190 | Symbols: ATLFNR1 | FNR1 (FERREDOXIN-NADP(+)-OXIDOREDUCTASE 1); NADPH dehydrogenase/ electron transporter, transferring electrons within the cyclic electron transport pathway of photosynthesis/ electron transporter, transferring electrons within the noncyclic electron transp | chr5:26451203-26452616 REVERSEweakly similar to ( 132) FENR1_ORYSA Ferredoxin--NADP …	0	0	0	0	0	0	0	0	0.05	0
GRMZM2G319150	'1.1.5.3'	'PS.lightreaction.other electron carrier (ox/red).ferredoxin reductase'	'weakly similar to ( 123) AT5G66190 | Symbols: ATLFNR1 | FNR1 (FERREDOXIN-NADP(+)-OXIDOREDUCTASE 1); NADPH dehydrogenase/ electron transporter, transferring electrons within the cyclic electron transport pathway of photosynthesis/ electron transporter, transferring electrons within the noncyclic electron transp | chr5:26451203-26452616 REVERSEweakly similar to ( 125) FENR_VICFA Ferredoxin--NADP r…	0	0	0	0	0	0	0	0	0	0
GRMZM2G320305	'1.1.5.3'	'PS.lightreaction.other electron carrier (ox/red).ferredoxin reductase'	'weakly similar to ( 157) AT5G66190 | Symbols: ATLFNR1 | FNR1 (FERREDOXIN-NADP(+)-OXIDOREDUCTASE 1); NADPH dehydrogenase/ electron transporter, transferring electrons within the cyclic electron transport pathway of photosynthesis/ electron transporter, transferring electrons within the noncyclic electron transp | chr5:26451203-26452616 REVERSEweakly similar to ( 156) FENR1_ORYSA Ferredoxin--NADP …	9.65	7.6	9.2	9.15	7.2	7.25	8	4.8	8.6	6.9
GRMZM2G395728	'1.1.5.3'	'PS.lightreaction.other electron carrier (ox/red).ferredoxin reductase'	'moderately similar to ( 260) AT5G66190 | Symbols: ATLFNR1 | FNR1 (FERREDOXIN-NADP(+)-OXIDOREDUCTASE 1); NADPH dehydrogenase/ electron transporter, transferring electrons within the cyclic electron transport pathway of photosynthesis/ electron transporter, transferring electrons within the noncyclic electron transp | chr5:26451203-26452616 REVERSEmoderately similar to ( 266) FENR_MESCR Ferredoxin…	0	0	0	0.05	0.1	0	0	0.05	0.05	0
GRMZM2G015267	'1.1.5.4'	'PS.lightreaction.other electron carrier (ox/red).ferredoxin oxireductase'	'weakly similar to ( 200) AT1G15140 | Symbols: | oxidoreductase NAD-binding domain-containing protein | chr1:5210642-5212137 REVERSEweakly similar to ( 171) K502_ACTCH Fruit protein PKIWI502 - Actinidia chinensis (Kiwi) (Yangtao)moderately similar to ( 330) loc_os01g03050 12001.m06944 protein fruit protein PKIWI502, putative, expressed seq=cds; coord=3:7415412..7418296:-1; parent_gene=GRMZM2G0152…	23.4	31.35	20.7	26.05	26.45	21.3	25.3	16.6	26.35	26.9
GRMZM2G084279	'1.1.5.4'	'PS.lightreaction.other electron carrier (ox/red).ferredoxin oxireductase'	'moderately similar to ( 295) AT1G15140 | Symbols: | oxidoreductase NAD-binding domain-containing protein | chr1:5210642-5212137 REVERSEmoderately similar to ( 242) K502_ACTCH Fruit protein PKIWI502 - Actinidia chinensis (Kiwi) (Yangtao)moderately similar to ( 366) loc_os02g22260 12002.m33669 protein fruit protein PKIWI502, putative, expressed seq=cds; coord=5:162834761..162837541:1; parent_gene=…	12.75	19.5	33.05	15.7	8.75	9.4	19.35	19.1	11.65	13.95
GRMZM5G861678	'1.1.5.4'	'PS.lightreaction.other electron carrier (ox/red).ferredoxin oxireductase'	'weakly similar to ( 139) AT3G09150 | Symbols: HY2, GUN3 | HY2 (ELONGATED HYPOCOTYL 2); phytochromobilin:ferredoxin oxidoreductase | chr3:2803665-2805333 FORWARDweakly similar to ( 182) loc_os01g72090 12001.m42525 protein phycoerythrobilin ferredoxin oxidoreductase, putative, expressed seq=cds; coord=8:158762141..158763168:1; parent_gene=GRMZM5G861678'	25.25	16.35	19.25	23.1	22.35	22.65	23.2	22.55	27.75	15.8	elongated mesocotyl1
GRMZM2G003230	'1.1.6'	'PS.lightreaction.NADH DH'	'weakly similar to ( 142) ATCG00420 | Symbols: NDHJ | Encodes NADH dehydrogenase subunit J. Its transcription is increased upon sulfur depletion. | chrC:48677-49153 REVERSEweakly similar to ( 164) NDHJ_SACOF NAD(P)H-quinone oxidoreductase chain J, chloroplast (EC 1.6.5.-) (NAD(P)H dehydrogenase, chain J) (NADH-plastoquinone oxidoreductase subunit J) - Saccharum officinarum (Sugarcane)weakly simil…	0	0	0	0	0	0	0	0	0	0
GRMZM2G070573	'1.1.6'	'PS.lightreaction.NADH DH'	'very weakly similar to (97.1) ATCG01080 | Symbols: NDHG | NADH dehydrogenase ND6 | chrC:118377-118907 REVERSEweakly similar to ( 116) NU6C_WHEAT NAD(P)H-quinone oxidoreductase chain 6, chloroplast (EC 1.6.5.-) (NAD(P)H dehydrogenase, chain 6) (NADH-plastoquinone oxidoreductase chain 6) - Triticum aestivum (Wheat)weakly similar to ( 110) loc_os02g24574 12002.m100730 protein NAD(P)H-dependent oxid…	0	0	0	0	0	0	0	0	0	0
GRMZM2G070685	'1.1.6'	'PS.lightreaction.NADH DH'	'weakly similar to ( 157) ATCG00420 | Symbols: NDHJ | Encodes NADH dehydrogenase subunit J. Its transcription is increased upon sulfur depletion. | chrC:48677-49153 REVERSEmoderately similar to ( 203) NDHJ_SACOF NAD(P)H-quinone oxidoreductase chain J, chloroplast (EC 1.6.5.-) (NAD(P)H dehydrogenase, chain J) (NADH-plastoquinone oxidoreductase subunit J) - Saccharum officinarum (Sugarcane)weakly s…	0	0	0.05	0	0	0	0	0	0	0
GRMZM2G109244	'1.1.6'	'PS.lightreaction.NADH DH'	'moderately similar to ( 201) AT4G37925 | Symbols: NDH-M | NDH-M (subunit NDH-M of NAD(P)H:plastoquinone dehydrogenase complex) | chr4:17830748-17831485 REVERSEmoderately similar to ( 273) loc_os04g45600 12004.m09513 protein expressed protein seq=cds; coord=2:22192252..22193718:-1; parent_gene=GRMZM2G109244'	63.35	87.5	48.35	55.55	19.6	16.6	16.6	25.55	23.7	21.9
GRMZM2G110277	'1.1.6'	'PS.lightreaction.NADH DH'	'moderately similar to ( 272) AT5G58260 | Symbols: | Encodes subunit NDH-N of NAD(P)H:plastoquinone dehydrogenase complex (Ndh complex) present in the thylakoid membrane of chloroplasts. This subunit is thought to be required for Ndh complex assembly. | chr5:23561356-23561929 REVERSEmoderately similar to ( 338) loc_os01g66000 12001.m12708 protein NADH dehydrogenase I subunit N, putative, expresse…	5.4	4.75	4.7	4.95	4	3.2	2.4	4.55	3.05	3.8
GRMZM2G133844	'1.1.6'	'PS.lightreaction.NADH DH'	'weakly similar to ( 160) AT1G74880 | Symbols: NDH-O | NDH-O (NAD(P)H:plastoquinone dehydrogenase complex subunit O) | chr1:28130112-28131020 REVERSEweakly similar to ( 178) loc_os01g72950 12001.m13327 protein expressed protein seq=cds; coord=8:157375135..157376422:-1; parent_gene=GRMZM2G133844'	2.15	2.8	6.3	4.15	2.75	2.3	3.75	5.5	1.3	18.55
GRMZM2G136680	'1.1.6'	'PS.lightreaction.NADH DH'	'moderately similar to ( 435) AT4G37920 | Symbols: | unknown protein | chr4:17828538-17830317 REVERSEhighly similar to ( 607) loc_os01g20110 12001.m42980 protein expressed protein seq=cds; coord=6:8135664..8141190:-1; parent_gene=GRMZM2G136680'	26.75	19.45	25.4	21.45	17.65	19.1	16.55	25.7	18.1	15.3
GRMZM2G154667	'1.1.6'	'PS.lightreaction.NADH DH'	'weakly similar to ( 104) IF1C_MAIZE Translation initiation factor IF-1, chloroplast - Zea mays (Maize)weakly similar to ( 104) loc_osp1g00690 11562.m00060 protein translation initiation factor 1 seq=cds; coord=10:100011659..100013586:1; parent_gene=GRMZM2G154667'	0.35	0.35	0.55	0.95	0.3	0.55	0.2	0.15	0.35	0.1
GRMZM2G175383	'1.1.6'	'PS.lightreaction.NADH DH'	'weakly similar to ( 145) ATCG00420 | Symbols: NDHJ | Encodes NADH dehydrogenase subunit J. Its transcription is increased upon sulfur depletion. | chrC:48677-49153 REVERSEweakly similar to ( 169) NDHJ_SACOF NAD(P)H-quinone oxidoreductase chain J, chloroplast (EC 1.6.5.-) (NAD(P)H dehydrogenase, chain J) (NADH-plastoquinone oxidoreductase subunit J) - Saccharum officinarum (Sugarcane)weakly simil…	0	0	0	0	0	0	0	0	0	0
GRMZM2G176129	'1.1.6'	'PS.lightreaction.NADH DH'	'weakly similar to ( 119) AT1G70760 | Symbols: CRR23 | CRR23 ((chlororespiratory reduction 23) | chr1:26687267-26688201 FORWARDweakly similar to ( 198) loc_os05g28090 12005.m07096 protein expressed protein seq=cds; coord=2:180163167..180166298:-1; parent_gene=GRMZM2G176129'	0.05	0	0	0.05	0.35	0.1	0.25	0.05	0.05	0.55
GRMZM2G304947	'1.1.6'	'PS.lightreaction.NADH DH'	'moderately similar to ( 300) ATCG00430 | Symbols: PSBG | Encodes a protein which was originally thought to be part of photosystem II but its wheat homolog was later shown to encode for subunit K of NADH dehydrogenase. | chrC:49257-49934 REVERSEmoderately similar to ( 355) NDHK_SACOF NAD(P)H-quinone oxidoreductase chain K, chloroplast (EC 1.6.5.-) (NAD(P)H dehydrogenase, chain K) (NADH-plastoquin…	0	0	0	0	0	0	0	0	0	0
GRMZM2G394607	'1.1.6'	'PS.lightreaction.NADH DH'	'moderately similar to ( 253) ATCG00420 | Symbols: NDHJ | Encodes NADH dehydrogenase subunit J. Its transcription is increased upon sulfur depletion. | chrC:48677-49153 REVERSEmoderately similar to ( 314) NDHJ_SACOF NAD(P)H-quinone oxidoreductase chain J, chloroplast (EC 1.6.5.-) (NAD(P)H dehydrogenase, chain J) (NADH-plastoquinone oxidoreductase subunit J) - Saccharum officinarum (Sugarcane)mode…	0	0	0	0	0	0	0	0	0	0
GRMZM2G404025	'1.1.6'	'PS.lightreaction.NADH DH'	'moderately similar to ( 281) ATCG00420 | Symbols: NDHJ | Encodes NADH dehydrogenase subunit J. Its transcription is increased upon sulfur depletion. | chrC:48677-49153 REVERSEmoderately similar to ( 343) NDHJ_SACOF NAD(P)H-quinone oxidoreductase chain J, chloroplast (EC 1.6.5.-) (NAD(P)H dehydrogenase, chain J) (NADH-plastoquinone oxidoreductase subunit J) - Saccharum officinarum (Sugarcane)mode…	0	0	0	0	0	0	0	0	0	0
GRMZM2G475437	'1.1.6'	'PS.lightreaction.NADH DH'	'weakly similar to ( 144) ATCG00430 | Symbols: PSBG | Encodes a protein which was originally thought to be part of photosystem II but its wheat homolog was later shown to encode for subunit K of NADH dehydrogenase. | chrC:49257-49934 REVERSEweakly similar to ( 162) NDHK_SACOF NAD(P)H-quinone oxidoreductase chain K, chloroplast (EC 1.6.5.-) (NAD(P)H dehydrogenase, chain K) (NADH-plastoquinone oxid…	0	0	0	0	0	0	0	0	0	0
GRMZM5G800096	'1.1.6'	'PS.lightreaction.NADH DH'	'highly similar to ( 768) ATCG01050 | Symbols: NDHD | Represents a plastid-encoded subunit of a NAD(P)H dehydrogenase complex. Its mRNA is edited at four positions. Translation data is not available for this gene. | chrC:115665-117185 REVERSEhighly similar to ( 964) NU4C_MAIZE NAD(P)H-quinone oxidoreductase chain 4, chloroplast (EC 1.6.5.-) (NAD(P)H dehydrogenase, chain 4) (NADH-plastoquinone oxi…	0.25	0.05	0.05	0.4	0.05	0.1	0.05	0	0.05	0
GRMZM5G800980	'1.1.6'	'PS.lightreaction.NADH DH'	'moderately similar to ( 353) ATCG00430 | Symbols: PSBG | Encodes a protein which was originally thought to be part of photosystem II but its wheat homolog was later shown to encode for subunit K of NADH dehydrogenase. | chrC:49257-49934 REVERSEmoderately similar to ( 464) NDHK_MAIZE NAD(P)H-quinone oxidoreductase chain K, chloroplast (EC 1.6.5.-) (NAD(P)H dehydrogenase, chain K) (NADH-plastoquin…	0	0	0	0	0	0	0	0	0	0
GRMZM5G824336	'1.1.6'	'PS.lightreaction.NADH DH'	'weakly similar to ( 145) AT1G36320 | Symbols: | unknown protein | chr1:13671876-13673939 FORWARDmoderately similar to ( 223) loc_os02g18940 12002.m07137 protein expressed protein seq=cds; coord=4:220086444..220093328:1; parent_gene=GRMZM5G824336'	38.45	32.45	37.2	40.5	43.4	40.45	42.15	52.45	39.1	37
GRMZM5G851051	'1.1.6'	'PS.lightreaction.NADH DH'	'weakly similar to ( 102) AT1G70760 | Symbols: CRR23 | CRR23 ((chlororespiratory reduction 23) | chr1:26687267-26688201 FORWARDweakly similar to ( 184) loc_os05g28090 12005.m07096 protein expressed protein seq=cds; coord=7:110906646..110908277:-1; parent_gene=GRMZM5G851051'	0.05	0.3	0.45	0.05	0	0	0	0	0.05	0.1
GRMZM5G864407	'1.1.6'	'PS.lightreaction.NADH DH'	'moderately similar to ( 213) ATCG01080 | Symbols: NDHG | NADH dehydrogenase ND6 | chrC:118377-118907 REVERSEmoderately similar to ( 287) NU6C_SACOF NAD(P)H-quinone oxidoreductase chain 6, chloroplast (EC 1.6.5.-) (NAD(P)H dehydrogenase, chain 6) (NADH-plastoquinone oxidoreductase chain 6) - Saccharum officinarum (Sugarcane)moderately similar to ( 276) loc_os02g24574 12002.m100730 protein NAD(P)H…	0	0	0	0	0	0	0	0	0	0
GRMZM2G436710	'1.1.99'	'PS.lightreaction.unspecified'	'moderately similar to ( 280) AT5G53490 | Symbols: | thylakoid lumenal 17.4 kDa protein, chloroplast | chr5:21723488-21724621 REVERSEmoderately similar to ( 356) loc_os10g35810 12010.m06399 protein uncharacterized low-complexity proteins, putative, expressed seq=cds; coord=5:24215306..24218389:1; parent_gene=GRMZM2G436710'	14.65	13.1	9	11.15	10.25	5.4	4.45	8.8	7.15	3.35
GRMZM2G025882	'1.1.99.1'	'PS.lightreaction.unspecified.TEF'	'moderately similar to ( 317) AT1G54780 | Symbols: | thylakoid lumen 18.3 kDa protein | chr1:20439533-20440953 FORWARDmoderately similar to ( 364) loc_os05g33280 12005.m07560 protein beta-propeller domains of methanol dehydrogenase type, putative, expressed seq=cds; coord=8:88438772..88440193:1; parent_gene=GRMZM2G025882'	0	0.1	0.2	0.05	0	0	0	0.1	0.05	0.2
GRMZM2G122715	'1.1.99.1'	'PS.lightreaction.unspecified.TEF'	'moderately similar to ( 313) AT5G23060 | Symbols: CaS | CaS (Calcium sensing receptor) | chr5:7736760-7738412 REVERSEmoderately similar to ( 433) loc_os02g49680 12002.m10002 protein calcium sensing receptor, putative, expressed seq=cds; coord=4:165697039..165699055:-1; parent_gene=GRMZM2G122715'	6.1	4.3	8.25	9	3.9	4.85	11.95	14.45	4.4	24.95
GRMZM2G423137	'1.1.99.1'	'PS.lightreaction.unspecified.TEF'	'moderately similar to ( 214) AT3G61870 | Symbols: | unknown protein | chr3:22902702-22903895 FORWARDmoderately similar to ( 241) loc_os02g03010 12002.m05651 protein expressed protein seq=cds; coord=4:238355940..238357484:-1; parent_gene=GRMZM2G423137'	0.9	2.65	5.25	1.95	1.2	1	8.8	15.05	1.1	3.85
GRMZM5G873519	'1.1.99.1'	'PS.lightreaction.unspecified.TEF'	'moderately similar to ( 268) AT1G32080 | Symbols: | membrane protein, putative | chr1:11537572-11539756 REVERSEmoderately similar to ( 251) loc_os10g42780 12010.m22039 protein lrgB-like family protein, expressed seq=cds; coord=1:105228789..105231470:-1; parent_gene=GRMZM5G873519'	0.1	0.1	0.2	0.45	0.15	0	0.25	0.3	0.05	0
GRMZM2G168281	'1.2'	'PS.photorespiration'	'moderately similar to ( 402) AT4G17360 | Symbols: | formyltetrahydrofolate deformylase/ hydroxymethyl-, formyl- and related transferase/ methyltransferase | chr4:9703698-9705468 REVERSEhighly similar to ( 533) loc_os03g01222 12003.m35587 protein formyltetrahydrofolate deformylase, putative, expressed seq=cds; coord=9:155451718..155453474:-1; parent_gene=GRMZM2G168281'	4.15	2.5	5.6	4.9	2.8	3.3	2.95	4.85	3.6	6.65
GRMZM2G417843	'1.2.1'	'PS.photorespiration.phosphoglycolate phosphatase'	'moderately similar to ( 401) AT5G47760 | Symbols: PGLP2, ATPGLP2, ATPK5 | ATPGLP2 (ARABIDOPSIS THALIANA 2-PHOSPHOGLYCOLATE PHOSPHATASE 2); phosphoglycolate phosphatase/ protein serine/threonine kinase | chr5:19343121-19344979 REVERSEhighly similar to ( 556) loc_os09g08660 12009.m04133 protein 4-nitrophenylphosphatase, putative, expressed seq=cds; coord=1:299197998..299202494:-1; parent_gene=GRMZ…	33.3	49.9	36.3	32.65	17.7	13.9	15.65	25.3	30.7	23.5
GRMZM2G076239	'1.2.2'	'PS.photorespiration.glycolate oxydase'	'weakly similar to ( 147) AT3G14420 | Symbols: | (S)-2-hydroxy-acid oxidase, peroxisomal, putative / glycolate oxidase, putative / short chain alpha-hydroxy acid oxidase, putative | chr3:4821899-4823899 FORWARDweakly similar to ( 149) GOX_SPIOL Peroxisomal (S)-2-hydroxy-acid oxidase (EC 1.1.3.15) (Glycolate oxidase) (GOX) (Short chain alpha-hydroxy acid oxidase) - Spinacia oleracea (Spinach)weakl…	0.2	0.15	0.05	0.05	0.05	0.1	0	0	0.05	0
GRMZM2G129246	'1.2.2'	'PS.photorespiration.glycolate oxydase'	'highly similar to ( 528) AT3G14420 | Symbols: | (S)-2-hydroxy-acid oxidase, peroxisomal, putative / glycolate oxidase, putative / short chain alpha-hydroxy acid oxidase, putative | chr3:4821899-4823899 FORWARDhighly similar to ( 524) GOX_SPIOL Peroxisomal (S)-2-hydroxy-acid oxidase (EC 1.1.3.15) (Glycolate oxidase) (GOX) (Short chain alpha-hydroxy acid oxidase) - Spinacia oleracea (Spinach)highl…	0	0.05	0	0	0	0	0	0	0	0
GRMZM2G148194	'1.2.2'	'PS.photorespiration.glycolate oxydase'	'weakly similar to ( 107) AT3G14130 | Symbols: | (S)-2-hydroxy-acid oxidase, peroxisomal, putative / glycolate oxidase, putative / short chain alpha-hydroxy acid oxidase, putative | chr3:4685844-4687852 REVERSEweakly similar to ( 121) loc_os07g42440 12007.m079750 protein hydroxyacid oxidase 1, putative, expressed seq=cds; coord=2:211479287..211485001:1; parent_gene=GRMZM2G148194'	12.55	12	12.65	13.7	4.55	4.1	6.25	7.45	6.55	6.5
GRMZM5G853854	'1.2.2'	'PS.photorespiration.glycolate oxydase'	'highly similar to ( 504) AT4G18360 | Symbols: | (S)-2-hydroxy-acid oxidase, peroxisomal, putative / glycolate oxidase, putative / short chain alpha-hydroxy acid oxidase, putative | chr4:10146627-10148386 REVERSEmoderately similar to ( 498) GOX_SPIOL Peroxisomal (S)-2-hydroxy-acid oxidase (EC 1.1.3.15) (Glycolate oxidase) (GOX) (Short chain alpha-hydroxy acid oxidase) - Spinacia oleracea (Spinach…	56.95	64.5	33	76.65	7.95	3.5	3	3.95	14.05	15.35
GRMZM2G010321	'1.2.4'	'PS.photorespiration.glycine cleavage'	'weakly similar to ( 105) loc_os02g07410 12002.m33576 protein glycine cleavage system H protein, mitochondrial precursor, putative, expressed seq=cds; coord=5:84934242..84936441:1; parent_gene=GRMZM2G010321'	58.75	66.1	69.2	68	70.05	75.25	83.75	68.4	60.8	101
GRMZM2G051208	'1.2.4.4'	'PS.photorespiration.glycine cleavage.H protein'	'moderately similar to ( 226) AT2G35120 | Symbols: | glycine cleavage system H protein, mitochondrial, putative | chr2:14805913-14807274 REVERSEweakly similar to ( 195) GCSH_FLAPR Glycine cleavage system H protein, mitochondrial precursor - Flaveria pringleimoderately similar to ( 249) loc_os06g45670 12006.m09095 protein glycine cleavage system H protein 1, mitochondrial precursor, putative, expr…	56.35	69.7	58.9	64.85	55.3	62.85	63.8	64.4	58.55	75.2
GRMZM2G399183	'1.2.4.4'	'PS.photorespiration.glycine cleavage.H protein'	'weakly similar to ( 188) AT2G35370 | Symbols: GDCH | GDCH; glycine dehydrogenase (decarboxylating) | chr2:14891239-14892050 FORWARDmoderately similar to ( 231) GCSH_ORYSA Glycine cleavage system H protein, mitochondrial precursor - Oryza sativa (Rice)moderately similar to ( 231) loc_os10g37180 12010.m06515 protein glycine cleavage system H protein, mitochondrial precursor, putative, expressed se…	0.8	0.45	4.05	1.8	0.8	1	1.1	2.95	1.2	1.7
GRMZM2G039238	'1.2.5'	'PS.photorespiration.serine hydroxymethyltransferase'	'highly similar to ( 765) AT4G13930 | Symbols: SHM4 | SHM4 (serine hydroxymethyltransferase 4); catalytic/ glycine hydroxymethyltransferase/ pyridoxal phosphate binding | chr4:8048013-8050021 REVERSEhighly similar to ( 528) GLYM_PEA Serine hydroxymethyltransferase, mitochondrial precursor (EC 2.1.2.1) (Serine methylase) (Glycine hydroxymethyltransferase) (SHMT) - Pisum sativum (Garden pea)highly …	147.8	232.1	114.95	117.55	88.8	87.2	71.9	76.05	83.25	57.7
GRMZM2G078143	'1.2.5'	'PS.photorespiration.serine hydroxymethyltransferase'	'highly similar to ( 815) AT4G13930 | Symbols: SHM4 | SHM4 (serine hydroxymethyltransferase 4); catalytic/ glycine hydroxymethyltransferase/ pyridoxal phosphate binding | chr4:8048013-8050021 REVERSEhighly similar to ( 524) GLYM_PEA Serine hydroxymethyltransferase, mitochondrial precursor (EC 2.1.2.1) (Serine methylase) (Glycine hydroxymethyltransferase) (SHMT) - Pisum sativum (Garden pea)highly …	197.3	240.1	202.9	208.6	188.25	222.05	204.25	156.55	174.05	218.15
GRMZM2G113959	'1.2.5'	'PS.photorespiration.serine hydroxymethyltransferase'	'moderately similar to ( 286) AT1G36370 | Symbols: SHM7 | SHM7 (serine hydroxymethyltransferase 7); catalytic/ glycine hydroxymethyltransferase/ pyridoxal phosphate binding | chr1:13696240-13698576 REVERSEweakly similar to ( 158) GLYM_SOLTU Serine hydroxymethyltransferase, mitochondrial precursor (EC 2.1.2.1) (Serine methylase) (Glycine hydroxymethyltransferase) (SHMT) - Solanum tuberosum (Potato…	39.1	47.65	43	39.85	50.35	40.55	48.05	43.25	50.2	50.65
GRMZM2G135283	'1.2.5'	'PS.photorespiration.serine hydroxymethyltransferase'	'moderately similar to ( 363) AT4G37930 | Symbols: SHM1, STM, SHMT1 | SHM1 (SERINE TRANSHYDROXYMETHYLTRANSFERASE 1); glycine hydroxymethyltransferase/ poly(U) binding | chr4:17831891-17834742 REVERSEmoderately similar to ( 360) GLYM_SOLTU Serine hydroxymethyltransferase, mitochondrial precursor (EC 2.1.2.1) (Serine methylase) (Glycine hydroxymethyltransferase) (SHMT) - Solanum tuberosum (Potato)m…	69	67.3	90.45	80	75.3	88.55	96.65	134.15	72.25	128.15
GRMZM2G171116	'1.2.5'	'PS.photorespiration.serine hydroxymethyltransferase'	'moderately similar to ( 403) AT1G36370 | Symbols: SHM7 | SHM7 (serine hydroxymethyltransferase 7); catalytic/ glycine hydroxymethyltransferase/ pyridoxal phosphate binding | chr1:13696240-13698576 REVERSEmoderately similar to ( 260) GLYM_PEA Serine hydroxymethyltransferase, mitochondrial precursor (EC 2.1.2.1) (Serine methylase) (Glycine hydroxymethyltransferase) (SHMT) - Pisum sativum (Garden p…	0.05	0.2	0.15	0.15	0.2	0.2	0.1	0	0.3	0.2
GRMZM2G437487	'1.2.5'	'PS.photorespiration.serine hydroxymethyltransferase'	'moderately similar to ( 249) AT4G13930 | Symbols: SHM4 | SHM4 (serine hydroxymethyltransferase 4); catalytic/ glycine hydroxymethyltransferase/ pyridoxal phosphate binding | chr4:8048013-8050021 REVERSEweakly similar to ( 146) GLYM_PEA Serine hydroxymethyltransferase, mitochondrial precursor (EC 2.1.2.1) (Serine methylase) (Glycine hydroxymethyltransferase) (SHMT) - Pisum sativum (Garden pea)mod…	0	0	0	0	0	0	0	0	0	0
GRMZM2G452630	'1.2.5'	'PS.photorespiration.serine hydroxymethyltransferase'	'highly similar to ( 706) AT1G36370 | Symbols: SHM7 | SHM7 (serine hydroxymethyltransferase 7); catalytic/ glycine hydroxymethyltransferase/ pyridoxal phosphate binding | chr1:13696240-13698576 REVERSEmoderately similar to ( 466) GLYM_SOLTU Serine hydroxymethyltransferase, mitochondrial precursor (EC 2.1.2.1) (Serine methylase) (Glycine hydroxymethyltransferase) (SHMT) - Solanum tuberosum (Potato…	19.4	23.65	19.55	16.7	14.7	12.7	18.95	20.45	18.55	25.75
GRMZM2G018786	'1.2.7'	'PS.photorespiration.glycerate kinase'	'moderately similar to ( 420) AT1G80380 | Symbols: | phosphoribulokinase/uridine kinase-related | chr1:30217895-30219784 FORWARDmoderately similar to ( 484) loc_os01g48990 12001.m150688 protein protein Kinase C630.09c, putative, expressed seq=cds; coord=6:42609145..42613069:-1; parent_gene=GRMZM2G018786'	3.3	4.55	6.25	4.3	2	3.55	5.65	10	1.9	7.2
GRMZM2G054663	'1.2.7'	'PS.photorespiration.glycerate kinase'	'highly similar to ( 503) AT1G80380 | Symbols: | phosphoribulokinase/uridine kinase-related | chr1:30217895-30219784 FORWARDhighly similar to ( 606) loc_os01g48990 12001.m150688 protein protein Kinase C630.09c, putative, expressed seq=cds; coord=3:208055385..208058592:-1; parent_gene=GRMZM2G054663'	3.95	4.35	5.9	2.95	0.7	0.35	0.15	0.1	0.85	0.1
GRMZM2G301823	'1.3'	'PS.calvin cycle'	'weakly similar to ( 123) AT2G47400 | Symbols: CP12-1, CP12 | CP12-1 | chr2:19446889-19447263 FORWARDweakly similar to ( 162) loc_os03g19380 12003.m07355 protein CP12-2, putative, expressed seq=cds; coord=1:49130534..49131302:1; parent_gene=GRMZM2G301823'	15.5	13.85	37.5	22.9	13.65	12.05	21.8	28.75	15	24.4
GRMZM2G480850	'1.3'	'PS.calvin cycle'	'weakly similar to ( 103) AT2G47400 | Symbols: CP12-1, CP12 | CP12-1 | chr2:19446889-19447263 FORWARDweakly similar to ( 120) loc_os01g19740 12001.m08511 protein CP12-1, putative, expressed seq=cds; coord=9:7771309..7772076:-1; parent_gene=GRMZM2G480850'	0	0	0.1	0	0	0	0	0	0	0
GRMZM2G057171	'1.3.1'	'PS.calvin cycle.rubisco large subunit'	'moderately similar to ( 289) ATCG00490 | Symbols: RBCL | large subunit of RUBISCO. Protein is tyrosine-phosphorylated and its phosphorylation state is modulated in response to ABA in Arabidopsis thaliana seeds. | chrC:54958-56397 FORWARDmoderately similar to ( 306) RBL_MAIZE Ribulose bisphosphate carboxylase large chain precursor (EC 4.1.1.39) (RuBisCO large subunit) - Zea mays (Maize)moderately…	0	0	0	0	0	0	0	0	0	0
GRMZM2G083364	'1.3.1'	'PS.calvin cycle.rubisco large subunit'	'moderately similar to ( 270) ATCG00490 | Symbols: RBCL | large subunit of RUBISCO. Protein is tyrosine-phosphorylated and its phosphorylation state is modulated in response to ABA in Arabidopsis thaliana seeds. | chrC:54958-56397 FORWARDmoderately similar to ( 288) RBL_MAIZE Ribulose bisphosphate carboxylase large chain precursor (EC 4.1.1.39) (RuBisCO large subunit) - Zea mays (Maize)moderately…	0	0	0	0	0	0	0	0	0	0
GRMZM2G122563	'1.3.1'	'PS.calvin cycle.rubisco large subunit'	'moderately similar to ( 238) ATCG00490 | Symbols: RBCL | large subunit of RUBISCO. Protein is tyrosine-phosphorylated and its phosphorylation state is modulated in response to ABA in Arabidopsis thaliana seeds. | chrC:54958-56397 FORWARDmoderately similar to ( 257) RBL_SACOF Ribulose bisphosphate carboxylase large chain precursor (EC 4.1.1.39) (RuBisCO large subunit) - Saccharum officinarum (Sug…	0	0	0	0	0	0	0	0	0	0
GRMZM2G308907	'1.3.1'	'PS.calvin cycle.rubisco large subunit'	'highly similar to ( 502) ATCG00490 | Symbols: RBCL | large subunit of RUBISCO. Protein is tyrosine-phosphorylated and its phosphorylation state is modulated in response to ABA in Arabidopsis thaliana seeds. | chrC:54958-56397 FORWARDhighly similar to ( 545) RBL_MAIZE Ribulose bisphosphate carboxylase large chain precursor (EC 4.1.1.39) (RuBisCO large subunit) - Zea mays (Maize)highly similar to …	0	0	0	0	0	0	0	0	0	0
GRMZM2G345773	'1.3.1'	'PS.calvin cycle.rubisco large subunit'	'weakly similar to ( 137) ATCG00490 | Symbols: RBCL | large subunit of RUBISCO. Protein is tyrosine-phosphorylated and its phosphorylation state is modulated in response to ABA in Arabidopsis thaliana seeds. | chrC:54958-56397 FORWARDweakly similar to ( 151) RBL_MAIZE Ribulose bisphosphate carboxylase large chain precursor (EC 4.1.1.39) (RuBisCO large subunit) - Zea mays (Maize)weakly similar to …	0	0.05	0	0	0	0	0	0	0	0
GRMZM2G360821	'1.3.1'	'PS.calvin cycle.rubisco large subunit'	'highly similar to ( 877) ATCG00490 | Symbols: RBCL | large subunit of RUBISCO. Protein is tyrosine-phosphorylated and its phosphorylation state is modulated in response to ABA in Arabidopsis thaliana seeds. | chrC:54958-56397 FORWARDhighly similar to ( 944) RBL_MAIZE Ribulose bisphosphate carboxylase large chain precursor (EC 4.1.1.39) (RuBisCO large subunit) - Zea mays (Maize)highly similar to …	0	0.05	0	0.05	0	0	0	0	0	0
GRMZM2G385635	'1.3.1'	'PS.calvin cycle.rubisco large subunit'	'highly similar to ( 877) ATCG00490 | Symbols: RBCL | large subunit of RUBISCO. Protein is tyrosine-phosphorylated and its phosphorylation state is modulated in response to ABA in Arabidopsis thaliana seeds. | chrC:54958-56397 FORWARDhighly similar to ( 944) RBL_MAIZE Ribulose bisphosphate carboxylase large chain precursor (EC 4.1.1.39) (RuBisCO large subunit) - Zea mays (Maize)highly similar to …	0.3	0.45	0.35	0.1	0.3	0.45	0.5	0.15	0.4	0.25
GRMZM2G448344	'1.3.1'	'PS.calvin cycle.rubisco large subunit'	'highly similar to ( 877) ATCG00490 | Symbols: RBCL | large subunit of RUBISCO. Protein is tyrosine-phosphorylated and its phosphorylation state is modulated in response to ABA in Arabidopsis thaliana seeds. | chrC:54958-56397 FORWARDhighly similar to ( 944) RBL_MAIZE Ribulose bisphosphate carboxylase large chain precursor (EC 4.1.1.39) (RuBisCO large subunit) - Zea mays (Maize)highly similar to …	0.45	0.5	0.4	1.8	0.55	0.8	0.45	0.55	0.5	0.15
GRMZM2G450762	'1.3.1'	'PS.calvin cycle.rubisco large subunit'	'moderately similar to ( 290) ATCG00490 | Symbols: RBCL | large subunit of RUBISCO. Protein is tyrosine-phosphorylated and its phosphorylation state is modulated in response to ABA in Arabidopsis thaliana seeds. | chrC:54958-56397 FORWARDmoderately similar to ( 308) RBL_MAIZE Ribulose bisphosphate carboxylase large chain precursor (EC 4.1.1.39) (RuBisCO large subunit) - Zea mays (Maize)moderately…	0	0	0	0.05	0	0	0	0	0	0
GRMZM5G815453	'1.3.1'	'PS.calvin cycle.rubisco large subunit'	'highly similar to ( 877) ATCG00490 | Symbols: RBCL | large subunit of RUBISCO. Protein is tyrosine-phosphorylated and its phosphorylation state is modulated in response to ABA in Arabidopsis thaliana seeds. | chrC:54958-56397 FORWARDhighly similar to ( 944) RBL_MAIZE Ribulose bisphosphate carboxylase large chain precursor (EC 4.1.1.39) (RuBisCO large subunit) - Zea mays (Maize)highly similar to …	0	0	0	0	0	0	0	0	0	0
GRMZM2G026807	'1.3.11'	'PS.calvin cycle.RPE'	'moderately similar to ( 411) AT5G61410 | Symbols: RPE | RPE; catalytic/ ribulose-phosphate 3-epimerase | chr5:24684085-24685836 REVERSEmoderately similar to ( 449) RPE_ORYSA Ribulose-phosphate 3-epimerase, chloroplast precursor (EC 5.1.3.1) (Pentose-5-phosphate 3-epimerase) (PPE) (RPE) (R5P3E) - Oryza sativa (Rice)moderately similar to ( 449) loc_os03g07300 12003.m101203 protein ribulose-phospha…	13.7	16.1	20.35	14.7	14.8	15.95	21.3	20.9	15.4	27.65
GRMZM2G178960	'1.3.11'	'PS.calvin cycle.RPE'	'moderately similar to ( 432) AT5G61410 | Symbols: RPE | RPE; catalytic/ ribulose-phosphate 3-epimerase | chr5:24684085-24685836 REVERSEmoderately similar to ( 470) RPE_ORYSA Ribulose-phosphate 3-epimerase, chloroplast precursor (EC 5.1.3.1) (Pentose-5-phosphate 3-epimerase) (PPE) (RPE) (R5P3E) - Oryza sativa (Rice)moderately similar to ( 470) loc_os03g07300 12003.m101203 protein ribulose-phospha…	14.45	10.9	10.3	12.7	7.55	7.15	9.35	8.45	9.8	9.4
GRMZM2G026024	'1.3.12'	'PS.calvin cycle.PRK'	'highly similar to ( 629) AT1G32060 | Symbols: PRK | PRK (PHOSPHORIBULOKINASE); ATP binding / phosphoribulokinase/ protein binding | chr1:11532668-11534406 FORWARDhighly similar to ( 692) KPPR_WHEAT Phosphoribulokinase, chloroplast precursor (EC 2.7.1.19) (Phosphopentokinase) (PRKase) (PRK) - Triticum aestivum (Wheat)highly similar to ( 702) loc_os02g47020 12002.m09738 protein phosphoribulokinase…	0	0.35	1.45	0.15	0	0	0	0.05	0.15	0.05
GRMZM2G162529	'1.3.12'	'PS.calvin cycle.PRK'	'highly similar to ( 639) AT1G32060 | Symbols: PRK | PRK (PHOSPHORIBULOKINASE); ATP binding / phosphoribulokinase/ protein binding | chr1:11532668-11534406 FORWARDhighly similar to ( 733) KPPR_WHEAT Phosphoribulokinase, chloroplast precursor (EC 2.7.1.19) (Phosphopentokinase) (PRKase) (PRK) - Triticum aestivum (Wheat)highly similar to ( 735) loc_os02g47020 12002.m09738 protein phosphoribulokinase…	0	0.05	0.05	0	0	0	0	0	0.05	0.4
GRMZM2G463280	'1.3.12'	'PS.calvin cycle.PRK'	'moderately similar to ( 307) AT1G32060 | Symbols: PRK | PRK (PHOSPHORIBULOKINASE); ATP binding / phosphoribulokinase/ protein binding | chr1:11532668-11534406 FORWARDmoderately similar to ( 315) KPPR_MESCR Phosphoribulokinase, chloroplast precursor (EC 2.7.1.19) (Phosphopentokinase) (PRKase) (PRK) - Mesembryanthemum crystallinum (Common ice plant)moderately similar to ( 319) loc_os02g47020 12002…	1.35	1.7	2.75	1.3	0.9	0.9	1.15	2.6	1.25	2.85
GRMZM2G039345	'1.3.13'	'PS.calvin cycle.rubisco interacting'	'moderately similar to ( 294) AT1G73110 | Symbols: | ribulose bisphosphate carboxylase/oxygenase activase, putative / RuBisCO activase, putative | chr1:27494344-27496844 REVERSEmoderately similar to ( 202) RCA_MAIZE Ribulose bisphosphate carboxylase/oxygenase activase, chloroplast precursor (RuBisCO activase) (RA) - Zea mays (Maize)moderately similar to ( 344) loc_os04g56320 12004.m10522 protein …	21.2	15.8	18.85	19.75	15.1	14.45	14.35	21.7	18.1	14.8
GRMZM2G057093	'1.3.13'	'PS.calvin cycle.rubisco interacting'	'very weakly similar to (88.2) RUAP_SOYBN RuBisCO-associated protein - Glycine max (Soybean)moderately similar to ( 457) loc_os10g28050 12010.m05688 protein chitinase 2, putative, expressed seq=cds; coord=1:240756823..240757956:1; parent_gene=GRMZM2G057093'	0	0	0	0	0	0	0	0	0	0
GRMZM2G162200	'1.3.13'	'PS.calvin cycle.rubisco interacting'	'highly similar to ( 664) AT2G39730 | Symbols: RCA | RCA (RUBISCO ACTIVASE); ADP binding / ATP binding / enzyme regulator/ ribulose-1,5-bisphosphate carboxylase/oxygenase activator | chr2:16571174-16573345 REVERSEhighly similar to ( 870) RCA_MAIZE Ribulose bisphosphate carboxylase/oxygenase activase, chloroplast precursor (RuBisCO activase) (RA) - Zea mays (Maize)highly similar to ( 748) loc_os11…	0	0.1	0.5	0	0	0	0	0	0	0.2
GRMZM2G162282	'1.3.13'	'PS.calvin cycle.rubisco interacting'	'highly similar to ( 700) AT2G39730 | Symbols: RCA | RCA (RUBISCO ACTIVASE); ADP binding / ATP binding / enzyme regulator/ ribulose-1,5-bisphosphate carboxylase/oxygenase activator | chr2:16571174-16573345 REVERSEhighly similar to ( 701) RCA_ORYSA Ribulose bisphosphate carboxylase/oxygenase activase, chloroplast precursor (RuBisCO activase) (RA) - Oryza sativa (Rice)highly similar to ( 701) loc_o…	0	0	0	0	0	0	0	0	0	0
GRMZM2G162505	'1.3.13'	'PS.calvin cycle.rubisco interacting'	'very weakly similar to (85.9) RUAP_SOYBN RuBisCO-associated protein - Glycine max (Soybean)highly similar to ( 503) loc_os10g28050 12010.m05688 protein chitinase 2, putative, expressed seq=cds; coord=1:240766113..240767264:1; parent_gene=GRMZM2G162505'	0	0	0	0	0	0	0	0	0	0
GRMZM2G358153	'1.3.13'	'PS.calvin cycle.rubisco interacting'	'very weakly similar to (80.5) RUAP_SOYBN RuBisCO-associated protein - Glycine max (Soybean)moderately similar to ( 450) loc_os10g28120 12010.m05694 protein chitinase 1 precursor, putative, expressed seq=cds; coord=4:12082697..12084089:1; parent_gene=GRMZM2G358153'	0	0	0	0	0	0	0	0	0	0
GRMZM2G418752	'1.3.13'	'PS.calvin cycle.rubisco interacting'	'highly similar to ( 534) AT1G14030 | Symbols: | ribulose-1,5 bisphosphate carboxylase oxygenase large subunit N-methyltransferase, putative | chr1:4805493-4807440 REVERSEhighly similar to ( 531) RBCMT_TOBAC Ribulose-1,5 bisphosphate carboxylase/oxygenase large subunit N-methyltransferase, chloroplast precursor (EC 2.1.1.127) ([Ribulose-bisphosphate carboxylase]-lysine N-methyltransferase) (RuBis…	6.2	7.25	5.95	5.75	5.6	5.55	6.2	7.5	6.5	5.45
GRMZM5G807767	'1.3.13'	'PS.calvin cycle.rubisco interacting'	'moderately similar to ( 434) AT4G20130 | Symbols: PTAC14 | PTAC14 (PLASTID TRANSCRIPTIONALLY ACTIVE14) | chr4:10878914-10881697 FORWARDhighly similar to ( 551) loc_os05g50980 12005.m09165 protein SET domain containing protein, expressed seq=cds; coord=8:76493336..76498256:1; parent_gene=GRMZM5G807767'	47.2	37.75	42.3	35.65	24.2	30.55	27.8	45.5	33.55	24.95
GRMZM2G098520	'1.3.2'	'PS.calvin cycle.rubisco small subunit'	'moderately similar to ( 228) AT1G67090 | Symbols: RBCS1A | RBCS1A (RIBULOSE BISPHOSPHATE CARBOXYLASE SMALL CHAIN 1A); copper ion binding / ribulose-bisphosphate carboxylase | chr1:25048590-25049249 REVERSEmoderately similar to ( 357) RBS_MAIZE Ribulose bisphosphate carboxylase small chain, chloroplast precursor (EC 4.1.1.39) (RuBisCO small subunit) - Zea mays (Maize)moderately similar to ( 281) …	2.45	6.8	18.55	5.95	3.8	2.3	19.85	23.7	3.6	16.25	ribulose bisphosphate carboxylase small subunit1
GRMZM2G113033	'1.3.2'	'PS.calvin cycle.rubisco small subunit'	'moderately similar to ( 228) AT1G67090 | Symbols: RBCS1A | RBCS1A (RIBULOSE BISPHOSPHATE CARBOXYLASE SMALL CHAIN 1A); copper ion binding / ribulose-bisphosphate carboxylase | chr1:25048590-25049249 REVERSEmoderately similar to ( 344) RBS_MAIZE Ribulose bisphosphate carboxylase small chain, chloroplast precursor (EC 4.1.1.39) (RuBisCO small subunit) - Zea mays (Maize)moderately similar to ( 283) …	0.15	0.7	4.25	0.3	0.2	0.1	0.15	0.3	0.35	1.45	ribulose bisphosphate carboxylase small subunit2
GRMZM2G003724	'1.3.3'	'PS.calvin cycle.phosphoglycerate kinase'	'weakly similar to ( 137) AT3G12780 | Symbols: PGK1 | PGK1 (PHOSPHOGLYCERATE KINASE 1); phosphoglycerate kinase | chr3:4061127-4063140 REVERSEweakly similar to ( 137) PGKH_SPIOL Phosphoglycerate kinase, chloroplast precursor (EC 2.7.2.3) (Fragment) - Spinacia oleracea (Spinach)highly similar to ( 739) loc_os10g30550 12010.m05915 protein phosphoglycerate kinase, chloroplast precursor, putative, ex…	7.3	7.7	7.35	6.05	5.35	5.25	4.95	5	8.15	6.45
GRMZM2G047028	'1.3.3'	'PS.calvin cycle.phosphoglycerate kinase'	'moderately similar to ( 376) AT1G56190 | Symbols: | phosphoglycerate kinase, putative | chr1:21028622-21030454 FORWARDmoderately similar to ( 385) PGKH_TOBAC Phosphoglycerate kinase, chloroplast precursor (EC 2.7.2.3) - Nicotiana tabacum (Common tobacco)moderately similar to ( 397) loc_os05g41640 12005.m08338 protein phosphoglycerate kinase, chloroplast precursor, putative, expressed seq=cds; co…	40.55	43.15	54.95	45.3	57.3	50.7	45	52.65	57.3	51.05
GRMZM2G089136	'1.3.3'	'PS.calvin cycle.phosphoglycerate kinase'	'highly similar to ( 718) AT1G56190 | Symbols: | phosphoglycerate kinase, putative | chr1:21028622-21030454 FORWARDhighly similar to ( 761) PGKH_WHEAT Phosphoglycerate kinase, chloroplast precursor (EC 2.7.2.3) - Triticum aestivum (Wheat)highly similar to ( 778) loc_os05g41640 12005.m08338 protein phosphoglycerate kinase, chloroplast precursor, putative, expressed seq=cds; coord=6:156256123..1562…	26.75	27.25	24.05	21.7	22.05	21.7	18.1	16.8	23.35	18.5
GRMZM2G382914	'1.3.3'	'PS.calvin cycle.phosphoglycerate kinase'	'highly similar to ( 656) AT1G79550 | Symbols: PGK | PGK (PHOSPHOGLYCERATE KINASE); phosphoglycerate kinase | chr1:29924347-29926295 REVERSEhighly similar to ( 694) PGKY_WHEAT Phosphoglycerate kinase, cytosolic (EC 2.7.2.3) - Triticum aestivum (Wheat)highly similar to ( 707) loc_os02g07260 12002.m33575 protein phosphoglycerate kinase, cytosolic, putative, expressed seq=cds; coord=5:84822215..8482…	220.9	268.75	275.6	245.65	319.25	401.5	312.2	320.9	238.35	286.85
GRMZM2G035268	'1.3.4'	'PS.calvin cycle.GAP'	'highly similar to ( 895) AT2G24270 | Symbols: ALDH11A3 | ALDH11A3; 3-chloroallyl aldehyde dehydrogenase/ glyceraldehyde-3-phosphate dehydrogenase (NADP+) | chr2:10327325-10329601 REVERSEhighly similar to ( 979) GAPN_MAIZE NADP-dependent glyceraldehyde-3-phosphate dehydrogenase (EC 1.2.1.9) (Non-phosphorylating glyceraldehyde 3-phosphate dehydrogenase) (Glyceraldehyde-3-phosphate dehydrogenase [N…	16.35	18.75	12.1	13.65	5.25	3.55	4.4	3.15	7.35	2.4
GRMZM2G039723	'1.3.4'	'PS.calvin cycle.GAP'	'highly similar to ( 575) AT3G26650 | Symbols: GAPA, GAPA-1 | GAPA (GLYCERALDEHYDE 3-PHOSPHATE DEHYDROGENASE A SUBUNIT); glyceraldehyde-3-phosphate dehydrogenase/ protein binding | chr3:9795226-9796848 FORWARDhighly similar to ( 670) G3PA_MAIZE Glyceraldehyde-3-phosphate dehydrogenase A, chloroplast precursor (EC 1.2.1.13) (NADP-dependent glyceraldehydephosphate dehydrogenase subunit A) - Zea may…	0	0	0	0	0	0	0	0	0	0
GRMZM2G162845	'1.3.4'	'PS.calvin cycle.GAP'	'highly similar to ( 582) AT3G26650 | Symbols: GAPA, GAPA-1 | GAPA (GLYCERALDEHYDE 3-PHOSPHATE DEHYDROGENASE A SUBUNIT); glyceraldehyde-3-phosphate dehydrogenase/ protein binding | chr3:9795226-9796848 FORWARDhighly similar to ( 680) G3PA_MAIZE Glyceraldehyde-3-phosphate dehydrogenase A, chloroplast precursor (EC 1.2.1.13) (NADP-dependent glyceraldehydephosphate dehydrogenase subunit A) - Zea may…	0	0	0	0	0	0	0	0	0	0
GRMZM2G337113	'1.3.4'	'PS.calvin cycle.GAP'	'moderately similar to ( 371) AT1G12900 | Symbols: GAPA-2 | GAPA-2 (GLYCERALDEHYDE 3-PHOSPHATE DEHYDROGENASE A SUBUNIT 2); NAD or NADH binding / binding / catalytic/ glyceraldehyde-3-phosphate dehydrogenase (phosphorylating)/ glyceraldehyde-3-phosphate dehydrogenase | chr1:4392634-4393850 REVERSEmoderately similar to ( 473) G3PA_MAIZE Glyceraldehyde-3-phosphate dehydrogenase A, chloroplast precur…	0.05	0.85	5.75	0.55	0.3	0.3	0.1	0.45	0.45	2.4	glyceraldehyde-3-phosphate dehydrogenase1
GRMZM5G821433	'1.3.4'	'PS.calvin cycle.GAP'	'highly similar to ( 526) AT3G26650 | Symbols: GAPA, GAPA-1 | GAPA (GLYCERALDEHYDE 3-PHOSPHATE DEHYDROGENASE A SUBUNIT); glyceraldehyde-3-phosphate dehydrogenase/ protein binding | chr3:9795226-9796848 FORWARDhighly similar to ( 595) G3PA_MAIZE Glyceraldehyde-3-phosphate dehydrogenase A, chloroplast precursor (EC 1.2.1.13) (NADP-dependent glyceraldehydephosphate dehydrogenase subunit A) - Zea may…	0	0	0	0	0	0	0	0	0	0
GRMZM5G845611	'1.3.4'	'PS.calvin cycle.GAP'	'highly similar to ( 645) AT1G42970 | Symbols: GAPB | GAPB (GLYCERALDEHYDE-3-PHOSPHATE DEHYDROGENASE B SUBUNIT); glyceraldehyde-3-phosphate dehydrogenase (NADP+)/ glyceraldehyde-3-phosphate dehydrogenase | chr1:16127552-16129584 FORWARDhighly similar to ( 665) G3PB_PEA Glyceraldehyde-3-phosphate dehydrogenase B, chloroplast precursor (EC 1.2.1.13) (NADP-dependent glyceraldehydephosphate dehydroge…	0.3	1.15	4.1	1.2	0.35	0.25	2.15	1.5	0.45	2.35
GRMZM2G046284	'1.3.6'	'PS.calvin cycle.aldolase'	'highly similar to ( 629) AT4G38970 | Symbols: | fructose-bisphosphate aldolase, putative | chr4:18163769-18165659 REVERSEhighly similar to ( 710) ALFC_ORYSA Fructose-bisphosphate aldolase, chloroplast precursor (EC 4.1.2.13) (ALDP) - Oryza sativa (Rice)highly similar to ( 710) loc_os11g07020 12011.m28744 protein fructose-bisphosphate aldolase, chloroplast precursor, putative, expressed seq=cds; …	0	0.15	4.05	0.1	0.1	0.05	0.1	0.1	0.1	0.4
GRMZM2G069195	'1.3.6'	'PS.calvin cycle.aldolase'	'highly similar to ( 607) AT2G01140 | Symbols: | fructose-bisphosphate aldolase, putative | chr2:95006-96491 REVERSEhighly similar to ( 561) ALFC_PEA Fructose-bisphosphate aldolase 1, chloroplast precursor (EC 4.1.2.13) (Fragment) - Pisum sativum (Garden pea)highly similar to ( 672) loc_os01g02880 12001.m06927 protein fructose-bisphosphate aldolase, chloroplast precursor, putative, expressed seq=…	2.05	2.75	2	1.9	1.35	1.45	1.85	1.75	1.1	2.3
GRMZM2G089365	'1.3.6'	'PS.calvin cycle.aldolase'	'highly similar to ( 630) AT2G01140 | Symbols: | fructose-bisphosphate aldolase, putative | chr2:95006-96491 REVERSEhighly similar to ( 582) ALFC_PEA Fructose-bisphosphate aldolase 1, chloroplast precursor (EC 4.1.2.13) (Fragment) - Pisum sativum (Garden pea)highly similar to ( 710) loc_os01g02880 12001.m06927 protein fructose-bisphosphate aldolase, chloroplast precursor, putative, expressed seq=…	52.55	43.75	53.2	65.25	48.45	47.95	60.4	58.85	48.5	67.2
GRMZM2G155253	'1.3.6'	'PS.calvin cycle.aldolase'	'highly similar to ( 624) AT4G38970 | Symbols: | fructose-bisphosphate aldolase, putative | chr4:18163769-18165659 REVERSEhighly similar to ( 665) ALFC_ORYSA Fructose-bisphosphate aldolase, chloroplast precursor (EC 4.1.2.13) (ALDP) - Oryza sativa (Rice)highly similar to ( 665) loc_os11g07020 12011.m28744 protein fructose-bisphosphate aldolase, chloroplast precursor, putative, expressed seq=cds; …	0.5	1.2	3	1.05	0.6	0.45	1.6	2.25	1.05	3.75
GRMZM2G407406	'1.3.6'	'PS.calvin cycle.aldolase'	'weakly similar to ( 160) AT2G01140 | Symbols: | fructose-bisphosphate aldolase, putative | chr2:95006-96491 REVERSEweakly similar to ( 143) ALFD_PEA Fructose-bisphosphate aldolase 2, chloroplast (EC 4.1.2.13) - Pisum sativum (Garden pea)weakly similar to ( 170) loc_os01g02880 12001.m06927 protein fructose-bisphosphate aldolase, chloroplast precursor, putative, expressed seq=cds; coord=5:14500792…	0	0	0	0	0	0	0	0	0	0
GRMZM2G095287	'1.3.7'	'PS.calvin cycle.FBPase'	'moderately similar to ( 498) AT5G64380 | Symbols: | fructose-1,6-bisphosphatase family protein | chr5:25741342-25743024 FORWARDmoderately similar to ( 271) F16P1_SPIOL Fructose-1,6-bisphosphatase, chloroplast precursor (EC 3.1.3.11) (D-fructose-1,6-bisphosphate 1-phosphohydrolase) (FBPase) - Spinacia oleracea (Spinach)highly similar to ( 573) loc_os06g45370 12006.m09064 protein fructose-1,6-bisp…	17.35	17.6	19.1	15.7	22.9	20.15	20	22.85	12.4	34.05
GRMZM2G306732	'1.3.7'	'PS.calvin cycle.FBPase'	'highly similar to ( 585) AT3G54050 | Symbols: | fructose-1,6-bisphosphatase, putative / D-fructose-1,6-bisphosphate 1-phosphohydrolase, putative / FBPase, putative | chr3:20016951-20018527 FORWARDhighly similar to ( 647) F16P1_ORYSA Fructose-1,6-bisphosphatase, chloroplast precursor (EC 3.1.3.11) (D-fructose-1,6-bisphosphate 1-phosphohydrolase) (FBPase) - Oryza sativa (Rice)highly similar to ( 6…	0.2	0.65	3.85	0.2	0.2	0.05	0.05	1.6	0.05	1.6
GRMZM2G010494	'1.3.8'	'PS.calvin cycle.transketolase'	'nearly identical (1041) AT2G45290 | Symbols: | transketolase, putative | chr2:18672737-18675589 FORWARDnearly identical (1063) TKTC_SOLTU Transketolase, chloroplast precursor (EC 2.2.1.1) (TK) - Solanum tuberosum (Potato)nearly identical (1149) loc_os04g19740 12004.m07133 protein transketolase, chloroplast precursor, putative, expressed seq=cds; coord=2:86650928..86654660:1; parent_gene=GRMZM2G0…	0.15	0.4	0.5	0	0.1	0.1	0.1	0.05	0.15	0.05
GRMZM2G033208	'1.3.8'	'PS.calvin cycle.transketolase'	'nearly identical (1148) AT3G60750 | Symbols: | transketolase, putative | chr3:22454004-22456824 FORWARDnearly identical (1289) TKTC_MAIZE Transketolase, chloroplast (EC 2.2.1.1) (TK) - Zea mays (Maize)nearly identical (1204) loc_os06g04270 12006.m05156 protein transketolase, chloroplast precursor, putative, expressed seq=cds; coord=9:22779373..22783918:1; parent_gene=GRMZM2G033208'	178.75	182.55	168.25	217.45	202.55	227.3	250.9	170.4	204.35	205.9
AC147602.5_FG004	'1.3.9'	'PS.calvin cycle.seduheptulose bisphosphatase'	'weakly similar to ( 181) AT3G55800 | Symbols: SBPASE | SBPASE (sedoheptulose-bisphosphatase); phosphoric ester hydrolase/ sedoheptulose-bisphosphatase | chr3:20709640-20711421 FORWARDmoderately similar to ( 253) S17P_WHEAT Sedoheptulose-1,7-bisphosphatase, chloroplast precursor (EC 3.1.3.37) (Sedoheptulose-bisphosphatase) (SBPase) (SED(1,7)P2ase) - Triticum aestivum (Wheat)moderately similar to …	0	0	0.05	0	0	0	0	0	0	0
GRMZM5G814089	'1.3.9'	'PS.calvin cycle.seduheptulose bisphosphatase'	'weakly similar to ( 137) AT3G55800 | Symbols: SBPASE | SBPASE (sedoheptulose-bisphosphatase); phosphoric ester hydrolase/ sedoheptulose-bisphosphatase | chr3:20709640-20711421 FORWARDweakly similar to ( 148) S17P_WHEAT Sedoheptulose-1,7-bisphosphatase, chloroplast precursor (EC 3.1.3.37) (Sedoheptulose-bisphosphatase) (SBPase) (SED(1,7)P2ase) - Triticum aestivum (Wheat)weakly similar to ( 153) l…	0	0.45	1.25	0.05	0.1	0	0.1	0.15	0.3	0.25
AC226723.2_FG001	'1.5.1'	'PS.carbon concentrating mechanism.C4'	'very weakly similar to (90.9) AT5G11670 | Symbols: ATNADP-ME2 | ATNADP-ME2 (NADP-malic enzyme 2); malate dehydrogenase (oxaloacetate-decarboxylating) (NADP+)/ malic enzyme/ oxidoreductase, acting on NADH or NADPH, NAD or NADP as acceptor | chr5:3754456-3758040 FORWARDvery weakly similar to (95.1) MAOX_MESCR NADP-dependent malic enzyme (EC 1.1.1.40) (NADP-ME) - Mesembryanthemum crystallinum (Comm…	0	0	0	0	0	0	0	0	0	0
GRMZM2G008642	'1.5.1'	'PS.carbon concentrating mechanism.C4'	'moderately similar to ( 207) AT3G01550 | Symbols: ATPPT2, PPT2 | PPT2 (PHOSPHOENOLPYRUVATE (PEP)/PHOSPHATE TRANSLOCATOR 2); antiporter/ triose-phosphate transmembrane transporter | chr3:216947-218856 REVERSEweakly similar to ( 146) TPT_PEA Triose phosphate/phosphate translocator, chloroplast precursor (cTPT) (p36) (E30) - Pisum sativum (Garden pea)moderately similar to ( 385) loc_os05g07870 1200…	1.2	1.2	1.65	1.7	0.4	0.75	0.05	1.45	0.15	0.85
GRMZM2G009223	'1.5.1'	'PS.carbon concentrating mechanism.C4'	'moderately similar to ( 484) AT1G61800 | Symbols: GPT2 | GPT2; antiporter/ glucose-6-phosphate transmembrane transporter | chr1:22824527-22826459 FORWARDmoderately similar to ( 227) TPT_PEA Triose phosphate/phosphate translocator, chloroplast precursor (cTPT) (p36) (E30) - Pisum sativum (Garden pea)highly similar to ( 545) loc_os07g34006 12007.m07659 protein glucose-6-phosphate/phosphate translo…	0.5	0.95	4.55	1.5	2	0.25	1.3	2.8	1.9	2.4
GRMZM2G047404	'1.5.1'	'PS.carbon concentrating mechanism.C4'	'moderately similar to ( 482) AT5G33320 | Symbols: CUE1, PPT, ARAPPT | CUE1 (CAB UNDEREXPRESSED 1); antiporter/ triose-phosphate transmembrane transporter | chr5:12588950-12591408 FORWARDmoderately similar to ( 225) TPT_PEA Triose phosphate/phosphate translocator, chloroplast precursor (cTPT) (p36) (E30) - Pisum sativum (Garden pea)highly similar to ( 593) loc_os09g12600 12009.m22060 protein trio…	56.35	95	65.75	52	49.3	50.85	60.5	46.95	42.35	38.75
GRMZM2G054378	'1.5.1'	'PS.carbon concentrating mechanism.C4'	'moderately similar to ( 264) AT5G17660 | Symbols: | tRNA (guanine-N7-)-methyltransferase | chr5:5818778-5820811 REVERSEmoderately similar to ( 389) loc_os01g35170 12001.m09819 protein tRNA (guanine-N(1)-)-methyltransferase, putative, expressed seq=cds; coord=5:10731..23193:-1; parent_gene=GRMZM2G054378'	61.85	63.75	67.55	52.6	55.05	40.9	34.5	53.75	69.65	49.05
GRMZM2G062042	'1.5.1'	'PS.carbon concentrating mechanism.C4'	'moderately similar to ( 314) AT3G08530 | Symbols: | clathrin heavy chain, putative | chr3:2587171-2595411 REVERSEweakly similar to ( 145) CAPP1_MAIZE Phosphoenolpyruvate carboxylase 1 (EC 4.1.1.31) (PEPCase 1) (PEPC 1) - Zea mays (Maize)moderately similar to ( 345) loc_os11g01380 12011.m04343 protein clathrin heavy chain, putative, expressed seq=cds; coord=8:87520221..87524411:1; parent_gene=GRM…	0	0	0	0	0	0	0	0	0	0
GRMZM2G066413	'1.5.1'	'PS.carbon concentrating mechanism.C4'	'moderately similar to ( 375) AT5G33320 | Symbols: CUE1, PPT, ARAPPT | CUE1 (CAB UNDEREXPRESSED 1); antiporter/ triose-phosphate transmembrane transporter | chr5:12588950-12591408 FORWARDweakly similar to ( 179) TPT_SOLTU Triose phosphate/phosphate translocator, chloroplast precursor (cTPT) (E29) - Solanum tuberosum (Potato)moderately similar to ( 492) loc_os01g07730 12001.m07400 protein triose p…	0.2	0.45	0.45	0.35	0.95	1	2.45	2.05	0.75	1.5
GRMZM2G069542	'1.5.1'	'PS.carbon concentrating mechanism.C4'	'nearly identical (1584) AT3G14940 | Symbols: ATPPC3 | ATPPC3 (PHOSPHOENOLPYRUVATE CARBOXYLASE 3); phosphoenolpyruvate carboxylase | chr3:5025584-5029476 FORWARDnearly identical (1845) CAPP1_SORBI Phosphoenolpyruvate carboxylase 1 (EC 4.1.1.31) (PEPCase 1) (PEPC 1) (CP21) - Sorghum bicolor (Sorghum) (Sorghum vulgare)nearly identical (1788) loc_os02g14770 12002.m100156 protein phosphoenolpyruvate …	62.15	56.55	72.45	68.95	63.4	73	69.6	49.65	87.25	128.45
GRMZM2G070605	'1.5.1'	'PS.carbon concentrating mechanism.C4'	'moderately similar to ( 488) AT5G46110 | Symbols: APE2, TPT | APE2 (ACCLIMATION OF PHOTOSYNTHESIS TO ENVIRONMENT 2); antiporter/ triose-phosphate transmembrane transporter | chr5:18697606-18700223 FORWARDhighly similar to ( 566) TPT_MAIZE Triose phosphate/phosphate translocator, chloroplast precursor (cTPT) - Zea mays (Maize)highly similar to ( 524) loc_os01g13770 12001.m150534 protein triose ph…	34.7	21.7	33.1	27.45	34.75	26.6	20.35	30.4	33.6	16.35
GRMZM2G074122	'1.5.1'	'PS.carbon concentrating mechanism.C4'	'nearly identical (1590) AT1G53310 | Symbols: ATPPC1 | ATPPC1 (PHOSPHOENOLPYRUVATE CARBOXYLASE 1); catalytic/ phosphoenolpyruvate carboxylase | chr1:19884261-19888070 REVERSEnearly identical (1848) CAPP1_SORBI Phosphoenolpyruvate carboxylase 1 (EC 4.1.1.31) (PEPCase 1) (PEPC 1) (CP21) - Sorghum bicolor (Sorghum) (Sorghum vulgare)nearly identical (1797) loc_os02g14770 12002.m100156 protein phospho…	48.4	31.5	45.9	57.3	39.95	42.4	44.05	32.05	64.8	50.5
GRMZM2G082780	'1.5.1'	'PS.carbon concentrating mechanism.C4'	'nearly identical (1378) AT1G68750 | Symbols: ATPPC4 | ATPPC4; phosphoenolpyruvate carboxylase | chr1:25822942-25828104 REVERSEhighly similar to ( 618) CAPP2_CHLRE Phosphoenolpyruvate carboxylase 2 (EC 4.1.1.31) (PEP carboxylase 2) (PEPCase 2) (PEPC 2) - Chlamydomonas reinhardtiinearly identical (1632) loc_os01g02050 12001.m06847 protein phosphoenolpyruvate carboxylase 4, putative, expressed seq=…	0.25	0.3	0.3	0.15	0	0	0.05	0.3	0.05	0
GRMZM2G083344	'1.5.1'	'PS.carbon concentrating mechanism.C4'	'moderately similar to ( 242) AT5G46110 | Symbols: APE2, TPT | APE2 (ACCLIMATION OF PHOTOSYNTHESIS TO ENVIRONMENT 2); antiporter/ triose-phosphate transmembrane transporter | chr5:18697606-18700223 FORWARDmoderately similar to ( 249) TPT_MAIZE Triose phosphate/phosphate translocator, chloroplast precursor (cTPT) - Zea mays (Maize)moderately similar to ( 254) loc_os05g15160 12005.m05925 protein tr…	237.45	174.2	257.85	298.95	308.65	369.5	451.5	369.1	287.5	403.3
GRMZM2G083841	'1.5.1'	'PS.carbon concentrating mechanism.C4'	'nearly identical (1508) AT2G42600 | Symbols: ATPPC2 | ATPPC2 (PHOSPHOENOLPYRUVATE CARBOXYLASE 2); catalytic/ phosphoenolpyruvate carboxylase | chr2:17734541-17738679 REVERSEnearly identical (1912) CAPP1_MAIZE Phosphoenolpyruvate carboxylase 1 (EC 4.1.1.31) (PEPCase 1) (PEPC 1) - Zea mays (Maize)nearly identical (1566) loc_os02g14770 12002.m100156 protein phosphoenolpyruvate carboxylase 1, putati…	0	0	0	0	0	0	0	0	0.05	0	phosphoenolpyruvate carboxylase1
GRMZM2G085019	'1.5.1'	'PS.carbon concentrating mechanism.C4'	'highly similar to ( 842) AT1G79750 | Symbols: ATNADP-ME4 | ATNADP-ME4 (NADP-malic enzyme 4); malate dehydrogenase (oxaloacetate-decarboxylating) (NADP+)/ malic enzyme/ oxidoreductase, acting on NADH or NADPH, NAD or NADP as acceptor | chr1:30007655-30011179 REVERSEnearly identical (1136) MAOC_MAIZE NADP-dependent malic enzyme, chloroplast precursor (EC 1.1.1.40) (NADP-ME) - Zea mays (Maize)highl…	15.25	8.95	12.15	13.25	13.05	8.25	6.95	7.9	19.15	7.4	NADP malic enzyme3
GRMZM2G085747	'1.5.1'	'PS.carbon concentrating mechanism.C4'	'highly similar to ( 784) AT4G00570 | Symbols: | malate oxidoreductase, putative | chr4:242817-246522 REVERSEhighly similar to ( 797) MAON_SOLTU NAD-dependent malic enzyme 59 kDa isoform, mitochondrial precursor (EC 1.1.1.39) (NAD-ME) - Solanum tuberosum (Potato)highly similar to ( 968) loc_os10g35960 12010.m50425 protein NAD-dependent malic enzyme 59 kDa isoform, mitochondrial precursor, putativ…	98.05	71.05	144.75	105.95	177.15	197.45	160.05	194.45	180.85	200.5
GRMZM2G094165	'1.5.1'	'PS.carbon concentrating mechanism.C4'	'moderately similar to ( 244) AT5G14740 | Symbols: CA2, CA18, BETA CA2 | CA2 (CARBONIC ANHYDRASE 2); carbonate dehydratase/ zinc ion binding | chr5:4758257-4762315 FORWARDmoderately similar to ( 346) CAHC_HORVU Carbonic anhydrase, chloroplast precursor (EC 4.2.1.1) (Carbonate dehydratase) - Hordeum vulgare (Barley)moderately similar to ( 354) loc_os01g45274 12001.m150428 protein carbonic anhydras…	0.35	0.1	1.45	0.25	0.15	0.1	0.85	1.1	0.7	2
GRMZM2G097457	'1.5.1'	'PS.carbon concentrating mechanism.C4'	'nearly identical (1434) AT4G15530 | Symbols: PPDK | PPDK (pyruvate orthophosphate dikinase); kinase/ pyruvate, phosphate dikinase | chr4:8864828-8870748 REVERSEnearly identical (1684) PPDK_MAIZE Pyruvate, phosphate dikinase, chloroplast precursor (EC 2.7.9.1) (Pyruvate, orthophosphate dikinase) - Zea mays (Maize)nearly identical (1625) loc_os05g33570 12005.m083718 protein pyruvate, phosphate dik…	27.15	14.55	38.6	17.6	8	13.5	2.45	0.4	19.4	5.2
GRMZM2G103047	'1.5.1'	'PS.carbon concentrating mechanism.C4'	'moderately similar to ( 464) AT5G33320 | Symbols: CUE1, PPT, ARAPPT | CUE1 (CAB UNDEREXPRESSED 1); antiporter/ triose-phosphate transmembrane transporter | chr5:12588950-12591408 FORWARDmoderately similar to ( 223) TPT_PEA Triose phosphate/phosphate translocator, chloroplast precursor (cTPT) (p36) (E30) - Pisum sativum (Garden pea)highly similar to ( 579) loc_os09g12600 12009.m22060 protein trio…	61.9	121.35	79.75	67.1	74.2	79.3	81.55	87.55	69.05	87.1
GRMZM2G110714	'1.5.1'	'PS.carbon concentrating mechanism.C4'	'nearly identical (1637) AT3G14940 | Symbols: ATPPC3 | ATPPC3 (PHOSPHOENOLPYRUVATE CARBOXYLASE 3); phosphoenolpyruvate carboxylase | chr3:5025584-5029476 FORWARDnearly identical (1880) CAPP1_SACHY Phosphoenolpyruvate carboxylase, housekeeping isozyme (EC 4.1.1.31) (PEPCase) (PEPC) - Saccharum hybrid (Sugarcane)nearly identical (1692) loc_os01g55350 12001.m11694 protein phosphoenolpyruvate carboxy…	133.5	219.65	85.9	115.2	51.7	41.85	34.15	29	84.7	41.55
GRMZM2G118770	'1.5.1'	'PS.carbon concentrating mechanism.C4'	'highly similar to ( 875) AT2G19900 | Symbols: ATNADP-ME1 | ATNADP-ME1 (NADP-malic enzyme 1); malate dehydrogenase (oxaloacetate-decarboxylating) (NADP+)/ malic enzyme/ oxidoreductase, acting on NADH or NADPH, NAD or NADP as acceptor | chr2:8592106-8595403 REVERSEhighly similar to ( 895) MAOX_VITVI NADP-dependent malic enzyme (EC 1.1.1.40) (NADP-ME) - Vitis vinifera (Grape)nearly identical (1007)…	0.7	0.35	0.4	0.35	0.1	0.1	0	0.05	0.25	0.05
GRMZM2G121878	'1.5.1'	'PS.carbon concentrating mechanism.C4'	'moderately similar to ( 245) AT5G14740 | Symbols: CA2, CA18, BETA CA2 | CA2 (CARBONIC ANHYDRASE 2); carbonate dehydratase/ zinc ion binding | chr5:4758257-4762315 FORWARDmoderately similar to ( 340) CAHC_HORVU Carbonic anhydrase, chloroplast precursor (EC 4.2.1.1) (Carbonate dehydratase) - Hordeum vulgare (Barley)moderately similar to ( 340) loc_os01g45274 12001.m150428 protein carbonic anhydras…	0.05	0.25	1.5	0.1	0.1	0.05	0	0.35	0	1.75
GRMZM2G122479	'1.5.1'	'PS.carbon concentrating mechanism.C4'	'highly similar to ( 838) AT1G79750 | Symbols: ATNADP-ME4 | ATNADP-ME4 (NADP-malic enzyme 4); malate dehydrogenase (oxaloacetate-decarboxylating) (NADP+)/ malic enzyme/ oxidoreductase, acting on NADH or NADPH, NAD or NADP as acceptor | chr1:30007655-30011179 REVERSEhighly similar to ( 944) MAOC_ORYSA NADP-dependent malic enzyme, chloroplast precursor (EC 1.1.1.40) (NADP-ME) - Oryza sativa (Rice)h…	246.1	215.75	241.25	255.25	187.65	203.95	240.75	257.35	256.9	174.25
GRMZM2G125850	'1.5.1'	'PS.carbon concentrating mechanism.C4'	'moderately similar to ( 480) AT1G61800 | Symbols: GPT2 | GPT2; antiporter/ glucose-6-phosphate transmembrane transporter | chr1:22824527-22826459 FORWARDmoderately similar to ( 229) TPT_PEA Triose phosphate/phosphate translocator, chloroplast precursor (cTPT) (p36) (E30) - Pisum sativum (Garden pea)highly similar to ( 515) loc_os07g34006 12007.m07659 protein glucose-6-phosphate/phosphate translo…	1.6	2.95	2.45	2.5	1.1	0.4	2	3	1.1	1.05
GRMZM2G141725	'1.5.1'	'PS.carbon concentrating mechanism.C4'	'weakly similar to ( 141) AT3G16830 | Symbols: TPR2 | TPR2 (TOPLESS-RELATED 2) | chr3:5731709-5737531 FORWARDweakly similar to ( 167) loc_os03g11110 12003.m06562 protein metal ion binding protein, putative, expressed seq=cds; coord=8:106042330..106046834:-1; parent_gene=GRMZM2G141725'	0	0	0	0	0	0	0	0	0	0
GRMZM2G145101	'1.5.1'	'PS.carbon concentrating mechanism.C4'	'moderately similar to ( 312) AT4G33580 | Symbols: ATBCA5, BCA5 | carbonic anhydrase family protein / carbonate dehydratase family protein | chr4:16139406-16141363 FORWARDweakly similar to ( 197) CAHC_PEA Carbonic anhydrase, chloroplast precursor (EC 4.2.1.1) (Carbonate dehydratase) [Contains: Carbonic anhydrase, 27 kDa isoform; Carbonic anhydrase, 25 kDa isoform] - Pisum sativum (Garden pea)mode…	20.15	16.2	28.8	22.5	43.7	42.2	34.05	45.15	29.65	46.7
GRMZM2G159724	'1.5.1'	'PS.carbon concentrating mechanism.C4'	'highly similar to ( 940) AT5G11670 | Symbols: ATNADP-ME2 | ATNADP-ME2 (NADP-malic enzyme 2); malate dehydrogenase (oxaloacetate-decarboxylating) (NADP+)/ malic enzyme/ oxidoreductase, acting on NADH or NADPH, NAD or NADP as acceptor | chr5:3754456-3758040 FORWARDhighly similar to ( 977) MAOX_VITVI NADP-dependent malic enzyme (EC 1.1.1.40) (NADP-ME) - Vitis vinifera (Grape)nearly identical (1080)…	22.7	15.95	18.35	20.05	5.15	5.8	8.4	19.7	6.3	9.55
GRMZM2G174107	'1.5.1'	'PS.carbon concentrating mechanism.C4'	'moderately similar to ( 475) AT5G33320 | Symbols: CUE1, PPT, ARAPPT | CUE1 (CAB UNDEREXPRESSED 1); antiporter/ triose-phosphate transmembrane transporter | chr5:12588950-12591408 FORWARDmoderately similar to ( 233) TPT_SOLTU Triose phosphate/phosphate translocator, chloroplast precursor (cTPT) (E29) - Solanum tuberosum (Potato)highly similar to ( 582) loc_os08g25624 12008.m26834 protein triose p…	12.4	11.2	26.25	16.6	22.85	22.65	23.15	37.25	23.85	18.1
GRMZM2G180720	'1.5.1'	'PS.carbon concentrating mechanism.C4'	'highly similar to ( 530) AT1G61800 | Symbols: GPT2 | GPT2; antiporter/ glucose-6-phosphate transmembrane transporter | chr1:22824527-22826459 FORWARDmoderately similar to ( 250) TPT_SPIOL Triose phosphate/phosphate translocator, chloroplast precursor (cTPT) (p36) (E29) - Spinacia oleracea (Spinach)highly similar to ( 663) loc_os08g08840 12008.m080099 protein glucose-6-phosphate/phosphate translo…	62.25	55.45	65.95	76.1	38	44.45	52.05	56.05	72.85	70.25
GRMZM2G306345	'1.5.1'	'PS.carbon concentrating mechanism.C4'	'moderately similar to ( 329) AT4G15530 | Symbols: PPDK | PPDK (pyruvate orthophosphate dikinase); kinase/ pyruvate, phosphate dikinase | chr4:8864828-8870748 REVERSEmoderately similar to ( 375) PPDK_MAIZE Pyruvate, phosphate dikinase, chloroplast precursor (EC 2.7.9.1) (Pyruvate, orthophosphate dikinase) - Zea mays (Maize)moderately similar to ( 358) loc_os05g33570 12005.m083718 protein pyruvate…	0.5	0.25	0.6	0.5	0.1	0.65	2.1	5.5	1.2	0.4
GRMZM2G309275	'1.5.1'	'PS.carbon concentrating mechanism.C4'	'very weakly similar to (85.9) AT2G19900 | Symbols: ATNADP-ME1 | ATNADP-ME1 (NADP-malic enzyme 1); malate dehydrogenase (oxaloacetate-decarboxylating) (NADP+)/ malic enzyme/ oxidoreductase, acting on NADH or NADPH, NAD or NADP as acceptor | chr2:8592106-8595403 REVERSEvery weakly similar to (90.1) MAOC_MAIZE NADP-dependent malic enzyme, chloroplast precursor (EC 1.1.1.40) (NADP-ME) - Zea mays (Ma…	0	0	0	0	0	0	0	0	0	0
GRMZM2G348512	'1.5.1'	'PS.carbon concentrating mechanism.C4'	'moderately similar to ( 260) AT5G14740 | Symbols: CA2, CA18, BETA CA2 | CA2 (CARBONIC ANHYDRASE 2); carbonate dehydratase/ zinc ion binding | chr5:4758257-4762315 FORWARDmoderately similar to ( 338) CAHC_HORVU Carbonic anhydrase, chloroplast precursor (EC 4.2.1.1) (Carbonate dehydratase) - Hordeum vulgare (Barley)moderately similar to ( 331) loc_os01g45274 12001.m150428 protein carbonic anhydras…	0.45	0.2	1.75	1.85	1.4	0.8	0.15	0.2	1.2	1.25
GRMZM2G404237	'1.5.1'	'PS.carbon concentrating mechanism.C4'	'highly similar to ( 858) AT5G11670 | Symbols: ATNADP-ME2 | ATNADP-ME2 (NADP-malic enzyme 2); malate dehydrogenase (oxaloacetate-decarboxylating) (NADP+)/ malic enzyme/ oxidoreductase, acting on NADH or NADPH, NAD or NADP as acceptor | chr5:3754456-3758040 FORWARDhighly similar to ( 888) MAOC_ORYSA NADP-dependent malic enzyme, chloroplast precursor (EC 1.1.1.40) (NADP-ME) - Oryza sativa (Rice)hig…	0	0	0	0	0	0	0	0	0	0
GRMZM2G406672	'1.5.1'	'PS.carbon concentrating mechanism.C4'	'highly similar to ( 884) AT2G13560 | Symbols: | malate oxidoreductase, putative | chr2:5650089-5655103 FORWARDhighly similar to ( 884) MAOM_SOLTU NAD-dependent malic enzyme 62 kDa isoform, mitochondrial precursor (EC 1.1.1.39) (NAD-ME) - Solanum tuberosum (Potato)nearly identical (1017) loc_os07g31380 12007.m07407 protein NAD-dependent malic enzyme 62 kDa isoform, mitochondrial precursor, putati…	85.7	86.9	93.5	81.15	86.6	91.15	89.6	100.15	74.2	100.15
GRMZM2G414528	'1.5.1'	'PS.carbon concentrating mechanism.C4'	'moderately similar to ( 309) AT4G33580 | Symbols: ATBCA5, BCA5 | carbonic anhydrase family protein / carbonate dehydratase family protein | chr4:16139406-16141363 FORWARDweakly similar to ( 199) CAHC_PEA Carbonic anhydrase, chloroplast precursor (EC 4.2.1.1) (Carbonate dehydratase) [Contains: Carbonic anhydrase, 27 kDa isoform; Carbonic anhydrase, 25 kDa isoform] - Pisum sativum (Garden pea)mode…	15.2	17.85	17.8	14.15	14.35	15.9	17.1	24.7	9.5	21.15
GRMZM2G431314	'1.5.1'	'PS.carbon concentrating mechanism.C4'	'highly similar to ( 529) AT1G61800 | Symbols: GPT2 | GPT2; antiporter/ glucose-6-phosphate transmembrane transporter | chr1:22824527-22826459 FORWARDmoderately similar to ( 249) TPT_PEA Triose phosphate/phosphate translocator, chloroplast precursor (cTPT) (p36) (E30) - Pisum sativum (Garden pea)highly similar to ( 658) loc_os08g08840 12008.m080099 protein glucose-6-phosphate/phosphate translocat…	55.95	64.7	66.65	48.2	47.25	39.8	40.25	37.55	55.8	52.9
GRMZM2G461332	'1.5.1'	'PS.carbon concentrating mechanism.C4'	'moderately similar to ( 322) AT5G11670 | Symbols: ATNADP-ME2 | ATNADP-ME2 (NADP-malic enzyme 2); malate dehydrogenase (oxaloacetate-decarboxylating) (NADP+)/ malic enzyme/ oxidoreductase, acting on NADH or NADPH, NAD or NADP as acceptor | chr5:3754456-3758040 FORWARDmoderately similar to ( 322) MAOX_PHAVU NADP-dependent malic enzyme (EC 1.1.1.40) (NADP-ME) - Phaseolus vulgaris (Kidney bean) (Fre…	0	0	0	0	0	0	0	0	0	0
GRMZM2G473001	'1.5.1'	'PS.carbon concentrating mechanism.C4'	'nearly identical (1636) AT1G53310 | Symbols: ATPPC1 | ATPPC1 (PHOSPHOENOLPYRUVATE CARBOXYLASE 1); catalytic/ phosphoenolpyruvate carboxylase | chr1:19884261-19888070 REVERSEnearly identical (1864) CAPP2_MAIZE Phosphoenolpyruvate carboxylase 2 (EC 4.1.1.31) (PEPCase 2) (PEPC 2) - Zea mays (Maize)nearly identical (1765) loc_os09g14670 12009.m04730 protein phosphoenolpyruvate carboxylase 2, putativ…	46.75	41.15	43	43.5	31.8	30.7	24.3	29.6	34	30.95	phosphoenolpyruvate carboxylase4
GRMZM5G886257	'1.5.1'	'PS.carbon concentrating mechanism.C4'	'highly similar to ( 869) AT5G11670 | Symbols: ATNADP-ME2 | ATNADP-ME2 (NADP-malic enzyme 2); malate dehydrogenase (oxaloacetate-decarboxylating) (NADP+)/ malic enzyme/ oxidoreductase, acting on NADH or NADPH, NAD or NADP as acceptor | chr5:3754456-3758040 FORWARDhighly similar to ( 902) MAOC_ORYSA NADP-dependent malic enzyme, chloroplast precursor (EC 1.1.1.40) (NADP-ME) - Oryza sativa (Rice)hig…	1.9	0.35	2.25	1.85	2.5	1.05	0.8	2.05	1.1	1.4
GRMZM2G019986	'10.1'	'cell wall.precursor synthesis'	'highly similar to ( 724) AT1G31070 | Symbols: | UDP-N-acetylglucosamine pyrophosphorylase-related | chr1:11084951-11088361 FORWARDhighly similar to ( 848) loc_os04g52370 12004.m35198 protein UDP-N-acetylglucosamine pyrophosphorylase, putative, expressed seq=cds; coord=10:142070803..142075281:-1; parent_gene=GRMZM2G019986'	12.25	7.35	12.8	12.95	15.6	15.2	15.7	17.75	16.4	15
GRMZM2G044629	'10.1'	'cell wall.precursor synthesis'	'highly similar to ( 728) AT1G31070 | Symbols: | UDP-N-acetylglucosamine pyrophosphorylase-related | chr1:11084951-11088361 FORWARDhighly similar to ( 842) loc_os04g52370 12004.m35198 protein UDP-N-acetylglucosamine pyrophosphorylase, putative, expressed seq=cds; coord=2:10472468..10476899:1; parent_gene=GRMZM2G044629'	22.4	12.3	21.95	21.95	12.45	14.7	14.35	19.8	20.5	18.1
GRMZM2G064841	'10.1'	'cell wall.precursor synthesis'	'highly similar to ( 512) AT1G74910 | Symbols: | ADP-glucose pyrophosphorylase family protein | chr1:28135770-28138456 REVERSEhighly similar to ( 603) loc_os03g11050 12003.m35086 protein mannose-1-phosphate guanyltransferase, putative, expressed seq=cds; coord=1:21196693..21221560:1; parent_gene=GRMZM2G064841'	8.5	5.4	22.8	14.8	30.7	31.1	29.35	27.15	33.1	44.85
GRMZM2G155729	'10.1'	'cell wall.precursor synthesis'	'highly similar to ( 775) AT1G31070 | Symbols: | UDP-N-acetylglucosamine pyrophosphorylase-related | chr1:11084951-11088361 FORWARDhighly similar to ( 879) loc_os08g10600 12008.m26617 protein UDP-N-acetylglucosamine pyrophosphorylase, putative, expressed seq=cds; coord=10:63785328..63789461:-1; parent_gene=GRMZM2G155729'	12.75	10.2	12.85	15.65	15.4	13.65	11.05	11.5	11.55	17.9
GRMZM2G166597	'10.1'	'cell wall.precursor synthesis'	'highly similar to ( 583) AT5G18070 | Symbols: DRT101 | DRT101 (DNA-DAMAGE-REPAIR/TOLERATION 101); intramolecular transferase, phosphotransferases / magnesium ion binding | chr5:5981117-5982787 FORWARDhighly similar to ( 770) AGM1_ORYSA Phosphoacetylglucosamine mutase (EC 5.4.2.3) (PAGM) (Acetylglucosamine phosphomutase) (N-acetylglucosamine-phosphate mutase) - Oryza sativa (Rice)highly similar t…	3.85	2.45	6.5	5.1	7.9	9.85	9.65	9.6	7	10
GRMZM2G178254	'10.1'	'cell wall.precursor synthesis'	'highly similar to ( 670) AT1G74910 | Symbols: | ADP-glucose pyrophosphorylase family protein | chr1:28135770-28138456 REVERSEhighly similar to ( 776) loc_os03g11050 12003.m35086 protein mannose-1-phosphate guanyltransferase, putative, expressed seq=cds; coord=9:147486941..147492124:1; parent_gene=GRMZM2G178254'	11.95	9.35	13.65	12.45	15.6	12.1	12.85	16	16.65	14.15
GRMZM2G515150	'10.1'	'cell wall.precursor synthesis'	'weakly similar to ( 132) AT5G18070 | Symbols: DRT101 | DRT101 (DNA-DAMAGE-REPAIR/TOLERATION 101); intramolecular transferase, phosphotransferases / magnesium ion binding | chr5:5981117-5982787 FORWARDweakly similar to ( 159) AGM1_ORYSA Phosphoacetylglucosamine mutase (EC 5.4.2.3) (PAGM) (Acetylglucosamine phosphomutase) (N-acetylglucosamine-phosphate mutase) - Oryza sativa (Rice)weakly similar t…	0	0	0	0	0	0	0	0	0	0
GRMZM2G119300	'10.1.1.1'	'cell wall.precursor synthesis.NDP sugar pyrophosphorylase.GDP mannose'	'highly similar to ( 652) AT2G39770 | Symbols: CYT1, VTC1, SOZ1, EMB101, GMP1 | CYT1 (CYTOKINESIS DEFECTIVE 1); mannose-1-phosphate guanylyltransferase/ nucleotidyltransferase | chr2:16589401-16590741 FORWARDhighly similar to ( 689) loc_os08g13930 12008.m26632 protein mannose-1-phosphate guanyltransferase, putative, expressed seq=cds; coord=3:179726904..179729560:-1; parent_gene=GRMZM2G119300'	74.1	103.85	59.8	82.15	91.95	98.75	101.75	59.1	83.9	96.5
GRMZM2G149265	'10.1.1.1'	'cell wall.precursor synthesis.NDP sugar pyrophosphorylase.GDP mannose'	'highly similar to ( 654) AT2G39770 | Symbols: CYT1, VTC1, SOZ1, EMB101, GMP1 | CYT1 (CYTOKINESIS DEFECTIVE 1); mannose-1-phosphate guanylyltransferase/ nucleotidyltransferase | chr2:16589401-16590741 FORWARDhighly similar to ( 692) loc_os08g13930 12008.m26632 protein mannose-1-phosphate guanyltransferase, putative, expressed seq=cds; coord=8:168277374..168280930:-1; parent_gene=GRMZM2G149265'	35.85	35.05	37	40.2	62.25	52.75	64.1	34.5	49.9	77.25
GRMZM2G160506	'10.1.1.1'	'cell wall.precursor synthesis.NDP sugar pyrophosphorylase.GDP mannose'	'highly similar to ( 640) AT2G39770 | Symbols: CYT1, VTC1, SOZ1, EMB101, GMP1 | CYT1 (CYTOKINESIS DEFECTIVE 1); mannose-1-phosphate guanylyltransferase/ nucleotidyltransferase | chr2:16589401-16590741 FORWARDhighly similar to ( 691) loc_os03g16150 12003.m07052 protein mannose-1-phosphate guanyltransferase, putative, expressed seq=cds; coord=1:39110590..39113895:-1; parent_gene=GRMZM2G160506'	19.65	13.7	40.15	17	16.3	10.15	14.55	18.15	13.65	31.5
GRMZM2G116586	'10.1.1.20'	'cell wall.precursor synthesis.NDP sugar pyrophosphorylase.multiple NDP-Sugars'	'highly similar to ( 908) AT5G52560 | Symbols: ATUSP | ATUSP (ARABIDOPSIS THALIANA UDP-SUGAR PYROPHOSPHORYLASE); UTP-monosaccharide-1-phosphate uridylyltransferase/ UTP:arabinose-1-phosphate uridylyltransferase/ UTP:galactose-1-phosphate uridylyltransferase/ UTP:glucose-1-phosphate uridylyltransferase/ UTP:xy | chr5:21331230-21334573 FORWARDnearly identical (1054) loc_os06g48760 12006.m091778 pro…	13.25	6.95	10.8	12.7	8.35	13.8	9.85	14.05	18.5	10.5
GRMZM2G161493	'10.1.1.20'	'cell wall.precursor synthesis.NDP sugar pyrophosphorylase.multiple NDP-Sugars'	'highly similar to ( 934) AT5G52560 | Symbols: ATUSP | ATUSP (ARABIDOPSIS THALIANA UDP-SUGAR PYROPHOSPHORYLASE); UTP-monosaccharide-1-phosphate uridylyltransferase/ UTP:arabinose-1-phosphate uridylyltransferase/ UTP:galactose-1-phosphate uridylyltransferase/ UTP:glucose-1-phosphate uridylyltransferase/ UTP:xy | chr5:21331230-21334573 FORWARDnearly identical (1090) loc_os06g48760 12006.m091778 pro…	8.6	9.25	10.55	8.55	8.95	9.9	8.5	6.15	10.3	9.9
GRMZM2G396565	'10.1.1.20'	'cell wall.precursor synthesis.NDP sugar pyrophosphorylase.multiple NDP-Sugars'	'moderately similar to ( 353) AT5G52560 | Symbols: ATUSP | ATUSP (ARABIDOPSIS THALIANA UDP-SUGAR PYROPHOSPHORYLASE); UTP-monosaccharide-1-phosphate uridylyltransferase/ UTP:arabinose-1-phosphate uridylyltransferase/ UTP:galactose-1-phosphate uridylyltransferase/ UTP:glucose-1-phosphate uridylyltransferase/ UTP:xy | chr5:21331230-21334573 FORWARDmoderately similar to ( 419) loc_os06g48760 12006.m0…	0	0	0	0	0	0	0	0	0	0
GRMZM2G031311	'10.1.10'	'cell wall.precursor synthesis.UDP-glucose 4,6-dehydratase'	'highly similar to ( 867) AT1G78570 | Symbols: RHM1, ROL1, ATRHM1 | RHM1 (RHAMNOSE BIOSYNTHESIS 1); UDP-L-rhamnose synthase/ UDP-glucose 4,6-dehydratase/ catalytic | chr1:29550110-29552207 FORWARDvery weakly similar to (96.3) ARAE3_ORYSA Probable UDP-arabinose 4-epimerase 3 (EC 5.1.3.5) (UDP-D-xylose 4-epimerase 3) (UDP-galactose 4-epimerase-like protein 3) (OsUEL-3) - Oryza sativa (Rice)highly s…	14.55	20.4	31.1	8.25	15.35	12.95	12.1	15.7	16.5	5.6
GRMZM2G044281	'10.1.10'	'cell wall.precursor synthesis.UDP-glucose 4,6-dehydratase'	'nearly identical (1146) AT1G78570 | Symbols: RHM1, ROL1, ATRHM1 | RHM1 (RHAMNOSE BIOSYNTHESIS 1); UDP-L-rhamnose synthase/ UDP-glucose 4,6-dehydratase/ catalytic | chr1:29550110-29552207 FORWARDvery weakly similar to ( 100) ARAE2_ORYSA Probable UDP-arabinose 4-epimerase 2 (EC 5.1.3.5) (UDP-D-xylose 4-epimerase 2) (UDP-galactose 4-epimerase-like protein 2) (OsUEL-2) - Oryza sativa (Rice)nearly id…	13.65	13.05	14.15	15.8	18.15	15.75	13.95	14.4	18.9	16.3
GRMZM2G072911	'10.1.10'	'cell wall.precursor synthesis.UDP-glucose 4,6-dehydratase'	'moderately similar to ( 488) AT1G63000 | Symbols: NRS/ER, UER1 | NRS/ER (NUCLEOTIDE-RHAMNOSE SYNTHASE/EPIMERASE-REDUCTASE); UDP-4-keto-6-deoxy-glucose-3,5-epimerase/ UDP-4-keto-rhamnose-4-keto-reductase/ dTDP-4-dehydrorhamnose 3,5-epimerase/ dTDP-4-dehydrorhamnose reductase | chr1:23342510-23343859 FORWARDhighly similar to ( 532) loc_os02g45540 12002.m09591 protein dTDP-4-dehydrorhamnose reducta…	13.5	9.15	21.6	14	20.1	23.2	19.7	22.3	15.85	19.05
GRMZM2G166767	'10.1.10'	'cell wall.precursor synthesis.UDP-glucose 4,6-dehydratase'	'nearly identical (1167) AT1G78570 | Symbols: RHM1, ROL1, ATRHM1 | RHM1 (RHAMNOSE BIOSYNTHESIS 1); UDP-L-rhamnose synthase/ UDP-glucose 4,6-dehydratase/ catalytic | chr1:29550110-29552207 FORWARDweakly similar to ( 101) ARAE1_ORYSA Probable UDP-arabinose 4-epimerase 1 (EC 5.1.3.5) (UDP-D-xylose 4-epimerase 1) (UDP-galactose 4-epimerase-like protein 1) (OsUEL-1) - Oryza sativa (Rice)nearly identic…	22.6	36.55	24.4	21.4	27.1	20.25	25.65	21.65	22.8	36
GRMZM2G345330	'10.1.10'	'cell wall.precursor synthesis.UDP-glucose 4,6-dehydratase'	'moderately similar to ( 220) AT1G78570 | Symbols: RHM1, ROL1, ATRHM1 | RHM1 (RHAMNOSE BIOSYNTHESIS 1); UDP-L-rhamnose synthase/ UDP-glucose 4,6-dehydratase/ catalytic | chr1:29550110-29552207 FORWARDmoderately similar to ( 252) loc_os03g17000 12003.m35163 protein RHM1, putative, expressed seq=cds; coord=1:41480282..41483601:-1; parent_gene=GRMZM2G345330'	12.45	11.45	12.5	14.55	17.3	14.75	12.95	13.9	17.95	14.85
GRMZM2G549568	'10.1.10'	'cell wall.precursor synthesis.UDP-glucose 4,6-dehydratase'	'highly similar to ( 582) AT1G53500 | Symbols: MUM4, RHM2, ATRHM2, ATMUM4 | MUM4 (MUCILAGE-MODIFIED 4); UDP-4-keto-6-deoxy-glucose-3,5-epimerase/ UDP-4-keto-rhamnose-4-keto-reductase/ UDP-L-rhamnose synthase/ UDP-glucose 4,6-dehydratase/ catalytic | chr1:19967157-19969239 REVERSEweakly similar to ( 101) ARAE2_ORYSA Probable UDP-arabinose 4-epimerase 2 (EC 5.1.3.5) (UDP-D-xylose 4-epimerase 2) (UD…	0	0.05	0.15	0	0	0	0	0	0.05	0
GRMZM5G878607	'10.1.10'	'cell wall.precursor synthesis.UDP-glucose 4,6-dehydratase'	'highly similar to ( 582) AT1G53500 | Symbols: MUM4, RHM2, ATRHM2, ATMUM4 | MUM4 (MUCILAGE-MODIFIED 4); UDP-4-keto-6-deoxy-glucose-3,5-epimerase/ UDP-4-keto-rhamnose-4-keto-reductase/ UDP-L-rhamnose synthase/ UDP-glucose 4,6-dehydratase/ catalytic | chr1:19967157-19969239 REVERSEweakly similar to ( 101) ARAE2_ORYSA Probable UDP-arabinose 4-epimerase 2 (EC 5.1.3.5) (UDP-D-xylose 4-epimerase 2) (UD…	0	0	0.05	0	0	0	0	0	0.05	0
GRMZM2G012143	'10.1.12.1'	'cell wall.precursor synthesis.KDO pathway.arabinose-5-phosphate isomerase'	'moderately similar to ( 465) AT3G54690 | Symbols: | sugar isomerase (SIS) domain-containing protein / CBS domain-containing protein | chr3:20246586-20247810 FORWARDhighly similar to ( 619) loc_os02g06360 12002.m05984 protein expressed protein seq=cds; coord=4:237033697..237037036:-1; parent_gene=GRMZM2G012143'	24.8	30.45	14.5	27.9	13.95	12.45	15.45	17.95	9.75	10.35
GRMZM2G119256	'10.1.12.4'	'cell wall.precursor synthesis.KDO pathway.CMP-KDO Synthetase'	'moderately similar to ( 376) AT1G53000 | Symbols: | cytidylyltransferase family | chr1:19745330-19747133 REVERSEmoderately similar to ( 426) loc_os05g48750 12005.m08946 protein 3-deoxy-manno-octulosonate cytidylyltransferase, putative, expressed seq=cds; coord=8:68934995..68937783:-1; parent_gene=GRMZM2G119256'	96.7	103.2	110.65	100.7	124.85	124.95	140.3	151.35	123.25	153.55
GRMZM2G038598	'10.1.2'	'cell wall.precursor synthesis.UGE'	'highly similar to ( 548) AT4G23920 | Symbols: UGE2 | UGE2 (UDP-D-glucose/UDP-D-galactose 4-epimerase 2); UDP-glucose 4-epimerase/ protein dimerization | chr4:12431416-12433666 FORWARDmoderately similar to ( 448) GALE1_PEA UDP-glucose 4-epimerase (EC 5.1.3.2) (Galactowaldenase) (UDP-galactose 4-epimerase) - Pisum sativum (Garden pea)highly similar to ( 611) loc_os05g51670 12005.m27995 protein UDP…	0.2	0.5	0.15	0.15	0	0	0	0	0.15	0.15
GRMZM2G052336	'10.1.2'	'cell wall.precursor synthesis.UGE'	'highly similar to ( 539) AT1G12780 | Symbols: UGE1 | UGE1 (UDP-D-glucose/UDP-D-galactose 4-epimerase 1); UDP-glucose 4-epimerase/ protein dimerization | chr1:4356124-4358120 REVERSEhighly similar to ( 548) GALE1_PEA UDP-glucose 4-epimerase (EC 5.1.3.2) (Galactowaldenase) (UDP-galactose 4-epimerase) - Pisum sativum (Garden pea)highly similar to ( 575) loc_os09g35800 12009.m06531 protein UDP-gluco…	2.1	4.35	2.1	0.75	0	0	0.1	0	0.1	0
GRMZM2G136439	'10.1.2'	'cell wall.precursor synthesis.UGE'	'weakly similar to ( 103) AT1G64440 | Symbols: RHD1, REB1, UGE4 | RHD1 (ROOT HAIR DEFECTIVE 1); UDP-glucose 4-epimerase/ protein dimerization | chr1:23937102-23939565 FORWARDweakly similar to ( 153) loc_os08g28730 12008.m06878 protein UDP-glucose 4-epimerase GEPI48, putative, expressed seq=cds; coord=1:220095821..220098832:1; parent_gene=GRMZM2G136439'	0	0	0	0.1	0.05	0.1	0.1	0.2	0.05	0.1
GRMZM2G138410	'10.1.2'	'cell wall.precursor synthesis.UGE'	'highly similar to ( 529) AT4G10960 | Symbols: UGE5 | UGE5 (UDP-D-glucose/UDP-D-galactose 4-epimerase 5); UDP-glucose 4-epimerase/ protein dimerization | chr4:6716083-6718472 REVERSEmoderately similar to ( 452) GALE1_PEA UDP-glucose 4-epimerase (EC 5.1.3.2) (Galactowaldenase) (UDP-galactose 4-epimerase) - Pisum sativum (Garden pea)highly similar to ( 624) loc_os09g15420 12009.m04803 protein UDP-g…	5.3	5.05	6.85	7.35	12.15	10.35	10.7	9.25	10.65	10.55
GRMZM2G469523	'10.1.2'	'cell wall.precursor synthesis.UGE'	'weakly similar to ( 185) AT4G10960 | Symbols: UGE5 | UGE5 (UDP-D-glucose/UDP-D-galactose 4-epimerase 5); UDP-glucose 4-epimerase/ protein dimerization | chr4:6716083-6718472 REVERSEweakly similar to ( 175) GALE1_PEA UDP-glucose 4-epimerase (EC 5.1.3.2) (Galactowaldenase) (UDP-galactose 4-epimerase) - Pisum sativum (Garden pea)moderately similar to ( 272) loc_os08g28730 12008.m06878 protein UDP-g…	195.45	99.15	206.75	177	184.2	197.8	242.5	277.35	203.35	245.9
GRMZM2G121066	'10.1.20'	'cell wall.precursor synthesis.phosphomannose isomerase'	'moderately similar to ( 449) AT3G02570 | Symbols: MEE31, PMI1 | MEE31 (MATERNAL EFFECT EMBRYO ARREST 31); mannose-6-phosphate isomerase | chr3:543463-545478 REVERSEhighly similar to ( 645) loc_os01g03710 12001.m42847 protein mannose-6-phosphate isomerase, putative, expressed seq=cds; coord=3:23781953..23788013:-1; parent_gene=GRMZM2G121066'	1.05	1	1.35	1.1	1.3	1.75	1.25	1.55	2.35	1.3
GRMZM2G438998	'10.1.20'	'cell wall.precursor synthesis.phosphomannose isomerase'	'very weakly similar to (84.7) AT3G02570 | Symbols: MEE31, PMI1 | MEE31 (MATERNAL EFFECT EMBRYO ARREST 31); mannose-6-phosphate isomerase | chr3:543463-545478 REVERSEweakly similar to ( 134) loc_os01g03710 12001.m42847 protein mannose-6-phosphate isomerase, putative, expressed seq=cds; coord=8:11249794..11250330:1; parent_gene=GRMZM2G438998'	0.05	0	0	0	0	0	0	0	0	0
GRMZM2G448466	'10.1.20'	'cell wall.precursor synthesis.phosphomannose isomerase'	'weakly similar to ( 130) AT5G61060 | Symbols: HDA05, HDA5, ATHDA5 | HDA05 (HISTONE DEACETYLASE 5); histone deacetylase | chr5:24567137-24570917 REVERSEweakly similar to ( 188) loc_os09g22090 12009.m05416 protein mannose-6-phosphate isomerase, putative, expressed seq=cds; coord=6:35749254..35750249:-1; parent_gene=GRMZM2G448466'	0.05	0.05	0	0.05	0	0	0	0	0	0
GRMZM2G456471	'10.1.20'	'cell wall.precursor synthesis.phosphomannose isomerase'	'moderately similar to ( 436) AT1G67070 | Symbols: DIN9, PMI2 | DIN9 (DARK INDUCIBLE 9); mannose-6-phosphate isomerase | chr1:25042324-25044412 FORWARDhighly similar to ( 608) loc_os11g38810 12011.m07729 protein mannose-6-phosphate isomerase, putative, expressed seq=cds; coord=4:6852215..6858004:-1; parent_gene=GRMZM2G456471'	15.1	10.6	12.8	11.8	8.05	6.7	7.2	9.25	9.85	6.55
GRMZM2G456917	'10.1.20'	'cell wall.precursor synthesis.phosphomannose isomerase'	'weakly similar to ( 115) AT3G02570 | Symbols: MEE31, PMI1 | MEE31 (MATERNAL EFFECT EMBRYO ARREST 31); mannose-6-phosphate isomerase | chr3:543463-545478 REVERSEweakly similar to ( 186) loc_os09g22090 12009.m05416 protein mannose-6-phosphate isomerase, putative, expressed seq=cds; coord=5:70089732..70091797:-1; parent_gene=GRMZM2G456917'	0	0	0	0	0	0	0	0	0	0
GRMZM2G165535	'10.1.21'	'cell wall.precursor synthesis.phosphomannomutase'	'moderately similar to ( 406) AT2G45790 | Symbols: ATPMM, PMM | PMM (PHOSPHOMANNOMUTASE); phosphomannomutase | chr2:18855876-18857753 FORWARDmoderately similar to ( 471) loc_os04g58580 12004.m101698 protein phosphomannomutase, putative, expressed seq=cds; coord=2:958698..961773:-1; parent_gene=GRMZM2G165535'	11	12.25	21.2	12.85	18.8	15.25	14.15	19.8	20.25	24.25
GRMZM2G063949	'10.1.3'	'cell wall.precursor synthesis.AXS'	'highly similar to ( 681) AT1G08200 | Symbols: AXS2 | AXS2 (UDP-D-APIOSE/UDP-D-XYLOSE SYNTHASE 2); UDP-glucuronate decarboxylase | chr1:2574259-2576609 REVERSEhighly similar to ( 765) loc_os01g73790 12001.m13406 protein bifunctional polymyxin resistance arnA protein, putative, expressed seq=cds; coord=3:132396184..132400373:-1; parent_gene=GRMZM2G063949'	101.25	87.8	93.95	90.6	92.65	112.65	94.15	112.05	99.5	102.8
GRMZM2G167872	'10.1.3'	'cell wall.precursor synthesis.AXS'	'highly similar to ( 670) AT1G08200 | Symbols: AXS2 | AXS2 (UDP-D-APIOSE/UDP-D-XYLOSE SYNTHASE 2); UDP-glucuronate decarboxylase | chr1:2574259-2576609 REVERSEhighly similar to ( 752) loc_os01g73790 12001.m13406 protein bifunctional polymyxin resistance arnA protein, putative, expressed seq=cds; coord=8:156865023..156868389:1; parent_gene=GRMZM2G167872'	167.8	172.6	136.95	122.95	95.5	86.9	79.25	119.25	86.3	95.15
GRMZM2G033930	'10.1.30.3'	'cell wall.precursor synthesis.sugar kinases.glucuronic acid kinase'	'moderately similar to ( 425) AT3G01640 | Symbols: | GHMP kinase family protein | chr3:239418-241198 FORWARDmoderately similar to ( 456) loc_os11g11060 12011.m28759 protein ATP binding protein, putative, expressed seq=cds; coord=1:111589370..111591480:1; parent_gene=GRMZM2G033930'	24.1	24.35	23.45	22.5	19.45	24.4	21.5	17.8	23.55	20.2
GRMZM2G058244	'10.1.4'	'cell wall.precursor synthesis.UGD'	'highly similar to ( 810) AT5G15490 | Symbols: | UDP-glucose 6-dehydrogenase, putative | chr5:5027872-5029314 REVERSEhighly similar to ( 811) UGDH_SOYBN UDP-glucose 6-dehydrogenase (EC 1.1.1.22) (UDP-Glc dehydrogenase) (UDP-GlcDH) (UDPGDH) - Glycine max (Soybean)highly similar to ( 863) loc_os03g40720 12003.m09146 protein UDP-glucose 6-dehydrogenase, putative, expressed seq=cds; coord=1:249422298…	0	0	0	0	0	0	0	0	0	0
GRMZM2G328500	'10.1.4'	'cell wall.precursor synthesis.UGD'	'highly similar to ( 885) AT3G29360 | Symbols: | UDP-glucose 6-dehydrogenase, putative | chr3:11267375-11268817 REVERSEhighly similar to ( 895) UGDH_SOYBN UDP-glucose 6-dehydrogenase (EC 1.1.1.22) (UDP-Glc dehydrogenase) (UDP-GlcDH) (UDPGDH) - Glycine max (Soybean)highly similar to ( 934) loc_os12g25690 12012.m06393 protein UDP-glucose 6-dehydrogenase, putative, expressed seq=cds; coord=1:2781302…	87.95	95.45	123.75	101.9	127.45	124	126.4	93.95	109.7	184.25
GRMZM5G862540	'10.1.4'	'cell wall.precursor synthesis.UGD'	'highly similar to ( 880) AT3G29360 | Symbols: | UDP-glucose 6-dehydrogenase, putative | chr3:11267375-11268817 REVERSEhighly similar to ( 893) UGDH_SOYBN UDP-glucose 6-dehydrogenase (EC 1.1.1.22) (UDP-Glc dehydrogenase) (UDP-GlcDH) (UDPGDH) - Glycine max (Soybean)highly similar to ( 936) loc_os12g25700 12012.m26903 protein UDP-glucose 6-dehydrogenase, putative, expressed seq=cds; coord=5:6688332…	14.95	10.65	26.25	20.5	31.1	25.6	27.1	21.3	19.9	79.45
GRMZM2G007195	'10.1.5'	'cell wall.precursor synthesis.UXS'	'moderately similar to ( 419) AT3G62830 | Symbols: UXS2, ATUXS2 | AUD1; UDP-glucuronate decarboxylase/ catalytic/ dTDP-glucose 4,6-dehydratase | chr3:23232539-23235353 FORWARDmoderately similar to ( 446) loc_os05g29990 12005.m07235 protein UDP-glucuronic acid decarboxylase 1, putative, expressed seq=cds; coord=6:138247534..138251846:1; parent_gene=GRMZM2G007195'	15	32.7	25.05	12.35	10	9.6	15.45	14.95	10.55	14.8
GRMZM2G007404	'10.1.5'	'cell wall.precursor synthesis.UXS'	'highly similar to ( 594) AT2G47650 | Symbols: UXS4 | UXS4 (UDP-XYLOSE SYNTHASE 4); UDP-glucuronate decarboxylase/ catalytic | chr2:19538751-19541364 REVERSEvery weakly similar to (94.0) GME1_ORYSA GDP-mannose 3,5-epimerase 1 (EC 5.1.3.18) (GDP-Man 3,5-epimerase 1) (OsGME-1) - Oryza sativa (Rice)highly similar to ( 691) loc_os05g29990 12005.m07235 protein UDP-glucuronic acid decarboxylase 1, puta…	18.05	16.2	20.2	13.75	16.15	17.65	18.8	14.95	12.45	17.5
GRMZM2G044027	'10.1.5'	'cell wall.precursor synthesis.UXS'	'highly similar to ( 594) AT2G28760 | Symbols: UXS6 | NAD-dependent epimerase/dehydratase family protein | chr2:12336469-12338642 REVERSEweakly similar to ( 103) GME2_ORYSA GDP-mannose 3,5-epimerase 2 (EC 5.1.3.18) (GDP-Man 3,5-epimerase 2) - Oryza sativa (Rice)highly similar to ( 657) loc_os03g16980 12003.m34836 protein UDP-glucuronic acid decarboxylase 1, putative, expressed seq=cds; coord=1:41…	7.65	6.4	14.55	9.7	16.6	18.9	16.65	14.45	12.3	17.5
GRMZM2G157772	'10.1.5'	'cell wall.precursor synthesis.UXS'	'weakly similar to ( 162) AT2G28760 | Symbols: UXS6 | NAD-dependent epimerase/dehydratase family protein | chr2:12336469-12338642 REVERSEweakly similar to ( 169) loc_os03g16980 12003.m34836 protein UDP-glucuronic acid decarboxylase 1, putative, expressed seq=cds; coord=1:200829505..200831322:-1; parent_gene=GRMZM2G157772'	0	0	0	0	0	0	0	0	0	0
GRMZM2G165357	'10.1.5'	'cell wall.precursor synthesis.UXS'	'highly similar to ( 594) AT2G28760 | Symbols: UXS6 | NAD-dependent epimerase/dehydratase family protein | chr2:12336469-12338642 REVERSEvery weakly similar to (99.8) GME2_ORYSA GDP-mannose 3,5-epimerase 2 (EC 5.1.3.18) (GDP-Man 3,5-epimerase 2) - Oryza sativa (Rice)highly similar to ( 656) loc_os03g16980 12003.m34836 protein UDP-glucuronic acid decarboxylase 1, putative, expressed seq=cds; coord…	29.95	28.9	51.4	43.95	56.2	54.45	59.45	46.1	49.05	101.55
GRMZM2G177373	'10.1.5'	'cell wall.precursor synthesis.UXS'	'moderately similar to ( 292) AT3G46440 | Symbols: UXS5 | UXS5; UDP-glucuronate decarboxylase/ catalytic | chr3:17089268-17091611 REVERSEweakly similar to ( 150) AVP_HORVU Pyrophosphate-energized vacuolar membrane proton pump (EC 3.6.1.1) (Pyrophosphate-energized inorganic pyrophosphatase) (H(+)-PPase) - Hordeum vulgare (Barley)moderately similar to ( 303) loc_os03g16980 12003.m34836 protein UDP-…	0	0	0	0	0	0	0	0	0	0
GRMZM2G300412	'10.1.5'	'cell wall.precursor synthesis.UXS'	'moderately similar to ( 311) AT3G46440 | Symbols: UXS5 | UXS5; UDP-glucuronate decarboxylase/ catalytic | chr3:17089268-17091611 REVERSEvery weakly similar to (89.0) AVP_PHAAU Pyrophosphate-energized vacuolar membrane proton pump (EC 3.6.1.1) (Pyrophosphate-energized inorganic pyrophosphatase) (H(+)-PPase) (Vacuolar H(+)-pyrophosphatase) - Phaseolus aureus (Mung bean) (Vigna radiata)moderately s…	0	0	0	0	0	0	0	0	0	0
GRMZM2G347717	'10.1.5'	'cell wall.precursor synthesis.UXS'	'moderately similar to ( 408) AT3G62830 | Symbols: UXS2, ATUXS2 | AUD1; UDP-glucuronate decarboxylase/ catalytic/ dTDP-glucose 4,6-dehydratase | chr3:23232539-23235353 FORWARDmoderately similar to ( 465) loc_os03g17230 12003.m07153 protein UDP-glucuronic acid decarboxylase 1, putative, expressed seq=cds; coord=9:138880653..138883538:1; parent_gene=GRMZM2G347717'	16.8	21.35	17.7	14.7	14.35	10.55	9.75	13.25	15.65	10.95
GRMZM2G359234	'10.1.5'	'cell wall.precursor synthesis.UXS'	'highly similar to ( 581) AT3G53520 | Symbols: UXS1, ATUXS1 | UXS1 (UDP-GLUCURONIC ACID DECARBOXYLASE 1); UDP-glucuronate decarboxylase/ catalytic | chr3:19841635-19843520 FORWARDweakly similar to ( 103) GME2_ORYSA GDP-mannose 3,5-epimerase 2 (EC 5.1.3.18) (GDP-Man 3,5-epimerase 2) - Oryza sativa (Rice)highly similar to ( 699) loc_os01g62020 12001.m150769 protein UDP-glucuronic acid decarboxylase…	10.25	17.05	13.1	9.55	11.8	9.55	11.25	10	12	19.25
GRMZM2G370048	'10.1.5'	'cell wall.precursor synthesis.UXS'	'highly similar to ( 559) AT3G53520 | Symbols: UXS1, ATUXS1 | UXS1 (UDP-GLUCURONIC ACID DECARBOXYLASE 1); UDP-glucuronate decarboxylase/ catalytic | chr3:19841635-19843520 FORWARDvery weakly similar to (91.7) GME2_ORYSA GDP-mannose 3,5-epimerase 2 (EC 5.1.3.18) (GDP-Man 3,5-epimerase 2) - Oryza sativa (Rice)highly similar to ( 677) loc_os01g62020 12001.m150769 protein UDP-glucuronic acid decarbox…	9.5	10	8.9	9.6	6.1	5.4	5.45	5.05	7.75	2.8
GRMZM2G381473	'10.1.5'	'cell wall.precursor synthesis.UXS'	'highly similar to ( 565) AT3G62830 | Symbols: UXS2, ATUXS2 | AUD1; UDP-glucuronate decarboxylase/ catalytic/ dTDP-glucose 4,6-dehydratase | chr3:23232539-23235353 FORWARDvery weakly similar to (93.2) GME1_ORYSA GDP-mannose 3,5-epimerase 1 (EC 5.1.3.18) (GDP-Man 3,5-epimerase 1) (OsGME-1) - Oryza sativa (Rice)highly similar to ( 664) loc_os01g21320 12001.m42987 protein UDP-glucuronic acid decarbo…	59	76.1	114.05	32.9	69.45	55.15	62.55	55.35	55.3	22.65
GRMZM2G382038	'10.1.5'	'cell wall.precursor synthesis.UXS'	'moderately similar to ( 238) AT3G46440 | Symbols: UXS5 | UXS5; UDP-glucuronate decarboxylase/ catalytic | chr3:17089268-17091611 REVERSEweakly similar to ( 150) AVP_HORVU Pyrophosphate-energized vacuolar membrane proton pump (EC 3.6.1.1) (Pyrophosphate-energized inorganic pyrophosphatase) (H(+)-PPase) - Hordeum vulgare (Barley)moderately similar to ( 245) loc_os03g16980 12003.m34836 protein UDP-…	0.05	0.05	0	0	0	0	0	0	0	0
AC206185.3_FG002	'10.1.6'	'cell wall.precursor synthesis.GAE'	'weakly similar to ( 189) AT4G00110 | Symbols: GAE3 | GAE3 (UDP-D-GLUCURONATE 4-EPIMERASE 3); UDP-glucuronate 4-epimerase/ catalytic | chr4:38702-39994 REVERSEmoderately similar to ( 216) loc_os02g54890 12002.m10517 protein expressed protein seq=cds; coord=6:116345195..116346376:-1; parent_gene=AC206185.3_FG002'	0	0	0	0	0	0	0	0	0	0
AC212361.3_FG010	'10.1.6'	'cell wall.precursor synthesis.GAE'	'weakly similar to ( 189) AT4G00110 | Symbols: GAE3 | GAE3 (UDP-D-GLUCURONATE 4-EPIMERASE 3); UDP-glucuronate 4-epimerase/ catalytic | chr4:38702-39994 REVERSEmoderately similar to ( 216) loc_os02g54890 12002.m10517 protein expressed protein seq=cds; coord=6:144435659..144436639:-1; parent_gene=AC212361.3_FG010'	0	0	0	0	0	0	0	0	0	0
AC212667.3_FG005	'10.1.6'	'cell wall.precursor synthesis.GAE'	'weakly similar to ( 186) AT4G00110 | Symbols: GAE3 | GAE3 (UDP-D-GLUCURONATE 4-EPIMERASE 3); UDP-glucuronate 4-epimerase/ catalytic | chr4:38702-39994 REVERSEmoderately similar to ( 213) loc_os02g54890 12002.m10517 protein expressed protein seq=cds; coord=5:201496856..201497977:-1; parent_gene=AC212667.3_FG005'	0	0	0	0	0	0	0	0	0	0
GRMZM2G000071	'10.1.6'	'cell wall.precursor synthesis.GAE'	'weakly similar to ( 119) AT4G00110 | Symbols: GAE3 | GAE3 (UDP-D-GLUCURONATE 4-EPIMERASE 3); UDP-glucuronate 4-epimerase/ catalytic | chr4:38702-39994 REVERSEweakly similar to ( 192) loc_os04g34140 12004.m08508 protein photoperiod responsive protein, putative, expressed seq=cds; coord=5:140893326..140895248:1; parent_gene=GRMZM2G000071'	0	0	0	0	0	0	0	0	0	0
GRMZM2G017678	'10.1.6'	'cell wall.precursor synthesis.GAE'	'moderately similar to ( 464) AT1G02000 | Symbols: GAE2 | GAE2 (UDP-D-GLUCURONATE 4-EPIMERASE 2); UDP-glucuronate 4-epimerase/ catalytic | chr1:346052-347356 FORWARDhighly similar to ( 582) loc_os03g14540 12003.m06894 protein expressed protein seq=cds; coord=9:142397242..142399285:1; parent_gene=GRMZM2G017678'	34.7	44.1	35.3	37	41.25	39.85	46.4	38.55	28	55.7
GRMZM2G042179	'10.1.6'	'cell wall.precursor synthesis.GAE'	'highly similar to ( 689) AT4G30440 | Symbols: GAE1 | GAE1 (UDP-D-GLUCURONATE 4-EPIMERASE 1); UDP-glucuronate 4-epimerase/ catalytic | chr4:14881976-14883265 REVERSEvery weakly similar to (85.5) GALE1_PEA UDP-glucose 4-epimerase (EC 5.1.3.2) (Galactowaldenase) (UDP-galactose 4-epimerase) - Pisum sativum (Garden pea)highly similar to ( 823) loc_os02g54890 12002.m10517 protein expressed protein seq…	20.9	13.75	17.25	22.45	16.95	18.25	23.3	26.95	15.8	13.75
GRMZM2G052357	'10.1.6'	'cell wall.precursor synthesis.GAE'	'moderately similar to ( 468) AT3G23820 | Symbols: GAE6 | GAE6 (UDP-D-GLUCURONATE 4-EPIMERASE 6); UDP-glucuronate 4-epimerase/ catalytic | chr3:8603645-8605027 FORWARDvery weakly similar to (87.0) GALE1_PEA UDP-glucose 4-epimerase (EC 5.1.3.2) (Galactowaldenase) (UDP-galactose 4-epimerase) - Pisum sativum (Garden pea)highly similar to ( 618) loc_os08g41440 12008.m08122 protein NAD-dependent epime…	5.6	4.3	11.1	8.05	5.3	6.5	8.35	10.95	4.4	14.3
GRMZM2G110558	'10.1.6'	'cell wall.precursor synthesis.GAE'	'highly similar to ( 681) AT4G30440 | Symbols: GAE1 | GAE1 (UDP-D-GLUCURONATE 4-EPIMERASE 1); UDP-glucuronate 4-epimerase/ catalytic | chr4:14881976-14883265 REVERSEvery weakly similar to (80.9) GALE1_PEA UDP-glucose 4-epimerase (EC 5.1.3.2) (Galactowaldenase) (UDP-galactose 4-epimerase) - Pisum sativum (Garden pea)highly similar to ( 789) loc_os02g54890 12002.m10517 protein expressed protein seq…	13.1	13.75	20.4	18.55	14.3	15.4	22.9	31.65	12.2	37.4
GRMZM2G161233	'10.1.6'	'cell wall.precursor synthesis.GAE'	'moderately similar to ( 483) AT3G23820 | Symbols: GAE6 | GAE6 (UDP-D-GLUCURONATE 4-EPIMERASE 6); UDP-glucuronate 4-epimerase/ catalytic | chr3:8603645-8605027 FORWARDhighly similar to ( 659) loc_os08g41440 12008.m08122 protein NAD-dependent epimerase/dehydratase family protein, putative, expressed seq=cds; coord=1:192730986..192732596:-1; parent_gene=GRMZM2G161233'	0.2	0.05	0.35	0.2	0.2	0	0.1	0	0.3	0.15
GRMZM2G163610	'10.1.6'	'cell wall.precursor synthesis.GAE'	'moderately similar to ( 203) AT4G30440 | Symbols: GAE1 | GAE1 (UDP-D-GLUCURONATE 4-EPIMERASE 1); UDP-glucuronate 4-epimerase/ catalytic | chr4:14881976-14883265 REVERSEmoderately similar to ( 231) loc_os02g54890 12002.m10517 protein expressed protein seq=cds; coord=8:109270426..109271663:-1; parent_gene=GRMZM2G163610'	0	0	0	0	0	0	0	0	0.05	0
GRMZM2G163617	'10.1.6'	'cell wall.precursor synthesis.GAE'	'moderately similar to ( 218) AT4G30440 | Symbols: GAE1 | GAE1 (UDP-D-GLUCURONATE 4-EPIMERASE 1); UDP-glucuronate 4-epimerase/ catalytic | chr4:14881976-14883265 REVERSEmoderately similar to ( 247) loc_os02g54890 12002.m10517 protein expressed protein seq=cds; coord=8:109273542..109274234:1; parent_gene=GRMZM2G163617'	0	0	0	0	0	0	0	0	0	0
GRMZM2G168274	'10.1.6'	'cell wall.precursor synthesis.GAE'	'highly similar to ( 534) AT4G30440 | Symbols: GAE1 | GAE1 (UDP-D-GLUCURONATE 4-EPIMERASE 1); UDP-glucuronate 4-epimerase/ catalytic | chr4:14881976-14883265 REVERSEvery weakly similar to (81.3) GALE1_PEA UDP-glucose 4-epimerase (EC 5.1.3.2) (Galactowaldenase) (UDP-galactose 4-epimerase) - Pisum sativum (Garden pea)highly similar to ( 583) loc_os02g54890 12002.m10517 protein expressed protein seq…	0	0	0	0	0	0	0	0	0	0
GRMZM2G170336	'10.1.6'	'cell wall.precursor synthesis.GAE'	'moderately similar to ( 431) AT1G02000 | Symbols: GAE2 | GAE2 (UDP-D-GLUCURONATE 4-EPIMERASE 2); UDP-glucuronate 4-epimerase/ catalytic | chr1:346052-347356 FORWARDweakly similar to ( 186) RS20_ORYSA 40S ribosomal protein S20 - Oryza sativa (Rice)highly similar to ( 530) loc_os03g14540 12003.m06894 protein expressed protein seq=cds; coord=1:34312025..34322470:1; parent_gene=GRMZM2G170336'	160.05	153.25	162.85	195.5	233.75	234.1	276.45	184.7	183.8	221.7
GRMZM2G429118	'10.1.6'	'cell wall.precursor synthesis.GAE'	'highly similar to ( 513) AT3G23820 | Symbols: GAE6 | GAE6 (UDP-D-GLUCURONATE 4-EPIMERASE 6); UDP-glucuronate 4-epimerase/ catalytic | chr3:8603645-8605027 FORWARDvery weakly similar to (95.9) GALE1_PEA UDP-glucose 4-epimerase (EC 5.1.3.2) (Galactowaldenase) (UDP-galactose 4-epimerase) - Pisum sativum (Garden pea)highly similar to ( 684) loc_os09g32670 12009.m06354 protein protein capI, putative,…	3.65	1.3	3.25	5.3	1.1	0.7	1.75	3.15	0.7	1.45
GRMZM2G455306	'10.1.6'	'cell wall.precursor synthesis.GAE'	'highly similar to ( 627) AT4G30440 | Symbols: GAE1 | GAE1 (UDP-D-GLUCURONATE 4-EPIMERASE 1); UDP-glucuronate 4-epimerase/ catalytic | chr4:14881976-14883265 REVERSEvery weakly similar to (81.6) GALE1_PEA UDP-glucose 4-epimerase (EC 5.1.3.2) (Galactowaldenase) (UDP-galactose 4-epimerase) - Pisum sativum (Garden pea)highly similar to ( 692) loc_os02g54890 12002.m10517 protein expressed protein seq…	0	0	0	0	0	0	0	0	0	0
GRMZM5G802231	'10.1.6'	'cell wall.precursor synthesis.GAE'	'very weakly similar to (86.7) loc_os02g54890 12002.m10517 protein expressed protein seq=cds; coord=5:14106555..14107181:1; parent_gene=GRMZM5G802231'	0	0	0	0	0	0	0	0	0	0
GRMZM2G074850	'10.1.7'	'cell wall.precursor synthesis.GMD'	'weakly similar to ( 155) AT5G66280 | Symbols: GMD1 | GMD1 (GDP-D-MANNOSE 4,6-DEHYDRATASE 1); GDP-mannose 4,6-dehydratase/ binding / catalytic/ coenzyme binding | chr5:26476434-26477519 FORWARDweakly similar to ( 194) loc_os06g04620 12006.m05192 protein GDP-mannose 4,6 dehydratase 2, putative, expressed seq=cds; coord=6:68812951..68814874:1; parent_gene=GRMZM2G074850'	53.7	34.55	61.05	61.35	54.55	59.35	72.4	70.9	60.65	86.6
GRMZM2G115124	'10.1.7'	'cell wall.precursor synthesis.GMD'	'highly similar to ( 550) AT3G51160 | Symbols: MUR1, MUR_1, GMD2 | MUR1 (MURUS 1); GDP-mannose 4,6-dehydratase | chr3:19007232-19008353 REVERSEhighly similar to ( 639) loc_os06g04620 12006.m05192 protein GDP-mannose 4,6 dehydratase 2, putative, expressed seq=cds; coord=9:21726160..21727733:1; parent_gene=GRMZM2G115124'	0	0.05	0.1	0	0.1	0	0	0.05	0.15	0.15
AC194325.3_FG006	'10.1.8'	'cell wall.precursor synthesis.GER'	'very weakly similar to (97.8) AT1G73250 | Symbols: ATFX, GER1 | GER1 (GDP-4-KETO-6-DEOXYMANNOSE-3,5-EPIMERASE-4-REDUCTASE 1); GDP-L-fucose synthase | chr1:27545213-27546360 REVERSEweakly similar to ( 123) FCL1_ORYSA Probable GDP-L-fucose synthase 1 (EC 1.1.1.271) (GDP-4-keto-6-deoxy-D-mannose-3, 5-epimerase-4-reductase 1) - Oryza sativa (Rice)weakly similar to ( 123) loc_os06g44270 12006.m08955 …	0	0	0	0	0	0	0	0	0	0
GRMZM2G029856	'10.1.8'	'cell wall.precursor synthesis.GER'	'highly similar to ( 516) AT1G17890 | Symbols: GER2 | GER2; binding / catalytic/ coenzyme binding | chr1:6154478-6155596 REVERSEhighly similar to ( 612) FCL1_ORYSA Probable GDP-L-fucose synthase 1 (EC 1.1.1.271) (GDP-4-keto-6-deoxy-D-mannose-3, 5-epimerase-4-reductase 1) - Oryza sativa (Rice)highly similar to ( 612) loc_os06g44270 12006.m08955 protein GDP-L-fucose synthase 1, putative, expressed …	40.95	43.5	35.3	33.7	21.4	20.35	23.25	21.95	24.7	23.2
GRMZM2G000632	'10.1.9'	'cell wall.precursor synthesis.MUR4'	'highly similar to ( 640) AT1G30620 | Symbols: HSR8, MUR4, UXE1 | MUR4 (MURUS 4); UDP-arabinose 4-epimerase/ catalytic | chr1:10855496-10857970 FORWARDhighly similar to ( 750) ARAE3_ORYSA Probable UDP-arabinose 4-epimerase 3 (EC 5.1.3.5) (UDP-D-xylose 4-epimerase 3) (UDP-galactose 4-epimerase-like protein 3) (OsUEL-3) - Oryza sativa (Rice)highly similar to ( 750) loc_os08g03570 12008.m04501 prote…	13.8	14.75	16.1	13	13.45	13.15	10.85	13.35	14.2	16.05
GRMZM2G040397	'10.1.9'	'cell wall.precursor synthesis.MUR4'	'highly similar to ( 651) AT1G30620 | Symbols: HSR8, MUR4, UXE1 | MUR4 (MURUS 4); UDP-arabinose 4-epimerase/ catalytic | chr1:10855496-10857970 FORWARDhighly similar to ( 707) ARAE2_ORYSA Probable UDP-arabinose 4-epimerase 2 (EC 5.1.3.5) (UDP-D-xylose 4-epimerase 2) (UDP-galactose 4-epimerase-like protein 2) (OsUEL-2) - Oryza sativa (Rice)highly similar to ( 707) loc_os04g52730 12004.m10166 prote…	4.1	5.55	6.75	4.5	5.6	3.7	3.95	4.65	3.6	5.95
GRMZM2G145460	'10.1.9'	'cell wall.precursor synthesis.MUR4'	'highly similar to ( 652) AT4G20460 | Symbols: | NAD-dependent epimerase/dehydratase family protein | chr4:11029767-11031765 REVERSEhighly similar to ( 706) ARAE2_ORYSA Probable UDP-arabinose 4-epimerase 2 (EC 5.1.3.5) (UDP-D-xylose 4-epimerase 2) (UDP-galactose 4-epimerase-like protein 2) (OsUEL-2) - Oryza sativa (Rice)highly similar to ( 706) loc_os04g52730 12004.m10166 protein UDP-arabinose 4-…	21.35	24.65	22.2	18.9	17.15	16.45	19.95	24.2	24.4	30.4
GRMZM2G325296	'10.1.9'	'cell wall.precursor synthesis.MUR4'	'weakly similar to ( 196) AT1G30620 | Symbols: HSR8, MUR4, UXE1 | MUR4 (MURUS 4); UDP-arabinose 4-epimerase/ catalytic | chr1:10855496-10857970 FORWARDmoderately similar to ( 222) ARAE1_ORYSA Probable UDP-arabinose 4-epimerase 1 (EC 5.1.3.5) (UDP-D-xylose 4-epimerase 1) (UDP-galactose 4-epimerase-like protein 1) (OsUEL-1) - Oryza sativa (Rice)moderately similar to ( 222) loc_os07g04690 12007.m079…	0	0	0	0	0	0	0	0.05	0.05	0
GRMZM5G830983	'10.1.9'	'cell wall.precursor synthesis.MUR4'	'moderately similar to ( 326) AT1G30620 | Symbols: HSR8, MUR4, UXE1 | MUR4 (MURUS 4); UDP-arabinose 4-epimerase/ catalytic | chr1:10855496-10857970 FORWARDmoderately similar to ( 342) ARAE3_ORYSA Probable UDP-arabinose 4-epimerase 3 (EC 5.1.3.5) (UDP-D-xylose 4-epimerase 3) (UDP-galactose 4-epimerase-like protein 3) (OsUEL-3) - Oryza sativa (Rice)moderately similar to ( 342) loc_os08g03570 12008.…	8.7	7.8	11	8	7.9	7.2	6.6	14.6	7.9	7.85
GRMZM5G877773	'10.1.9'	'cell wall.precursor synthesis.MUR4'	'weakly similar to ( 140) AT1G30620 | Symbols: HSR8, MUR4, UXE1 | MUR4 (MURUS 4); UDP-arabinose 4-epimerase/ catalytic | chr1:10855496-10857970 FORWARDweakly similar to ( 156) ARAE1_ORYSA Probable UDP-arabinose 4-epimerase 1 (EC 5.1.3.5) (UDP-D-xylose 4-epimerase 1) (UDP-galactose 4-epimerase-like protein 1) (OsUEL-1) - Oryza sativa (Rice)weakly similar to ( 156) loc_os07g04690 12007.m079576 prot…	0	0	0	0	0	0	0	0	0	0
GRMZM5G888791	'10.1.9'	'cell wall.precursor synthesis.MUR4'	'weakly similar to ( 155) AT5G44480 | Symbols: DUR | DUR (DEFECTIVE UGE IN ROOT); UDP-glucose 4-epimerase/ binding / catalytic/ coenzyme binding | chr5:17921515-17923643 FORWARDweakly similar to ( 177) ARAE3_ORYSA Probable UDP-arabinose 4-epimerase 3 (EC 5.1.3.5) (UDP-D-xylose 4-epimerase 3) (UDP-galactose 4-epimerase-like protein 3) (OsUEL-3) - Oryza sativa (Rice)weakly similar to ( 177) loc_os0…	0	0	0	0	0	0	0	0	0	0
AC183932.3_FG007	'10.2'	'cell wall.cellulose synthesis'	'highly similar to ( 720) AT4G07960 | Symbols: ATCSLC12, CSLC12 | ATCSLC12 (CELLULOSE-SYNTHASE LIKE C12); cellulose synthase/ transferase, transferring glycosyl groups | chr4:4802628-4805114 REVERSEhighly similar to ( 783) loc_os07g03260 12007.m04797 protein CSLC10 - cellulose synthase-like family C seq=cds; coord=5:5576047..5578811:1; parent_gene=AC183932.3_FG007'	0.2	0.3	0.2	0.35	0.25	0.1	0.1	0.5	0.2	0.35
AC199765.4_FG008	'10.2'	'cell wall.cellulose synthesis'	'highly similar to ( 562) AT5G49720 | Symbols: ATGH9A1, DEC, KOR, RSW2, IRX2, KOR1 | ATGH9A1 (ARABIDOPSIS THALIANA GLYCOSYL HYDROLASE 9A1); cellulase/ hydrolase, hydrolyzing O-glycosyl compounds | chr5:20197765-20200168 REVERSEhighly similar to ( 841) GUN12_ORYSA Endoglucanase 12 (EC 3.2.1.4) (Endo-1,4-beta glucanase 12) (OsGLU3) - Oryza sativa (Rice)highly similar to ( 841) loc_os04g41970 12004.…	0	0.05	0.75	0.1	0.3	0.15	0.1	0.7	0.1	0.4
GRMZM2G003379	'10.2'	'cell wall.cellulose synthesis'	'highly similar to ( 850) AT5G49720 | Symbols: ATGH9A1, DEC, KOR, RSW2, IRX2, KOR1 | ATGH9A1 (ARABIDOPSIS THALIANA GLYCOSYL HYDROLASE 9A1); cellulase/ hydrolase, hydrolyzing O-glycosyl compounds | chr5:20197765-20200168 REVERSEnearly identical (1051) GUN9_ORYSA Endoglucanase 9 (EC 3.2.1.4) (Endo-1,4-beta glucanase 9) (OsGLU1) - Oryza sativa (Rice)nearly identical (1051) loc_os03g21210 12003.m0752…	31.45	28.2	27.4	31	35	50.45	45	41.55	32.2	57.55
GRMZM2G010142	'10.2'	'cell wall.cellulose synthesis'	'moderately similar to ( 330) AT5G22740 | Symbols: ATCSLA02, CSLA02, ATCSLA2 | ATCSLA02; mannan synthase/ transferase, transferring glycosyl groups | chr5:7555379-7559866 REVERSEhighly similar to ( 534) loc_os07g43710 12007.m08596 protein CSLA7 - cellulose synthase-like family A; mannan synthase, expressed seq=cds; coord=7:167710884..167716076:1; parent_gene=GRMZM2G010142'	27.35	27.55	23	28.75	23.7	20.8	23.4	23.2	29.65	28.5
GRMZM2G020742	'10.2'	'cell wall.cellulose synthesis'	'moderately similar to ( 225) AT5G03760 | Symbols: ATCSLA09, CSLA09, ATCSLA9, CSLA9, RAT4 | ATCSLA09; mannan synthase/ transferase, transferring glycosyl groups | chr5:985910-990087 REVERSEmoderately similar to ( 225) loc_os06g42020 12006.m08734 protein CSLA9 - cellulose synthase-like family A, expressed seq=cds; coord=6:113273400..113280491:1; parent_gene=GRMZM2G020742'	2.3	1.4	3.2	3.65	1.5	1.8	4	3.25	2.45	5.75
GRMZM2G027794	'10.2'	'cell wall.cellulose synthesis'	'highly similar to ( 738) AT4G07960 | Symbols: ATCSLC12, CSLC12 | ATCSLC12 (CELLULOSE-SYNTHASE LIKE C12); cellulose synthase/ transferase, transferring glycosyl groups | chr4:4802628-4805114 REVERSEhighly similar to ( 914) loc_os01g56130 12001.m11769 protein CSLC1 - cellulose synthase-like family C, expressed seq=cds; coord=8:172971628..172976134:1; parent_gene=GRMZM2G027794'	43.9	32.8	27.4	45.65	33.05	23.15	27.2	18.95	30	25.7
GRMZM2G028286	'10.2'	'cell wall.cellulose synthesis'	'highly similar to ( 787) AT4G07960 | Symbols: ATCSLC12, CSLC12 | ATCSLC12 (CELLULOSE-SYNTHASE LIKE C12); cellulose synthase/ transferase, transferring glycosyl groups | chr4:4802628-4805114 REVERSEhighly similar to ( 862) loc_os07g03260 12007.m04797 protein CSLC10 - cellulose synthase-like family C seq=cds; coord=1:281644459..281648331:-1; parent_gene=GRMZM2G028286'	39.4	36.4	34.05	42.95	31.55	36.3	30.8	26.95	30.35	36.4
GRMZM2G056019	'10.2'	'cell wall.cellulose synthesis'	'weakly similar to ( 172) AT5G03760 | Symbols: ATCSLA09, CSLA09, ATCSLA9, CSLA9, RAT4 | ATCSLA09; mannan synthase/ transferase, transferring glycosyl groups | chr5:985910-990087 REVERSEweakly similar to ( 177) loc_os02g09930 12002.m33592 protein CSLA1 - cellulose synthase-like family A; mannan synthase, expressed seq=cds; coord=2:164182574..164183236:-1; parent_gene=GRMZM2G056019'	0	0	0	0	0	0	0	0	0	0
GRMZM2G066162	'10.2'	'cell wall.cellulose synthesis'	'highly similar to ( 627) AT1G65610 | Symbols: ATGH9A2, KOR2 | KOR2; catalytic/ hydrolase, hydrolyzing O-glycosyl compounds | chr1:24391823-24395261 REVERSEhighly similar to ( 879) GUN12_ORYSA Endoglucanase 12 (EC 3.2.1.4) (Endo-1,4-beta glucanase 12) (OsGLU3) - Oryza sativa (Rice)highly similar to ( 868) loc_os04g41970 12004.m09171 protein glycoside transferase, six-hairpin, subgroup, putative, …	0.05	0.05	0.05	0	0	0	0	0.05	0.05	0.05
GRMZM2G074792	'10.2'	'cell wall.cellulose synthesis'	'highly similar to ( 739) AT4G07960 | Symbols: ATCSLC12, CSLC12 | ATCSLC12 (CELLULOSE-SYNTHASE LIKE C12); cellulose synthase/ transferase, transferring glycosyl groups | chr4:4802628-4805114 REVERSEhighly similar to ( 854) loc_os05g43530 12005.m08480 protein CSLC7 - cellulose synthase-like family C, expressed seq=cds; coord=6:158222380..158226348:1; parent_gene=GRMZM2G074792'	6.6	5.5	8.6	5.4	2.55	2.1	4.45	5	2.75	9.3
GRMZM2G093999	'10.2'	'cell wall.cellulose synthesis'	'weakly similar to ( 105) AT5G22740 | Symbols: ATCSLA02, CSLA02, ATCSLA2 | ATCSLA02; mannan synthase/ transferase, transferring glycosyl groups | chr5:7555379-7559866 REVERSEweakly similar to ( 152) loc_os08g33740 12008.m07364 protein CSLA11 - cellulose synthase-like family A, expressed seq=cds; coord=4:83323033..83326629:-1; parent_gene=GRMZM2G093999'	0.05	0.05	0	0	0	0.05	0.05	0.1	0.05	0.05
GRMZM2G099088	'10.2'	'cell wall.cellulose synthesis'	'highly similar to ( 546) AT5G03760 | Symbols: ATCSLA09, CSLA09, ATCSLA9, CSLA9, RAT4 | ATCSLA09; mannan synthase/ transferase, transferring glycosyl groups | chr5:985910-990087 REVERSEhighly similar to ( 729) loc_os08g33740 12008.m07364 protein CSLA11 - cellulose synthase-like family A, expressed seq=cds; coord=4:83307146..83309743:-1; parent_gene=GRMZM2G099088'	0.75	3.55	8.55	3.5	3.5	1.9	6	12.3	3.55	5.7
GRMZM2G099101	'10.2'	'cell wall.cellulose synthesis'	'highly similar to ( 855) AT5G49720 | Symbols: ATGH9A1, DEC, KOR, RSW2, IRX2, KOR1 | ATGH9A1 (ARABIDOPSIS THALIANA GLYCOSYL HYDROLASE 9A1); cellulase/ hydrolase, hydrolyzing O-glycosyl compounds | chr5:20197765-20200168 REVERSEnearly identical (1022) GUN9_ORYSA Endoglucanase 9 (EC 3.2.1.4) (Endo-1,4-beta glucanase 9) (OsGLU1) - Oryza sativa (Rice)nearly identical (1022) loc_os03g21210 12003.m0752…	111.75	74.8	65.5	116.25	132.75	145.8	159.45	118.5	97.7	117.55
GRMZM2G100597	'10.2'	'cell wall.cellulose synthesis'	'moderately similar to ( 392) AT5G03760 | Symbols: ATCSLA09, CSLA09, ATCSLA9, CSLA9, RAT4 | ATCSLA09; mannan synthase/ transferase, transferring glycosyl groups | chr5:985910-990087 REVERSEmoderately similar to ( 378) loc_os02g09930 12002.m33592 protein CSLA1 - cellulose synthase-like family A; mannan synthase, expressed seq=cds; coord=3:204808106..204814460:1; parent_gene=GRMZM2G100597'	0	0	0	0	0	0	0	0	0	0
GRMZM2G105631	'10.2'	'cell wall.cellulose synthesis'	'highly similar to ( 757) AT5G22740 | Symbols: ATCSLA02, CSLA02, ATCSLA2 | ATCSLA02; mannan synthase/ transferase, transferring glycosyl groups | chr5:7555379-7559866 REVERSEhighly similar to ( 931) loc_os02g09930 12002.m33592 protein CSLA1 - cellulose synthase-like family A; mannan synthase, expressed seq=cds; coord=4:234112944..234120117:1; parent_gene=GRMZM2G105631'	99.45	79.65	108.2	98.8	100.25	67.35	61.45	57.75	112.15	107.05
GRMZM2G107754	'10.2'	'cell wall.cellulose synthesis'	'very weakly similar to (81.3) loc_os09g39920 12009.m06929 protein beta-1,4-mannan synthase, putative, expressed seq=cds; coord=3:204932985..204933697:-1; parent_gene=GRMZM2G107754'	0	0	0	0	0	0	0	0	0	0
GRMZM2G108600	'10.2'	'cell wall.cellulose synthesis'	'moderately similar to ( 482) AT5G03760 | Symbols: ATCSLA09, CSLA09, ATCSLA9, CSLA9, RAT4 | ATCSLA09; mannan synthase/ transferase, transferring glycosyl groups | chr5:985910-990087 REVERSEhighly similar to ( 651) loc_os08g33740 12008.m07364 protein CSLA11 - cellulose synthase-like family A, expressed seq=cds; coord=1:213151788..213154809:-1; parent_gene=GRMZM2G108600'	12.95	18.35	28.7	16.75	42.15	57.3	73.6	77.95	26.95	55.6
GRMZM2G110735	'10.2'	'cell wall.cellulose synthesis'	'highly similar to ( 858) AT5G49720 | Symbols: ATGH9A1, DEC, KOR, RSW2, IRX2, KOR1 | ATGH9A1 (ARABIDOPSIS THALIANA GLYCOSYL HYDROLASE 9A1); cellulase/ hydrolase, hydrolyzing O-glycosyl compounds | chr5:20197765-20200168 REVERSEnearly identical (1109) GUN10_ORYSA Endoglucanase 10 (EC 3.2.1.4) (Endo-1,4-beta glucanase 10) (OsGLU2) - Oryza sativa (Rice)nearly identical (1109) loc_os03g52630 12003.m3…	8.6	12.25	25.4	10.15	13.35	12.2	15.25	26.65	16.8	51.65
GRMZM2G115772	'10.2'	'cell wall.cellulose synthesis'	'highly similar to ( 608) AT5G03760 | Symbols: ATCSLA09, CSLA09, ATCSLA9, CSLA9, RAT4 | ATCSLA09; mannan synthase/ transferase, transferring glycosyl groups | chr5:985910-990087 REVERSEhighly similar to ( 780) loc_os10g26630 12010.m65488 protein CSLA2 - cellulose synthase-like family A; mannan synthase, expressed seq=cds; coord=1:242575182..242581195:-1; parent_gene=GRMZM2G115772'	10.5	7.8	12.5	12.45	8.75	10.95	12.65	12.35	13.55	22.7
GRMZM2G122431	'10.2'	'cell wall.cellulose synthesis'	'seq=cds; coord=3:145176782..145177620:1; parent_gene=GRMZM2G122431'	0.25	0.15	0.95	0.1	0.1	0.1	0	0.1	0.3	0.25
GRMZM2G135286	'10.2'	'cell wall.cellulose synthesis'	'highly similar to ( 890) AT4G31590 | Symbols: ATCSLC05, CSLC05, ATCSLC5 | ATCSLC5 (CELLULOSE-SYNTHASE LIKE C5); cellulose synthase/ transferase, transferring glycosyl groups | chr4:15309889-15312336 REVERSEnearly identical (1130) loc_os08g15420 12008.m05665 protein CSLC3 - cellulose synthase-like family C, expressed seq=cds; coord=10:52619210..52622727:-1; parent_gene=GRMZM2G135286'	0	0	0	0	0	0	0	0	0	0
GRMZM2G142685	'10.2'	'cell wall.cellulose synthesis'	'highly similar to ( 884) AT4G31590 | Symbols: ATCSLC05, CSLC05, ATCSLC5 | ATCSLC5 (CELLULOSE-SYNTHASE LIKE C5); cellulose synthase/ transferase, transferring glycosyl groups | chr4:15309889-15312336 REVERSEnearly identical (1106) loc_os08g15420 12008.m05665 protein CSLC3 - cellulose synthase-like family C, expressed seq=cds; coord=4:25464156..25468073:1; parent_gene=GRMZM2G142685'	0	0	0	0	0	0	0	0	0.05	0
GRMZM2G147849	'10.2'	'cell wall.cellulose synthesis'	'highly similar to ( 852) AT5G49720 | Symbols: ATGH9A1, DEC, KOR, RSW2, IRX2, KOR1 | ATGH9A1 (ARABIDOPSIS THALIANA GLYCOSYL HYDROLASE 9A1); cellulase/ hydrolase, hydrolyzing O-glycosyl compounds | chr5:20197765-20200168 REVERSEnearly identical (1102) GUN10_ORYSA Endoglucanase 10 (EC 3.2.1.4) (Endo-1,4-beta glucanase 10) (OsGLU2) - Oryza sativa (Rice)nearly identical (1102) loc_os03g52630 12003.m3…	3.9	4.15	15.2	5.05	3.4	2.35	4.25	6.75	2.85	41.15
GRMZM2G173759	'10.2'	'cell wall.cellulose synthesis'	'highly similar to ( 878) AT4G31590 | Symbols: ATCSLC05, CSLC05, ATCSLC5 | ATCSLC5 (CELLULOSE-SYNTHASE LIKE C5); cellulose synthase/ transferase, transferring glycosyl groups | chr4:15309889-15312336 REVERSEnearly identical (1016) loc_os09g25900 12009.m05742 protein CSLC2 - cellulose synthase-like family C, expressed seq=cds; coord=7:118581372..118584549:-1; parent_gene=GRMZM2G173759'	19.45	17.45	28.6	19.75	15.3	12.1	14.3	26.65	24.15	22.8
GRMZM2G178025	'10.2'	'cell wall.cellulose synthesis'	'highly similar to ( 684) AT5G49720 | Symbols: ATGH9A1, DEC, KOR, RSW2, IRX2, KOR1 | ATGH9A1 (ARABIDOPSIS THALIANA GLYCOSYL HYDROLASE 9A1); cellulase/ hydrolase, hydrolyzing O-glycosyl compounds | chr5:20197765-20200168 REVERSEnearly identical (1052) GUN12_ORYSA Endoglucanase 12 (EC 3.2.1.4) (Endo-1,4-beta glucanase 12) (OsGLU3) - Oryza sativa (Rice)nearly identical (1041) loc_os04g41970 12004.m0…	0.65	1.1	1.5	0.15	0.35	0.2	0.25	0.4	0.3	0.4
GRMZM2G178880	'10.2'	'cell wall.cellulose synthesis'	'highly similar to ( 603) AT5G03760 | Symbols: ATCSLA09, CSLA09, ATCSLA9, CSLA9, RAT4 | ATCSLA09; mannan synthase/ transferase, transferring glycosyl groups | chr5:985910-990087 REVERSEhighly similar to ( 818) loc_os03g07350 12003.m06249 protein CSLA4 - cellulose synthase-like family A; mannan synthase, expressed seq=cds; coord=9:151294877..151298726:-1; parent_gene=GRMZM2G178880'	8.45	5.3	8.7	8.6	9.6	8.25	8.25	9.7	16.7	12.15
GRMZM2G334142	'10.2'	'cell wall.cellulose synthesis'	'highly similar to ( 565) AT5G03760 | Symbols: ATCSLA09, CSLA09, ATCSLA9, CSLA9, RAT4 | ATCSLA09; mannan synthase/ transferase, transferring glycosyl groups | chr5:985910-990087 REVERSEweakly similar to ( 177) FLA10_CHLRE Kinesin-like protein FLA10 (Protein KHP1) - Chlamydomonas reinhardtiihighly similar to ( 578) loc_os06g42020 12006.m08734 protein CSLA9 - cellulose synthase-like family A, expre…	0.2	0.2	0.2	1.9	0.05	0.3	0.05	0.05	0.05	0
GRMZM2G405567	'10.2'	'cell wall.cellulose synthesis'	'highly similar to ( 579) AT5G03760 | Symbols: ATCSLA09, CSLA09, ATCSLA9, CSLA9, RAT4 | ATCSLA09; mannan synthase/ transferase, transferring glycosyl groups | chr5:985910-990087 REVERSEhighly similar to ( 777) loc_os02g51060 12002.m10140 protein CSLA6 - cellulose synthase-like family A; mannan synthase, expressed seq=cds; coord=5:206843800..206846928:-1; parent_gene=GRMZM2G405567'	12.65	9.1	7.5	17.15	1.75	2.3	6	8.7	2.05	5
GRMZM2G443715	'10.2'	'cell wall.cellulose synthesis'	'highly similar to ( 761) AT5G03760 | Symbols: ATCSLA09, CSLA09, ATCSLA9, CSLA9, RAT4 | ATCSLA09; mannan synthase/ transferase, transferring glycosyl groups | chr5:985910-990087 REVERSEhighly similar to ( 775) loc_os06g42020 12006.m08734 protein CSLA9 - cellulose synthase-like family A, expressed seq=cds; coord=9:98683719..98687485:-1; parent_gene=GRMZM2G443715'	0	0	0	0	0	0	0	0	0	0
GRMZM2G454081	'10.2'	'cell wall.cellulose synthesis'	'highly similar to ( 543) AT4G07960 | Symbols: ATCSLC12, CSLC12 | ATCSLC12 (CELLULOSE-SYNTHASE LIKE C12); cellulose synthase/ transferase, transferring glycosyl groups | chr4:4802628-4805114 REVERSEhighly similar to ( 711) loc_os01g56130 12001.m11769 protein CSLC1 - cellulose synthase-like family C, expressed seq=cds; coord=3:194038615..194042325:1; parent_gene=GRMZM2G454081'	72.25	60.45	45.35	76.75	50.35	42.55	47.9	39.45	125.4	40.75
GRMZM5G857303	'10.2'	'cell wall.cellulose synthesis'	'weakly similar to ( 147) AT1G14205 | Symbols: | ribosomal protein L18 family protein | chr1:4855582-4856762 FORWARDmoderately similar to ( 229) loc_os03g07340 12003.m06248 protein 50S ribosomal protein L18, chloroplast precursor, putative, expressed seq=cds; coord=1:14803451..14804370:-1; parent_gene=GRMZM5G857303'	6.75	4.95	8.8	6	5.15	6.45	6.8	16.9	4.55	9.55
GRMZM2G001361	'10.2.1'	'cell wall.cellulose synthesis.cellulose synthase'	'weakly similar to ( 189) AT1G55850 | Symbols: ATCSLE1, CSLE1 | ATCSLE1; cellulose synthase/ transferase, transferring glycosyl groups | chr1:20876752-20879414 FORWARDmoderately similar to ( 329) loc_os02g49332 12002.m34039 protein CSLE2 - cellulose synthase-like family E, expressed seq=cds; coord=1:64672346..64674038:-1; parent_gene=GRMZM2G001361'	0	0	0	0	0	0	0	0	0	0
GRMZM2G002523	'10.2.1'	'cell wall.cellulose synthesis.cellulose synthase'	'nearly identical (1689) AT5G17420 | Symbols: IRX3, CESA7, ATCESA7, MUR10 | IRX3 (IRREGULAR XYLEM 3); cellulose synthase | chr5:5736859-5741407 REVERSEnearly identical (1961) loc_os09g25490 12009.m05701 protein CESA9 - cellulose synthase, expressed seq=cds; coord=2:182334859..182339429:1; parent_gene=GRMZM2G002523'	0	0	0	0	0	0	0	0	0	0
GRMZM2G011651	'10.2.1'	'cell wall.cellulose synthesis.cellulose synthase'	'highly similar to ( 878) AT5G17420 | Symbols: IRX3, CESA7, ATCESA7, MUR10 | IRX3 (IRREGULAR XYLEM 3); cellulose synthase | chr5:5736859-5741407 REVERSEnearly identical (1068) loc_os09g25490 12009.m05701 protein CESA9 - cellulose synthase, expressed seq=cds; coord=5:49637450..49642023:1; parent_gene=GRMZM2G011651'	0	0	0	0	0	0	0	0	0	0
GRMZM2G012044	'10.2.1'	'cell wall.cellulose synthesis.cellulose synthase'	'highly similar to ( 703) AT1G55850 | Symbols: ATCSLE1, CSLE1 | ATCSLE1; cellulose synthase/ transferase, transferring glycosyl groups | chr1:20876752-20879414 FORWARDnearly identical (1202) loc_os02g49332 12002.m34039 protein CSLE2 - cellulose synthase-like family E, expressed seq=cds; coord=5:204318262..204322524:1; parent_gene=GRMZM2G012044'	34.3	33.35	28.7	34.55	26.05	22.45	18.05	18.45	40.45	22.2
GRMZM2G014558	'10.2.1'	'cell wall.cellulose synthesis.cellulose synthase'	'highly similar to ( 724) AT1G55850 | Symbols: ATCSLE1, CSLE1 | ATCSLE1; cellulose synthase/ transferase, transferring glycosyl groups | chr1:20876752-20879414 FORWARDnearly identical (1039) loc_os09g30130 12009.m060004 protein CSLE6 - cellulose synthase-like family E, expressed seq=cds; coord=7:130702635..130707750:-1; parent_gene=GRMZM2G014558'	0.95	3.4	16.1	1.7	2.65	2.15	5.8	13.7	0.6	5.25
GRMZM2G015886	'10.2.1'	'cell wall.cellulose synthesis.cellulose synthase'	'nearly identical (1518) AT1G02730 | Symbols: ATCSLD5, CSLD5 | ATCSLD5; 1,4-beta-D-xylan synthase/ cellulose synthase | chr1:594697-598473 REVERSEnearly identical (1830) loc_os12g36890 12012.m07474 protein CSLD4 - cellulose synthase-like family D, expressed seq=cds; coord=10:22261833..22266237:1; parent_gene=GRMZM2G015886'	86.05	70.4	102.45	120.4	110.6	101.6	126.3	102.55	100.25	134.35
GRMZM2G018241	'10.2.1'	'cell wall.cellulose synthesis.cellulose synthase'	'nearly identical (1647) AT5G05170 | Symbols: CESA3, IXR1, ATCESA3, ATH-B, CEV1 | CEV1 (CONSTITUTIVE EXPRESSION OF VSP 1); cellulose synthase/ transferase, transferring glycosyl groups | chr5:1530401-1535090 REVERSEnearly identical (2041) loc_os07g10770 12007.m05532 protein CESA8 - cellulose synthase, expressed seq=cds; coord=2:161123950..161130108:1; parent_gene=GRMZM2G018241'	0.05	0	0	0.05	0.15	0.05	0	0	0.05	0.05	cellulose synthase9
GRMZM2G023399	'10.2.1'	'cell wall.cellulose synthesis.cellulose synthase'	'weakly similar to ( 199) AT2G21770 | Symbols: CESA9, CESA09 | CESA9 (CELLULOSE SYNTHASE A9); cellulose synthase/ transferase, transferring glycosyl groups | chr2:9284837-9289495 FORWARDmoderately similar to ( 201) loc_os07g14850 12007.m05929 protein CESA6 - cellulose synthase, expressed seq=cds; coord=4:239130824..239135058:1; parent_gene=GRMZM2G023399'	0	0	0	0	0	0	0	0	0	0
GRMZM2G025231	'10.2.1'	'cell wall.cellulose synthesis.cellulose synthase'	'nearly identical (1015) AT4G39350 | Symbols: CESA2, ATH-A, ATCESA2 | CESA2 (CELLULOSE SYNTHASE A2); cellulose synthase/ transferase, transferring glycosyl groups | chr4:18297078-18301890 FORWARDnearly identical (1333) loc_os07g24190 12007.m28970 protein CESA3 - cellulose synthase, expressed seq=cds; coord=7:37024548..37030325:-1; parent_gene=GRMZM2G025231'	16.85	16.8	36.85	25.55	40.6	28.15	27.7	19.65	27.75	46.15	cellulose synthase7
GRMZM2G027723	'10.2.1'	'cell wall.cellulose synthesis.cellulose synthase'	'nearly identical (1722) AT4G32410 | Symbols: CESA1, RSW1 | CESA1 (CELLULOSE SYNTHASE 1); cellulose synthase/ transferase, transferring glycosyl groups | chr4:15641009-15646388 REVERSEnearly identical (2003) loc_os05g08370 12005.m05354 protein CESA1 - cellulose synthase, expressed seq=cds; coord=6:128560617..128567071:1; parent_gene=GRMZM2G027723'	22.95	21.65	37.9	31.45	48.25	37.95	46.55	30.7	47.55	61.35	cellulose synthase2
GRMZM2G028353	'10.2.1'	'cell wall.cellulose synthesis.cellulose synthase'	'nearly identical (1511) AT4G39350 | Symbols: CESA2, ATH-A, ATCESA2 | CESA2 (CELLULOSE SYNTHASE A2); cellulose synthase/ transferase, transferring glycosyl groups | chr4:18297078-18301890 FORWARDnearly identical (1915) loc_os07g24190 12007.m28970 protein CESA3 - cellulose synthase, expressed seq=cds; coord=2:169757704..169763555:1; parent_gene=GRMZM2G028353'	49.55	43.1	70.95	61.4	82.85	59.7	57.25	71.25	74.95	64.35
GRMZM2G037413	'10.2.1'	'cell wall.cellulose synthesis.cellulose synthase'	'nearly identical (1425) AT4G18780 | Symbols: CESA8, IRX1, ATCESA8, LEW2 | IRX1 (IRREGULAR XYLEM 1); cellulose synthase/ transferase, transferring glycosyl groups | chr4:10312846-10316719 REVERSEnearly identical (1739) loc_os01g54620 12001.m11625 protein CESA4 - cellulose synthase, expressed seq=cds; coord=2:29352837..29358720:1; parent_gene=GRMZM2G037413'	0	0	0	0	0	0	0	0	0	0
GRMZM2G039454	'10.2.1'	'cell wall.cellulose synthesis.cellulose synthase'	'nearly identical (1729) AT4G32410 | Symbols: CESA1, RSW1 | CESA1 (CELLULOSE SYNTHASE 1); cellulose synthase/ transferase, transferring glycosyl groups | chr4:15641009-15646388 REVERSEnearly identical (1939) loc_os05g08370 12005.m05354 protein CESA1 - cellulose synthase, expressed seq=cds; coord=3:11642850..11649787:1; parent_gene=GRMZM2G039454'	328.05	323.45	216.2	322.55	174.75	225.1	209.95	209.75	197.25	247.1	cellulose synthase3
GRMZM2G044269	'10.2.1'	'cell wall.cellulose synthesis.cellulose synthase'	'nearly identical (1679) AT4G38190 | Symbols: ATCSLD4, CSLD4 | ATCSLD4; cellulose synthase/ transferase, transferring glycosyl groups | chr4:17910096-17913641 REVERSEnearly identical (1967) loc_os08g25710 12008.m06587 protein CSLD3 - cellulose synthase-like family D, expressed seq=cds; coord=1:221785673..221789403:1; parent_gene=GRMZM2G044269'	0	0	0	0	0	0	0	0	0	0
GRMZM2G055795	'10.2.1'	'cell wall.cellulose synthesis.cellulose synthase'	'nearly identical (1425) AT4G18780 | Symbols: CESA8, IRX1, ATCESA8, LEW2 | IRX1 (IRREGULAR XYLEM 1); cellulose synthase/ transferase, transferring glycosyl groups | chr4:10312846-10316719 REVERSEnearly identical (1739) loc_os01g54620 12001.m11625 protein CESA4 - cellulose synthase, expressed seq=cds; coord=3:198366496..198372124:1; parent_gene=GRMZM2G055795'	0	0	0	0	0	0	0	0	0.05	0
GRMZM2G061764	'10.2.1'	'cell wall.cellulose synthesis.cellulose synthase'	'nearly identical (1377) AT2G33100 | Symbols: ATCSLD1, CSLD1 | ATCSLD1; cellulose synthase/ transferase, transferring glycosyl groups | chr2:14036494-14040044 REVERSEnearly identical (1662) loc_os06g22980 12006.m06951 protein CSLD5 - cellulose synthase-like family D, expressed seq=cds; coord=9:51950777..51954029:-1; parent_gene=GRMZM2G061764'	0	0	0	0	0	0	0	0	0	0
GRMZM2G074546	'10.2.1'	'cell wall.cellulose synthesis.cellulose synthase'	'moderately similar to ( 213) AT2G32540 | Symbols: ATCSLB04, CSLB04, ATCSLB4 | ATCSLB04; cellulose synthase/ transferase/ transferase, transferring glycosyl groups | chr2:13814686-13818289 FORWARDmoderately similar to ( 409) loc_os04g35020 12004.m08594 protein CSLH2 - cellulose synthase-like family H, expressed seq=cds; coord=2:51752877..51754858:1; parent_gene=GRMZM2G074546'	0	0	0.1	0.05	0.2	0.25	0.1	0.1	0.25	0
GRMZM2G082580	'10.2.1'	'cell wall.cellulose synthesis.cellulose synthase'	'nearly identical (1064) AT4G39350 | Symbols: CESA2, ATH-A, ATCESA2 | CESA2 (CELLULOSE SYNTHASE A2); cellulose synthase/ transferase, transferring glycosyl groups | chr4:18297078-18301890 FORWARDnearly identical (1390) loc_os07g14850 12007.m05929 protein CESA6 - cellulose synthase, expressed seq=cds; coord=2:170771611..170775663:1; parent_gene=GRMZM2G082580'	0.4	0.4	0.2	2.35	0.5	0.45	0.6	0.05	0.4	0.3
GRMZM2G103972	'10.2.1'	'cell wall.cellulose synthesis.cellulose synthase'	'highly similar to ( 755) AT1G02730 | Symbols: ATCSLD5, CSLD5 | ATCSLD5; 1,4-beta-D-xylan synthase/ cellulose synthase | chr1:594697-598473 REVERSEnearly identical (1262) loc_os07g36690 12007.m07919 protein CSLF2 - cellulose synthase-like family F; beta1,3;1,4 glucan synthase, expressed seq=cds; coord=7:156222296..156226604:-1; parent_gene=GRMZM2G103972'	0	0	0	0	0	0	0	0	0	0
GRMZM2G104092	'10.2.1'	'cell wall.cellulose synthesis.cellulose synthase'	'highly similar to ( 737) AT4G32410 | Symbols: CESA1, RSW1 | CESA1 (CELLULOSE SYNTHASE 1); cellulose synthase/ transferase, transferring glycosyl groups | chr4:15641009-15646388 REVERSEhighly similar to ( 811) loc_os05g08370 12005.m05354 protein CESA1 - cellulose synthase, expressed seq=cds; coord=9:64924031..64927239:1; parent_gene=GRMZM2G104092'	0	0	0	0	0	0	0	0	0	0
GRMZM2G110145	'10.2.1'	'cell wall.cellulose synthesis.cellulose synthase'	'highly similar to ( 886) AT5G16910 | Symbols: ATCSLD2, CSLD2 | CSLD2 (CELLULOSE-SYNTHASE LIKE D2); cellulose synthase/ transferase, transferring glycosyl groups | chr5:5561679-5565290 FORWARDnearly identical (1536) loc_os08g06380 12008.m04777 protein CSLF6 - cellulose synthase-like family F; beta1,3;1,4 glucan synthase, expressed seq=cds; coord=10:77269241..77276091:1; parent_gene=GRMZM2G110145'	4.2	2.65	7.35	5.35	6.8	3.95	10.75	8.35	4.05	5.3
GRMZM2G111642	'10.2.1'	'cell wall.cellulose synthesis.cellulose synthase'	'nearly identical (1689) AT5G05170 | Symbols: CESA3, IXR1, ATCESA3, ATH-B, CEV1 | CEV1 (CONSTITUTIVE EXPRESSION OF VSP 1); cellulose synthase/ transferase, transferring glycosyl groups | chr5:1530401-1535090 REVERSEnearly identical (2018) loc_os03g59340 12003.m10832 protein CESA2 - cellulose synthase, expressed seq=cds; coord=1:290593939..290599907:-1; parent_gene=GRMZM2G111642'	92.65	111.1	75.1	85.8	56.9	55.2	57.1	59.3	61.55	66.85	cellulose synthase5
GRMZM2G112336	'10.2.1'	'cell wall.cellulose synthesis.cellulose synthase'	'nearly identical (1738) AT4G32410 | Symbols: CESA1, RSW1 | CESA1 (CELLULOSE SYNTHASE 1); cellulose synthase/ transferase, transferring glycosyl groups | chr4:15641009-15646388 REVERSEnearly identical (2013) loc_os05g08370 12005.m05354 protein CESA1 - cellulose synthase, expressed seq=cds; coord=8:80220224..80226330:1; parent_gene=GRMZM2G112336'	15.4	17.95	29.3	19.4	30.3	26.25	29.35	21.35	31.8	46.45	cellulose synthase1
GRMZM2G113137	'10.2.1'	'cell wall.cellulose synthesis.cellulose synthase'	'nearly identical (1522) AT5G64740 | Symbols: CESA6, IXR2, E112, PRC1 | CESA6 (CELLULOSE SYNTHASE 6); cellulose synthase/ transferase, transferring glycosyl groups | chr5:25881555-25886333 FORWARDnearly identical (2005) loc_os03g62090 12003.m11087 protein CESA5 - cellulose synthase, expressed seq=cds; coord=1:296254082..296259864:1; parent_gene=GRMZM2G113137'	68.85	79.35	63.7	76.6	66.1	69.05	72.25	51.85	68.65	77.7	cellulose synthase6
GRMZM2G113432	'10.2.1'	'cell wall.cellulose synthesis.cellulose synthase'	'highly similar to ( 694) AT5G16910 | Symbols: ATCSLD2, CSLD2 | CSLD2 (CELLULOSE-SYNTHASE LIKE D2); cellulose synthase/ transferase, transferring glycosyl groups | chr5:5561679-5565290 FORWARDnearly identical (1286) loc_os07g36630 12007.m07914 protein CSLF8 - cellulose synthase-like family F; beta1,3;1,4 glucan synthase, expressed seq=cds; coord=7:156212342..156216943:-1; parent_gene=GRMZM2G11343…	10.25	13	7.65	11.35	8.8	7.1	8.45	5.55	11.3	9.1
GRMZM2G122277	'10.2.1'	'cell wall.cellulose synthesis.cellulose synthase'	'highly similar to ( 862) AT5G16910 | Symbols: ATCSLD2, CSLD2 | CSLD2 (CELLULOSE-SYNTHASE LIKE D2); cellulose synthase/ transferase, transferring glycosyl groups | chr5:5561679-5565290 FORWARDnearly identical (1518) loc_os08g06380 12008.m04777 protein CSLF6 - cellulose synthase-like family F; beta1,3;1,4 glucan synthase, expressed seq=cds; coord=4:31242304..31248685:1; parent_gene=GRMZM2G122277'	5.95	3.3	8.25	7.65	6.6	6.3	8.2	9.65	6.7	12.75
GRMZM2G142898	'10.2.1'	'cell wall.cellulose synthesis.cellulose synthase'	'nearly identical (1682) AT5G17420 | Symbols: IRX3, CESA7, ATCESA7, MUR10 | IRX3 (IRREGULAR XYLEM 3); cellulose synthase | chr5:5736859-5741407 REVERSEnearly identical (1953) loc_os09g25490 12009.m05701 protein CESA9 - cellulose synthase, expressed seq=cds; coord=7:117513258..117517731:1; parent_gene=GRMZM2G142898'	0.35	0.65	0.65	0.7	1.1	0	0	0.1	0.4	10.35
GRMZM2G150404	'10.2.1'	'cell wall.cellulose synthesis.cellulose synthase'	'nearly identical (1026) AT5G05170 | Symbols: CESA3, IXR1, ATCESA3, ATH-B, CEV1 | CEV1 (CONSTITUTIVE EXPRESSION OF VSP 1); cellulose synthase/ transferase, transferring glycosyl groups | chr5:1530401-1535090 REVERSEnearly identical (1093) loc_os07g10770 12007.m05532 protein CESA8 - cellulose synthase, expressed seq=cds; coord=2:161135362..161138301:1; parent_gene=GRMZM2G150404'	0	0	0	0	0	0	0	0	0	0
GRMZM2G164761	'10.2.1'	'cell wall.cellulose synthesis.cellulose synthase'	'highly similar to ( 571) AT5G17420 | Symbols: IRX3, CESA7, ATCESA7, MUR10 | IRX3 (IRREGULAR XYLEM 3); cellulose synthase | chr5:5736859-5741407 REVERSEhighly similar to ( 940) loc_os10g20260 12010.m05047 protein CSLF7 - cellulose synthase-like family F; beta1,3;1,4 glucan synthase, expressed seq=cds; coord=1:239207467..239210906:-1; parent_gene=GRMZM2G164761'	0	0	0	0	0	0	0	0	0	0
GRMZM2G177631	'10.2.1'	'cell wall.cellulose synthesis.cellulose synthase'	'nearly identical (1554) AT4G39350 | Symbols: CESA2, ATH-A, ATCESA2 | CESA2 (CELLULOSE SYNTHASE A2); cellulose synthase/ transferase, transferring glycosyl groups | chr4:18297078-18301890 FORWARDnearly identical (1955) loc_os07g14850 12007.m05929 protein CESA6 - cellulose synthase, expressed seq=cds; coord=7:26487882..26493965:1; parent_gene=GRMZM2G177631'	24	22.25	36.7	30.85	27.7	30.85	41.65	31.4	30.1	55.05	cellulose synthase8
GRMZM2G333619	'10.2.1'	'cell wall.cellulose synthesis.cellulose synthase'	'weakly similar to ( 144) AT4G32410 | Symbols: CESA1, RSW1 | CESA1 (CELLULOSE SYNTHASE 1); cellulose synthase/ transferase, transferring glycosyl groups | chr4:15641009-15646388 REVERSEweakly similar to ( 169) loc_os05g08370 12005.m05354 protein CESA1 - cellulose synthase, expressed seq=cds; coord=3:127552812..127559133:1; parent_gene=GRMZM2G333619'	0.05	0.1	0.35	0	0.25	0.1	0	0	0.4	0
GRMZM2G339645	'10.2.1'	'cell wall.cellulose synthesis.cellulose synthase'	'highly similar to ( 709) AT3G03050 | Symbols: CSLD3, KJK, ATCSLD3 | CSLD3 (CELLULOSE SYNTHASE-LIKE D3); cellulose synthase/ transferase, transferring glycosyl groups | chr3:687873-691629 FORWARDnearly identical (1295) loc_os07g36750 12007.m07925 protein CSLF3 - cellulose synthase-like family F; beta1,3;1,4 glucan synthase, expressed seq=cds; coord=7:156285428..156288692:1; parent_gene=GRMZM2G339…	0	0	0.3	0	0	0	0	0	0.05	0
GRMZM2G349834	'10.2.1'	'cell wall.cellulose synthesis.cellulose synthase'	'moderately similar to ( 496) AT5G17420 | Symbols: IRX3, CESA7, ATCESA7, MUR10 | IRX3 (IRREGULAR XYLEM 3); cellulose synthase | chr5:5736859-5741407 REVERSEmoderately similar to ( 498) loc_os09g25490 12009.m05701 protein CESA9 - cellulose synthase, expressed seq=cds; coord=6:102678170..102681460:-1; parent_gene=GRMZM2G349834'	0	0	0	0	0	0	0	0	0	0
GRMZM2G367267	'10.2.1'	'cell wall.cellulose synthesis.cellulose synthase'	'highly similar to ( 632) AT3G03050 | Symbols: CSLD3, KJK, ATCSLD3 | CSLD3 (CELLULOSE SYNTHASE-LIKE D3); cellulose synthase/ transferase, transferring glycosyl groups | chr3:687873-691629 FORWARDnearly identical (1132) loc_os07g36750 12007.m07925 protein CSLF3 - cellulose synthase-like family F; beta1,3;1,4 glucan synthase, expressed seq=cds; coord=2:204658043..204661597:-1; parent_gene=GRMZM2G36…	0	0	0	0	0	0	0	0	0	0
GRMZM2G378836	'10.2.1'	'cell wall.cellulose synthesis.cellulose synthase'	'moderately similar to ( 496) AT5G09870 | Symbols: CESA5 | CESA5 (CELLULOSE SYNTHASE 5); cellulose synthase/ transferase, transferring glycosyl groups | chr5:3073356-3077974 FORWARDmoderately similar to ( 448) loc_os03g62090 12003.m11087 protein CESA5 - cellulose synthase, expressed seq=cds; coord=9:99092525..99096020:-1; parent_gene=GRMZM2G378836'	0	0.05	0.05	0.2	0.05	0.05	0	0.05	0.1	0
GRMZM2G424832	'10.2.1'	'cell wall.cellulose synthesis.cellulose synthase'	'nearly identical (1679) AT5G05170 | Symbols: CESA3, IXR1, ATCESA3, ATH-B, CEV1 | CEV1 (CONSTITUTIVE EXPRESSION OF VSP 1); cellulose synthase/ transferase, transferring glycosyl groups | chr5:1530401-1535090 REVERSEnearly identical (2085) loc_os07g10770 12007.m05532 protein CESA8 - cellulose synthase, expressed seq=cds; coord=7:18609337..18615348:-1; parent_gene=GRMZM2G424832'	18.95	21.45	23.55	18.25	14.2	11.7	12.9	15.6	17.15	21.45
GRMZM2G436299	'10.2.1'	'cell wall.cellulose synthesis.cellulose synthase'	'nearly identical (1743) AT3G03050 | Symbols: CSLD3, KJK, ATCSLD3 | CSLD3 (CELLULOSE SYNTHASE-LIKE D3); cellulose synthase/ transferase, transferring glycosyl groups | chr3:687873-691629 FORWARDnearly identical (1914) loc_os10g42750 12010.m07027 protein CSLD1 - cellulose synthase-like family D, expressed seq=cds; coord=1:104608860..104612984:1; parent_gene=GRMZM2G436299'	0	0	0	0	0	0	0	0	0	0
GRMZM2G445905	'10.2.1'	'cell wall.cellulose synthesis.cellulose synthase'	'nearly identical (1522) AT5G44030 | Symbols: CESA4, IRX5, NWS2 | CESA4 (CELLULOSE SYNTHASE A4); cellulose synthase/ transferase, transferring glycosyl groups | chr5:17714713-17719564 FORWARDmoderately similar to ( 364) IF4E2_MAIZE Eukaryotic translation initiation factor 4E-2 (eIF4E-2) (eIF-4E-2) (mRNA cap-binding protein) (eIF-(iso)4F 25 kDa subunit) (eIF-(iso)4F p28 subunit) - Zea mays (Maize)…	77.8	91.7	90.7	77.05	90	100.8	94.35	103.1	68.65	91.3
GRMZM2G470499	'10.2.1'	'cell wall.cellulose synthesis.cellulose synthase'	'moderately similar to ( 228) AT4G18780 | Symbols: CESA8, IRX1, ATCESA8, LEW2 | IRX1 (IRREGULAR XYLEM 1); cellulose synthase/ transferase, transferring glycosyl groups | chr4:10312846-10316719 REVERSEmoderately similar to ( 260) loc_os01g54620 12001.m11625 protein CESA4 - cellulose synthase, expressed seq=cds; coord=8:174322948..174326592:1; parent_gene=GRMZM2G470499'	0.45	0.25	0.9	0.45	2.3	2.95	1.4	1.05	3	0.7
GRMZM5G821437	'10.2.1'	'cell wall.cellulose synthesis.cellulose synthase'	'very weakly similar to ( 100) AT4G32410 | Symbols: CESA1, RSW1 | CESA1 (CELLULOSE SYNTHASE 1); cellulose synthase/ transferase, transferring glycosyl groups | chr4:15641009-15646388 REVERSEweakly similar to ( 104) loc_os01g54620 12001.m11625 protein CESA4 - cellulose synthase, expressed seq=cds; coord=8:174328855..174330090:-1; parent_gene=GRMZM5G821437'	0	0	0	0	0	0	0	0	0	0
GRMZM5G870176	'10.2.1'	'cell wall.cellulose synthesis.cellulose synthase'	'nearly identical (1836) AT3G03050 | Symbols: CSLD3, KJK, ATCSLD3 | CSLD3 (CELLULOSE SYNTHASE-LIKE D3); cellulose synthase/ transferase, transferring glycosyl groups | chr3:687873-691629 FORWARDnearly identical (2069) loc_os06g02180 12006.m04952 protein CSLD2 - cellulose synthase-like family D, expressed seq=cds; coord=9:26601450..26606727:-1; parent_gene=GRMZM5G870176'	53.9	60.45	56.8	57.75	33.7	29.9	33.85	35.15	36.8	49
GRMZM2G006830	'10.2.2'	'cell wall.cellulose synthesis.COBRA'	'very weakly similar to ( 100) AT4G16120 | Symbols: ATSEB1, COBL7, SEB1 | COBL7 (COBRA-LIKE 7) | chr4:9116591-9119138 REVERSEweakly similar to ( 138) loc_os03g18910 12003.m07310 protein COBRA-like protein 7 precursor, putative, expressed seq=cds; coord=9:136576621..136577373:-1; parent_gene=GRMZM2G006830'	0	0	0	0	0	0	0	0	0	0
GRMZM2G056627	'10.2.2'	'cell wall.cellulose synthesis.COBRA'	'highly similar to ( 774) AT3G20580 | Symbols: COBL10 | COBL10 (COBRA-LIKE PROTEIN 10 PRECURSOR) | chr3:7188063-7190416 REVERSEweakly similar to ( 153) COBL1_ORYSA COBRA-like 1 protein precursor (BRITTLE CULM1-like 6 protein) - Oryza sativa (Rice)nearly identical (1078) loc_os06g47110 12006.m09237 protein COBRA-like protein 7 precursor, putative, expressed seq=cds; coord=7:154119299..154121833:-1…	0	0	0	0	0	0	0	0	0	0
GRMZM2G071970	'10.2.2'	'cell wall.cellulose synthesis.COBRA'	'highly similar to ( 690) AT5G60920 | Symbols: COB | COB (COBRA) | chr5:24511466-24513932 REVERSEhighly similar to ( 825) COBL3_ORYSA COBRA-like 3 protein precursor (BRITTLE CULM1-like 4 protein) - Oryza sativa (Rice)highly similar to ( 825) loc_os05g32110 12005.m083711 protein COBRA-like protein 4 precursor, putative, expressed seq=cds; coord=5:6906013..6909642:1; parent_gene=GRMZM2G071970'	25.8	22.65	26.75	31.4	45.1	33.5	41.95	34.5	30.7	61.15
GRMZM2G109326	'10.2.2'	'cell wall.cellulose synthesis.COBRA'	'highly similar to ( 647) AT5G15630 | Symbols: COBL4, IRX6 | IRX6 | chr5:5084842-5086545 FORWARDhighly similar to ( 733) COBL5_ORYSA COBRA-like 5 protein precursor (Protein BRITTLE CULM1) - Oryza sativa (Rice)highly similar to ( 733) loc_os03g30250 12003.m08287 protein phytochelatin synthetase-like conserved region family protein, expressed seq=cds; coord=9:123238778..123241089:1; parent_gene=GRM…	0	0	0.05	0	0	0	0	0	0	0
GRMZM2G167497	'10.2.2'	'cell wall.cellulose synthesis.COBRA'	'highly similar to ( 672) AT5G15630 | Symbols: COBL4, IRX6 | IRX6 | chr5:5084842-5086545 FORWARDhighly similar to ( 751) COBL6_ORYSA COBRA-like 6 protein precursor (BRITTLE CULM1-like 7 protein) - Oryza sativa (Rice)highly similar to ( 736) loc_os07g41320 12007.m08368 protein phytochelatin synthetase-like conserved region family protein, expressed seq=cds; coord=7:164200355..164202965:-1; parent_…	0.1	0.5	1.05	0.15	0.55	0	0	0.05	0.05	9.65
GRMZM2G167520	'10.2.2'	'cell wall.cellulose synthesis.COBRA'	'highly similar to ( 665) AT3G02210 | Symbols: COBL1 | COBL1 (COBRA-LIKE PROTEIN 1 PRECURSOR) | chr3:409352-411478 REVERSEhighly similar to ( 742) COBL1_ORYSA COBRA-like 1 protein precursor (BRITTLE CULM1-like 6 protein) - Oryza sativa (Rice)highly similar to ( 742) loc_os07g41310 12007.m08367 protein COBRA-like protein 4 precursor, putative, expressed seq=cds; coord=7:164197666..164200281:1; par…	0.5	0.5	0.45	0.45	0.6	0.1	0.15	0.35	0.15	4.4
GRMZM2G308873	'10.2.2'	'cell wall.cellulose synthesis.COBRA'	'weakly similar to ( 196) AT5G60920 | Symbols: COB | COB (COBRA) | chr5:24511466-24513932 REVERSEmoderately similar to ( 221) COBL3_ORYSA COBRA-like 3 protein precursor (BRITTLE CULM1-like 4 protein) - Oryza sativa (Rice)moderately similar to ( 225) loc_os03g54750 12003.m10392 protein COBRA-like protein 4 precursor, putative, expressed seq=cds; coord=1:189200780..189201223:1; parent_gene=GRMZM2G3…	0	0	0	0	0	0	0	0	0	0
GRMZM2G353276	'10.2.2'	'cell wall.cellulose synthesis.COBRA'	'highly similar to ( 607) AT4G16120 | Symbols: ATSEB1, COBL7, SEB1 | COBL7 (COBRA-LIKE 7) | chr4:9116591-9119138 REVERSEweakly similar to ( 137) COBL6_ORYSA COBRA-like 6 protein precursor (BRITTLE CULM1-like 7 protein) - Oryza sativa (Rice)highly similar to ( 837) loc_os07g49080 12007.m09117 protein COBRA-like protein 7 precursor, putative, expressed seq=cds; coord=2:217976194..217978479:-1; pare…	0.9	0.85	2.1	1.35	1	1.8	0.35	3.45	2.2	2.3
GRMZM2G377215	'10.2.2'	'cell wall.cellulose synthesis.COBRA'	'highly similar to ( 669) AT4G16120 | Symbols: ATSEB1, COBL7, SEB1 | COBL7 (COBRA-LIKE 7) | chr4:9116591-9119138 REVERSEweakly similar to ( 164) COBL1_ORYSA COBRA-like 1 protein precursor (BRITTLE CULM1-like 6 protein) - Oryza sativa (Rice)nearly identical (1147) loc_os03g18910 12003.m07310 protein COBRA-like protein 7 precursor, putative, expressed seq=cds; coord=1:47504495..47506979:1; parent_g…	20.2	24.75	23.1	23.7	24.75	20.15	25.9	16.05	19.1	24.45	roothair defective3
GRMZM2G465188	'10.2.2'	'cell wall.cellulose synthesis.COBRA'	'moderately similar to ( 461) AT3G02210 | Symbols: COBL1 | COBL1 (COBRA-LIKE PROTEIN 1 PRECURSOR) | chr3:409352-411478 REVERSEhighly similar to ( 597) COBL7_ORYSA COBRA-like 7 protein precursor (BRITTLE CULM1-like 3 protein) - Oryza sativa (Rice)moderately similar to ( 456) loc_os05g32110 12005.m083711 protein COBRA-like protein 4 precursor, putative, expressed seq=cds; coord=2:21872675..21874781…	0	0.1	0	0.1	0	0	0	0	0	0
GRMZM5G826714	'10.2.2'	'cell wall.cellulose synthesis.COBRA'	'highly similar to ( 680) AT5G60920 | Symbols: COB | COB (COBRA) | chr5:24511466-24513932 REVERSEhighly similar to ( 805) COBL3_ORYSA COBRA-like 3 protein precursor (BRITTLE CULM1-like 4 protein) - Oryza sativa (Rice)highly similar to ( 805) loc_os05g32110 12005.m083711 protein COBRA-like protein 4 precursor, putative, expressed seq=cds; coord=1:277379848..277383311:-1; parent_gene=GRMZM5G826714'	34.95	24.95	47.3	38.75	54.1	41.6	49.25	44.1	36.75	56.7
AC203019.3_FG001	'10.3'	'cell wall.hemicellulose synthesis'	'very weakly similar to (83.2) AT1G74800 | Symbols: | galactosyltransferase family protein | chr1:28102221-28104993 REVERSEweakly similar to ( 106) loc_os03g48610 12003.m09869 protein transferase, transferring glycosyl groups, putative, expressed seq=cds; coord=1:262565832..262566592:-1; parent_gene=AC203019.3_FG001'	0	0	0	0	0	0	0	0	0	0
AC206332.3_FG005	'10.3'	'cell wall.hemicellulose synthesis'	'moderately similar to ( 459) AT1G26810 | Symbols: GALT1 | GALT1 (GALACTOSYLTRANSFERASE1); UDP-galactose:N-glycan beta-1,3-galactosyltransferase/ transferase, transferring glycosyl groups / transferase, transferring hexosyl groups | chr1:9286862-9289327 REVERSEhighly similar to ( 660) loc_os02g36770 12002.m08764 protein beta 1, 3 galactosyltransferase, putative, expressed seq=cds; coord=4:1254923…	0	0	0.15	0.05	0	0	0	1.7	0.05	0.05
GRMZM2G008159	'10.3'	'cell wall.hemicellulose synthesis'	'very weakly similar to (89.4) AT2G03220 | Symbols: FT1, ATFUT1, ATFT1, MUR2 | FT1 (FUCOSYLTRANSFERASE 1); fucosyltransferase/ transferase, transferring glycosyl groups | chr2:970401-972353 REVERSEvery weakly similar to (94.4) FUT1_PEA Galactoside 2-alpha-L-fucosyltransferase (EC 2.4.1.69) (Xyloglucan alpha-(1,2)-fucosyltransferase) (PsFT1) - Pisum sativum (Garden pea)weakly similar to ( 119) loc…	0	0	0	0	0	0	0	0	0	0
GRMZM2G015654	'10.3'	'cell wall.hemicellulose synthesis'	'moderately similar to ( 333) AT2G03220 | Symbols: FT1, ATFUT1, ATFT1, MUR2 | FT1 (FUCOSYLTRANSFERASE 1); fucosyltransferase/ transferase, transferring glycosyl groups | chr2:970401-972353 REVERSEmoderately similar to ( 331) FUT1_PEA Galactoside 2-alpha-L-fucosyltransferase (EC 2.4.1.69) (Xyloglucan alpha-(1,2)-fucosyltransferase) (PsFT1) - Pisum sativum (Garden pea)highly similar to ( 604) loc_o…	0	0	0	0	0	0	0	0	0	0
GRMZM2G015983	'10.3'	'cell wall.hemicellulose synthesis'	'moderately similar to ( 481) AT2G03220 | Symbols: FT1, ATFUT1, ATFT1, MUR2 | FT1 (FUCOSYLTRANSFERASE 1); fucosyltransferase/ transferase, transferring glycosyl groups | chr2:970401-972353 REVERSEmoderately similar to ( 473) FUT1_PEA Galactoside 2-alpha-L-fucosyltransferase (EC 2.4.1.69) (Xyloglucan alpha-(1,2)-fucosyltransferase) (PsFT1) - Pisum sativum (Garden pea)highly similar to ( 840) loc_o…	0.05	0.1	0.45	0.2	0.1	0.2	0.2	0.6	1.1	0.8
GRMZM2G016338	'10.3'	'cell wall.hemicellulose synthesis'	'moderately similar to ( 479) AT2G20370 | Symbols: KAM1, MUR3 | MUR3 (MURUS 3); catalytic/ transferase, transferring glycosyl groups | chr2:8792355-8794214 FORWARDhighly similar to ( 502) KATAM_ORYSA Xyloglucan galactosyltransferase KATAMARI1 homolog (EC 2.4.1.-) - Oryza sativa (Rice)highly similar to ( 701) loc_os03g05070 12003.m06031 protein xyloglucan galactosyltransferase KATAMARI 1, putative…	0	0	0	0	0	0	0	0	0	0
GRMZM2G042607	'10.3'	'cell wall.hemicellulose synthesis'	'highly similar to ( 696) AT1G26810 | Symbols: GALT1 | GALT1 (GALACTOSYLTRANSFERASE1); UDP-galactose:N-glycan beta-1,3-galactosyltransferase/ transferase, transferring glycosyl groups / transferase, transferring hexosyl groups | chr1:9286862-9289327 REVERSEnearly identical (1096) loc_os06g12390 12006.m091654 protein transferase, transferring glycosyl groups, putative, expressed seq=cds; coord=6:1…	23.85	21.5	20.55	27.8	25.45	17.1	15.05	17.75	25.95	32.3
GRMZM2G054350	'10.3'	'cell wall.hemicellulose synthesis'	'moderately similar to ( 315) AT5G62620 | Symbols: | galactosyltransferase family protein | chr5:25137136-25139433 FORWARDmoderately similar to ( 475) loc_os03g58920 12003.m10795 protein galactosyltransferase/ transferase, transferring hexosyl groups, putative, expressed seq=cds; coord=5:3768079..3769563:1; parent_gene=GRMZM2G054350'	46.1	58.2	43	45.8	33.75	37.95	32.2	26.15	38	58.75
GRMZM2G080696	'10.3'	'cell wall.hemicellulose synthesis'	'moderately similar to ( 407) AT2G03220 | Symbols: FT1, ATFUT1, ATFT1, MUR2 | FT1 (FUCOSYLTRANSFERASE 1); fucosyltransferase/ transferase, transferring glycosyl groups | chr2:970401-972353 REVERSEmoderately similar to ( 392) FUT1_PEA Galactoside 2-alpha-L-fucosyltransferase (EC 2.4.1.69) (Xyloglucan alpha-(1,2)-fucosyltransferase) (PsFT1) - Pisum sativum (Garden pea)highly similar to ( 761) loc_o…	0	0	0	0	0	0	0	0	0	0
GRMZM2G096268	'10.3'	'cell wall.hemicellulose synthesis'	'moderately similar to ( 439) AT2G03220 | Symbols: FT1, ATFUT1, ATFT1, MUR2 | FT1 (FUCOSYLTRANSFERASE 1); fucosyltransferase/ transferase, transferring glycosyl groups | chr2:970401-972353 REVERSEmoderately similar to ( 431) FUT1_PEA Galactoside 2-alpha-L-fucosyltransferase (EC 2.4.1.69) (Xyloglucan alpha-(1,2)-fucosyltransferase) (PsFT1) - Pisum sativum (Garden pea)highly similar to ( 778) loc_o…	0	0	0	0	0	0	0	0	0	0
GRMZM2G103128	'10.3'	'cell wall.hemicellulose synthesis'	'highly similar to ( 513) AT2G03220 | Symbols: FT1, ATFUT1, ATFT1, MUR2 | FT1 (FUCOSYLTRANSFERASE 1); fucosyltransferase/ transferase, transferring glycosyl groups | chr2:970401-972353 REVERSEhighly similar to ( 518) FUT1_PEA Galactoside 2-alpha-L-fucosyltransferase (EC 2.4.1.69) (Xyloglucan alpha-(1,2)-fucosyltransferase) (PsFT1) - Pisum sativum (Garden pea)highly similar to ( 777) loc_os02g5261…	2.65	1.15	1.35	1.45	1.85	1.3	1.05	0.75	3.25	2
GRMZM2G104032	'10.3'	'cell wall.hemicellulose synthesis'	'moderately similar to ( 356) AT1G14100 | Symbols: FUT8 | FUT8 (FUCOSYLTRANSFERASE 8); galactoside 2-alpha-L-fucosyltransferase | chr1:4827961-4829587 FORWARDmoderately similar to ( 357) FUT1_PEA Galactoside 2-alpha-L-fucosyltransferase (EC 2.4.1.69) (Xyloglucan alpha-(1,2)-fucosyltransferase) (PsFT1) - Pisum sativum (Garden pea)highly similar to ( 606) loc_os08g24750 12008.m06494 protein fucosyl…	0	0	0	0	0	0	0	0	0	0
GRMZM2G118312	'10.3'	'cell wall.hemicellulose synthesis'	'moderately similar to ( 399) AT2G03220 | Symbols: FT1, ATFUT1, ATFT1, MUR2 | FT1 (FUCOSYLTRANSFERASE 1); fucosyltransferase/ transferase, transferring glycosyl groups | chr2:970401-972353 REVERSEmoderately similar to ( 399) FUT1_PEA Galactoside 2-alpha-L-fucosyltransferase (EC 2.4.1.69) (Xyloglucan alpha-(1,2)-fucosyltransferase) (PsFT1) - Pisum sativum (Garden pea)highly similar to ( 553) loc_o…	0.15	0.25	0.35	0.2	0	0	0.05	0.1	0.2	0.1
GRMZM2G127184	'10.3'	'cell wall.hemicellulose synthesis'	'moderately similar to ( 384) AT2G03220 | Symbols: FT1, ATFUT1, ATFT1, MUR2 | FT1 (FUCOSYLTRANSFERASE 1); fucosyltransferase/ transferase, transferring glycosyl groups | chr2:970401-972353 REVERSEmoderately similar to ( 380) FUT1_PEA Galactoside 2-alpha-L-fucosyltransferase (EC 2.4.1.69) (Xyloglucan alpha-(1,2)-fucosyltransferase) (PsFT1) - Pisum sativum (Garden pea)highly similar to ( 617) loc_o…	0.05	0	0.05	0.1	0.1	0.1	0	0	0.05	0.1
GRMZM2G137779	'10.3'	'cell wall.hemicellulose synthesis'	'highly similar to ( 789) AT2G20370 | Symbols: KAM1, MUR3 | MUR3 (MURUS 3); catalytic/ transferase, transferring glycosyl groups | chr2:8792355-8794214 FORWARDhighly similar to ( 914) KATAM_ORYSA Xyloglucan galactosyltransferase KATAMARI1 homolog (EC 2.4.1.-) - Oryza sativa (Rice)highly similar to ( 938) loc_os03g05110 12003.m06035 protein xyloglucan galactosyltransferase KATAMARI 1, putative, ex…	2.6	2.2	3	2.05	1.35	1.5	1.4	2.7	2.7	2.45
GRMZM2G139691	'10.3'	'cell wall.hemicellulose synthesis'	'weakly similar to ( 181) AT5G16890 | Symbols: | exostosin family protein | chr5:5551664-5554741 FORWARDmoderately similar to ( 245) loc_os01g59630 12001.m12098 protein secondary cell wall-related glycosyltransferase family 47, putative, expressed seq=cds; coord=3:187021027..187026350:1; parent_gene=GRMZM2G139691'	12.35	13.35	18.65	11.5	9.3	8	7.6	12.2	12.15	10.9
GRMZM2G164072	'10.3'	'cell wall.hemicellulose synthesis'	'highly similar to ( 662) AT1G26810 | Symbols: GALT1 | GALT1 (GALACTOSYLTRANSFERASE1); UDP-galactose:N-glycan beta-1,3-galactosyltransferase/ transferase, transferring glycosyl groups / transferase, transferring hexosyl groups | chr1:9286862-9289327 REVERSEnearly identical (1068) loc_os06g12390 12006.m091654 protein transferase, transferring glycosyl groups, putative, expressed seq=cds; coord=9:4…	31.05	41.4	24.75	33.4	23.3	22.85	26	22.7	24.95	30.8
GRMZM2G332548	'10.3'	'cell wall.hemicellulose synthesis'	'highly similar to ( 796) AT2G20370 | Symbols: KAM1, MUR3 | MUR3 (MURUS 3); catalytic/ transferase, transferring glycosyl groups | chr2:8792355-8794214 FORWARDhighly similar to ( 908) KATAM_ORYSA Xyloglucan galactosyltransferase KATAMARI1 homolog (EC 2.4.1.-) - Oryza sativa (Rice)highly similar to ( 932) loc_os03g05110 12003.m06035 protein xyloglucan galactosyltransferase KATAMARI 1, putative, ex…	0	0	0	0	0	0	0	0	0	0
GRMZM2G333274	'10.3'	'cell wall.hemicellulose synthesis'	'moderately similar to ( 391) AT2G03220 | Symbols: FT1, ATFUT1, ATFT1, MUR2 | FT1 (FUCOSYLTRANSFERASE 1); fucosyltransferase/ transferase, transferring glycosyl groups | chr2:970401-972353 REVERSEmoderately similar to ( 394) FUT1_PEA Galactoside 2-alpha-L-fucosyltransferase (EC 2.4.1.69) (Xyloglucan alpha-(1,2)-fucosyltransferase) (PsFT1) - Pisum sativum (Garden pea)highly similar to ( 717) loc_o…	0	0	0	0	0	0	0	0	0	0
GRMZM2G333361	'10.3'	'cell wall.hemicellulose synthesis'	'weakly similar to ( 112) AT2G15390 | Symbols: FUT4, atfut4 | FUT4; fucosyltransferase/ transferase, transferring glycosyl groups | chr2:6709345-6711044 REVERSEweakly similar to ( 102) FUT1_PEA Galactoside 2-alpha-L-fucosyltransferase (EC 2.4.1.69) (Xyloglucan alpha-(1,2)-fucosyltransferase) (PsFT1) - Pisum sativum (Garden pea)weakly similar to ( 170) loc_os06g10930 12006.m05810 protein galactosi…	0.55	0.65	0.45	0.65	1.05	0.5	0.7	0.7	1.8	1.2
GRMZM2G386463	'10.3'	'cell wall.hemicellulose synthesis'	'highly similar to ( 583) AT3G19280 | Symbols: FUT11, ATFUT11, FUCT1, FUCTA | FUT11 (FUCOSYLTRANSFERASE 11); 4-galactosyl-N-acetylglucosaminide 3-alpha-L-fucosyltransferase/ fucosyltransferase/ transferase, transferring glycosyl groups | chr3:6681409-6683801 REVERSEhighly similar to ( 822) loc_os08g36840 12008.m26710 protein glycoprotein 3-alpha-L-fucosyltransferase A, putative, expressed seq=cds…	10.05	9.45	11.8	8.1	9.9	9.35	10.6	15.1	14.35	14.7
GRMZM2G387087	'10.3'	'cell wall.hemicellulose synthesis'	'moderately similar to ( 388) AT1G14100 | Symbols: FUT8 | FUT8 (FUCOSYLTRANSFERASE 8); galactoside 2-alpha-L-fucosyltransferase | chr1:4827961-4829587 FORWARDmoderately similar to ( 389) FUT1_PEA Galactoside 2-alpha-L-fucosyltransferase (EC 2.4.1.69) (Xyloglucan alpha-(1,2)-fucosyltransferase) (PsFT1) - Pisum sativum (Garden pea)highly similar to ( 568) loc_os08g24750 12008.m06494 protein fucosyl…	0	0	0	0	0	0	0	0.25	0	0
GRMZM2G404762	'10.3'	'cell wall.hemicellulose synthesis'	'highly similar to ( 585) AT2G03220 | Symbols: FT1, ATFUT1, ATFT1, MUR2 | FT1 (FUCOSYLTRANSFERASE 1); fucosyltransferase/ transferase, transferring glycosyl groups | chr2:970401-972353 REVERSEhighly similar to ( 622) FUT1_PEA Galactoside 2-alpha-L-fucosyltransferase (EC 2.4.1.69) (Xyloglucan alpha-(1,2)-fucosyltransferase) (PsFT1) - Pisum sativum (Garden pea)highly similar to ( 653) loc_os02g5264…	0	0.35	0.65	0.1	0.15	0.05	0.1	0.25	0.05	10.45
GRMZM2G430995	'10.3'	'cell wall.hemicellulose synthesis'	'highly similar to ( 796) AT2G20370 | Symbols: KAM1, MUR3 | MUR3 (MURUS 3); catalytic/ transferase, transferring glycosyl groups | chr2:8792355-8794214 FORWARDhighly similar to ( 908) KATAM_ORYSA Xyloglucan galactosyltransferase KATAMARI1 homolog (EC 2.4.1.-) - Oryza sativa (Rice)highly similar to ( 932) loc_os03g05110 12003.m06035 protein xyloglucan galactosyltransferase KATAMARI 1, putative, ex…	0	0	0	0	0	0	0	0	0	0
GRMZM2G436950	'10.3'	'cell wall.hemicellulose synthesis'	'highly similar to ( 504) AT2G03220 | Symbols: FT1, ATFUT1, ATFT1, MUR2 | FT1 (FUCOSYLTRANSFERASE 1); fucosyltransferase/ transferase, transferring glycosyl groups | chr2:970401-972353 REVERSEhighly similar to ( 519) FUT1_PEA Galactoside 2-alpha-L-fucosyltransferase (EC 2.4.1.69) (Xyloglucan alpha-(1,2)-fucosyltransferase) (PsFT1) - Pisum sativum (Garden pea)highly similar to ( 751) loc_os06g1097…	0	0.1	0	0	0	0	0	0	0	0
GRMZM2G470010	'10.3'	'cell wall.hemicellulose synthesis'	'moderately similar to ( 384) AT1G14100 | Symbols: FUT8 | FUT8 (FUCOSYLTRANSFERASE 8); galactoside 2-alpha-L-fucosyltransferase | chr1:4827961-4829587 FORWARDmoderately similar to ( 382) FUT1_PEA Galactoside 2-alpha-L-fucosyltransferase (EC 2.4.1.69) (Xyloglucan alpha-(1,2)-fucosyltransferase) (PsFT1) - Pisum sativum (Garden pea)highly similar to ( 691) loc_os08g24750 12008.m06494 protein fucosyl…	0	0	0	0	0	0	0	0	0	0
GRMZM2G471594	'10.3'	'cell wall.hemicellulose synthesis'	'highly similar to ( 503) AT2G03220 | Symbols: FT1, ATFUT1, ATFT1, MUR2 | FT1 (FUCOSYLTRANSFERASE 1); fucosyltransferase/ transferase, transferring glycosyl groups | chr2:970401-972353 REVERSEhighly similar to ( 513) FUT1_PEA Galactoside 2-alpha-L-fucosyltransferase (EC 2.4.1.69) (Xyloglucan alpha-(1,2)-fucosyltransferase) (PsFT1) - Pisum sativum (Garden pea)highly similar to ( 697) loc_os02g5263…	0	0	0	0	0	0	0	0	0.05	0
GRMZM2G703790	'10.3'	'cell wall.hemicellulose synthesis'	'weakly similar to ( 107) AT1G14110 | Symbols: FUT9, ATFUT9 | FUT9 (FUCOSYLTRANSFERASE 9); fucosyltransferase | chr1:4830297-4831915 FORWARDweakly similar to ( 109) FUT1_PEA Galactoside 2-alpha-L-fucosyltransferase (EC 2.4.1.69) (Xyloglucan alpha-(1,2)-fucosyltransferase) (PsFT1) - Pisum sativum (Garden pea)weakly similar to ( 146) loc_os06g10920 12006.m05809 protein fucosyltransferase 8, putativ…	0	0	0	0	0	0	0	0	0	0
GRMZM5G806735	'10.3'	'cell wall.hemicellulose synthesis'	'moderately similar to ( 452) AT2G03220 | Symbols: FT1, ATFUT1, ATFT1, MUR2 | FT1 (FUCOSYLTRANSFERASE 1); fucosyltransferase/ transferase, transferring glycosyl groups | chr2:970401-972353 REVERSEmoderately similar to ( 439) FUT1_PEA Galactoside 2-alpha-L-fucosyltransferase (EC 2.4.1.69) (Xyloglucan alpha-(1,2)-fucosyltransferase) (PsFT1) - Pisum sativum (Garden pea)highly similar to ( 664) loc_o…	0	0	0	0	0	0	0	0	0	0
GRMZM5G816155	'10.3'	'cell wall.hemicellulose synthesis'	'moderately similar to ( 471) AT2G20370 | Symbols: KAM1, MUR3 | MUR3 (MURUS 3); catalytic/ transferase, transferring glycosyl groups | chr2:8792355-8794214 FORWARDmoderately similar to ( 497) KATAM_ORYSA Xyloglucan galactosyltransferase KATAMARI1 homolog (EC 2.4.1.-) - Oryza sativa (Rice)highly similar to ( 689) loc_os03g05070 12003.m06031 protein xyloglucan galactosyltransferase KATAMARI 1, puta…	0	0	0	0	0	0	0	0	0	0
GRMZM5G817350	'10.3'	'cell wall.hemicellulose synthesis'	'weakly similar to ( 102) loc_os12g07290 12012.m26850 protein alpha-(1,4)-fucosyltransferase, putative, expressed seq=cds; coord=7:138690479..138692964:-1; parent_gene=GRMZM5G817350'	0	0	0	0	0	0	0	0	0	0
GRMZM5G857459	'10.3'	'cell wall.hemicellulose synthesis'	'moderately similar to ( 445) AT2G03210 | Symbols: FUT2, ATFUT2 | FUT2 (FUCOSYLTRANSFERASE 2); fucosyltransferase/ transferase, transferring glycosyl groups | chr2:968335-970018 REVERSEmoderately similar to ( 456) FUT1_PEA Galactoside 2-alpha-L-fucosyltransferase (EC 2.4.1.69) (Xyloglucan alpha-(1,2)-fucosyltransferase) (PsFT1) - Pisum sativum (Garden pea)highly similar to ( 702) loc_os06g10930 1…	0	0	0	0	0	0	0	0	0	0
GRMZM5G858456	'10.3'	'cell wall.hemicellulose synthesis'	'moderately similar to ( 394) AT2G03220 | Symbols: FT1, ATFUT1, ATFT1, MUR2 | FT1 (FUCOSYLTRANSFERASE 1); fucosyltransferase/ transferase, transferring glycosyl groups | chr2:970401-972353 REVERSEmoderately similar to ( 390) FUT1_PEA Galactoside 2-alpha-L-fucosyltransferase (EC 2.4.1.69) (Xyloglucan alpha-(1,2)-fucosyltransferase) (PsFT1) - Pisum sativum (Garden pea)highly similar to ( 600) loc_o…	0.3	0	1.25	0	2.55	1.05	0.2	0	0.05	0
GRMZM5G870571	'10.3'	'cell wall.hemicellulose synthesis'	'highly similar to ( 507) AT2G03220 | Symbols: FT1, ATFUT1, ATFT1, MUR2 | FT1 (FUCOSYLTRANSFERASE 1); fucosyltransferase/ transferase, transferring glycosyl groups | chr2:970401-972353 REVERSEmoderately similar to ( 496) FUT1_PEA Galactoside 2-alpha-L-fucosyltransferase (EC 2.4.1.69) (Xyloglucan alpha-(1,2)-fucosyltransferase) (PsFT1) - Pisum sativum (Garden pea)highly similar to ( 723) loc_os06g…	0	0	0	0	0	0	0	0	0	0
GRMZM5G875445	'10.3'	'cell wall.hemicellulose synthesis'	'moderately similar to ( 489) AT2G03220 | Symbols: FT1, ATFUT1, ATFT1, MUR2 | FT1 (FUCOSYLTRANSFERASE 1); fucosyltransferase/ transferase, transferring glycosyl groups | chr2:970401-972353 REVERSEmoderately similar to ( 486) FUT1_PEA Galactoside 2-alpha-L-fucosyltransferase (EC 2.4.1.69) (Xyloglucan alpha-(1,2)-fucosyltransferase) (PsFT1) - Pisum sativum (Garden pea)highly similar to ( 723) loc_o…	0	0	0	0	0	0	0	0	0	0
GRMZM2G002023	'10.3.2'	'cell wall.hemicellulose synthesis.glucuronoxylan'	'highly similar to ( 770) AT3G18660 | Symbols: PGSIP1 | PGSIP1 (PLANT GLYCOGENIN-LIKE STARCH INITIATION PROTEIN 1); transferase, transferring glycosyl groups | chr3:6419211-6421959 REVERSEnearly identical (1139) loc_os01g65780 12001.m150444 protein secondary cell wall-related glycosyltransferase family 8, putative, expressed seq=cds; coord=8:165234282..165239619:-1; parent_gene=GRMZM2G002023'	42.2	24.75	44.4	39.25	45.9	33.9	27.65	45	49.2	37.15
GRMZM2G035377	'10.3.2'	'cell wall.hemicellulose synthesis.glucuronoxylan'	'moderately similar to ( 421) AT5G22940 | Symbols: F8H | F8H (FRA8 HOMOLOG); catalytic | chr5:7677197-7678892 FORWARDhighly similar to ( 582) loc_os03g01760 12003.m05720 protein transferase, putative, expressed seq=cds; coord=1:2657650..2660198:1; parent_gene=GRMZM2G035377'	7	7.05	8.2	6.3	7.75	6.75	7.55	7.65	8.25	10.25
GRMZM2G058472	'10.3.2'	'cell wall.hemicellulose synthesis.glucuronoxylan'	'highly similar to ( 719) AT3G18660 | Symbols: PGSIP1 | PGSIP1 (PLANT GLYCOGENIN-LIKE STARCH INITIATION PROTEIN 1); transferase, transferring glycosyl groups | chr3:6419211-6421959 REVERSEnearly identical (1031) loc_os05g35200 12005.m27835 protein secondary cell wall-related glycosyltransferase family 8, putative, expressed seq=cds; coord=6:147970989..147975725:-1; parent_gene=GRMZM2G058472'	0.35	0.3	2.25	0.2	0.65	0.4	0.65	1.3	0.3	1.55
GRMZM2G109431	'10.3.2'	'cell wall.hemicellulose synthesis.glucuronoxylan'	'highly similar to ( 587) AT4G33330 | Symbols: PGSIP3 | transferase, transferring glycosyl groups | chr4:16059754-16063061 REVERSEhighly similar to ( 924) loc_os03g08600 12003.m34803 protein transferase, transferring glycosyl groups, putative, expressed seq=cds; coord=1:17694593..17698633:1; parent_gene=GRMZM2G109431'	0	0	0.15	0.05	0.1	0.05	0	0	0.05	0.55
GRMZM2G113245	'10.3.2'	'cell wall.hemicellulose synthesis.glucuronoxylan'	'moderately similar to ( 417) AT5G22940 | Symbols: F8H | F8H (FRA8 HOMOLOG); catalytic | chr5:7677197-7678892 FORWARDhighly similar to ( 584) loc_os03g01760 12003.m05720 protein transferase, putative, expressed seq=cds; coord=9:154779654..154782133:1; parent_gene=GRMZM2G113245'	4.95	3.5	3.65	5.05	3.15	2.8	3.05	2.95	4.6	4.4
GRMZM2G135743	'10.3.2'	'cell wall.hemicellulose synthesis.glucuronoxylan'	'highly similar to ( 751) AT3G18660 | Symbols: PGSIP1 | PGSIP1 (PLANT GLYCOGENIN-LIKE STARCH INITIATION PROTEIN 1); transferase, transferring glycosyl groups | chr3:6419211-6421959 REVERSEnearly identical (1129) loc_os01g65780 12001.m150444 protein secondary cell wall-related glycosyltransferase family 8, putative, expressed seq=cds; coord=3:172050264..172056163:-1; parent_gene=GRMZM2G135743'	13.95	10.55	14.7	12.3	13.4	12.65	13.9	18.65	12.1	31.55
GRMZM2G365544	'10.3.2'	'cell wall.hemicellulose synthesis.glucuronoxylan'	'highly similar to ( 562) AT3G18660 | Symbols: PGSIP1 | PGSIP1 (PLANT GLYCOGENIN-LIKE STARCH INITIATION PROTEIN 1); transferase, transferring glycosyl groups | chr3:6419211-6421959 REVERSEhighly similar to ( 865) loc_os01g65780 12001.m150444 protein secondary cell wall-related glycosyltransferase family 8, putative, expressed seq=cds; coord=1:26765246..26770266:-1; parent_gene=GRMZM2G365544'	0	0	0	0	0	0	0	0	0	0
GRMZM2G441987	'10.3.2'	'cell wall.hemicellulose synthesis.glucuronoxylan'	'highly similar to ( 514) AT3G18660 | Symbols: PGSIP1 | PGSIP1 (PLANT GLYCOGENIN-LIKE STARCH INITIATION PROTEIN 1); transferase, transferring glycosyl groups | chr3:6419211-6421959 REVERSEhighly similar to ( 559) loc_os05g35200 12005.m27835 protein secondary cell wall-related glycosyltransferase family 8, putative, expressed seq=cds; coord=3:178267787..178270375:1; parent_gene=GRMZM2G441987'	0	0	0	0	0	0	0	0	0	0.1
GRMZM2G130046	'10.4'	'cell wall.pectin synthesis'	'highly similar to ( 649) AT3G25140 | Symbols: GAUT8, QUA1 | QUA1 (QUASIMODO 1); polygalacturonate 4-alpha-galacturonosyltransferase/ transferase, transferring glycosyl groups / transferase, transferring hexosyl groups | chr3:9154748-9156642 FORWARDhighly similar to ( 779) loc_os02g29530 12002.m08096 protein transferase, transferring glycosyl groups, putative, expressed seq=cds; coord=5:162680558…	38.85	52.85	61.65	29.4	31.45	26.75	27.65	39.75	33.05	32.8
GRMZM2G085042	'10.4.3.6'	'cell wall.pectin synthesis.rhamnogalacturonan II.Xylose Transferase with Fucose Acceptor'	'moderately similar to ( 459) AT4G01220 | Symbols: | FUNCTIONS IN: molecular_function unknown; INVOLVED IN: biological_process unknown; LOCATED IN: endoplasmic reticulum; EXPRESSED IN: 22 plant structures; EXPRESSED DURING: 13 growth stages; CONTAINS InterPro DOMAIN/s: Reticulon (InterPro:IPR003388); BEST Arabidopsis thaliana protein match is: RGXT1 (rhamnogalacturonan xylosyltransferase 1); UDP-…	22.1	29.55	19.55	16.9	18.8	13.8	12.2	9.95	15.3	16.65
GRMZM2G128616	'10.4.3.6'	'cell wall.pectin synthesis.rhamnogalacturonan II.Xylose Transferase with Fucose Acceptor'	'very weakly similar to (91.3) AT4G01220 | Symbols: | FUNCTIONS IN: molecular_function unknown; INVOLVED IN: biological_process unknown; LOCATED IN: endoplasmic reticulum; EXPRESSED IN: 22 plant structures; EXPRESSED DURING: 13 growth stages; CONTAINS InterPro DOMAIN/s: Reticulon (InterPro:IPR003388); BEST Arabidopsis thaliana protein match is: RGXT1 (rhamnogalacturonan xylosyltransferase 1); UDP…	0	0	0	0	0	0	0	0	0	0
AC185300.4_FG002	'10.5'	'cell wall.cell wall proteins'	'moderately similar to ( 255) AT3G58800 | Symbols: | unknown protein | chr3:21748562-21749596 FORWARDmoderately similar to ( 451) loc_os02g13650 12002.m100152 protein expressed protein seq=cds; coord=4:228011331..228012407:-1; parent_gene=AC185300.4_FG002'	1.1	0.8	0.85	0.9	1.75	1.65	1.55	0.6	1.3	1.35
GRMZM2G003493	'10.5'	'cell wall.cell wall proteins'	'moderately similar to ( 439) AT3G48530 | Symbols: KING1 | KING1 (SNF1-RELATED PROTEIN KINASE REGULATORY SUBUNIT GAMMA 1) | chr3:17987559-17989592 FORWARDhighly similar to ( 671) loc_os01g69240 12001.m13024 protein AKIN gamma, putative, expressed seq=cds; coord=8:161621236..161623147:1; parent_gene=GRMZM2G003493'	0.45	0.6	0.8	0.3	1	0.5	0.3	0.2	0.55	2.35
GRMZM2G010804	'10.5'	'cell wall.cell wall proteins'	'moderately similar to ( 243) AT3G58800 | Symbols: | unknown protein | chr3:21748562-21749596 FORWARDmoderately similar to ( 419) loc_os01g54440 12001.m11608 protein expressed protein seq=cds; coord=3:197415755..197417721:-1; parent_gene=GRMZM2G010804'	4.95	4.35	3.15	4.4	2.85	2.7	3	3.4	4.25	3.1
GRMZM2G022224	'10.5'	'cell wall.cell wall proteins'	'weakly similar to ( 133) AT3G48530 | Symbols: KING1 | KING1 (SNF1-RELATED PROTEIN KINASE REGULATORY SUBUNIT GAMMA 1) | chr3:17987559-17989592 FORWARDmoderately similar to ( 209) loc_os01g69240 12001.m13024 protein AKIN gamma, putative, expressed seq=cds; coord=3:159909736..159940141:1; parent_gene=GRMZM2G022224'	47.25	53.3	47.65	49.65	36.05	43.35	42.9	55.15	43.95	41.1
GRMZM2G173536	'10.5'	'cell wall.cell wall proteins'	'moderately similar to ( 464) AT3G48530 | Symbols: KING1 | KING1 (SNF1-RELATED PROTEIN KINASE REGULATORY SUBUNIT GAMMA 1) | chr3:17987559-17989592 FORWARDhighly similar to ( 688) loc_os04g31340 12004.m08236 protein AKIN gamma, putative, expressed seq=cds; coord=2:73070103..73075653:1; parent_gene=GRMZM2G173536'	51.4	25.9	58.8	41.4	20.6	25	22.75	38.95	32.65	24.9
AC184130.4_FG005	'10.5.1.1'	'cell wall.cell wall proteins.AGPs.AGP'	'weakly similar to ( 117) loc_os06g44660 12006.m08993 protein fasciclin-like arabinogalactan protein 8 precursor, putative, expressed seq=cds; coord=4:235295762..235296655:-1; parent_gene=AC184130.4_FG005'	0	0	0	0	0	0	0	0	0	0
AC213621.5_FG004	'10.5.1.1'	'cell wall.cell wall proteins.AGPs.AGP'	'moderately similar to ( 325) AT3G46550 | Symbols: SOS5 | SOS5 (salt overly sensitive 5); polysaccharide binding / protein binding | chr3:17136612-17137874 REVERSEhighly similar to ( 560) loc_os05g38500 12005.m08029 protein fasciclin-like arabinogalactan protein 8 precursor, putative seq=cds; coord=6:151580017..151581309:1; parent_gene=AC213621.5_FG004'	0.6	0.7	0.65	0.7	0.15	0.3	0.2	0.25	0.2	0.35
AC234156.1_FG005	'10.5.1.1'	'cell wall.cell wall proteins.AGPs.AGP'	'weakly similar to ( 184) AT2G04780 | Symbols: FLA7 | FLA7 (FASCICLIN-LIKE ARABINOOGALACTAN 7) | chr2:1677488-1678252 FORWARDmoderately similar to ( 218) loc_os09g30486 12009.m06208 protein fasciclin-like arabinogalactan protein 7 precursor, putative, expressed seq=cds; coord=4:198559982..198560791:-1; parent_gene=AC234156.1_FG005'	4.4	1.45	3.65	4.6	4.5	4.55	4	2.5	3.35	6.15
GRMZM2G001514	'10.5.1.1'	'cell wall.cell wall proteins.AGPs.AGP'	'weakly similar to ( 102) AT5G44130 | Symbols: FLA13 | FLA13 (FASCICLIN-LIKE ARABINOGALACTAN PROTEIN 13 PRECURSOR) | chr5:17761128-17761871 FORWARDweakly similar to ( 189) loc_os05g48900 12005.m08961 protein fasciclin-like arabinogalactan protein 7 precursor, putative, expressed seq=cds; coord=8:69592559..69594672:1; parent_gene=GRMZM2G001514'	0.5	1.5	7.65	2.1	1.4	0.65	2.5	4.05	0.75	10.7
GRMZM2G003165	'10.5.1.1'	'cell wall.cell wall proteins.AGPs.AGP'	'moderately similar to ( 261) AT4G12730 | Symbols: FLA2 | FLA2 (FASCICLIN-LIKE ARABINOGALACTAN 2) | chr4:7491598-7492809 REVERSEmoderately similar to ( 446) loc_os09g07350 12009.m04004 protein fasciclin-like arabinogalactan protein 8 precursor, putative, expressed seq=cds; coord=7:80807680..80810972:1; parent_gene=GRMZM2G003165'	0	0	0	0	0	0	0	0	0	0
GRMZM2G003752	'10.5.1.1'	'cell wall.cell wall proteins.AGPs.AGP'	'moderately similar to ( 347) AT3G60900 | Symbols: FLA10 | FLA10 | chr3:22499573-22500841 REVERSEmoderately similar to ( 469) loc_os04g48490 12004.m09785 protein fasciclin-like arabinogalactan protein 10 precursor, putative, expressed seq=cds; coord=2:16219232..16221297:1; parent_gene=GRMZM2G003752'	204.1	154.35	143.6	245.4	180.2	290	386.85	219.45	288.75	265.85
GRMZM2G003917	'10.5.1.1'	'cell wall.cell wall proteins.AGPs.AGP'	'weakly similar to ( 159) AT2G04780 | Symbols: FLA7 | FLA7 (FASCICLIN-LIKE ARABINOOGALACTAN 7) | chr2:1677488-1678252 FORWARDweakly similar to ( 199) loc_os04g39590 12004.m08947 protein fasciclin-like arabinogalactan protein 7 precursor, putative seq=cds; coord=10:124758844..124759864:1; parent_gene=GRMZM2G003917'	0	0	0	0	0	0	0	0	0	0
GRMZM2G021794	'10.5.1.1'	'cell wall.cell wall proteins.AGPs.AGP'	'weakly similar to ( 102) AT2G20520 | Symbols: FLA6 | FLA6 (FASCICLIN-LIKE ARABINOGALACTAN 6) | chr2:8840663-8841406 FORWARDweakly similar to ( 184) loc_os05g48900 12005.m08961 protein fasciclin-like arabinogalactan protein 7 precursor, putative, expressed seq=cds; coord=6:164551086..164552313:1; parent_gene=GRMZM2G021794'	1.7	1.4	7.45	1.45	1.45	1.05	1.15	3.45	0.4	3
GRMZM2G022931	'10.5.1.1'	'cell wall.cell wall proteins.AGPs.AGP'	'weakly similar to ( 176) AT5G03170 | Symbols: FLA11 | FLA11 | chr5:752898-753638 REVERSEmoderately similar to ( 266) loc_os01g47780 12001.m10971 protein fasciclin-like arabinogalactan protein 7 precursor, putative, expressed seq=cds; coord=3:210506972..210508715:1; parent_gene=GRMZM2G022931'	1.75	1.5	4.25	1.45	0.95	0.45	0.7	1	1.25	2.35
GRMZM2G025240	'10.5.1.1'	'cell wall.cell wall proteins.AGPs.AGP'	'very weakly similar to (91.7) loc_os01g47780 12001.m10971 protein fasciclin-like arabinogalactan protein 7 precursor, putative, expressed seq=cds; coord=8:69589821..69590301:1; parent_gene=GRMZM2G025240'	0	0	0	0	0.05	0	0	0	0	0
GRMZM2G027825	'10.5.1.1'	'cell wall.cell wall proteins.AGPs.AGP'	'moderately similar to ( 490) AT2G35860 | Symbols: FLA16 | FLA16 (FASCICLIN-LIKE ARABINOGALACTAN PROTEIN 16 PRECURSOR) | chr2:15059859-15061810 FORWARDhighly similar to ( 627) loc_os03g57460 12003.m10664 protein fasciclin domain, putative, expressed seq=cds; coord=5:4664985..4668821:1; parent_gene=GRMZM2G027825'	26.95	20.5	18.8	30.2	19.5	18.2	21.1	15	15.1	31.5
GRMZM2G035933	'10.5.1.1'	'cell wall.cell wall proteins.AGPs.AGP'	'moderately similar to ( 347) AT3G46550 | Symbols: SOS5 | SOS5 (salt overly sensitive 5); polysaccharide binding / protein binding | chr3:17136612-17137874 REVERSEhighly similar to ( 592) loc_os01g62380 12001.m150773 protein fasciclin-like arabinogalactan protein 8 precursor, putative, expressed seq=cds; coord=8:168934271..168935965:1; parent_gene=GRMZM2G035933'	3.2	2.9	4.55	4.05	3.75	3.8	2.8	5.7	3.35	6.15
GRMZM2G051185	'10.5.1.1'	'cell wall.cell wall proteins.AGPs.AGP'	'weakly similar to ( 143) AT2G20520 | Symbols: FLA6 | FLA6 (FASCICLIN-LIKE ARABINOGALACTAN 6) | chr2:8840663-8841406 FORWARDmoderately similar to ( 209) loc_os02g20540 12002.m07296 protein fasciclin-like arabinogalactan protein 8 precursor, putative, expressed seq=cds; coord=4:219992405..219994767:-1; parent_gene=GRMZM2G051185'	0	0	0	0	0	0	0	0	0	0
GRMZM2G065718	'10.5.1.1'	'cell wall.cell wall proteins.AGPs.AGP'	'moderately similar to ( 245) AT3G60900 | Symbols: FLA10 | FLA10 | chr3:22499573-22500841 REVERSEmoderately similar to ( 342) loc_os03g03600 12003.m05893 protein fasciclin-like arabinogalactan protein 8 precursor, putative, expressed seq=cds; coord=1:5952987..5954672:1; parent_gene=GRMZM2G065718'	5.8	2.9	8.75	7.75	8.3	6.8	9.15	15	2.75	10.75
GRMZM2G081017	'10.5.1.1'	'cell wall.cell wall proteins.AGPs.AGP'	'weakly similar to ( 194) AT2G04780 | Symbols: FLA7 | FLA7 (FASCICLIN-LIKE ARABINOOGALACTAN 7) | chr2:1677488-1678252 FORWARDmoderately similar to ( 267) loc_os09g30486 12009.m06208 protein fasciclin-like arabinogalactan protein 7 precursor, putative, expressed seq=cds; coord=2:189488589..189490512:-1; parent_gene=GRMZM2G081017'	0	0	0.15	0	0	0	0	0	0	0
GRMZM2G082517	'10.5.1.1'	'cell wall.cell wall proteins.AGPs.AGP'	'weakly similar to ( 199) loc_os02g26290 12002.m07773 protein fasciclin-like arabinogalactan protein 8 precursor, putative, expressed seq=cds; coord=5:126773571..126774617:1; parent_gene=GRMZM2G082517'	0	0	0	0	0	0	0	0	0	0
GRMZM2G084812	'10.5.1.1'	'cell wall.cell wall proteins.AGPs.AGP'	'weakly similar to ( 151) AT5G55730 | Symbols: FLA1 | FLA1 (FASCICLIN-LIKE ARAB INOGALACTAN 1) | chr5:22558375-22560392 REVERSEmoderately similar to ( 267) loc_os08g23180 12008.m06339 protein fasciclin-like arabinogalactan protein 8 precursor, putative, expressed seq=cds; coord=6:124803945..124805261:1; parent_gene=GRMZM2G084812'	27.85	18.2	59.85	39.45	58.35	56.95	92.8	50.55	41	142.95
GRMZM2G109291	'10.5.1.1'	'cell wall.cell wall proteins.AGPs.AGP'	'weakly similar to ( 152) AT3G12660 | Symbols: FLA14 | FLA14 (FASCICLIN-LIKE ARABINOGALACTAN PROTEIN 14 PRECURSOR) | chr3:4019060-4019827 FORWARDmoderately similar to ( 254) loc_os02g26320 12002.m07776 protein fasciclin-like arabinogalactan protein 10 precursor, putative, expressed seq=cds; coord=5:126696124..126697616:-1; parent_gene=GRMZM2G109291'	0	0	0	0	0	0	0	0	0	0
GRMZM2G133053	'10.5.1.1'	'cell wall.cell wall proteins.AGPs.AGP'	'weakly similar to ( 154) AT5G55730 | Symbols: FLA1 | FLA1 (FASCICLIN-LIKE ARAB INOGALACTAN 1) | chr5:22558375-22560392 REVERSEmoderately similar to ( 230) loc_os09g30010 12009.m06152 protein fasciclin-like arabinogalactan protein 8 precursor, putative, expressed seq=cds; coord=7:130426898..130428254:1; parent_gene=GRMZM2G133053'	55.9	45.9	95.55	64.4	73.5	49.05	62.75	48.25	140.65	708.9
GRMZM2G134528	'10.5.1.1'	'cell wall.cell wall proteins.AGPs.AGP'	'weakly similar to ( 119) loc_os06g44660 12006.m08993 protein fasciclin-like arabinogalactan protein 8 precursor, putative, expressed seq=cds; coord=5:89287541..89288511:1; parent_gene=GRMZM2G134528'	0	0	0	0	0	0	0	0	0	0
GRMZM2G144610	'10.5.1.1'	'cell wall.cell wall proteins.AGPs.AGP'	'moderately similar to ( 201) AT4G12730 | Symbols: FLA2 | FLA2 (FASCICLIN-LIKE ARABINOGALACTAN 2) | chr4:7491598-7492809 REVERSEweakly similar to ( 199) loc_os09g07350 12009.m04004 protein fasciclin-like arabinogalactan protein 8 precursor, putative, expressed seq=cds; coord=9:36545543..36547162:1; parent_gene=GRMZM2G144610'	0.4	1.25	0.05	0.4	0	0	0	0	0	0
GRMZM2G148534	'10.5.1.1'	'cell wall.cell wall proteins.AGPs.AGP'	'weakly similar to ( 166) AT4G12730 | Symbols: FLA2 | FLA2 (FASCICLIN-LIKE ARABINOGALACTAN 2) | chr4:7491598-7492809 REVERSEmoderately similar to ( 206) loc_os02g49420 12002.m09976 protein fasciclin-like arabinogalactan protein 10 precursor, putative, expressed seq=cds; coord=4:164170845..164172340:-1; parent_gene=GRMZM2G148534'	0.1	0.45	1	0.5	0.55	0	0.1	0.6	0.15	9.1
GRMZM2G174799	'10.5.1.1'	'cell wall.cell wall proteins.AGPs.AGP'	'weakly similar to ( 194) AT2G04780 | Symbols: FLA7 | FLA7 (FASCICLIN-LIKE ARABINOOGALACTAN 7) | chr2:1677488-1678252 FORWARDmoderately similar to ( 280) loc_os09g30486 12009.m06208 protein fasciclin-like arabinogalactan protein 7 precursor, putative, expressed seq=cds; coord=7:132080811..132082900:-1; parent_gene=GRMZM2G174799'	0.15	0.25	1.15	2.15	1.8	0	0.2	0.3	0.05	18.5
GRMZM2G177142	'10.5.1.1'	'cell wall.cell wall proteins.AGPs.AGP'	'weakly similar to ( 109) AT3G60900 | Symbols: FLA10 | FLA10 | chr3:22499573-22500841 REVERSEmoderately similar to ( 208) loc_os06g44660 12006.m08993 protein fasciclin-like arabinogalactan protein 8 precursor, putative, expressed seq=cds; coord=6:95322719..95323771:1; parent_gene=GRMZM2G177142'	0	0	0	0	0	0	0	0	0	0
GRMZM2G177242	'10.5.1.1'	'cell wall.cell wall proteins.AGPs.AGP'	'weakly similar to ( 168) AT5G03170 | Symbols: FLA11 | FLA11 | chr5:752898-753638 REVERSEmoderately similar to ( 214) loc_os01g06580 12001.m07288 protein fasciclin-like arabinogalactan protein 7 precursor, putative, expressed seq=cds; coord=3:15061320..15062756:1; parent_gene=GRMZM2G177242'	0.2	0.2	0.8	0.75	1.1	0	0	0	0	5.4
GRMZM2G301908	'10.5.1.1'	'cell wall.cell wall proteins.AGPs.AGP'	'weakly similar to ( 146) AT5G55730 | Symbols: FLA1 | FLA1 (FASCICLIN-LIKE ARAB INOGALACTAN 1) | chr5:22558375-22560392 REVERSEmoderately similar to ( 236) loc_os08g38270 12008.m07812 protein fasciclin-like arabinogalactan protein 10 precursor, putative, expressed seq=cds; coord=4:197674970..197676500:1; parent_gene=GRMZM2G301908'	8.4	11.75	20.55	10.6	5.2	3.75	11.3	14.8	3.85	12.25
GRMZM2G329181	'10.5.1.1'	'cell wall.cell wall proteins.AGPs.AGP'	'moderately similar to ( 322) AT2G35860 | Symbols: FLA16 | FLA16 (FASCICLIN-LIKE ARABINOGALACTAN PROTEIN 16 PRECURSOR) | chr2:15059859-15061810 FORWARDmoderately similar to ( 402) loc_os03g57460 12003.m10664 protein fasciclin domain, putative, expressed seq=cds; coord=1:285978669..285981839:-1; parent_gene=GRMZM2G329181'	12.15	7.15	14.7	14.55	13.5	15.15	24.3	18.05	11.8	19.4
GRMZM2G341698	'10.5.1.1'	'cell wall.cell wall proteins.AGPs.AGP'	'weakly similar to ( 107) AT3G12660 | Symbols: FLA14 | FLA14 (FASCICLIN-LIKE ARABINOGALACTAN PROTEIN 14 PRECURSOR) | chr3:4019060-4019827 FORWARDmoderately similar to ( 228) loc_os06g44660 12006.m08993 protein fasciclin-like arabinogalactan protein 8 precursor, putative, expressed seq=cds; coord=9:107735076..107736356:1; parent_gene=GRMZM2G341698'	0	0	0	0	0	0	0	0	0.05	0
GRMZM2G403276	'10.5.1.1'	'cell wall.cell wall proteins.AGPs.AGP'	'weakly similar to ( 154) AT5G55730 | Symbols: FLA1 | FLA1 (FASCICLIN-LIKE ARAB INOGALACTAN 1) | chr5:22558375-22560392 REVERSEmoderately similar to ( 231) loc_os09g30010 12009.m06152 protein fasciclin-like arabinogalactan protein 8 precursor, putative, expressed seq=cds; coord=2:188652134..188653299:1; parent_gene=GRMZM2G403276'	1.05	3.15	7.1	4	5.2	4.15	6.85	5.8	3.65	95.6
GRMZM2G421415	'10.5.1.1'	'cell wall.cell wall proteins.AGPs.AGP'	'moderately similar to ( 332) AT3G46550 | Symbols: SOS5 | SOS5 (salt overly sensitive 5); polysaccharide binding / protein binding | chr3:17136612-17137874 REVERSEhighly similar to ( 536) loc_os05g38500 12005.m08029 protein fasciclin-like arabinogalactan protein 8 precursor, putative seq=cds; coord=8:116485135..116486871:1; parent_gene=GRMZM2G421415'	19.3	16.5	17.6	23.75	10.6	9.5	14.65	12.4	16.05	15.6
GRMZM2G003909	'10.5.2'	'cell wall.cell wall proteins.proline rich proteins'	'weakly similar to ( 175) loc_os10g05750 12010.m03978 protein proline-rich protein, putative, expressed seq=cds; coord=1:119412480..119413875:1; parent_gene=GRMZM2G003909'	0	0	0	0	0	0	0	0	0	0.05
GRMZM2G009465	'10.5.2'	'cell wall.cell wall proteins.proline rich proteins'	'weakly similar to ( 192) loc_os10g05980 12010.m03998 protein proline-rich protein, putative, expressed seq=cds; coord=1:120192918..120195211:1; parent_gene=GRMZM2G009465'	0	0	0	0	0	0	0	0	0	0
GRMZM2G104610	'10.5.2'	'cell wall.cell wall proteins.proline rich proteins'	'moderately similar to ( 211) loc_os03g14130 12003.m06856 protein proline-rich protein, putative, expressed seq=cds; coord=9:142948844..142950188:1; parent_gene=GRMZM2G104610'	0.05	0	0	0.15	0	0	0.05	0.1	0	0.1
GRMZM2G104616	'10.5.2'	'cell wall.cell wall proteins.proline rich proteins'	'weakly similar to ( 124) loc_os03g14140 12003.m06857 protein proline-rich protein, putative, expressed seq=cds; coord=9:142945256..142946552:1; parent_gene=GRMZM2G104616'	0	0	0	0	0	0	0	0	0	0
GRMZM2G114356	'10.5.2'	'cell wall.cell wall proteins.proline rich proteins'	'moderately similar to ( 221) loc_os10g05990 12010.m21829 protein proline-rich protein, putative, expressed seq=cds; coord=1:119998869..120000361:-1; parent_gene=GRMZM2G114356'	0.05	0	0.15	0	0.05	0.35	0.5	0.8	0.1	0.65
GRMZM2G149624	'10.5.2'	'cell wall.cell wall proteins.proline rich proteins'	'moderately similar to ( 204) loc_os03g14130 12003.m06856 protein proline-rich protein, putative, expressed seq=cds; coord=1:33414927..33416120:-1; parent_gene=GRMZM2G149624'	0	0.1	0.4	0.05	0	0	0	0	0.25	1.75
AC226227.2_FG003	'10.5.3'	'cell wall.cell wall proteins.LRR'	'moderately similar to ( 351) AT4G06744 | Symbols: | leucine-rich repeat family protein / extensin family protein | chr4:4070870-4072084 REVERSEvery weakly similar to (95.5) PSKR_DAUCA Phytosulfokine receptor precursor (EC 2.7.11.1) (Phytosulfokine LRR receptor kinase) - Daucus carota (Carrot)highly similar to ( 600) loc_os04g42620 12004.m09229 protein protein binding protein, putative, expressed…	0	0	0	0	0	0	0	0	0	0
GRMZM2G001058	'10.5.3'	'cell wall.cell wall proteins.LRR'	'weakly similar to ( 105) loc_os12g35710 12012.m07364 protein extensin-like protein, putative, expressed seq=cds; coord=10:24611302..24613437:1; parent_gene=GRMZM2G001058'	0	0	0	0	0	0	0	0	0	0
GRMZM2G042181	'10.5.3'	'cell wall.cell wall proteins.LRR'	'moderately similar to ( 267) AT4G06744 | Symbols: | leucine-rich repeat family protein / extensin family protein | chr4:4070870-4072084 REVERSEvery weakly similar to (84.3) RPK1_IPONI Receptor-like protein kinase precursor (EC 2.7.11.1) - Ipomoea nil (Japanese morning glory) (Pharbitis nil)highly similar to ( 546) loc_os02g40260 12002.m33415 protein protein binding protein, putative, expressed s…	0.4	10.65	19.8	1.35	8.25	0.25	0.2	0.55	1.35	8.65
GRMZM2G060213	'10.5.3'	'cell wall.cell wall proteins.LRR'	'very weakly similar to (82.4) AT1G04300 | Symbols: | FUNCTIONS IN: molecular_function unknown; INVOLVED IN: biological_process unknown; EXPRESSED IN: 24 plant structures; EXPRESSED DURING: 15 growth stages; CONTAINS InterPro DOMAIN/s: TRAF-like (InterPro:IPR008974), MATH (InterPro:IPR002083); BEST Arabidopsis thaliana protein match is: meprin and TRAF homology domain-containing protein / MATH do…	59	57.2	51.95	53.4	38.35	39.25	42.05	42	56.85	41.45
GRMZM2G070322	'10.5.3'	'cell wall.cell wall proteins.LRR'	'moderately similar to ( 389) AT3G22800 | Symbols: | leucine-rich repeat family protein / extensin family protein | chr3:8063063-8064475 REVERSEweakly similar to ( 120) RPK1_IPONI Receptor-like protein kinase precursor (EC 2.7.11.1) - Ipomoea nil (Japanese morning glory) (Pharbitis nil)highly similar to ( 589) loc_os03g58110 12003.m10723 protein systemin receptor SR160 precursor, putative, expres…	0	0	0.05	0	0	0	0.05	0	0	0
GRMZM2G082823	'10.5.3'	'cell wall.cell wall proteins.LRR'	'moderately similar to ( 332) AT1G12040 | Symbols: LRX1 | LRX1 (LEUCINE-RICH REPEAT/EXTENSIN 1); histidine phosphotransfer kinase/ protein binding / structural constituent of cell wall | chr1:4070160-4072394 FORWARDvery weakly similar to (91.3) RPK1_IPONI Receptor-like protein kinase precursor (EC 2.7.11.1) - Ipomoea nil (Japanese morning glory) (Pharbitis nil)moderately similar to ( 466) loc_os0…	16.8	11.65	17.5	14.4	15.2	16	7.15	21.2	20	6.75
GRMZM2G099491	'10.5.3'	'cell wall.cell wall proteins.LRR'	'moderately similar to ( 390) AT3G22800 | Symbols: | leucine-rich repeat family protein / extensin family protein | chr3:8063063-8064475 REVERSEweakly similar to ( 118) RPK1_IPONI Receptor-like protein kinase precursor (EC 2.7.11.1) - Ipomoea nil (Japanese morning glory) (Pharbitis nil)highly similar to ( 588) loc_os03g58110 12003.m10723 protein systemin receptor SR160 precursor, putative, expres…	1.35	0.6	0.6	0.7	0.3	0.2	0.2	0.15	1.1	0.2
GRMZM2G114127	'10.5.3'	'cell wall.cell wall proteins.LRR'	'weakly similar to ( 155) AT1G49750 | Symbols: | leucine-rich repeat family protein | chr1:18411177-18412779 REVERSEmoderately similar to ( 298) loc_os02g40260 12002.m33415 protein protein binding protein, putative, expressed seq=cds; coord=5:184393704..184395078:1; parent_gene=GRMZM2G114127'	0	0	0	0	0	0	0	0	0	0
GRMZM2G136971	'10.5.3'	'cell wall.cell wall proteins.LRR'	'very weakly similar to (92.0) AT1G26250 | Symbols: | proline-rich extensin, putative | chr1:9083903-9085234 FORWARDvery weakly similar to (80.5) loc_os08g01690 12008.m04317 protein vegetative cell wall protein gp1 precursor, putative, expressed seq=cds; coord=7:164068494..164069234:-1; parent_gene=GRMZM2G136971'	0	0	0	0	0	0	0	0	0	0
GRMZM2G149201	'10.5.3'	'cell wall.cell wall proteins.LRR'	'moderately similar to ( 399) AT4G13340 | Symbols: | leucine-rich repeat family protein / extensin family protein | chr4:7758610-7760892 FORWARDweakly similar to ( 104) RPK1_IPONI Receptor-like protein kinase precursor (EC 2.7.11.1) - Ipomoea nil (Japanese morning glory) (Pharbitis nil)highly similar to ( 544) loc_os05g08770 12005.m05391 protein receptor-like protein kinase precursor, putative, e…	24.15	31.65	24.4	25	29.6	23.95	29.7	15.95	21	90.9
GRMZM2G151738	'10.5.3'	'cell wall.cell wall proteins.LRR'	'moderately similar to ( 404) AT4G13340 | Symbols: | leucine-rich repeat family protein / extensin family protein | chr4:7758610-7760892 FORWARDweakly similar to ( 108) RPK1_IPONI Receptor-like protein kinase precursor (EC 2.7.11.1) - Ipomoea nil (Japanese morning glory) (Pharbitis nil)highly similar to ( 546) loc_os05g08770 12005.m05391 protein receptor-like protein kinase precursor, putative, e…	14.25	17.8	21.75	12.95	18.55	15.1	17.85	12.3	14.6	42.35
GRMZM2G153741	'10.5.3'	'cell wall.cell wall proteins.LRR'	'moderately similar to ( 201) AT3G22800 | Symbols: | leucine-rich repeat family protein / extensin family protein | chr3:8063063-8064475 REVERSEmoderately similar to ( 287) loc_os07g07990 12007.m05258 protein receptor protein kinase CLAVATA1 precursor, putative, expressed seq=cds; coord=7:9340555..9341531:-1; parent_gene=GRMZM2G153741'	0	0	0.05	0	0	0	0	0	0	0
GRMZM2G159169	'10.5.3'	'cell wall.cell wall proteins.LRR'	'moderately similar to ( 227) AT4G13340 | Symbols: | leucine-rich repeat family protein / extensin family protein | chr4:7758610-7760892 FORWARDmoderately similar to ( 311) loc_os01g08470 12001.m07472 protein protein binding protein, putative, expressed seq=cds; coord=6:159177480..159179985:1; parent_gene=GRMZM2G159169'	11.6	6.4	8.9	13.3	12.25	16.55	19.85	11.95	14.5	40.75
GRMZM2G169669	'10.5.3'	'cell wall.cell wall proteins.LRR'	'moderately similar to ( 226) AT4G13340 | Symbols: | leucine-rich repeat family protein / extensin family protein | chr4:7758610-7760892 FORWARDvery weakly similar to (80.1) RPK1_IPONI Receptor-like protein kinase precursor (EC 2.7.11.1) - Ipomoea nil (Japanese morning glory) (Pharbitis nil)moderately similar to ( 314) loc_os01g08470 12001.m07472 protein protein binding protein, putative, express…	2.9	2.05	0.9	3.35	3.25	3.55	2.5	1.25	3.05	4.7
GRMZM2G176394	'10.5.3'	'cell wall.cell wall proteins.LRR'	'moderately similar to ( 349) AT4G18670 | Symbols: | protein binding / structural constituent of cell wall | chr4:10275918-10278491 REVERSEweakly similar to ( 113) RPK1_IPONI Receptor-like protein kinase precursor (EC 2.7.11.1) - Ipomoea nil (Japanese morning glory) (Pharbitis nil)highly similar to ( 534) loc_os07g07990 12007.m05258 protein receptor protein kinase CLAVATA1 precursor, putative, ex…	1.05	1.15	2.3	0.7	0.75	1.9	1.85	1.5	3.3	0.9
GRMZM2G300969	'10.5.3'	'cell wall.cell wall proteins.LRR'	'moderately similar to ( 440) AT3G19020 | Symbols: | leucine-rich repeat family protein / extensin family protein | chr3:6559174-6562044 REVERSEweakly similar to ( 122) RPK1_IPONI Receptor-like protein kinase precursor (EC 2.7.11.1) - Ipomoea nil (Japanese morning glory) (Pharbitis nil)highly similar to ( 570) loc_os12g35710 12012.m07364 protein extensin-like protein, putative, expressed seq=cds;…	0	0	0	0	0	0	0	0	0	0
GRMZM2G329484	'10.5.3'	'cell wall.cell wall proteins.LRR'	'moderately similar to ( 215) AT4G28380 | Symbols: | leucine-rich repeat family protein | chr4:14039756-14040931 REVERSEmoderately similar to ( 271) loc_os01g08470 12001.m07472 protein protein binding protein, putative, expressed seq=cds; coord=1:267417236..267418580:-1; parent_gene=GRMZM2G329484'	0	0	0	0	0	0	0	0	0	0
GRMZM2G333811	'10.5.3'	'cell wall.cell wall proteins.LRR'	'moderately similar to ( 427) AT4G13340 | Symbols: | leucine-rich repeat family protein / extensin family protein | chr4:7758610-7760892 FORWARDweakly similar to ( 120) RPK1_IPONI Receptor-like protein kinase precursor (EC 2.7.11.1) - Ipomoea nil (Japanese morning glory) (Pharbitis nil)highly similar to ( 580) loc_os01g41120 12001.m10381 protein protein binding protein, putative, expressed seq=cd…	0	0	0	0	0	0	0	0	0	0
GRMZM2G340084	'10.5.3'	'cell wall.cell wall proteins.LRR'	'moderately similar to ( 366) AT4G06744 | Symbols: | leucine-rich repeat family protein / extensin family protein | chr4:4070870-4072084 REVERSEvery weakly similar to (99.0) RPK1_IPONI Receptor-like protein kinase precursor (EC 2.7.11.1) - Ipomoea nil (Japanese morning glory) (Pharbitis nil)highly similar to ( 564) loc_os04g57430 12004.m10628 protein leucine-rich repeat, plant specific, putative,…	13.4	15.3	14.1	14.15	9.65	9	9.65	12	11.4	11.95
GRMZM2G341410	'10.5.3'	'cell wall.cell wall proteins.LRR'	'moderately similar to ( 365) AT3G22800 | Symbols: | leucine-rich repeat family protein / extensin family protein | chr3:8063063-8064475 REVERSEweakly similar to ( 111) RPK1_IPONI Receptor-like protein kinase precursor (EC 2.7.11.1) - Ipomoea nil (Japanese morning glory) (Pharbitis nil)highly similar to ( 594) loc_os03g43650 12003.m09408 protein leucine-rich repeat receptor protein kinase EXS pre…	0	0	0	0	0	0	0	0	0	0
GRMZM2G342509	'10.5.3'	'cell wall.cell wall proteins.LRR'	'moderately similar to ( 356) AT4G06744 | Symbols: | leucine-rich repeat family protein / extensin family protein | chr4:4070870-4072084 REVERSEvery weakly similar to (95.9) PSKR_DAUCA Phytosulfokine receptor precursor (EC 2.7.11.1) (Phytosulfokine LRR receptor kinase) - Daucus carota (Carrot)highly similar to ( 585) loc_os04g42620 12004.m09229 protein protein binding protein, putative, expressed…	5.3	1.55	4.05	6	2.1	2.35	3.55	3.85	1.15	5.15
GRMZM2G436730	'10.5.3'	'cell wall.cell wall proteins.LRR'	'moderately similar to ( 361) AT4G29240 | Symbols: | leucine-rich repeat family protein / extensin family protein | chr4:14418826-14420073 FORWARDweakly similar to ( 112) RPK1_IPONI Receptor-like protein kinase precursor (EC 2.7.11.1) - Ipomoea nil (Japanese morning glory) (Pharbitis nil)highly similar to ( 520) loc_os05g09640 12005.m05477 protein BRASSINOSTEROID INSENSITIVE 1 precursor, putative…	37.8	28.75	25	29.9	15	10.95	13.4	15	11.65	4.4
GRMZM2G465680	'10.5.3'	'cell wall.cell wall proteins.LRR'	'weakly similar to ( 139) AT5G25550 | Symbols: | leucine-rich repeat family protein / extensin family protein | chr5:8894179-8895480 FORWARDweakly similar to ( 198) loc_os07g07990 12007.m05258 protein receptor protein kinase CLAVATA1 precursor, putative, expressed seq=cds; coord=1:5248293..5249794:1; parent_gene=GRMZM2G465680'	0	0	0	0	0	0	0	0.15	0	0
GRMZM2G476294	'10.5.3'	'cell wall.cell wall proteins.LRR'	'weakly similar to ( 190) AT3G22800 | Symbols: | leucine-rich repeat family protein / extensin family protein | chr3:8063063-8064475 REVERSEmoderately similar to ( 276) loc_os07g07990 12007.m05258 protein receptor protein kinase CLAVATA1 precursor, putative, expressed seq=cds; coord=5:151878554..151879662:-1; parent_gene=GRMZM2G476294'	0	0	0	0	0	0	0	0	0	0
GRMZM2G478920	'10.5.3'	'cell wall.cell wall proteins.LRR'	'moderately similar to ( 433) AT3G19020 | Symbols: | leucine-rich repeat family protein / extensin family protein | chr3:6559174-6562044 REVERSEweakly similar to ( 115) RPK1_IPONI Receptor-like protein kinase precursor (EC 2.7.11.1) - Ipomoea nil (Japanese morning glory) (Pharbitis nil)highly similar to ( 612) loc_os11g43640 12011.m08199 protein extensin-like protein, putative seq=cds; coord=4:34…	0	0	0	0	0	0	0	0	0	0
GRMZM2G478929	'10.5.3'	'cell wall.cell wall proteins.LRR'	'moderately similar to ( 204) AT3G19020 | Symbols: | leucine-rich repeat family protein / extensin family protein | chr3:6559174-6562044 REVERSEvery weakly similar to (88.6) RPK1_IPONI Receptor-like protein kinase precursor (EC 2.7.11.1) - Ipomoea nil (Japanese morning glory) (Pharbitis nil)moderately similar to ( 280) loc_os11g43640 12011.m08199 protein extensin-like protein, putative seq=cds; c…	0	0	0	0	0	0	0	0	0	0
GRMZM2G480698	'10.5.3'	'cell wall.cell wall proteins.LRR'	'moderately similar to ( 230) AT3G22800 | Symbols: | leucine-rich repeat family protein / extensin family protein | chr3:8063063-8064475 REVERSEvery weakly similar to (82.0) RPK1_IPONI Receptor-like protein kinase precursor (EC 2.7.11.1) - Ipomoea nil (Japanese morning glory) (Pharbitis nil)moderately similar to ( 320) loc_os07g07990 12007.m05258 protein receptor protein kinase CLAVATA1 precursor…	0	0.15	0.15	0.1	0.1	0.05	0.1	0.15	0.15	0.3
GRMZM5G805485	'10.5.3'	'cell wall.cell wall proteins.LRR'	'moderately similar to ( 387) AT1G12040 | Symbols: LRX1 | LRX1 (LEUCINE-RICH REPEAT/EXTENSIN 1); histidine phosphotransfer kinase/ protein binding / structural constituent of cell wall | chr1:4070160-4072394 FORWARDweakly similar to ( 112) RPK1_IPONI Receptor-like protein kinase precursor (EC 2.7.11.1) - Ipomoea nil (Japanese morning glory) (Pharbitis nil)highly similar to ( 563) loc_os02g04540 1…	6.4	3.7	7.05	7.35	12.95	10.1	12.4	13.95	6.15	10.2
GRMZM5G838828	'10.5.3'	'cell wall.cell wall proteins.LRR'	'very weakly similar to (86.3) AT4G28380 | Symbols: | leucine-rich repeat family protein | chr4:14039756-14040931 REVERSEweakly similar to ( 115) loc_os07g07990 12007.m05258 protein receptor protein kinase CLAVATA1 precursor, putative, expressed seq=cds; coord=1:5248332..5249675:-1; parent_gene=GRMZM5G838828'	0	0	0	0	0	0	0	0.15	0	0
GRMZM5G841015	'10.5.3'	'cell wall.cell wall proteins.LRR'	'moderately similar to ( 435) AT3G19020 | Symbols: | leucine-rich repeat family protein / extensin family protein | chr3:6559174-6562044 REVERSEweakly similar to ( 115) RPK1_IPONI Receptor-like protein kinase precursor (EC 2.7.11.1) - Ipomoea nil (Japanese morning glory) (Pharbitis nil)highly similar to ( 627) loc_os11g43640 12011.m08199 protein extensin-like protein, putative seq=cds; coord=2:23…	0	0	0	0	0	0	0	0	0	0	pollen extensin-like1
GRMZM5G848542	'10.5.3'	'cell wall.cell wall proteins.LRR'	'very weakly similar to (95.1) AT3G19020 | Symbols: | leucine-rich repeat family protein / extensin family protein | chr3:6559174-6562044 REVERSEweakly similar to ( 119) loc_os05g08770 12005.m05391 protein receptor-like protein kinase precursor, putative, expressed seq=cds; coord=1:286840047..286841795:-1; parent_gene=GRMZM5G848542'	0	0	0	0	0	0	0	0	0	0
GRMZM2G006734	'10.5.4'	'cell wall.cell wall proteins.HRGP'	'weakly similar to ( 144) loc_os07g07680 12007.m29080 protein hydroxyproline-rich glycoprotein, putative, expressed seq=cds; coord=8:4449649..4453055:-1; parent_gene=GRMZM2G006734'	0	0	0	0	0	0	0	0	0	0
GRMZM2G011742	'10.5.4'	'cell wall.cell wall proteins.HRGP'	'moderately similar to ( 344) AT3G22440 | Symbols: | hydroxyproline-rich glycoprotein family protein | chr3:7959854-7961886 FORWARDhighly similar to ( 656) loc_os07g07680 12007.m29080 protein hydroxyproline-rich glycoprotein, putative, expressed seq=cds; coord=7:8700166..8703806:-1; parent_gene=GRMZM2G011742'	264.7	225.2	290.95	215.75	186.9	175.65	220	254.6	202.95	307.2
GRMZM2G032423	'10.5.4'	'cell wall.cell wall proteins.HRGP'	'weakly similar to ( 102) AT1G31814 | Symbols: FRL2 | FRL2 (FRIGIDA LIKE 2) | chr1:11412985-11414406 REVERSEmoderately similar to ( 496) loc_os03g09310 12003.m35065 protein ABI3-interacting protein 2, putative, expressed seq=cds; coord=1:24931336..24941942:1; parent_gene=GRMZM2G032423'	111.4	95	81.35	111.2	108	91.5	105	74.6	101.95	83.55
GRMZM2G069807	'10.5.4'	'cell wall.cell wall proteins.HRGP'	'weakly similar to ( 189) loc_os10g41250 12010.m06889 protein glycoprotein, putative, expressed seq=cds; coord=9:115378515..115380676:-1; parent_gene=GRMZM2G069807'	0	0.15	0.55	0	0.05	0	0.05	0	0	2.05
GRMZM2G153615	'10.5.4'	'cell wall.cell wall proteins.HRGP'	'weakly similar to ( 198) AT4G28300 | Symbols: | hydroxyproline-rich glycoprotein family protein | chr4:14015414-14016823 FORWARDmoderately similar to ( 437) loc_os01g55050 12001.m42723 protein calcium-binding protein, putative, expressed seq=cds; coord=8:174151560..174156934:1; parent_gene=GRMZM2G153615'	40.15	31.55	30.05	37.95	21.2	21.15	27.95	30	31.35	36.6
GRMZM2G170934	'10.5.4'	'cell wall.cell wall proteins.HRGP'	'moderately similar to ( 308) AT3G22440 | Symbols: | hydroxyproline-rich glycoprotein family protein | chr3:7959854-7961886 FORWARDhighly similar to ( 539) loc_os07g07680 12007.m29080 protein hydroxyproline-rich glycoprotein, putative, expressed seq=cds; coord=2:233672747..233676842:1; parent_gene=GRMZM2G170934'	433.75	267.15	326.1	312.85	307.1	300.95	382.3	388.05	343.5	402
GRMZM2G365134	'10.5.4'	'cell wall.cell wall proteins.HRGP'	'moderately similar to ( 224) loc_os10g41250 12010.m06889 protein glycoprotein, putative, expressed seq=cds; coord=1:93267583..93269311:1; parent_gene=GRMZM2G365134'	0.95	1.35	2.3	1.25	1.05	0.65	2.05	1.5	0.2	22.9
GRMZM2G386582	'10.5.4'	'cell wall.cell wall proteins.HRGP'	'weakly similar to ( 108) AT4G28300 | Symbols: | hydroxyproline-rich glycoprotein family protein | chr4:14015414-14016823 FORWARDmoderately similar to ( 221) loc_os05g48760 12005.m08947 protein expressed protein seq=cds; coord=1:168703600..168705246:-1; parent_gene=GRMZM2G386582'	0	0	0	0	0	0	0	0	0	0
GRMZM5G832672	'10.5.4'	'cell wall.cell wall proteins.HRGP'	'weakly similar to ( 137) loc_os01g08580 12001.m07483 protein expressed protein seq=cds; coord=3:9379324..9383521:1; parent_gene=GRMZM5G832672'	100.55	117.7	77.65	109.55	79.3	97.8	88.05	60.15	87	66.1
GRMZM2G034945	'10.5.5'	'cell wall.cell wall proteins.RGP'	'moderately similar to ( 248) AT3G08900 | Symbols: RGP3, RGP | RGP3 (REVERSIBLY GLYCOSYLATED POLYPEPTIDE 3); transferase, transferring hexosyl groups | chr3:2708347-2709714 REVERSEmoderately similar to ( 260) UPTG_MAIZE Alpha-1,4-glucan-protein synthase [UDP-forming] (EC 2.4.1.112) (UDP-glucose:protein transglucosylase) (UPTG) (Amylogenin) (Golgi-associated protein se-wap41) - Zea mays (Maize)mod…	0	0	0	0	0	0	0	0	0	0
GRMZM2G045287	'10.5.5'	'cell wall.cell wall proteins.RGP'	'highly similar to ( 653) AT3G08900 | Symbols: RGP3, RGP | RGP3 (REVERSIBLY GLYCOSYLATED POLYPEPTIDE 3); transferase, transferring hexosyl groups | chr3:2708347-2709714 REVERSEhighly similar to ( 666) UPTG2_SOLTU Alpha-1,4-glucan-protein synthase [UDP-forming] 2 (EC 2.4.1.112) (UDP-glucose:protein transglucosylase 2) (UPTG 2) - Solanum tuberosum (Potato)highly similar to ( 713) loc_os07g41360 120…	10.45	9.8	12	10.3	9.45	9.05	13	11.15	9.35	20.5
GRMZM2G046436	'10.5.5'	'cell wall.cell wall proteins.RGP'	'moderately similar to ( 234) AT3G02230 | Symbols: RGP1, ATRGP1 | RGP1 (REVERSIBLY GLYCOSYLATED POLYPEPTIDE 1); cellulose synthase (UDP-forming) | chr3:415463-417304 FORWARDmoderately similar to ( 234) UPTG_MAIZE Alpha-1,4-glucan-protein synthase [UDP-forming] (EC 2.4.1.112) (UDP-glucose:protein transglucosylase) (UPTG) (Amylogenin) (Golgi-associated protein se-wap41) - Zea mays (Maize)moderately…	0.05	0	0.1	0.05	0.05	0.05	0	0.1	0.05	0.05
GRMZM2G073725	'10.5.5'	'cell wall.cell wall proteins.RGP'	'highly similar to ( 656) AT5G15650 | Symbols: RGP2, ATRGP2 | RGP2 (REVERSIBLY GLYCOSYLATED POLYPEPTIDE 2); transferase, transferring hexosyl groups | chr5:5092203-5094093 FORWARDhighly similar to ( 737) UPTG_MAIZE Alpha-1,4-glucan-protein synthase [UDP-forming] (EC 2.4.1.112) (UDP-glucose:protein transglucosylase) (UPTG) (Amylogenin) (Golgi-associated protein se-wap41) - Zea mays (Maize)highly s…	33.1	42.9	75.5	43.95	59.65	60.15	70.05	53	52.65	138.55
GRMZM2G087326	'10.5.5'	'cell wall.cell wall proteins.RGP'	'highly similar to ( 655) AT5G15650 | Symbols: RGP2, ATRGP2 | RGP2 (REVERSIBLY GLYCOSYLATED POLYPEPTIDE 2); transferase, transferring hexosyl groups | chr5:5092203-5094093 FORWARDhighly similar to ( 739) UPTG_MAIZE Alpha-1,4-glucan-protein synthase [UDP-forming] (EC 2.4.1.112) (UDP-glucose:protein transglucosylase) (UPTG) (Amylogenin) (Golgi-associated protein se-wap41) - Zea mays (Maize)highly s…	35.35	37.75	53.1	54.35	57.5	69.6	69.4	43.5	52.85	64.9
GRMZM2G173341	'10.5.5'	'cell wall.cell wall proteins.RGP'	'moderately similar to ( 449) AT5G16510 | Symbols: | reversibly glycosylated polypeptide, putative | chr5:5393296-5394342 FORWARDmoderately similar to ( 343) UPTG_PEA Alpha-1,4-glucan-protein synthase [UDP-forming] (EC 2.4.1.112) (UDP-glucose:protein transglucosylase) (UPTG) (Reversibly glycosylated polypeptide) - Pisum sativum (Garden pea)highly similar to ( 637) loc_os04g56520 12004.m35219 prot…	3.2	3.25	2.85	3.3	3.85	4.05	3.3	2.85	4.05	4.85
GRMZM2G312543	'10.5.5'	'cell wall.cell wall proteins.RGP'	'weakly similar to ( 124) loc_os04g56520 12004.m35219 protein alpha-1,4-glucan-protein synthase, putative, expressed seq=cds; coord=2:115553315..115553822:1; parent_gene=GRMZM2G312543'	0	0	0	0	0.05	0	0	0	0	0
GRMZM2G456174	'10.5.5'	'cell wall.cell wall proteins.RGP'	'moderately similar to ( 230) AT3G02230 | Symbols: RGP1, ATRGP1 | RGP1 (REVERSIBLY GLYCOSYLATED POLYPEPTIDE 1); cellulose synthase (UDP-forming) | chr3:415463-417304 FORWARDmoderately similar to ( 230) UPTG_MAIZE Alpha-1,4-glucan-protein synthase [UDP-forming] (EC 2.4.1.112) (UDP-glucose:protein transglucosylase) (UPTG) (Amylogenin) (Golgi-associated protein se-wap41) - Zea mays (Maize)moderately…	0	0	0	0	0	0	0	0	0	0
GRMZM2G481027	'10.5.5'	'cell wall.cell wall proteins.RGP'	'weakly similar to ( 198) AT3G02230 | Symbols: RGP1, ATRGP1 | RGP1 (REVERSIBLY GLYCOSYLATED POLYPEPTIDE 1); cellulose synthase (UDP-forming) | chr3:415463-417304 FORWARDweakly similar to ( 200) UPTG_MAIZE Alpha-1,4-glucan-protein synthase [UDP-forming] (EC 2.4.1.112) (UDP-glucose:protein transglucosylase) (UPTG) (Amylogenin) (Golgi-associated protein se-wap41) - Zea mays (Maize)moderately similar…	0	0	0	0	0	0	0	0	0	0
GRMZM5G830681	'10.5.5'	'cell wall.cell wall proteins.RGP'	'highly similar to ( 585) AT3G08900 | Symbols: RGP3, RGP | RGP3 (REVERSIBLY GLYCOSYLATED POLYPEPTIDE 3); transferase, transferring hexosyl groups | chr3:2708347-2709714 REVERSEhighly similar to ( 598) UPTG2_SOLTU Alpha-1,4-glucan-protein synthase [UDP-forming] 2 (EC 2.4.1.112) (UDP-glucose:protein transglucosylase 2) (UPTG 2) - Solanum tuberosum (Potato)highly similar to ( 633) loc_os07g41360 120…	1.2	0.95	0.95	0.9	0.25	0	0.1	0.05	0.15	0.05
GRMZM2G008773	'10.6'	'cell wall.degradation'	'very weakly similar to (99.0) AT5G62150 | Symbols: | peptidoglycan-binding LysM domain-containing protein | chr5:24958325-24958633 FORWARDweakly similar to ( 105) loc_os04g48380 12004.m09774 protein lysM domain containing protein seq=cds; coord=1:3889595..3890323:1; parent_gene=GRMZM2G008773'	11.15	14.05	20.05	16.95	29.4	25.7	23	26.25	17.75	92.7
GRMZM2G424112	'10.6'	'cell wall.degradation'	'weakly similar to ( 101) AT5G62150 | Symbols: | peptidoglycan-binding LysM domain-containing protein | chr5:24958325-24958633 FORWARDweakly similar to ( 127) loc_os04g48380 12004.m09774 protein lysM domain containing protein seq=cds; coord=10:136478132..136478844:-1; parent_gene=GRMZM2G424112'	0	0	0	0	0	0	0	0	0	0.1
GRMZM2G434514	'10.6'	'cell wall.degradation'	'weakly similar to ( 107) AT5G62150 | Symbols: | peptidoglycan-binding LysM domain-containing protein | chr5:24958325-24958633 FORWARDweakly similar to ( 128) loc_os10g38040 12010.m06586 protein lysM domain containing protein, expressed seq=cds; coord=1:80952053..80952695:1; parent_gene=GRMZM2G434514'	0	0.05	0.1	0	0	0	0	0	0	1.8
AC197578.4_FG001	'10.6.1'	'cell wall.degradation.cellulases and beta -1,4-glucanases'	'highly similar to ( 836) AT5G20950 | Symbols: | glycosyl hydrolase family 3 protein | chr5:7107609-7110775 REVERSEnearly identical (1031) loc_os01g56510 12001.m43214 protein periplasmic beta-glucosidase precursor, putative, expressed seq=cds; coord=3:192774502..192779708:-1; parent_gene=AC197578.4_FG001'	5.75	9.2	8.65	10.35	9.65	8.95	8	13.1	8.9	10.95
AC203408.4_FG003	'10.6.1'	'cell wall.degradation.cellulases and beta -1,4-glucanases'	'moderately similar to ( 380) AT2G44550 | Symbols: AtGH9B10 | AtGH9B10 (Arabidopsis thaliana glycosyl hydrolase 9B10); catalytic/ hydrolase, hydrolyzing O-glycosyl compounds | chr2:18389381-18391142 REVERSEmoderately similar to ( 492) GUN14_ORYSA Endoglucanase 14 precursor (EC 3.2.1.4) (Endo-1,4-beta glucanase 14) - Oryza sativa (Rice)moderately similar to ( 492) loc_os05g03840 12005.m04918 prote…	0	0	0	0	0	0	0	0	0	0
GRMZM2G009025	'10.6.1'	'cell wall.degradation.cellulases and beta -1,4-glucanases'	'moderately similar to ( 477) AT1G02800 | Symbols: ATCEL2, CEL2 | ATCEL2; cellulase/ hydrolase, hydrolyzing O-glycosyl compounds | chr1:613386-616103 REVERSEhighly similar to ( 614) GUN19_ORYSA Endoglucanase 19 precursor (EC 3.2.1.4) (Endo-1,4-beta glucanase 19) - Oryza sativa (Rice)highly similar to ( 614) loc_os08g02220 12008.m04366 protein endoglucanase 1 precursor, putative, expressed seq=cds…	6.15	4	5.95	8.7	26.7	36.5	25.1	17.1	3.15	121.7
GRMZM2G013538	'10.6.1'	'cell wall.degradation.cellulases and beta -1,4-glucanases'	'weakly similar to ( 152) AT1G70710 | Symbols: ATGH9B1, CEL1 | ATGH9B1 (ARABIDOPSIS THALIANA GLYCOSYL HYDROLASE 9B1); cellulase/ hydrolase, hydrolyzing O-glycosyl compounds | chr1:26659356-26662962 REVERSEmoderately similar to ( 211) GUN4_ORYSA Endoglucanase 4 precursor (EC 3.2.1.4) (Endo-1,4-beta glucanase 4) (OsGLU14) - Oryza sativa (Rice)moderately similar to ( 211) loc_os02g03120 12002.m05662…	0	0	0	0	0	0	0	0	0	0
GRMZM2G017186	'10.6.1'	'cell wall.degradation.cellulases and beta -1,4-glucanases'	'highly similar to ( 858) AT5G20950 | Symbols: | glycosyl hydrolase family 3 protein | chr5:7107609-7110775 REVERSEnearly identical (1056) loc_os03g53860 12003.m35413 protein periplasmic beta-glucosidase precursor, putative, expressed seq=cds; coord=1:276323898..276328337:1; parent_gene=GRMZM2G017186'	0.05	0.05	0.35	0.1	0.05	0	0	0.05	0.15	0.5
GRMZM2G023986	'10.6.1'	'cell wall.degradation.cellulases and beta -1,4-glucanases'	'highly similar to ( 768) AT5G20950 | Symbols: | glycosyl hydrolase family 3 protein | chr5:7107609-7110775 REVERSEhighly similar to ( 904) loc_os02g03870 12002.m05736 protein periplasmic beta-glucosidase precursor, putative, expressed seq=cds; coord=4:239143373..239146421:-1; parent_gene=GRMZM2G023986'	0	0	0	0	0	0	0	0	0	0
GRMZM2G039976	'10.6.1'	'cell wall.degradation.cellulases and beta -1,4-glucanases'	'weakly similar to ( 132) AT1G70710 | Symbols: ATGH9B1, CEL1 | ATGH9B1 (ARABIDOPSIS THALIANA GLYCOSYL HYDROLASE 9B1); cellulase/ hydrolase, hydrolyzing O-glycosyl compounds | chr1:26659356-26662962 REVERSEweakly similar to ( 184) GUN4_ORYSA Endoglucanase 4 precursor (EC 3.2.1.4) (Endo-1,4-beta glucanase 4) (OsGLU14) - Oryza sativa (Rice)weakly similar to ( 184) loc_os02g03120 12002.m05662 protein…	0	0	0	0	0	0	0	0	0	0
GRMZM2G048165	'10.6.1'	'cell wall.degradation.cellulases and beta -1,4-glucanases'	'highly similar to ( 618) AT4G39010 | Symbols: AtGH9B18 | AtGH9B18 (Arabidopsis thaliana glycosyl hydrolase 9B18); catalytic/ hydrolase, hydrolyzing O-glycosyl compounds | chr4:18176162-18179102 REVERSEhighly similar to ( 789) GUN23_ORYSA Endoglucanase 23 precursor (EC 3.2.1.4) (Endo-1,4-beta glucanase 23) (OsGLU12) - Oryza sativa (Rice)highly similar to ( 789) loc_os09g36060 12009.m06556 protein…	0.3	0.3	0.55	0.6	0.35	0.05	0.35	0.3	0.15	4.45
GRMZM2G076049	'10.6.1'	'cell wall.degradation.cellulases and beta -1,4-glucanases'	'highly similar to ( 709) AT1G70710 | Symbols: ATGH9B1, CEL1 | ATGH9B1 (ARABIDOPSIS THALIANA GLYCOSYL HYDROLASE 9B1); cellulase/ hydrolase, hydrolyzing O-glycosyl compounds | chr1:26659356-26662962 REVERSEhighly similar to ( 899) GUN6_ORYSA Endoglucanase 6 precursor (EC 3.2.1.4) (Endo-1,4-beta glucanase 6) - Oryza sativa (Rice)highly similar to ( 899) loc_os02g50040 12002.m10038 protein endogluca…	320.45	134.25	233.6	361.65	283.2	329.8	538.4	433.7	266.55	266.5
GRMZM2G115065	'10.6.1'	'cell wall.degradation.cellulases and beta -1,4-glucanases'	'highly similar to ( 845) AT3G47000 | Symbols: | glycosyl hydrolase family 3 protein | chr3:17313811-17316539 REVERSEnearly identical (1071) loc_os05g37700 12005.m07949 protein periplasmic beta-glucosidase precursor, putative, expressed seq=cds; coord=6:148835538..148838696:1; parent_gene=GRMZM2G115065'	3.45	4.15	4.5	4	1.2	1.85	2.75	2.3	1.75	2.9
GRMZM2G125436	'10.6.1'	'cell wall.degradation.cellulases and beta -1,4-glucanases'	'highly similar to ( 534) AT1G71380 | Symbols: ATGH9B3, ATCEL3 | ATCEL3 (ARABIDOPSIS THALIANA CELLULASE 3); catalytic/ hydrolase, hydrolyzing O-glycosyl compounds | chr1:26899989-26901749 REVERSEhighly similar to ( 710) GUN11_ORYSA Endoglucanase 11 precursor (EC 3.2.1.4) (Endo-1,4-beta glucanase 11) (OsGLU4) - Oryza sativa (Rice)highly similar to ( 710) loc_os04g36610 12004.m08701 protein family …	0	0	0	0	0	0	0	0	0	0
GRMZM2G125991	'10.6.1'	'cell wall.degradation.cellulases and beta -1,4-glucanases'	'weakly similar to ( 150) AT2G32990 | Symbols: AtGH9B8 | AtGH9B8 (Arabidopsis thaliana glycosyl hydrolase 9B8); catalytic/ hydrolase, hydrolyzing O-glycosyl compounds | chr2:14003361-14005844 FORWARDmoderately similar to ( 209) GUN7_ORYSA Endoglucanase 7 precursor (EC 3.2.1.4) (Endo-1,4-beta glucanase 7) (OsGLU10) - Oryza sativa (Rice)moderately similar to ( 209) loc_os02g50490 12002.m10083 prote…	0.5	0	0.15	0.7	0.1	0	0	0	2	0.05
GRMZM2G141911	'10.6.1'	'cell wall.degradation.cellulases and beta -1,4-glucanases'	'moderately similar to ( 454) AT1G02800 | Symbols: ATCEL2, CEL2 | ATCEL2; cellulase/ hydrolase, hydrolyzing O-glycosyl compounds | chr1:613386-616103 REVERSEhighly similar to ( 596) GUN4_ORYSA Endoglucanase 4 precursor (EC 3.2.1.4) (Endo-1,4-beta glucanase 4) (OsGLU14) - Oryza sativa (Rice)highly similar to ( 596) loc_os02g03120 12002.m05662 protein endoglucanase 1 precursor, putative, expressed …	3.55	0.2	0.95	2.75	11.1	2.85	1.2	2.25	2.7	0.05
GRMZM2G143747	'10.6.1'	'cell wall.degradation.cellulases and beta -1,4-glucanases'	'highly similar to ( 734) AT1G64390 | Symbols: AtGH9C2 | AtGH9C2 (Arabidopsis thaliana glycosyl hydrolase 9C2); carbohydrate binding / catalytic/ hydrolase, hydrolyzing O-glycosyl compounds | chr1:23911329-23914642 FORWARDhighly similar to ( 978) GUN15_ORYSA Endoglucanase 15 precursor (EC 3.2.1.4) (Endo-1,4-beta glucanase 15) - Oryza sativa (Rice)highly similar to ( 978) loc_os05g12150 12005.m056…	0.55	1.25	9.4	1.1	1.15	0.45	1.6	3.45	0.85	43.25
GRMZM2G147422	'10.6.1'	'cell wall.degradation.cellulases and beta -1,4-glucanases'	'highly similar to ( 625) AT1G75680 | Symbols: AtGH9B7 | AtGH9B7 (Arabidopsis thaliana glycosyl hydrolase 9B7); catalytic/ hydrolase, hydrolyzing O-glycosyl compounds | chr1:28417215-28419231 REVERSEhighly similar to ( 884) GUN24_ORYSA Endoglucanase 24 precursor (EC 3.2.1.4) (Endo-1,4-beta glucanase 24) - Oryza sativa (Rice)highly similar to ( 884) loc_os09g36350 12009.m22181 protein endoglucanas…	149.7	100.05	116.15	159.7	142.7	142.75	177.35	144.5	181.7	209.55
GRMZM2G147687	'10.6.1'	'cell wall.degradation.cellulases and beta -1,4-glucanases'	'highly similar to ( 924) AT5G20950 | Symbols: | glycosyl hydrolase family 3 protein | chr5:7107609-7110775 REVERSEnearly identical (1088) loc_os03g53800 12003.m101132 protein periplasmic beta-glucosidase precursor, putative, expressed seq=cds; coord=1:276305013..276310701:1; parent_gene=GRMZM2G147687'	62.8	33.3	47.75	70.7	72.2	84.9	87.95	55.95	46.5	44.55
GRMZM2G151257	'10.6.1'	'cell wall.degradation.cellulases and beta -1,4-glucanases'	'highly similar to ( 606) AT2G32990 | Symbols: AtGH9B8 | AtGH9B8 (Arabidopsis thaliana glycosyl hydrolase 9B8); catalytic/ hydrolase, hydrolyzing O-glycosyl compounds | chr2:14003361-14005844 FORWARDhighly similar to ( 809) GUN7_ORYSA Endoglucanase 7 precursor (EC 3.2.1.4) (Endo-1,4-beta glucanase 7) (OsGLU10) - Oryza sativa (Rice)highly similar to ( 809) loc_os02g50490 12002.m10083 protein endog…	0.7	0.25	0.2	0.9	0.15	0.1	0	0	0.15	0.15
GRMZM2G153987	'10.6.1'	'cell wall.degradation.cellulases and beta -1,4-glucanases'	'highly similar to ( 575) AT1G75680 | Symbols: AtGH9B7 | AtGH9B7 (Arabidopsis thaliana glycosyl hydrolase 9B7); catalytic/ hydrolase, hydrolyzing O-glycosyl compounds | chr1:28417215-28419231 REVERSEhighly similar to ( 775) GUN18_ORYSA Endoglucanase 18 (EC 3.2.1.4) (Endo-1,4-beta glucanase 18) - Oryza sativa (Rice)highly similar to ( 775) loc_os06g50140 12006.m09538 protein endoglucanase 1 precur…	0	0.15	0.1	0.05	0	0	0	0	0.05	0
GRMZM2G154678	'10.6.1'	'cell wall.degradation.cellulases and beta -1,4-glucanases'	'highly similar to ( 598) AT2G32990 | Symbols: AtGH9B8 | AtGH9B8 (Arabidopsis thaliana glycosyl hydrolase 9B8); catalytic/ hydrolase, hydrolyzing O-glycosyl compounds | chr2:14003361-14005844 FORWARDhighly similar to ( 773) GUN16_ORYSA Endoglucanase 16 precursor (EC 3.2.1.4) (Endo-1,4-beta glucanase 16) - Oryza sativa (Rice)highly similar to ( 763) loc_os02g50490 12002.m10083 protein endoglucanas…	0	0	0.1	0	0	0	0	0	0	0.1
GRMZM2G160174	'10.6.1'	'cell wall.degradation.cellulases and beta -1,4-glucanases'	'moderately similar to ( 233) AT5G66930 | Symbols: | unknown protein | chr5:26725839-26727549 FORWARDmoderately similar to ( 311) loc_os12g26044 12012.m73938 protein expressed protein seq=cds; coord=4:134621927..134626199:-1; parent_gene=GRMZM2G160174'	72.55	86.55	74.85	56.35	52.35	41.5	38.65	53.55	72.8	50.75
GRMZM2G167669	'10.6.1'	'cell wall.degradation.cellulases and beta -1,4-glucanases'	'highly similar to ( 520) AT4G23560 | Symbols: AtGH9B15 | AtGH9B15 (Arabidopsis thaliana glycosyl hydrolase 9B15); catalytic/ hydrolase, hydrolyzing O-glycosyl compounds | chr4:12293633-12295788 REVERSEhighly similar to ( 699) GUN20_ORYSA Endoglucanase 20 precursor (EC 3.2.1.4) (Endo-1,4-beta glucanase 20) (OsGLU15) - Oryza sativa (Rice)highly similar to ( 699) loc_os08g29770 12008.m06979 protein…	22.5	27.75	21.1	20.25	16.1	14.5	16.85	16.55	17.95	16.35
GRMZM2G172043	'10.6.1'	'cell wall.degradation.cellulases and beta -1,4-glucanases'	'highly similar to ( 847) AT5G20950 | Symbols: | glycosyl hydrolase family 3 protein | chr5:7107609-7110775 REVERSEnearly identical (1035) loc_os03g53860 12003.m35413 protein periplasmic beta-glucosidase precursor, putative, expressed seq=cds; coord=5:7240427..7245264:-1; parent_gene=GRMZM2G172043'	39.2	18.5	37.95	52.2	49.15	55.85	76	62.4	56.3	57.1
GRMZM2G180782	'10.6.1'	'cell wall.degradation.cellulases and beta -1,4-glucanases'	weakly similar to ( 136) AT1G70710 | Symbols: ATGH9B1, CEL1 | ATGH9B1 (ARABIDOPSIS THALIANA GLYCOSYL HYDROLASE 9B1); cellulase/ hydrolase, hydrolyzing O-glycosyl compounds | chr1:26659356-26662962 REVERSEweakly similar to ( 192) GUN4_ORYSA Endoglucanase 4 precursor (EC 3.2.1.4) (Endo-1,4-beta glucanase 4) (OsGLU14) - Oryza sativa (Rice)weakly similar to ( 192) loc_os02g03120 12002.m05662 protein …	0	0	0	0	0	0	0	0	0	0
GRMZM2G181259	'10.6.1'	'cell wall.degradation.cellulases and beta -1,4-glucanases'	'highly similar to ( 860) AT3G47000 | Symbols: | glycosyl hydrolase family 3 protein | chr3:17313811-17316539 REVERSEnearly identical (1077) loc_os05g37700 12005.m07949 protein periplasmic beta-glucosidase precursor, putative, expressed seq=cds; coord=6:148868745..148871752:-1; parent_gene=GRMZM2G181259'	37.4	27.15	34.7	45.85	49.5	60.45	56.1	38.1	66.65	42.45
GRMZM2G331566	'10.6.1'	'cell wall.degradation.cellulases and beta -1,4-glucanases'	'moderately similar to ( 492) AT4G02290 | Symbols: AtGH9B13 | AtGH9B13 (Arabidopsis thaliana glycosyl hydrolase 9B13); catalytic/ hydrolase, hydrolyzing O-glycosyl compounds | chr4:1002654-1005125 REVERSEhighly similar to ( 605) GUN3_ORYSA Endoglucanase 3 precursor (EC 3.2.1.4) (Endo-1,4-beta glucanase 3) (OsGLU8) - Oryza sativa (Rice)highly similar to ( 605) loc_os01g21070 12001.m08591 protein e…	142.2	27.8	75.8	211.7	166.35	210.85	321.4	286.55	348.05	64.4
GRMZM2G343144	'10.6.1'	'cell wall.degradation.cellulases and beta -1,4-glucanases'	'highly similar to ( 612) AT1G48930 | Symbols: AtGH9C1 | AtGH9C1 (Arabidopsis thaliana glycosyl hydrolase 9C1); catalytic/ hydrolase, hydrolyzing O-glycosyl compounds | chr1:18101782-18104587 REVERSEhighly similar to ( 863) GUN13_ORYSA Endoglucanase 13 precursor (EC 3.2.1.4) (Endo-1,4-beta glucanase 13) (OsGLU6) - Oryza sativa (Rice)highly similar to ( 863) loc_os04g57860 12004.m10670 protein end…	0	0	0	0	0	0	0	0	0	0
GRMZM2G352339	'10.6.1'	'cell wall.degradation.cellulases and beta -1,4-glucanases'	'weakly similar to ( 136) AT1G70710 | Symbols: ATGH9B1, CEL1 | ATGH9B1 (ARABIDOPSIS THALIANA GLYCOSYL HYDROLASE 9B1); cellulase/ hydrolase, hydrolyzing O-glycosyl compounds | chr1:26659356-26662962 REVERSEweakly similar to ( 192) GUN4_ORYSA Endoglucanase 4 precursor (EC 3.2.1.4) (Endo-1,4-beta glucanase 4) (OsGLU14) - Oryza sativa (Rice)weakly similar to ( 192) loc_os02g03120 12002.m05662 protein…	0	0	0	0	0	0	0	0	0	0
GRMZM2G451965	'10.6.1'	'cell wall.degradation.cellulases and beta -1,4-glucanases'	'highly similar to ( 652) AT2G32990 | Symbols: AtGH9B8 | AtGH9B8 (Arabidopsis thaliana glycosyl hydrolase 9B8); catalytic/ hydrolase, hydrolyzing O-glycosyl compounds | chr2:14003361-14005844 FORWARDhighly similar to ( 820) GUN22_ORYSA Endoglucanase 22 precursor (EC 3.2.1.4) (Endo-1,4-beta glucanase 22) (OsGLU11) - Oryza sativa (Rice)highly similar to ( 820) loc_os09g23084 12009.m05465 protein en…	3.7	2.5	6.35	1.6	1.7	1.9	2.8	1.9	2.15	2.75
GRMZM2G453565	'10.6.1'	'cell wall.degradation.cellulases and beta -1,4-glucanases'	'highly similar to ( 692) AT4G11050 | Symbols: AtGH9C3 | AtGH9C3 (Arabidopsis thaliana glycosyl hydrolase 9C3); carbohydrate binding / catalytic/ hydrolase, hydrolyzing O-glycosyl compounds | chr4:6747498-6751311 REVERSEhighly similar to ( 854) GUN2_ORYSA Endoglucanase 2 precursor (EC 3.2.1.4) (Endo-1,4-beta glucanase 2) (OsGLU5) - Oryza sativa (Rice)highly similar to ( 854) loc_os01g12070 12001.…	2.3	2.7	1.45	3.45	1.65	1	0.8	0.45	1.2	0.5
GRMZM2G455642	'10.6.1'	'cell wall.degradation.cellulases and beta -1,4-glucanases'	'highly similar to ( 669) AT1G70710 | Symbols: ATGH9B1, CEL1 | ATGH9B1 (ARABIDOPSIS THALIANA GLYCOSYL HYDROLASE 9B1); cellulase/ hydrolase, hydrolyzing O-glycosyl compounds | chr1:26659356-26662962 REVERSEhighly similar to ( 804) GUN17_ORYSA Endoglucanase 17 precursor (EC 3.2.1.4) (Endo-1,4-beta glucanase 17) (OsGLU13) - Oryza sativa (Rice)highly similar to ( 804) loc_os06g14540 12006.m06169 prot…	51.65	27.75	63.15	55.65	133.4	110.05	127.45	130.05	92.65	45.25
GRMZM2G473711	'10.6.1'	'cell wall.degradation.cellulases and beta -1,4-glucanases'	'highly similar to ( 777) AT5G20950 | Symbols: | glycosyl hydrolase family 3 protein | chr5:7107609-7110775 REVERSEhighly similar to ( 963) loc_os03g53790 12003.m10348 protein periplasmic beta-glucosidase precursor, putative, expressed seq=cds; coord=5:7255630..7258176:-1; parent_gene=GRMZM2G473711'	0	0	0	0	0	0	0.05	0	0	0.05
GRMZM2G482256	'10.6.1'	'cell wall.degradation.cellulases and beta -1,4-glucanases'	'highly similar to ( 597) AT2G32990 | Symbols: AtGH9B8 | AtGH9B8 (Arabidopsis thaliana glycosyl hydrolase 9B8); catalytic/ hydrolase, hydrolyzing O-glycosyl compounds | chr2:14003361-14005844 FORWARDhighly similar to ( 760) GUN5_ORYSA Endoglucanase 5 precursor (EC 3.2.1.4) (Endo-1,4-beta glucanase 5) - Oryza sativa (Rice)highly similar to ( 760) loc_os02g05744 12002.m05922 protein endoglucanase 1…	0	0	0.3	0.05	0.05	0	0	0	0	0.7
GRMZM2G538064	'10.6.1'	'cell wall.degradation.cellulases and beta -1,4-glucanases'	'highly similar to ( 568) AT3G43860 | Symbols: AtGH9A4 | AtGH9A4 (Arabidopsis thaliana Glycosyl Hydrolase 9A4); catalytic/ hydrolase, hydrolyzing O-glycosyl compounds | chr3:15707183-15709438 FORWARDhighly similar to ( 738) GUN8_ORYSA Endoglucanase 8 precursor (EC 3.2.1.4) (Endo-1,4-beta glucanase 8) - Oryza sativa (Rice)highly similar to ( 738) loc_os02g53820 12002.m10411 protein endoglucanase p…	0.05	0.05	0	0	0	0	0	0	0	0
GRMZM2G703265	'10.6.1'	'cell wall.degradation.cellulases and beta -1,4-glucanases'	'weakly similar to ( 138) AT2G32990 | Symbols: AtGH9B8 | AtGH9B8 (Arabidopsis thaliana glycosyl hydrolase 9B8); catalytic/ hydrolase, hydrolyzing O-glycosyl compounds | chr2:14003361-14005844 FORWARDweakly similar to ( 154) GUN22_ORYSA Endoglucanase 22 precursor (EC 3.2.1.4) (Endo-1,4-beta glucanase 22) (OsGLU11) - Oryza sativa (Rice)weakly similar to ( 154) loc_os09g23084 12009.m05465 protein en…	0	0	0	0	0	0	0	0	0.05	0
AC196502.3_FG003	'10.6.2'	'cell wall.degradation.mannan-xylose-arabinose-fucose'	'weakly similar to ( 103) AT2G26770 | Symbols: | plectin-related | chr2:11404257-11407743 REVERSEweakly similar to ( 162) loc_os07g44830 12007.m08704 protein expressed protein seq=cds; coord=6:83967924..83970319:-1; parent_gene=AC196502.3_FG003'	0	0	0	0	0	0	0	0	0	0
AC234091.1_FG001	'10.6.2'	'cell wall.degradation.mannan-xylose-arabinose-fucose'	'highly similar to ( 786) AT1G78060 | Symbols: | glycosyl hydrolase family 3 protein | chr1:29349796-29352868 REVERSEmoderately similar to ( 347) XYNB_PRUPE Putative beta-D-xylosidase (EC 3.2.1.-) (PpAz152) (Fragment) - Prunus persica (Peach)nearly identical (1156) loc_os11g18730 12011.m05948 protein beta-D-xylosidase, putative, expressed seq=cds; coord=2:118690836..118694231:-1; parent_gene=AC23…	0	0	0	0	0	0	0	0	0	0
GRMZM2G003794	'10.6.2'	'cell wall.degradation.mannan-xylose-arabinose-fucose'	'moderately similar to ( 348) AT4G08160 | Symbols: | glycosyl hydrolase family 10 protein / carbohydrate-binding domain-containing protein | chr4:5159495-5162694 REVERSEhighly similar to ( 556) loc_os01g04300 12001.m07065 protein endo-1,4-beta-xylanase, putative, expressed seq=cds; coord=3:20745487..20747924:1; parent_gene=GRMZM2G003794'	0.1	0.05	0.15	0.1	0.4	0	0	0.05	0	3.05
GRMZM2G013255	'10.6.2'	'cell wall.degradation.mannan-xylose-arabinose-fucose'	'moderately similar to ( 415) AT2G28100 | Symbols: ATFUC1 | ATFUC1 (alpha-L-fucosidase 1); alpha-L-fucosidase | chr2:11974803-11976489 FORWARDmoderately similar to ( 405) FUCO1_ORYSA Putative alpha-L-fucosidase 1 precursor (EC 3.2.1.51) (Alpha-L-fucoside fucohydrolase) - Oryza sativa (Rice)highly similar to ( 726) loc_os09g34920 12009.m06492 protein alpha-L-fucosidase 1 precursor, putative, expre…	0.05	0.3	0.25	0.5	0.2	0.85	3.85	3.85	0.2	0.6
GRMZM2G019783	'10.6.2'	'cell wall.degradation.mannan-xylose-arabinose-fucose'	'highly similar to ( 564) AT2G28100 | Symbols: ATFUC1 | ATFUC1 (alpha-L-fucosidase 1); alpha-L-fucosidase | chr2:11974803-11976489 FORWARDhighly similar to ( 790) FUCO1_ORYSA Putative alpha-L-fucosidase 1 precursor (EC 3.2.1.51) (Alpha-L-fucoside fucohydrolase) - Oryza sativa (Rice)highly similar to ( 790) loc_os04g47280 12004.m09674 protein alpha-L-fucosidase 1 precursor, putative, expressed seq…	68.25	78.9	46.75	62.65	47.1	33	30.5	29.2	47.35	25.05
GRMZM2G035503	'10.6.2'	'cell wall.degradation.mannan-xylose-arabinose-fucose'	'highly similar to ( 908) AT1G78060 | Symbols: | glycosyl hydrolase family 3 protein | chr1:29349796-29352868 REVERSEmoderately similar to ( 376) XYNB_PRUPE Putative beta-D-xylosidase (EC 3.2.1.-) (PpAz152) (Fragment) - Prunus persica (Peach)nearly identical (1285) loc_os02g51620 12002.m10194 protein beta-D-xylosidase, putative, expressed seq=cds; coord=5:208090222..208094428:-1; parent_gene=GRMZ…	7.1	3.2	5.6	9.95	1.3	1.15	2.2	1.5	0.6	6.05
GRMZM2G044107	'10.6.2'	'cell wall.degradation.mannan-xylose-arabinose-fucose'	'highly similar to ( 824) AT1G78060 | Symbols: | glycosyl hydrolase family 3 protein | chr1:29349796-29352868 REVERSEmoderately similar to ( 387) XYNB_PRUPE Putative beta-D-xylosidase (EC 3.2.1.-) (PpAz152) (Fragment) - Prunus persica (Peach)nearly identical (1270) loc_os11g19210 12011.m05995 protein beta-D-xylosidase, putative, expressed seq=cds; coord=4:196808116..196813814:1; parent_gene=GRMZM…	0.15	0.15	0.8	0.1	0.2	0.75	2	2.05	0.05	0.25
GRMZM2G048375	'10.6.2'	'cell wall.degradation.mannan-xylose-arabinose-fucose'	'highly similar to ( 548) AT4G33840 | Symbols: | glycosyl hydrolase family 10 protein | chr4:16223694-16226095 REVERSEhighly similar to ( 905) loc_os03g10440 12003.m06497 protein 1,4-beta-xylanase, putative, expressed seq=cds; coord=9:147979866..147983004:-1; parent_gene=GRMZM2G048375'	0	0	0	0	0.05	0	0	0	0	0.1
GRMZM2G051534	'10.6.2'	'cell wall.degradation.mannan-xylose-arabinose-fucose'	'moderately similar to ( 416) AT5G01930 | Symbols: | (1-4)-beta-mannan endohydrolase, putative | chr5:361189-362867 REVERSEhighly similar to ( 586) loc_os12g02520 12012.m04253 protein hydrolase, hydrolyzing O-glycosyl compounds, putative, expressed seq=cds; coord=2:151604248..151606441:1; parent_gene=GRMZM2G051534'	5.15	5.2	3.8	6.45	4.05	2.35	3.3	2.8	4.05	2.5
GRMZM2G055101	'10.6.2'	'cell wall.degradation.mannan-xylose-arabinose-fucose'	'highly similar to ( 592) AT4G33840 | Symbols: | glycosyl hydrolase family 10 protein | chr4:16223694-16226095 REVERSEhighly similar to ( 879) loc_os03g10478 12003.m06501 protein 1,4-beta-xylanase, putative, expressed seq=cds; coord=1:22639252..22643698:1; parent_gene=GRMZM2G055101'	0.05	0.1	0.1	0.05	0.1	0.15	0.05	0	0.2	0.1
GRMZM2G055585	'10.6.2'	'cell wall.degradation.mannan-xylose-arabinose-fucose'	'moderately similar to ( 483) AT5G66460 | Symbols: | (1-4)-beta-mannan endohydrolase, putative | chr5:26538911-26540837 REVERSEhighly similar to ( 584) loc_os01g47400 12001.m10935 protein hydrolase, hydrolyzing O-glycosyl compounds, putative, expressed seq=cds; coord=3:211533675..211537069:-1; parent_gene=GRMZM2G055585'	26.8	26.95	19.05	34.15	19.55	13.4	21.55	19.25	23.5	129.85
GRMZM2G058128	'10.6.2'	'cell wall.degradation.mannan-xylose-arabinose-fucose'	'nearly identical (1053) AT1G10050 | Symbols: | glycosyl hydrolase family 10 protein / carbohydrate-binding domain-containing protein | chr1:3279270-3283444 FORWARDnearly identical (1857) loc_os07g27320 12007.m07007 protein hydrolase, hydrolyzing O-glycosyl compounds, putative, expressed seq=cds; coord=7:43121582..43134716:1; parent_gene=GRMZM2G058128'	22.65	18.4	23	19.35	22.9	24.55	20.95	27.2	29.15	22.7
GRMZM2G093132	'10.6.2'	'cell wall.degradation.mannan-xylose-arabinose-fucose'	'very weakly similar to (92.8) AT1G02640 | Symbols: BXL2, ATBXL2 | BXL2 (BETA-XYLOSIDASE 2); hydrolase, hydrolyzing O-glycosyl compounds | chr1:564293-567580 FORWARDweakly similar to ( 107) loc_os11g44950 12011.m08328 protein auxin-induced beta-glucosidase, putative, expressed seq=cds; coord=3:229427816..229428875:1; parent_gene=GRMZM2G093132'	0	0	0	0	0	0	0	0	0	0
GRMZM2G110993	'10.6.2'	'cell wall.degradation.mannan-xylose-arabinose-fucose'	'moderately similar to ( 316) AT4G28320 | Symbols: | glycosyl hydrolase family 5 protein / cellulase family protein | chr4:14018293-14019972 REVERSEmoderately similar to ( 487) loc_os06g20620 12006.m06719 protein hydrolase, hydrolyzing O-glycosyl compounds, putative, expressed seq=cds; coord=9:43274428..43287822:1; parent_gene=GRMZM2G110993'	12.5	12.2	16.05	11.45	15.75	13.8	11.75	13.35	16.5	13.95
GRMZM2G111998	'10.6.2'	'cell wall.degradation.mannan-xylose-arabinose-fucose'	'highly similar to ( 656) AT5G09730 | Symbols: BXL3, ATBXL3, XYL3, ATBX3, BX3 | BXL3 (beta-xylosidase 3); hydrolase, hydrolyzing O-glycosyl compounds | chr5:3015319-3018226 REVERSEmoderately similar to ( 329) XYNB_PRUPE Putative beta-D-xylosidase (EC 3.2.1.-) (PpAz152) (Fragment) - Prunus persica (Peach)nearly identical (1299) loc_os01g19220 12001.m08459 protein beta-D-xylosidase, putative, expre…	1.1	2.35	1.35	1.35	0.3	0.15	0.25	1.1	0.15	0.55
GRMZM2G136895	'10.6.2'	'cell wall.degradation.mannan-xylose-arabinose-fucose'	'nearly identical (1069) AT5G64570 | Symbols: XYL4, ATBXL4 | XYL4; hydrolase, hydrolyzing O-glycosyl compounds / xylan 1,4-beta-xylosidase | chr5:25810227-25813309 REVERSEmoderately similar to ( 468) XYNB_PRUPE Putative beta-D-xylosidase (EC 3.2.1.-) (PpAz152) (Fragment) - Prunus persica (Peach)nearly identical (1342) loc_os04g54810 12004.m10373 protein beta-D-xylosidase, putative, expressed seq=…	23.95	7	18.05	40.45	30.65	42.85	91.1	48.05	9	7.8
GRMZM2G140201	'10.6.2'	'cell wall.degradation.mannan-xylose-arabinose-fucose'	'highly similar to ( 510) AT2G20680 | Symbols: | glycosyl hydrolase family 5 protein / cellulase family protein | chr2:8921024-8923066 FORWARDhighly similar to ( 669) loc_os01g54300 12001.m11594 protein hydrolase, hydrolyzing O-glycosyl compounds, putative, expressed seq=cds; coord=3:197247511..197250009:-1; parent_gene=GRMZM2G140201'	23.55	17.45	15.7	30.65	15.65	11.65	16.1	16.85	12.65	29.75
GRMZM2G146192	'10.6.2'	'cell wall.degradation.mannan-xylose-arabinose-fucose'	'highly similar to ( 846) AT5G49360 | Symbols: BXL1, ATBXL1 | BXL1 (BETA-XYLOSIDASE 1); hydrolase, hydrolyzing O-glycosyl compounds | chr5:20012179-20016659 REVERSEmoderately similar to ( 468) XYNB_PRUPE Putative beta-D-xylosidase (EC 3.2.1.-) (PpAz152) (Fragment) - Prunus persica (Peach)highly similar to ( 919) loc_os11g44950 12011.m08328 protein auxin-induced beta-glucosidase, putative, express…	14.7	10.8	13.25	21.5	9.6	12.3	33	19.8	14.1	19.9
GRMZM2G146523	'10.6.2'	'cell wall.degradation.mannan-xylose-arabinose-fucose'	'highly similar to ( 619) AT5G64570 | Symbols: XYL4, ATBXL4 | XYL4; hydrolase, hydrolyzing O-glycosyl compounds / xylan 1,4-beta-xylosidase | chr5:25810227-25813309 REVERSEmoderately similar to ( 290) XYNB_PRUPE Putative beta-D-xylosidase (EC 3.2.1.-) (PpAz152) (Fragment) - Prunus persica (Peach)nearly identical (1204) loc_os11g47350 12011.m08515 protein beta-D-xylosidase, putative seq=cds; coord…	0	0	0	0	0	0	0	0	0	0
GRMZM2G164945	'10.6.2'	'cell wall.degradation.mannan-xylose-arabinose-fucose'	'moderately similar to ( 283) AT2G28100 | Symbols: ATFUC1 | ATFUC1 (alpha-L-fucosidase 1); alpha-L-fucosidase | chr2:11974803-11976489 FORWARDmoderately similar to ( 282) FUCO1_ORYSA Putative alpha-L-fucosidase 1 precursor (EC 3.2.1.51) (Alpha-L-fucoside fucohydrolase) - Oryza sativa (Rice)moderately similar to ( 405) loc_os09g34920 12009.m06492 protein alpha-L-fucosidase 1 precursor, putative, e…	0	0	0	0	0	0	0	0	0	0
GRMZM2G170839	'10.6.2'	'cell wall.degradation.mannan-xylose-arabinose-fucose'	'highly similar to ( 536) AT4G33840 | Symbols: | glycosyl hydrolase family 10 protein | chr4:16223694-16226095 REVERSEhighly similar to ( 913) loc_os10g21110 12010.m05130 protein 1,4-beta-xylanase, putative, expressed seq=cds; coord=1:132568513..132571279:1; parent_gene=GRMZM2G170839'	0	0	0	0	0	0	0	0	0	0	xylanase1
GRMZM2G177923	'10.6.2'	'cell wall.degradation.mannan-xylose-arabinose-fucose'	'highly similar to ( 855) AT5G10560 | Symbols: | glycosyl hydrolase family 3 protein | chr5:3336335-3339351 REVERSEmoderately similar to ( 350) XYNB_PRUPE Putative beta-D-xylosidase (EC 3.2.1.-) (PpAz152) (Fragment) - Prunus persica (Peach)nearly identical (1195) loc_os04g44840 12004.m09441 protein beta-D-xylosidase, putative, expressed seq=cds; coord=2:23469563..23473424:1; parent_gene=GRMZM2G17…	9	11.85	11.8	10.7	9.7	13.35	14.9	15.4	11.2	14.55
GRMZM2G308707	'10.6.2'	'cell wall.degradation.mannan-xylose-arabinose-fucose'	'nearly identical (1340) AT1G09010 | Symbols: | glycoside hydrolase family 2 protein | chr1:2895259-2899287 REVERSEnearly identical (1412) EBM_LILLO Mannosylglycoprotein endo-beta-mannosidase (EC 3.2.1.152) (Endo-beta-mannosidase) [Contains: Mannosylglycoprotein endo-beta-mannosidase 31 kDa subunit; Mannosylglycoprotein endo-beta-mannosidase 28 kDa subunit; Mannosylglycoprotein endo-nearly identi…	23.65	16.35	26.45	22.5	19.85	19.85	16.65	27.6	30.45	19.4
GRMZM2G340257	'10.6.2'	'cell wall.degradation.mannan-xylose-arabinose-fucose'	'weakly similar to ( 155) AT5G66460 | Symbols: | (1-4)-beta-mannan endohydrolase, putative | chr5:26538911-26540837 REVERSEmoderately similar to ( 287) loc_os03g61270 12003.m11011 protein 1,4-beta-D-mannan endohydrolase precursor, putative, expressed seq=cds; coord=1:295260464..295261556:-1; parent_gene=GRMZM2G340257'	0.1	0	0.15	0.25	0.1	0.1	0.15	0.05	0.45	0
GRMZM2G343818	'10.6.2'	'cell wall.degradation.mannan-xylose-arabinose-fucose'	'very weakly similar to ( 100) AT1G78060 | Symbols: | glycosyl hydrolase family 3 protein | chr1:29349796-29352868 REVERSEvery weakly similar to (92.0) XYNB_PRUPE Putative beta-D-xylosidase (EC 3.2.1.-) (PpAz152) (Fragment) - Prunus persica (Peach)weakly similar to ( 156) loc_os11g19210 12011.m05995 protein beta-D-xylosidase, putative, expressed seq=cds; coord=4:196811851..196813194:-1; parent_ge…	0	0	0	0	0	0	0.05	0.05	0	0
GRMZM2G343828	'10.6.2'	'cell wall.degradation.mannan-xylose-arabinose-fucose'	'highly similar to ( 790) AT1G78060 | Symbols: | glycosyl hydrolase family 3 protein | chr1:29349796-29352868 REVERSEmoderately similar to ( 358) XYNB_PRUPE Putative beta-D-xylosidase (EC 3.2.1.-) (PpAz152) (Fragment) - Prunus persica (Peach)nearly identical (1098) loc_os11g19210 12011.m05995 protein beta-D-xylosidase, putative, expressed seq=cds; coord=4:196820299..196824464:-1; parent_gene=GRMZ…	0	0	0.05	0	0	0	0	0	0	0
GRMZM2G356046	'10.6.2'	'cell wall.degradation.mannan-xylose-arabinose-fucose'	'moderately similar to ( 304) AT5G66460 | Symbols: | (1-4)-beta-mannan endohydrolase, putative | chr5:26538911-26540837 REVERSEmoderately similar to ( 382) loc_os02g52800 12002.m10310 protein 1,4-beta-D-mannan endohydrolase precursor, putative, expressed seq=cds; coord=4:178504025..178506164:1; parent_gene=GRMZM2G356046'	0	0	0	0	0	0	0	0	0	0
GRMZM2G471065	'10.6.2'	'cell wall.degradation.mannan-xylose-arabinose-fucose'	'very weakly similar to (91.7) loc_os05g25480 12005.m06841 protein hydrolase, hydrolyzing O-glycosyl compounds, putative, expressed seq=cds; coord=6:6619714..6620219:1; parent_gene=GRMZM2G471065'	0	0	0	0	0	0	0	0	0	0
GRMZM5G829293	'10.6.2'	'cell wall.degradation.mannan-xylose-arabinose-fucose'	'weakly similar to ( 188) AT1G78060 | Symbols: | glycosyl hydrolase family 3 protein | chr1:29349796-29352868 REVERSEmoderately similar to ( 241) loc_os11g18730 12011.m05948 protein beta-D-xylosidase, putative, expressed seq=cds; coord=7:144927460..144928530:1; parent_gene=GRMZM5G829293'	0	0	0	0	0	0	0	0	0	0
GRMZM5G850567	'10.6.2'	'cell wall.degradation.mannan-xylose-arabinose-fucose'	'highly similar to ( 581) AT4G33840 | Symbols: | glycosyl hydrolase family 10 protein | chr4:16223694-16226095 REVERSEhighly similar to ( 881) loc_os03g10478 12003.m06501 protein 1,4-beta-xylanase, putative, expressed seq=cds; coord=9:147968842..147972083:1; parent_gene=GRMZM5G850567'	0	0	0	0	0	0	0	0	0	0
AC194852.3_FG007	'10.6.3'	'cell wall.degradation.pectate lyases and polygalacturonases'	'moderately similar to ( 357) AT5G15110 | Symbols: | lyase/ pectate lyase | chr5:4895966-4897682 FORWARDmoderately similar to ( 388) PEL_LILLO Pectate lyase precursor (EC 4.2.2.2) - Lilium longiflorum (Trumpet lily)highly similar to ( 536) loc_os06g38510 12006.m091725 protein pectate lyase precursor, putative, expressed seq=cds; coord=6:103636711..103638258:1; parent_gene=AC194852.3_FG007'	0	0	0	0	0	0	0	0	0	0
AC210013.4_FG017	'10.6.3'	'cell wall.degradation.pectate lyases and polygalacturonases'	'moderately similar to ( 358) AT2G41850 | Symbols: PGAZAT, ADPG2 | PGAZAT (POLYGALACTURONASE ABSCISSION ZONE A. THALIANA); polygalacturonase | chr2:17461918-17464059 REVERSEmoderately similar to ( 361) PGLR_ACTCH Polygalacturonase precursor (EC 3.2.1.15) (PG) (Pectinase) - Actinidia chinensis (Kiwi) (Yangtao)moderately similar to ( 500) loc_os03g59330 12003.m10831 protein polygalacturonase precur…	0	0	0	0	0	0	0	0	0	0
AC213654.3_FG006	'10.6.3'	'cell wall.degradation.pectate lyases and polygalacturonases'	'weakly similar to ( 101) AT1G67750 | Symbols: | pectate lyase family protein | chr1:25401660-25403165 FORWARDweakly similar to ( 111) loc_os04g05050 12004.m35243 protein pectate lyase 8 precursor, putative, expressed seq=cds; coord=3:188017138..188020110:-1; parent_gene=AC213654.3_FG006'	0	0	0	0	0	0	0	0	0	0
AC231180.2_FG006	'10.6.3'	'cell wall.degradation.pectate lyases and polygalacturonases'	'highly similar to ( 535) AT4G23820 | Symbols: | glycoside hydrolase family 28 protein / polygalacturonase (pectinase) family protein | chr4:12397217-12400050 REVERSEvery weakly similar to (90.9) PGLR_ACTCH Polygalacturonase precursor (EC 3.2.1.15) (PG) (Pectinase) - Actinidia chinensis (Kiwi) (Yangtao)highly similar to ( 690) loc_os05g50960 12005.m09163 protein polygalacturonase, putative, expre…	23.65	19.35	35.4	19.1	13.25	13.3	24.95	54.6	14	10.3
AC233851.1_FG011	'10.6.3'	'cell wall.degradation.pectate lyases and polygalacturonases'	'moderately similar to ( 290) AT1G30350 | Symbols: | pectate lyase family protein | chr1:10710194-10711664 REVERSEmoderately similar to ( 259) PEL_LILLO Pectate lyase precursor (EC 4.2.2.2) - Lilium longiflorum (Trumpet lily)moderately similar to ( 474) loc_os08g18970 12008.m05967 protein major pollen allergen Jun a 1 precursor, putative seq=cds; coord=3:189464384..189466218:1; parent_gene=AC2338…	0.05	0.6	1.2	0.3	0.25	0.6	1.05	1.85	0.1	7.45
GRMZM2G002034	'10.6.3'	'cell wall.degradation.pectate lyases and polygalacturonases'	'moderately similar to ( 478) AT1G60590 | Symbols: | polygalacturonase, putative / pectinase, putative | chr1:22314426-22316867 REVERSEmoderately similar to ( 234) PGLR_ACTCH Polygalacturonase precursor (EC 3.2.1.15) (PG) (Pectinase) - Actinidia chinensis (Kiwi) (Yangtao)highly similar to ( 592) loc_os01g44970 12001.m10703 protein polygalacturonase precursor, putative, expressed seq=cds; coord=8:…	0.45	0.3	0.5	0.25	0	0	0.05	0	0.2	0.05
GRMZM2G004435	'10.6.3'	'cell wall.degradation.pectate lyases and polygalacturonases'	'moderately similar to ( 243) AT4G33440 | Symbols: | glycoside hydrolase family 28 protein / polygalacturonase (pectinase) family protein | chr4:16092020-16094732 FORWARDmoderately similar to ( 298) loc_os08g01600 12008.m04308 protein polygalacturonase, putative, expressed seq=cds; coord=6:1239602..1242853:-1; parent_gene=GRMZM2G004435'	0.2	0.55	0.35	0.15	0.1	0.15	0.1	0.25	0.1	4.35
GRMZM2G004500	'10.6.3'	'cell wall.degradation.pectate lyases and polygalacturonases'	'moderately similar to ( 390) AT2G41850 | Symbols: PGAZAT, ADPG2 | PGAZAT (POLYGALACTURONASE ABSCISSION ZONE A. THALIANA); polygalacturonase | chr2:17461918-17464059 REVERSEmoderately similar to ( 395) PGLR_ACTCH Polygalacturonase precursor (EC 3.2.1.15) (PG) (Pectinase) - Actinidia chinensis (Kiwi) (Yangtao)highly similar to ( 538) loc_os03g59330 12003.m10831 protein polygalacturonase precursor,…	0	0	0	0	0	0	0	0	0	0
GRMZM2G005562	'10.6.3'	'cell wall.degradation.pectate lyases and polygalacturonases'	'moderately similar to ( 477) AT3G55140 | Symbols: | pectate lyase family protein | chr3:20439060-20440225 FORWARDweakly similar to ( 148) PEL_LILLO Pectate lyase precursor (EC 4.2.2.2) - Lilium longiflorum (Trumpet lily)highly similar to ( 516) loc_os01g36620 12001.m09957 protein pectate lyase 4 precursor, putative, expressed seq=cds; coord=5:82549227..82555670:-1; parent_gene=GRMZM2G005562'	18.3	20.3	25.75	16.75	14.05	4.8	10.6	11.55	15.75	12.5
GRMZM2G025105	'10.6.3'	'cell wall.degradation.pectate lyases and polygalacturonases'	'moderately similar to ( 254) AT5G06860 | Symbols: PGIP1, ATPGIP1 | PGIP1 (POLYGALACTURONASE INHIBITING PROTEIN 1); protein binding | chr5:2132373-2133434 FORWARDweakly similar to ( 191) PGIP1_PHAVU Polygalacturonase inhibitor 1 precursor (Polygalacturonase-inhibiting protein) (PGIP-1) - Phaseolus vulgaris (Kidney bean) (French bean)moderately similar to ( 348) loc_os05g01370 12005.m04676 protein…	0	0.05	0	0	0	0	0	0	0	0
GRMZM2G026804	'10.6.3'	'cell wall.degradation.pectate lyases and polygalacturonases'	'moderately similar to ( 497) AT1G02460 | Symbols: | glycoside hydrolase family 28 protein / polygalacturonase (pectinase) family protein | chr1:504897-507099 REVERSEmoderately similar to ( 263) PGLR_ACTCH Polygalacturonase precursor (EC 3.2.1.15) (PG) (Pectinase) - Actinidia chinensis (Kiwi) (Yangtao)highly similar to ( 625) loc_os01g19170 12001.m08454 protein polygalacturonase precursor, putati…	0	0.25	0.6	0	0.15	0	0	0.1	0	1.75
GRMZM2G026855	'10.6.3'	'cell wall.degradation.pectate lyases and polygalacturonases'	'moderately similar to ( 350) AT2G43870 | Symbols: | polygalacturonase, putative / pectinase, putative | chr2:18166615-18168264 REVERSEmoderately similar to ( 373) PGLR_PRUPE Polygalacturonase precursor (EC 3.2.1.15) (PG) (Pectinase) - Prunus persica (Peach)highly similar to ( 525) loc_os01g66710 12001.m12778 protein polygalacturonase precursor, putative seq=cds; coord=3:169078215..169080562:-1; …	54.55	40.75	57.25	54.95	39.75	50.75	52	65.25	35.75	54.4
GRMZM2G027782	'10.6.3'	'cell wall.degradation.pectate lyases and polygalacturonases'	'moderately similar to ( 287) AT2G33160 | Symbols: | glycoside hydrolase family 28 protein / polygalacturonase (pectinase) family protein | chr2:14053404-14056246 FORWARDmoderately similar to ( 452) PGLR3_MAIZE Exopolygalacturonase precursor (EC 3.2.1.67) (ExoPG) (Pectinase) (Galacturan 1,4-alpha-galacturonidase) - Zea mays (Maize)moderately similar to ( 480) loc_os01g33300 12001.m09647 protein e…	0	0	0	0	0	0	0	0	0	0
GRMZM2G030265	'10.6.3'	'cell wall.degradation.pectate lyases and polygalacturonases'	'moderately similar to ( 323) AT3G07820 | Symbols: | polygalacturonase 3 (PGA3) / pectinase | chr3:2496597-2498028 REVERSEmoderately similar to ( 461) PGLR3_MAIZE Exopolygalacturonase precursor (EC 3.2.1.67) (ExoPG) (Pectinase) (Galacturan 1,4-alpha-galacturonidase) - Zea mays (Maize)highly similar to ( 586) loc_os02g10300 12002.m06328 protein exopolygalacturonase precursor, putative, expressed s…	9.25	3.7	12	8.65	1.65	1.65	8	10.05	1.15	5.2
GRMZM2G032145	'10.6.3'	'cell wall.degradation.pectate lyases and polygalacturonases'	'weakly similar to ( 101) AT5G25610 | Symbols: RD22 | RD22; nutrient reservoir | chr5:8914498-8916684 REVERSEmoderately similar to ( 226) loc_os02g18690 12002.m07112 protein BURP domain containing protein, expressed seq=cds; coord=7:6570606..6574556:1; parent_gene=GRMZM2G032145'	0	0.05	0	0	0	0	0	0	0	0
GRMZM2G034835	'10.6.3'	'cell wall.degradation.pectate lyases and polygalacturonases'	'moderately similar to ( 322) AT3G07970 | Symbols: QRT2 | QRT2 (QUARTET 2); polygalacturonase | chr3:2541006-2543370 FORWARDmoderately similar to ( 334) PGLR_ACTCH Polygalacturonase precursor (EC 3.2.1.15) (PG) (Pectinase) - Actinidia chinensis (Kiwi) (Yangtao)highly similar to ( 559) loc_os03g11760 12003.m06628 protein polygalacturonase precursor, putative, expressed seq=cds; coord=9:146528352..…	0	0.1	0	0.05	0.2	0.2	0.4	0.25	0.3	0
GRMZM2G037431	'10.6.3'	'cell wall.degradation.pectate lyases and polygalacturonases'	'highly similar to ( 515) AT1G60590 | Symbols: | polygalacturonase, putative / pectinase, putative | chr1:22314426-22316867 REVERSEmoderately similar to ( 248) PGLR_ACTCH Polygalacturonase precursor (EC 3.2.1.15) (PG) (Pectinase) - Actinidia chinensis (Kiwi) (Yangtao)highly similar to ( 734) loc_os01g44970 12001.m10703 protein polygalacturonase precursor, putative, expressed seq=cds; coord=3:2159…	11.1	3.6	6.1	16.15	2.4	4.45	6.9	13.05	2.4	4.15
GRMZM2G047414	'10.6.3'	'cell wall.degradation.pectate lyases and polygalacturonases'	'highly similar to ( 658) AT1G19170 | Symbols: | glycoside hydrolase family 28 protein / polygalacturonase (pectinase) family protein | chr1:6616777-6618875 FORWARDweakly similar to ( 112) PGLR_ACTCH Polygalacturonase precursor (EC 3.2.1.15) (PG) (Pectinase) - Actinidia chinensis (Kiwi) (Yangtao)highly similar to ( 592) loc_os09g26800 12009.m05832 protein polygalacturonase, putative, expressed se…	0.05	0	0	0	0	0.05	0	0	0.05	0.05
GRMZM2G052844	'10.6.3'	'cell wall.degradation.pectate lyases and polygalacturonases'	'highly similar to ( 574) AT4G23820 | Symbols: | glycoside hydrolase family 28 protein / polygalacturonase (pectinase) family protein | chr4:12397217-12400050 REVERSEvery weakly similar to (96.3) PGLR_ACTCH Polygalacturonase precursor (EC 3.2.1.15) (PG) (Pectinase) - Actinidia chinensis (Kiwi) (Yangtao)highly similar to ( 762) loc_os01g43160 12001.m10579 protein polygalacturonase, putative, expre…	57.25	79.35	64.6	61.45	79.35	89.85	106.25	162.4	67.1	161.85
GRMZM2G054410	'10.6.3'	'cell wall.degradation.pectate lyases and polygalacturonases'	'moderately similar to ( 251) AT3G07970 | Symbols: QRT2 | QRT2 (QUARTET 2); polygalacturonase | chr3:2541006-2543370 FORWARDmoderately similar to ( 224) PGLR_ACTCH Polygalacturonase precursor (EC 3.2.1.15) (PG) (Pectinase) - Actinidia chinensis (Kiwi) (Yangtao)highly similar to ( 501) loc_os01g07790 12001.m07406 protein polygalacturonase precursor, putative seq=cds; coord=3:12133122..12135275:-1;…	0.05	0	0.15	0.1	0.05	0	0.05	0.15	0.15	0
GRMZM2G057296	'10.6.3'	'cell wall.degradation.pectate lyases and polygalacturonases'	'highly similar to ( 588) AT3G62110 | Symbols: | glycoside hydrolase family 28 protein / polygalacturonase (pectinase) family protein | chr3:22997313-22999503 REVERSEweakly similar to ( 106) PGLR_ACTCH Polygalacturonase precursor (EC 3.2.1.15) (PG) (Pectinase) - Actinidia chinensis (Kiwi) (Yangtao)highly similar to ( 795) loc_os07g14160 12007.m29117 protein polygalacturonase-like protein, putativ…	21.75	21.15	24.95	19.65	24.1	25.45	23.7	26.95	32.2	25.5
GRMZM2G058033	'10.6.3'	'cell wall.degradation.pectate lyases and polygalacturonases'	'moderately similar to ( 206) AT3G07840 | Symbols: | polygalacturonase, putative / pectinase, putative | chr3:2501893-2503475 REVERSEmoderately similar to ( 446) PGLR1_MAIZE Exopolygalacturonase precursor (EC 3.2.1.67) (ExoPG) (Pectinase) (Galacturan 1,4-alpha-galacturonidase) - Zea mays (Maize)moderately similar to ( 376) loc_os06g35370 12006.m08074 protein exopolygalacturonase precursor, putati…	0	0	0	0	0	0	0	0	0	0
GRMZM2G066675	'10.6.3'	'cell wall.degradation.pectate lyases and polygalacturonases'	'moderately similar to ( 265) AT3G14040 | Symbols: | exopolygalacturonase / galacturan 1,4-alpha-galacturonidase / pectinase | chr3:4648607-4650226 REVERSEhighly similar to ( 749) PGLR1_MAIZE Exopolygalacturonase precursor (EC 3.2.1.67) (ExoPG) (Pectinase) (Galacturan 1,4-alpha-galacturonidase) - Zea mays (Maize)highly similar to ( 550) loc_os06g35370 12006.m08074 protein exopolygalacturonase pre…	0	0	0	0	0	0	0	0	0	0
GRMZM2G078779	'10.6.3'	'cell wall.degradation.pectate lyases and polygalacturonases'	'weakly similar to ( 150) loc_os09g30320 12009.m06183 protein BURP domain containing protein, expressed seq=cds; coord=7:131189769..131191106:1; parent_gene=GRMZM2G078779'	0	0	0	0	0	0	0	0	0	0
GRMZM2G079263	'10.6.3'	'cell wall.degradation.pectate lyases and polygalacturonases'	'moderately similar to ( 389) AT1G80170 | Symbols: | polygalacturonase, putative / pectinase, putative | chr1:30153646-30155683 REVERSEmoderately similar to ( 335) PGLR_ACTCH Polygalacturonase precursor (EC 3.2.1.15) (PG) (Pectinase) - Actinidia chinensis (Kiwi) (Yangtao)highly similar to ( 648) loc_os05g46510 12005.m08774 protein polygalacturonase precursor, putative, expressed seq=cds; coord=6:…	0.6	0.5	0.85	0.3	0.6	0.15	0	0.1	1.5	0.8
GRMZM2G079617	'10.6.3'	'cell wall.degradation.pectate lyases and polygalacturonases'	'moderately similar to ( 229) AT1G70500 | Symbols: | polygalacturonase, putative / pectinase, putative | chr1:26566579-26568729 REVERSEweakly similar to ( 192) PGLR_ACTCH Polygalacturonase precursor (EC 3.2.1.15) (PG) (Pectinase) - Actinidia chinensis (Kiwi) (Yangtao)moderately similar to ( 342) loc_os05g46520 12005.m08775 protein polygalacturonase precursor, putative, expressed seq=cds; coord=6:…	22.8	2.9	16.8	21.15	28.6	9.05	4.6	6.55	55.85	1.75
GRMZM2G080056	'10.6.3'	'cell wall.degradation.pectate lyases and polygalacturonases'	'moderately similar to ( 442) AT3G01270 | Symbols: | pectate lyase family protein | chr3:82892-84720 REVERSEmoderately similar to ( 494) PEL_LILLO Pectate lyase precursor (EC 4.2.2.2) - Lilium longiflorum (Trumpet lily)highly similar to ( 611) loc_os02g12300 12002.m06478 protein pectate lyase precursor, putative, expressed seq=cds; coord=4:230884015..230886011:1; parent_gene=GRMZM2G080056'	0	0	0	0	0	0	0	0	0	0
GRMZM2G088531	'10.6.3'	'cell wall.degradation.pectate lyases and polygalacturonases'	'moderately similar to ( 270) AT5G06860 | Symbols: PGIP1, ATPGIP1 | PGIP1 (POLYGALACTURONASE INHIBITING PROTEIN 1); protein binding | chr5:2132373-2133434 FORWARDmoderately similar to ( 225) PGIP1_ORYSA Polygalacturonase inhibitor 1 precursor (Polygalacturonase-inhibiting protein) (Floral organ regulator 1) - Oryza sativa (Rice)moderately similar to ( 367) loc_os05g01370 12005.m04676 protein poly…	0.1	0.05	0	0	0	0	0	0	0	0
GRMZM2G092746	'10.6.3'	'cell wall.degradation.pectate lyases and polygalacturonases'	'moderately similar to ( 400) AT3G57510 | Symbols: ADPG1 | ADPG1; polygalacturonase | chr3:21283546-21285842 REVERSEmoderately similar to ( 410) PGLR_ACTCH Polygalacturonase precursor (EC 3.2.1.15) (PG) (Pectinase) - Actinidia chinensis (Kiwi) (Yangtao)highly similar to ( 548) loc_os03g59330 12003.m10831 protein polygalacturonase precursor, putative, expressed seq=cds; coord=1:290561946..29056359…	1.25	1.55	1.1	1	0.25	0.35	0.2	1.05	0.2	0.15
GRMZM2G094811	'10.6.3'	'cell wall.degradation.pectate lyases and polygalacturonases'	'moderately similar to ( 323) AT2G26620 | Symbols: | glycoside hydrolase family 28 protein / polygalacturonase (pectinase) family protein | chr2:11325163-11326835 REVERSEhighly similar to ( 837) PGLR2_MAIZE Exopolygalacturonase precursor (EC 3.2.1.67) (ExoPG) (Pectinase) (Galacturan 1,4-alpha-galacturonidase) - Zea mays (Maize)highly similar to ( 627) loc_os06g35370 12006.m08074 protein exopolyga…	0	0	0	0	0	0	0	0	0	0
GRMZM2G098912	'10.6.3'	'cell wall.degradation.pectate lyases and polygalacturonases'	'moderately similar to ( 493) AT1G48100 | Symbols: | glycoside hydrolase family 28 protein / polygalacturonase (pectinase) family protein | chr1:17766921-17769625 FORWARDmoderately similar to ( 254) PGLR_ACTCH Polygalacturonase precursor (EC 3.2.1.15) (PG) (Pectinase) - Actinidia chinensis (Kiwi) (Yangtao)highly similar to ( 634) loc_os01g22590 12001.m08738 protein polygalacturonase, putative, ex…	0	0	0	0	0	0	0.05	0	0	0
GRMZM2G106980	'10.6.3'	'cell wall.degradation.pectate lyases and polygalacturonases'	'weakly similar to ( 115) AT5G25610 | Symbols: RD22 | RD22; nutrient reservoir | chr5:8914498-8916684 REVERSEmoderately similar to ( 308) loc_os06g19800 12006.m06638 protein BURP domain containing protein, expressed seq=cds; coord=1:203647149..203653762:-1; parent_gene=GRMZM2G106980'	0	0	0.05	0.25	0	0	0	0	0	0
GRMZM2G107073	'10.6.3'	'cell wall.degradation.pectate lyases and polygalacturonases'	'highly similar to ( 607) AT3G61490 | Symbols: | glycoside hydrolase family 28 protein / polygalacturonase (pectinase) family protein | chr3:22758439-22760137 FORWARDvery weakly similar to (93.6) PGLR_PRUPE Polygalacturonase precursor (EC 3.2.1.15) (PG) (Pectinase) - Prunus persica (Peach)highly similar to ( 543) loc_os03g03350 12003.m05870 protein glycoside hydrolase, family 28, putative, expres…	48.15	33.55	36.9	49.55	35.2	43.75	43.55	37.2	47.2	32.85
GRMZM2G108422	'10.6.3'	'cell wall.degradation.pectate lyases and polygalacturonases'	'very weakly similar to (99.8) AT5G25610 | Symbols: RD22 | RD22; nutrient reservoir | chr5:8914498-8916684 REVERSEweakly similar to ( 131) loc_os01g53240 12001.m11493 protein dehydration-induced protein RD22-like protein 2, putative, expressed seq=cds; coord=1:170716551..170717604:-1; parent_gene=GRMZM2G108422'	0	0	0	0	0	0	0	0	0	0
GRMZM2G111609	'10.6.3'	'cell wall.degradation.pectate lyases and polygalacturonases'	'moderately similar to ( 402) AT3G57510 | Symbols: ADPG1 | ADPG1; polygalacturonase | chr3:21283546-21285842 REVERSEmoderately similar to ( 414) PGLR_ACTCH Polygalacturonase precursor (EC 3.2.1.15) (PG) (Pectinase) - Actinidia chinensis (Kiwi) (Yangtao)highly similar to ( 558) loc_os03g59330 12003.m10831 protein polygalacturonase precursor, putative, expressed seq=cds; coord=1:290589211..29059099…	0	0	0	0	0	0	0	0	0	0
GRMZM2G112579	'10.6.3'	'cell wall.degradation.pectate lyases and polygalacturonases'	'moderately similar to ( 298) AT2G15450 | Symbols: | glycoside hydrolase family 28 protein / polygalacturonase (pectinase) family protein | chr2:6747536-6749256 FORWARDmoderately similar to ( 466) PGLR3_MAIZE Exopolygalacturonase precursor (EC 3.2.1.67) (ExoPG) (Pectinase) (Galacturan 1,4-alpha-galacturonidase) - Zea mays (Maize)highly similar to ( 509) loc_os01g33300 12001.m09647 protein exopoly…	0	0	0	0	0	0	0	0	0	0
GRMZM2G113229	'10.6.3'	'cell wall.degradation.pectate lyases and polygalacturonases'	'weakly similar to ( 141) AT5G25610 | Symbols: RD22 | RD22; nutrient reservoir | chr5:8914498-8916684 REVERSEmoderately similar to ( 363) loc_os08g38810 12008.m07864 protein RAFTIN1a protein, putative, expressed seq=cds; coord=1:183781160..183783089:1; parent_gene=GRMZM2G113229'	1.3	1.25	1.45	0.6	0.8	0.65	0.5	0.4	1.2	0.95
GRMZM2G113815	'10.6.3'	'cell wall.degradation.pectate lyases and polygalacturonases'	'highly similar to ( 525) AT3G16850 | Symbols: | glycoside hydrolase family 28 protein / polygalacturonase (pectinase) family protein | chr3:5748692-5750981 FORWARDhighly similar to ( 698) loc_os12g36810 12012.m07466 protein polygalacturonase, putative, expressed seq=cds; coord=10:22363483..22367295:-1; parent_gene=GRMZM2G113815'	7.25	7.35	9.5	6.05	6.75	5.55	5.7	8.75	6.8	10.65
GRMZM2G119494	'10.6.3'	'cell wall.degradation.pectate lyases and polygalacturonases'	'highly similar to ( 557) AT3G48950 | Symbols: | glycoside hydrolase family 28 protein / polygalacturonase (pectinase) family protein | chr3:18148017-18149987 FORWARDvery weakly similar to (86.7) PGLR_ACTCH Polygalacturonase precursor (EC 3.2.1.15) (PG) (Pectinase) - Actinidia chinensis (Kiwi) (Yangtao)highly similar to ( 767) loc_os03g03350 12003.m05870 protein glycoside hydrolase, family 28, pu…	29	36.15	31.8	27	17.65	21.75	24.75	40.55	16.95	33.45
GRMZM2G126077	'10.6.3'	'cell wall.degradation.pectate lyases and polygalacturonases'	'moderately similar to ( 399) AT3G55140 | Symbols: | pectate lyase family protein | chr3:20439060-20440225 FORWARDweakly similar to ( 113) PEL_LILLO Pectate lyase precursor (EC 4.2.2.2) - Lilium longiflorum (Trumpet lily)moderately similar to ( 413) loc_os01g62000 12001.m12323 protein pectate lyase 4 precursor, putative seq=cds; coord=3:181751086..181752487:-1; parent_gene=GRMZM2G126077'	0	0	0	0	0	0	0	0	0	0
GRMZM2G128520	'10.6.3'	'cell wall.degradation.pectate lyases and polygalacturonases'	'very weakly similar to (92.4) AT1G60770 | Symbols: | pentatricopeptide (PPR) repeat-containing protein | chr1:22366959-22368648 REVERSEweakly similar to ( 113) loc_os04g25410 12004.m07669 protein tetratricopeptide-like helical, putative, expressed seq=cds; coord=7:9102603..9113181:-1; parent_gene=GRMZM2G128520'	0	0	0	0	0	0	0	0	0	0
GRMZM2G129635	'10.6.3'	'cell wall.degradation.pectate lyases and polygalacturonases'	'moderately similar to ( 426) AT5G15110 | Symbols: | lyase/ pectate lyase | chr5:4895966-4897682 FORWARDmoderately similar to ( 482) PEL_LILLO Pectate lyase precursor (EC 4.2.2.2) - Lilium longiflorum (Trumpet lily)highly similar to ( 652) loc_os06g38510 12006.m091725 protein pectate lyase precursor, putative, expressed seq=cds; coord=9:83485973..83487886:1; parent_gene=GRMZM2G129635'	0	0	0	0	0	0	0	0	0	0
GRMZM2G130401	'10.6.3'	'cell wall.degradation.pectate lyases and polygalacturonases'	'weakly similar to ( 174) AT2G26620 | Symbols: | glycoside hydrolase family 28 protein / polygalacturonase (pectinase) family protein | chr2:11325163-11326835 REVERSEmoderately similar to ( 488) PGLR2_MAIZE Exopolygalacturonase precursor (EC 3.2.1.67) (ExoPG) (Pectinase) (Galacturan 1,4-alpha-galacturonidase) - Zea mays (Maize)moderately similar to ( 327) loc_os06g35370 12006.m08074 protein exopo…	0	0	0	0	0	0	0	0	0	0
GRMZM2G131912	'10.6.3'	'cell wall.degradation.pectate lyases and polygalacturonases'	'highly similar to ( 638) AT4G13710 | Symbols: | pectate lyase family protein | chr4:7962550-7966012 FORWARDmoderately similar to ( 431) PEL_LILLO Pectate lyase precursor (EC 4.2.2.2) - Lilium longiflorum (Trumpet lily)highly similar to ( 744) loc_os04g05050 12004.m35243 protein pectate lyase 8 precursor, putative, expressed seq=cds; coord=2:109575238..109580764:-1; parent_gene=GRMZM2G131912'	17.7	23.3	24.3	12.8	44.95	24.2	29.05	20.5	21.4	116.7
GRMZM2G135763	'10.6.3'	'cell wall.degradation.pectate lyases and polygalacturonases'	'highly similar to ( 621) AT1G19170 | Symbols: | glycoside hydrolase family 28 protein / polygalacturonase (pectinase) family protein | chr1:6616777-6618875 FORWARDweakly similar to ( 101) PGLR_ACTCH Polygalacturonase precursor (EC 3.2.1.15) (PG) (Pectinase) - Actinidia chinensis (Kiwi) (Yangtao)highly similar to ( 809) loc_os09g26800 12009.m05832 protein polygalacturonase, putative, expressed se…	9.5	9.2	11.65	9.55	17.45	16.25	13.4	22.3	9.9	20.55
GRMZM2G137077	'10.6.3'	'cell wall.degradation.pectate lyases and polygalacturonases'	'highly similar to ( 522) AT3G57790 | Symbols: | glycoside hydrolase family 28 protein / polygalacturonase (pectinase) family protein | chr3:21405387-21407088 REVERSEhighly similar to ( 749) loc_os09g31270 12009.m06241 protein polygalacturonase, putative, expressed seq=cds; coord=7:132820064..132822170:-1; parent_gene=GRMZM2G137077'	8.2	12	7	7.4	4.75	3.85	4	3.5	6	4.4
GRMZM2G139396	'10.6.3'	'cell wall.degradation.pectate lyases and polygalacturonases'	'moderately similar to ( 307) AT1G30350 | Symbols: | pectate lyase family protein | chr1:10710194-10711664 REVERSEmoderately similar to ( 264) PEL_LILLO Pectate lyase precursor (EC 4.2.2.2) - Lilium longiflorum (Trumpet lily)highly similar to ( 518) loc_os08g18970 12008.m05967 protein major pollen allergen Jun a 1 precursor, putative seq=cds; coord=8:171750536..171752008:1; parent_gene=GRMZM2G139…	0	0	0	0	0	0	0	0	0	0
GRMZM2G139828	'10.6.3'	'cell wall.degradation.pectate lyases and polygalacturonases'	'moderately similar to ( 492) AT3G16850 | Symbols: | glycoside hydrolase family 28 protein / polygalacturonase (pectinase) family protein | chr3:5748692-5750981 FORWARDvery weakly similar to (81.6) PGLR_ACTCH Polygalacturonase precursor (EC 3.2.1.15) (PG) (Pectinase) - Actinidia chinensis (Kiwi) (Yangtao)highly similar to ( 676) loc_os11g43750 12011.m08210 protein polygalacturonase, putative, exp…	10.65	10.4	8.8	8.45	5.8	4.4	4.35	4.3	7	7.5
GRMZM2G146665	'10.6.3'	'cell wall.degradation.pectate lyases and polygalacturonases'	'highly similar to ( 551) AT1G70370 | Symbols: | BURP domain-containing protein / polygalacturonase, putative | chr1:26513003-26514998 REVERSEhighly similar to ( 806) loc_os09g16010 12009.m04862 protein polygalacturonase-1 non-catalytic beta subunit precursor, putative, expressed seq=cds; coord=7:91364728..91366958:1; parent_gene=GRMZM2G146665'	0	0	0	0	0	0	0	0	0	0
GRMZM2G147756	'10.6.3'	'cell wall.degradation.pectate lyases and polygalacturonases'	'highly similar to ( 568) AT1G70370 | Symbols: | BURP domain-containing protein / polygalacturonase, putative | chr1:26513003-26514998 REVERSEhighly similar to ( 933) loc_os08g29200 12008.m06924 protein polygalacturonase-1 non-catalytic beta subunit precursor, putative, expressed seq=cds; coord=4:72815461..72818160:1; parent_gene=GRMZM2G147756'	8.1	11	18	11.8	12	9.5	10.45	12.8	10.85	15.15
GRMZM2G151755	'10.6.3'	'cell wall.degradation.pectate lyases and polygalacturonases'	'moderately similar to ( 322) AT3G07820 | Symbols: | polygalacturonase 3 (PGA3) / pectinase | chr3:2496597-2498028 REVERSEmoderately similar to ( 480) PGLR3_MAIZE Exopolygalacturonase precursor (EC 3.2.1.67) (ExoPG) (Pectinase) (Galacturan 1,4-alpha-galacturonidase) - Zea mays (Maize)highly similar to ( 620) loc_os02g10300 12002.m06328 protein exopolygalacturonase precursor, putative, expressed s…	0	0	0	0	0	0	0	0	0	0
GRMZM2G153262	'10.6.3'	'cell wall.degradation.pectate lyases and polygalacturonases'	'weakly similar to ( 155) AT2G26620 | Symbols: | glycoside hydrolase family 28 protein / polygalacturonase (pectinase) family protein | chr2:11325163-11326835 REVERSEmoderately similar to ( 341) PGLR2_MAIZE Exopolygalacturonase precursor (EC 3.2.1.67) (ExoPG) (Pectinase) (Galacturan 1,4-alpha-galacturonidase) - Zea mays (Maize)moderately similar to ( 257) loc_os06g35370 12006.m08074 protein exopo…	0	0	0	0	0	0	0	0	0	0
GRMZM2G153666	'10.6.3'	'cell wall.degradation.pectate lyases and polygalacturonases'	'moderately similar to ( 314) AT4G18180 | Symbols: | glycoside hydrolase family 28 protein / polygalacturonase (pectinase) family protein | chr4:10065626-10067317 FORWARDmoderately similar to ( 310) PGLR_BRANA Polygalacturonase precursor (EC 3.2.1.15) (PG) (Pectinase) - Brassica napus (Rape)highly similar to ( 579) loc_os06g40880 12006.m08623 protein polygalacturonase precursor, putative, express…	0	0	0	0.05	0	0	0	0	0	0
GRMZM2G154124	'10.6.3'	'cell wall.degradation.pectate lyases and polygalacturonases'	'highly similar to ( 884) AT1G09890 | Symbols: | lyase | chr1:3214237-3217386 REVERSEnearly identical (1221) loc_os08g44020 12008.m080048 protein lyase, putative, expressed seq=cds; coord=1:206155710..206160274:-1; parent_gene=GRMZM2G154124'	0.6	1	2.5	0.6	2.05	3.6	3.7	2.75	3.45	4.65
GRMZM2G160526	'10.6.3'	'cell wall.degradation.pectate lyases and polygalacturonases'	'moderately similar to ( 329) AT3G14040 | Symbols: | exopolygalacturonase / galacturan 1,4-alpha-galacturonidase / pectinase | chr3:4648607-4650226 REVERSEhighly similar to ( 812) PGLR3_MAIZE Exopolygalacturonase precursor (EC 3.2.1.67) (ExoPG) (Pectinase) (Galacturan 1,4-alpha-galacturonidase) - Zea mays (Maize)highly similar to ( 624) loc_os06g35370 12006.m08074 protein exopolygalacturonase pre…	0	0	0	0	0	0	0	0	0	0
GRMZM2G160626	'10.6.3'	'cell wall.degradation.pectate lyases and polygalacturonases'	'moderately similar to ( 329) AT3G14040 | Symbols: | exopolygalacturonase / galacturan 1,4-alpha-galacturonidase / pectinase | chr3:4648607-4650226 REVERSEhighly similar to ( 806) PGLR3_MAIZE Exopolygalacturonase precursor (EC 3.2.1.67) (ExoPG) (Pectinase) (Galacturan 1,4-alpha-galacturonidase) - Zea mays (Maize)highly similar to ( 619) loc_os06g35370 12006.m08074 protein exopolygalacturonase pre…	0	0	0	0	0	0	0	0	0	0
GRMZM2G162384	'10.6.3'	'cell wall.degradation.pectate lyases and polygalacturonases'	'moderately similar to ( 226) AT3G07820 | Symbols: | polygalacturonase 3 (PGA3) / pectinase | chr3:2496597-2498028 REVERSEmoderately similar to ( 481) PGLR1_MAIZE Exopolygalacturonase precursor (EC 3.2.1.67) (ExoPG) (Pectinase) (Galacturan 1,4-alpha-galacturonidase) - Zea mays (Maize)moderately similar to ( 398) loc_os06g35370 12006.m08074 protein exopolygalacturonase precursor, putative, express…	0	0	0	0	0	0	0	0	0	0
GRMZM2G170388	'10.6.3'	'cell wall.degradation.pectate lyases and polygalacturonases'	'highly similar to ( 507) AT1G02460 | Symbols: | glycoside hydrolase family 28 protein / polygalacturonase (pectinase) family protein | chr1:504897-507099 REVERSEmoderately similar to ( 263) PGLR_ACTCH Polygalacturonase precursor (EC 3.2.1.15) (PG) (Pectinase) - Actinidia chinensis (Kiwi) (Yangtao)highly similar to ( 639) loc_os01g19170 12001.m08454 protein polygalacturonase precursor, putative, …	0	0.8	1.7	0.05	0.3	0	0	0.15	0.1	10.85
GRMZM2G174598	'10.6.3'	'cell wall.degradation.pectate lyases and polygalacturonases'	'highly similar to ( 546) AT4G23820 | Symbols: | glycoside hydrolase family 28 protein / polygalacturonase (pectinase) family protein | chr4:12397217-12400050 REVERSEvery weakly similar to (82.8) PGLR_MALDO Polygalacturonase precursor (EC 3.2.1.15) (PG) (Pectinase) - Malus domestica (Apple) (Malus sylvestris)highly similar to ( 721) loc_os02g15690 12002.m06812 protein polygalacturonase, putative,…	41.95	5.35	11.2	64.25	33.25	51.2	69.25	66.55	36.85	15.45
GRMZM2G174708	'10.6.3'	'cell wall.degradation.pectate lyases and polygalacturonases'	'weakly similar to ( 179) AT5G06870 | Symbols: PGIP2, ATPGIP2 | PGIP2 (POLYGALACTURONASE INHIBITING PROTEIN 2); protein binding | chr5:2133941-2135016 FORWARDweakly similar to ( 181) PGIP2_PHAVU Polygalacturonase inhibitor 2 precursor (Polygalacturonase-inhibiting protein) (PGIP-2) - Phaseolus vulgaris (Kidney bean) (French bean)moderately similar to ( 389) loc_os03g32180 12003.m08463 protein pol…	0	0	0	0	0	0	0.1	0.3	0.1	0
GRMZM2G175698	'10.6.3'	'cell wall.degradation.pectate lyases and polygalacturonases'	'highly similar to ( 553) AT1G09890 | Symbols: | lyase | chr1:3214237-3217386 REVERSEhighly similar to ( 751) loc_os12g03790 12012.m04376 protein lyase, putative, expressed seq=cds; coord=5:111537549..111540965:-1; parent_gene=GRMZM2G175698'	0	0	0	0	0	0	0	0	0	0
GRMZM2G179444	'10.6.3'	'cell wall.degradation.pectate lyases and polygalacturonases'	'moderately similar to ( 287) AT3G48950 | Symbols: | glycoside hydrolase family 28 protein / polygalacturonase (pectinase) family protein | chr3:18148017-18149987 FORWARDmoderately similar to ( 370) loc_os03g03350 12003.m05870 protein glycoside hydrolase, family 28, putative, expressed seq=cds; coord=8:121177893..121180407:-1; parent_gene=GRMZM2G179444'	0	0	0	0	0	0	0	0	0	0
GRMZM2G179696	'10.6.3'	'cell wall.degradation.pectate lyases and polygalacturonases'	'weakly similar to ( 133) AT1G10640 | Symbols: | polygalacturonase | chr1:3515478-3517807 REVERSEmoderately similar to ( 229) loc_os01g44970 12001.m10703 protein polygalacturonase precursor, putative, expressed seq=cds; coord=8:146183315..146186058:1; parent_gene=GRMZM2G179696'	26.65	23.1	29.45	26.3	14.45	20.8	23.3	38.65	12.65	13.45
GRMZM2G301287	'10.6.3'	'cell wall.degradation.pectate lyases and polygalacturonases'	'very weakly similar to (96.3) AT1G67750 | Symbols: | pectate lyase family protein | chr1:25401660-25403165 FORWARDweakly similar to ( 105) loc_os04g05050 12004.m35243 protein pectate lyase 8 precursor, putative, expressed seq=cds; coord=5:156162885..156172864:1; parent_gene=GRMZM2G301287'	0	0	0	0	0	0	0	0	0	0
GRMZM2G306693	'10.6.3'	'cell wall.degradation.pectate lyases and polygalacturonases'	'weakly similar to ( 132) AT1G02790 | Symbols: PGA4 | PGA4 (POLYGALACTURONASE 4); polygalacturonase | chr1:610681-612225 REVERSEmoderately similar to ( 362) PGLR2_MAIZE Exopolygalacturonase precursor (EC 3.2.1.67) (ExoPG) (Pectinase) (Galacturan 1,4-alpha-galacturonidase) - Zea mays (Maize)moderately similar to ( 245) loc_os06g35370 12006.m08074 protein exopolygalacturonase precursor, putative, e…	0	0	0	0	0	0	0	0	0	0
GRMZM2G320175	'10.6.3'	'cell wall.degradation.pectate lyases and polygalacturonases'	'moderately similar to ( 321) AT2G26620 | Symbols: | glycoside hydrolase family 28 protein / polygalacturonase (pectinase) family protein | chr2:11325163-11326835 REVERSEhighly similar to ( 840) PGLR1_MAIZE Exopolygalacturonase precursor (EC 3.2.1.67) (ExoPG) (Pectinase) (Galacturan 1,4-alpha-galacturonidase) - Zea mays (Maize)highly similar to ( 625) loc_os06g35370 12006.m08074 protein exopolyga…	0	0	0	0	0	0	0	0	0	0	polygalacturonase2
GRMZM2G323418	'10.6.3'	'cell wall.degradation.pectate lyases and polygalacturonases'	'moderately similar to ( 444) AT1G14420 | Symbols: AT59 | AT59; lyase/ pectate lyase | chr1:4931844-4933405 REVERSEmoderately similar to ( 493) PEL_LILLO Pectate lyase precursor (EC 4.2.2.2) - Lilium longiflorum (Trumpet lily)highly similar to ( 679) loc_os06g05209 12006.m05250 protein pectate lyase precursor, putative, expressed seq=cds; coord=9:20154595..20156665:1; parent_gene=GRMZM2G323418'	0	0	0	0	0	0	0	0	0	0
GRMZM2G333980	'10.6.3'	'cell wall.degradation.pectate lyases and polygalacturonases'	'moderately similar to ( 229) AT5G06870 | Symbols: PGIP2, ATPGIP2 | PGIP2 (POLYGALACTURONASE INHIBITING PROTEIN 2); protein binding | chr5:2133941-2135016 FORWARDhighly similar to ( 509) PGIP1_ORYSA Polygalacturonase inhibitor 1 precursor (Polygalacturonase-inhibiting protein) (Floral organ regulator 1) - Oryza sativa (Rice)highly similar to ( 509) loc_os07g38130 12007.m08062 protein polygalactur…	0.45	2.05	8.2	3.8	2.2	3.6	7.05	11.3	0.5	4.45
GRMZM2G338158	'10.6.3'	'cell wall.degradation.pectate lyases and polygalacturonases'	'moderately similar to ( 427) AT3G26610 | Symbols: | polygalacturonase, putative / pectinase, putative | chr3:9777025-9780267 FORWARDmoderately similar to ( 251) PGLR_ACTCH Polygalacturonase precursor (EC 3.2.1.15) (PG) (Pectinase) - Actinidia chinensis (Kiwi) (Yangtao)highly similar to ( 555) loc_os01g36830 12001.m09979 protein polygalacturonase precursor, putative seq=cds; coord=8:137040618..13…	0	0	0	0	0	0	0	0	0	0
GRMZM2G348602	'10.6.3'	'cell wall.degradation.pectate lyases and polygalacturonases'	'moderately similar to ( 415) AT1G19170 | Symbols: | glycoside hydrolase family 28 protein / polygalacturonase (pectinase) family protein | chr1:6616777-6618875 FORWARDmoderately similar to ( 410) loc_os02g54030 12002.m10432 protein endo-polygalacturonase precursor, putative, expressed seq=cds; coord=4:158807822..158810136:-1; parent_gene=GRMZM2G348602'	0	0	0	0	0	0	0	0	0	0
GRMZM2G359305	'10.6.3'	'cell wall.degradation.pectate lyases and polygalacturonases'	'very weakly similar to (85.9) AT1G67750 | Symbols: | pectate lyase family protein | chr1:25401660-25403165 FORWARDvery weakly similar to (95.5) loc_os04g05050 12004.m35243 protein pectate lyase 8 precursor, putative, expressed seq=cds; coord=9:122928898..122933487:1; parent_gene=GRMZM2G359305'	0	0	0	0	0	0	0	0	0	0
GRMZM2G364349	'10.6.3'	'cell wall.degradation.pectate lyases and polygalacturonases'	'moderately similar to ( 383) AT1G14420 | Symbols: AT59 | AT59; lyase/ pectate lyase | chr1:4931844-4933405 REVERSEmoderately similar to ( 401) PEL_LILLO Pectate lyase precursor (EC 4.2.2.2) - Lilium longiflorum (Trumpet lily)highly similar to ( 523) loc_os06g05260 12006.m05255 protein pectate lyase precursor, putative, expressed seq=cds; coord=6:72007208..72008992:1; parent_gene=GRMZM2G364349'	0	0	0	0	0	0	0	0	0	0
GRMZM2G366254	'10.6.3'	'cell wall.degradation.pectate lyases and polygalacturonases'	'weakly similar to ( 132) PGLR1_MAIZE Exopolygalacturonase precursor (EC 3.2.1.67) (ExoPG) (Pectinase) (Galacturan 1,4-alpha-galacturonidase) - Zea mays (Maize)weakly similar to ( 115) loc_os06g35370 12006.m08074 protein exopolygalacturonase precursor, putative, expressed seq=cds; coord=6:99501743..99503205:1; parent_gene=GRMZM2G366254'	0	0	0	0	0	0	0	0	0	0
GRMZM2G367110	'10.6.3'	'cell wall.degradation.pectate lyases and polygalacturonases'	'very weakly similar to (88.6) PGLR2_MAIZE Exopolygalacturonase precursor (EC 3.2.1.67) (ExoPG) (Pectinase) (Galacturan 1,4-alpha-galacturonidase) - Zea mays (Maize)very weakly similar to ( 100) loc_os02g10300 12002.m06328 protein exopolygalacturonase precursor, putative, expressed seq=cds; coord=5:121010482..121012111:-1; parent_gene=GRMZM2G367110'	0	0	0	0	0	0	0	0	0	0
GRMZM2G374375	'10.6.3'	'cell wall.degradation.pectate lyases and polygalacturonases'	'moderately similar to ( 322) AT3G07820 | Symbols: | polygalacturonase 3 (PGA3) / pectinase | chr3:2496597-2498028 REVERSEmoderately similar to ( 480) PGLR3_MAIZE Exopolygalacturonase precursor (EC 3.2.1.67) (ExoPG) (Pectinase) (Galacturan 1,4-alpha-galacturonidase) - Zea mays (Maize)highly similar to ( 621) loc_os02g10300 12002.m06328 protein exopolygalacturonase precursor, putative, expressed s…	0	0	0	0	0	0	0	0	0	0
GRMZM2G386171	'10.6.3'	'cell wall.degradation.pectate lyases and polygalacturonases'	'moderately similar to ( 221) AT5G48140 | Symbols: | polygalacturonase, putative / pectinase, putative | chr5:19518907-19520412 REVERSEmoderately similar to ( 432) PGLR3_MAIZE Exopolygalacturonase precursor (EC 3.2.1.67) (ExoPG) (Pectinase) (Galacturan 1,4-alpha-galacturonidase) - Zea mays (Maize)moderately similar to ( 420) loc_os06g35370 12006.m08074 protein exopolygalacturonase precursor, puta…	0	0	0	0	0	0	0	0	0	0
GRMZM2G394259	'10.6.3'	'cell wall.degradation.pectate lyases and polygalacturonases'	'moderately similar to ( 322) AT2G26620 | Symbols: | glycoside hydrolase family 28 protein / polygalacturonase (pectinase) family protein | chr2:11325163-11326835 REVERSEhighly similar to ( 838) PGLR2_MAIZE Exopolygalacturonase precursor (EC 3.2.1.67) (ExoPG) (Pectinase) (Galacturan 1,4-alpha-galacturonidase) - Zea mays (Maize)highly similar to ( 626) loc_os06g35370 12006.m08074 protein exopolyga…	0	0	0	0	0	0	0	0	0	0	exopolygalacturonase8
GRMZM2G399421	'10.6.3'	'cell wall.degradation.pectate lyases and polygalacturonases'	'moderately similar to ( 356) AT4G18180 | Symbols: | glycoside hydrolase family 28 protein / polygalacturonase (pectinase) family protein | chr4:10065626-10067317 FORWARDmoderately similar to ( 302) PGLR3_MAIZE Exopolygalacturonase precursor (EC 3.2.1.67) (ExoPG) (Pectinase) (Galacturan 1,4-alpha-galacturonidase) - Zea mays (Maize)highly similar to ( 591) loc_os08g23790 12008.m06399 protein exopo…	0	0	0	0	0	0	0	0	0	0
GRMZM2G406170	'10.6.3'	'cell wall.degradation.pectate lyases and polygalacturonases'	'weakly similar to ( 103) AT5G25610 | Symbols: RD22 | RD22; nutrient reservoir | chr5:8914498-8916684 REVERSEmoderately similar to ( 202) loc_os02g18690 12002.m07112 protein BURP domain containing protein, expressed seq=cds; coord=7:6356093..6357279:1; parent_gene=GRMZM2G406170'	0.1	0	0.15	0	0.1	0.05	0.1	0.1	0.1	0.15
GRMZM2G412207	'10.6.3'	'cell wall.degradation.pectate lyases and polygalacturonases'	'moderately similar to ( 226) AT4G13710 | Symbols: | pectate lyase family protein | chr4:7962550-7966012 FORWARDweakly similar to ( 164) PEL_LILLO Pectate lyase precursor (EC 4.2.2.2) - Lilium longiflorum (Trumpet lily)moderately similar to ( 252) loc_os04g05050 12004.m35243 protein pectate lyase 8 precursor, putative, expressed seq=cds; coord=10:101889767..101891354:-1; parent_gene=GRMZM2G412207'	4.3	14.5	5.5	6.05	3.9	8.65	13	6.5	1.9	81.6
GRMZM2G418644	'10.6.3'	'cell wall.degradation.pectate lyases and polygalacturonases'	'moderately similar to ( 321) AT2G26620 | Symbols: | glycoside hydrolase family 28 protein / polygalacturonase (pectinase) family protein | chr2:11325163-11326835 REVERSEhighly similar to ( 840) PGLR1_MAIZE Exopolygalacturonase precursor (EC 3.2.1.67) (ExoPG) (Pectinase) (Galacturan 1,4-alpha-galacturonidase) - Zea mays (Maize)highly similar to ( 625) loc_os06g35370 12006.m08074 protein exopolyga…	0	0	0	0	0	0	0	0	0	0
GRMZM2G435380	'10.6.3'	'cell wall.degradation.pectate lyases and polygalacturonases'	'moderately similar to ( 366) AT5G14650 | Symbols: | polygalacturonase, putative / pectinase, putative | chr5:4724509-4726328 FORWARDmoderately similar to ( 212) PGLR_ACTCH Polygalacturonase precursor (EC 3.2.1.15) (PG) (Pectinase) - Actinidia chinensis (Kiwi) (Yangtao)moderately similar to ( 484) loc_os06g28670 12006.m07411 protein polygalacturonase precursor, putative seq=cds; coord=9:49132685.…	0	0	0	0	0	0	0	0	0.05	0
GRMZM2G446170	'10.6.3'	'cell wall.degradation.pectate lyases and polygalacturonases'	'moderately similar to ( 254) AT5G25610 | Symbols: RD22 | RD22; nutrient reservoir | chr5:8914498-8916684 REVERSEweakly similar to ( 110) EA30_VICFA Embryonic abundant protein VF30.1 precursor - Vicia faba (Broad bean)moderately similar to ( 388) loc_os01g53240 12001.m11493 protein dehydration-induced protein RD22-like protein 2, putative, expressed seq=cds; coord=8:175731989..175734254:-1; paren…	2.2	7.55	17.3	4.75	3.8	2.75	10.8	23.4	3.85	6
GRMZM2G450771	'10.6.3'	'cell wall.degradation.pectate lyases and polygalacturonases'	'highly similar to ( 580) AT1G09880 | Symbols: | lyase | chr1:3208828-3211653 REVERSEhighly similar to ( 773) loc_os12g03790 12012.m04376 protein lyase, putative, expressed seq=cds; coord=4:186142723..186147554:1; parent_gene=GRMZM2G450771'	0	0	0	0	0	0	0	0.05	0	0
GRMZM2G452150	'10.6.3'	'cell wall.degradation.pectate lyases and polygalacturonases'	'moderately similar to ( 355) AT4G18180 | Symbols: | glycoside hydrolase family 28 protein / polygalacturonase (pectinase) family protein | chr4:10065626-10067317 FORWARDmoderately similar to ( 302) PGLR3_MAIZE Exopolygalacturonase precursor (EC 3.2.1.67) (ExoPG) (Pectinase) (Galacturan 1,4-alpha-galacturonidase) - Zea mays (Maize)highly similar to ( 598) loc_os08g23790 12008.m06399 protein exopo…	0	0	0	0	0	0	0	0	0	0
GRMZM2G454497	'10.6.3'	'cell wall.degradation.pectate lyases and polygalacturonases'	'moderately similar to ( 233) AT3G07840 | Symbols: | polygalacturonase, putative / pectinase, putative | chr3:2501893-2503475 REVERSEhighly similar to ( 502) PGLR1_MAIZE Exopolygalacturonase precursor (EC 3.2.1.67) (ExoPG) (Pectinase) (Galacturan 1,4-alpha-galacturonidase) - Zea mays (Maize)moderately similar to ( 412) loc_os06g35370 12006.m08074 protein exopolygalacturonase precursor, putative, …	0	0	0	0	0	0	0	0	0	0
GRMZM2G454608	'10.6.3'	'cell wall.degradation.pectate lyases and polygalacturonases'	'moderately similar to ( 321) AT2G26620 | Symbols: | glycoside hydrolase family 28 protein / polygalacturonase (pectinase) family protein | chr2:11325163-11326835 REVERSEhighly similar to ( 840) PGLR1_MAIZE Exopolygalacturonase precursor (EC 3.2.1.67) (ExoPG) (Pectinase) (Galacturan 1,4-alpha-galacturonidase) - Zea mays (Maize)highly similar to ( 625) loc_os06g35370 12006.m08074 protein exopolyga…	0	0	0	0	0	0	0	0	0	0
GRMZM2G467435	'10.6.3'	'cell wall.degradation.pectate lyases and polygalacturonases'	'highly similar to ( 503) AT1G48100 | Symbols: | glycoside hydrolase family 28 protein / polygalacturonase (pectinase) family protein | chr1:17766921-17769625 FORWARDmoderately similar to ( 257) PGLR_ACTCH Polygalacturonase precursor (EC 3.2.1.15) (PG) (Pectinase) - Actinidia chinensis (Kiwi) (Yangtao)highly similar to ( 603) loc_os01g22590 12001.m08738 protein polygalacturonase, putative, expres…	10.95	3.6	5.95	17.25	7.05	4.75	11.5	18.95	5.15	5
GRMZM2G472060	'10.6.3'	'cell wall.degradation.pectate lyases and polygalacturonases'	'moderately similar to ( 493) AT3G53190 | Symbols: | pectate lyase family protein | chr3:19714171-19717537 FORWARDmoderately similar to ( 358) PEL_LILLO Pectate lyase precursor (EC 4.2.2.2) - Lilium longiflorum (Trumpet lily)highly similar to ( 667) loc_os10g31910 12010.m06042 protein pectate lyase 12 precursor, putative, expressed seq=cds; coord=1:235441033..235444718:1; parent_gene=GRMZM2G47206…	26.4	21.65	19.7	29.1	21	21.45	19.75	18	26	19.3
GRMZM5G800586	'10.6.3'	'cell wall.degradation.pectate lyases and polygalacturonases'	'moderately similar to ( 260) AT5G25610 | Symbols: RD22 | RD22; nutrient reservoir | chr5:8914498-8916684 REVERSEweakly similar to ( 106) EA30_VICFA Embryonic abundant protein VF30.1 precursor - Vicia faba (Broad bean)moderately similar to ( 404) loc_os01g53240 12001.m11493 protein dehydration-induced protein RD22-like protein 2, putative, expressed seq=cds; coord=3:200431764..200433851:-1; paren…	0	0.1	0.3	0	0	0	0	0.15	0.05	0
GRMZM5G814803	'10.6.3'	'cell wall.degradation.pectate lyases and polygalacturonases'	'weakly similar to ( 144) AT2G43870 | Symbols: | polygalacturonase, putative / pectinase, putative | chr2:18166615-18168264 REVERSEweakly similar to ( 133) PGLR_PRUPE Polygalacturonase precursor (EC 3.2.1.15) (PG) (Pectinase) - Prunus persica (Peach)weakly similar to ( 194) loc_os01g43490 12001.m10611 protein polygalacturonase precursor, putative, expressed seq=cds; coord=3:217584526..217585364:-…	0	0	0	0	0	0	0	0	0	0
GRMZM5G831200	'10.6.3'	'cell wall.degradation.pectate lyases and polygalacturonases'	'moderately similar to ( 458) AT1G23460 | Symbols: | polygalacturonase | chr1:8327382-8329622 FORWARDmoderately similar to ( 321) PGLR_ACTCH Polygalacturonase precursor (EC 3.2.1.15) (PG) (Pectinase) - Actinidia chinensis (Kiwi) (Yangtao)highly similar to ( 617) loc_os02g03750 12002.m05724 protein polygalacturonase precursor, putative, expressed seq=cds; coord=5:74450298..74452700:-1; parent_gene…	0.1	0.95	1.7	0.45	0.85	0.4	0.4	0.75	0.25	17.5
GRMZM5G860318	'10.6.3'	'cell wall.degradation.pectate lyases and polygalacturonases'	'moderately similar to ( 426) AT5G15110 | Symbols: | lyase/ pectate lyase | chr5:4895966-4897682 FORWARDmoderately similar to ( 482) PEL_LILLO Pectate lyase precursor (EC 4.2.2.2) - Lilium longiflorum (Trumpet lily)highly similar to ( 652) loc_os06g38510 12006.m091725 protein pectate lyase precursor, putative, expressed seq=cds; coord=9:83486024..83487690:-1; parent_gene=GRMZM5G860318'	0	0	0	0	0	0	0	0	0	0
GRMZM5G882418	'10.6.3'	'cell wall.degradation.pectate lyases and polygalacturonases'	'moderately similar to ( 246) AT3G62110 | Symbols: | glycoside hydrolase family 28 protein / polygalacturonase (pectinase) family protein | chr3:22997313-22999503 REVERSEmoderately similar to ( 406) loc_os03g61800 12003.m35505 protein polygalacturonase, putative, expressed seq=cds; coord=1:295308871..295310251:-1; parent_gene=GRMZM5G882418'	37.85	43	45.35	49.35	40.95	40.2	46.2	54.05	41.05	80.1
GRMZM2G005643	'10.7'	'cell wall.modification'	'weakly similar to ( 117) loc_os04g25150 12004.m07645 protein pollen allergen Phl p 2 precursor, putative, expressed seq=cds; coord=6:157368796..157369949:1; parent_gene=GRMZM2G005643'	0	0	0	0	0	0	0	0	0	0
GRMZM2G007708	'10.7'	'cell wall.modification'	'weakly similar to ( 106) loc_os06g45230 12006.m09050 protein pollen allergen Phl p 2 precursor, putative, expressed seq=cds; coord=6:157349767..157350512:1; parent_gene=GRMZM2G007708'	0	0	0	0	0	0	0	0	0	0
GRMZM2G053749	'10.7'	'cell wall.modification'	'very weakly similar to (99.0) loc_os06g45230 12006.m09050 protein pollen allergen Phl p 2 precursor, putative, expressed seq=cds; coord=4:45434088..45434796:1; parent_gene=GRMZM2G053749'	0	0	0	0	0	0	0	0	0	0
GRMZM2G060937	'10.7'	'cell wall.modification'	'weakly similar to ( 115) loc_os04g26230 12004.m07749 protein pollen allergen Phl p 2 precursor, putative, expressed seq=cds; coord=4:45351030..45351807:1; parent_gene=GRMZM2G060937'	0	0	0	0	0	0	0	0	0	0
GRMZM2G079574	'10.7'	'cell wall.modification'	'weakly similar to ( 123) loc_os06g44470 12006.m08975 protein pollen allergen Phl p 2 precursor, putative, expressed seq=cds; coord=3:232040060..232040866:1; parent_gene=GRMZM2G079574'	0.1	0.55	0.3	0.1	0.05	0	0	0	0	0
GRMZM2G121631	'10.7'	'cell wall.modification'	'weakly similar to ( 105) loc_os06g45230 12006.m09050 protein pollen allergen Phl p 2 precursor, putative, expressed seq=cds; coord=4:45458320..45459292:1; parent_gene=GRMZM2G121631'	0	0	0	0	0	0	0	0	0	0
GRMZM2G139431	'10.7'	'cell wall.modification'	'weakly similar to ( 114) loc_os04g26230 12004.m07749 protein pollen allergen Phl p 2 precursor, putative, expressed seq=cds; coord=4:45483359..45484041:1; parent_gene=GRMZM2G139431'	0	0	0	0	0	0	0	0	0	0
GRMZM2G139513	'10.7'	'cell wall.modification'	'weakly similar to ( 115) loc_os04g26230 12004.m07749 protein pollen allergen Phl p 2 precursor, putative, expressed seq=cds; coord=4:45542662..45543417:1; parent_gene=GRMZM2G139513'	0	0	0	0	0	0	0	0	0	0
GRMZM2G139517	'10.7'	'cell wall.modification'	'weakly similar to ( 114) loc_os04g26230 12004.m07749 protein pollen allergen Phl p 2 precursor, putative, expressed seq=cds; coord=4:45567002..45567722:1; parent_gene=GRMZM2G139517'	0	0	0	0	0	0	0	0	0	0
AC210669.3_FG001	'10.7.1'	'cell wall.modification.Xyloglucan related'	'moderately similar to ( 333) AT5G57560 | Symbols: TCH4, XTH22 | TCH4 (Touch 4); hydrolase, acting on glycosyl bonds / xyloglucan:xyloglucosyl transferase | chr5:23307296-23308235 REVERSEmoderately similar to ( 300) BRU1_SOYBN Brassinosteroid-regulated protein BRU1 precursor - Glycine max (Soybean)moderately similar to ( 424) loc_os06g48160 12006.m09342 protein xyloglucan endotransglucosylase/hyd…	0.55	0.45	1.15	0.35	0.65	0.2	0.45	0.9	0.25	0.2
GRMZM2G004699	'10.7.1'	'cell wall.modification.Xyloglucan related'	'moderately similar to ( 464) AT5G13870 | Symbols: EXGT-A4 | EXGT-A4 (ENDOXYLOGLUCAN TRANSFERASE A4); hydrolase, acting on glycosyl bonds / hydrolase, hydrolyzing O-glycosyl compounds / xyloglucan:xyloglucosyl transferase | chr5:4475089-4476217 REVERSEhighly similar to ( 530) XTH_WHEAT Probable xyloglucan endotransglucosylase/hydrolase precursor (EC 2.4.1.207) - Triticum aestivum (Wheat)highly si…	48.7	29.55	93	71.75	144.15	230	288.4	256.4	164.4	106.05
GRMZM2G026980	'10.7.1'	'cell wall.modification.Xyloglucan related'	'moderately similar to ( 353) AT4G25810 | Symbols: XTR6, XTH23 | XTR6 (XYLOGLUCAN ENDOTRANSGLYCOSYLASE 6); hydrolase, acting on glycosyl bonds / hydrolase, hydrolyzing O-glycosyl compounds / xyloglucan:xyloglucosyl transferase | chr4:13128694-13129715 FORWARDmoderately similar to ( 323) BRU1_SOYBN Brassinosteroid-regulated protein BRU1 precursor - Glycine max (Soybean)moderately similar to ( 422)…	0	0	0	0	0	0	0	0	0	0
GRMZM2G030173	'10.7.1'	'cell wall.modification.Xyloglucan related'	'very weakly similar to (95.9) AT2G06850 | Symbols: EXGT-A1, EXT | EXGT-A1 (ENDOXYLOGLUCAN TRANSFERASE); hydrolase, acting on glycosyl bonds / xyloglucan:xyloglucosyl transferase | chr2:2763619-2765490 FORWARDvery weakly similar to (85.9) XTH_TOBAC Probable xyloglucan endotransglucosylase/hydrolase protein precursor (EC 2.4.1.207) - Nicotiana tabacum (Common tobacco)moderately similar to ( 372) l…	6.65	3	7.7	9.75	5.9	8.75	11.35	10.35	4.95	8.75
GRMZM2G039919	'10.7.1'	'cell wall.modification.Xyloglucan related'	'moderately similar to ( 240) AT1G14720 | Symbols: XTR2, EXGT-A2, ATXTH28 | XTR2 (XYLOGLUCAN ENDOTRANSGLYCOSYLASE RELATED 2); hydrolase, acting on glycosyl bonds / xyloglucan:xyloglucosyl transferase | chr1:5066806-5068466 REVERSEweakly similar to ( 134) XTH_WHEAT Probable xyloglucan endotransglucosylase/hydrolase precursor (EC 2.4.1.207) - Triticum aestivum (Wheat)moderately similar to ( 317) lo…	10.35	13.2	18.2	15.1	8.7	7.2	11.3	14	12.1	20.4
GRMZM2G060837	'10.7.1'	'cell wall.modification.Xyloglucan related'	'moderately similar to ( 231) AT1G32170 | Symbols: XTR4, XTH30 | XTR4 (XYLOGLUCAN ENDOTRANSGLYCOSYLASE 4); hydrolase, acting on glycosyl bonds / hydrolase, hydrolyzing O-glycosyl compounds / xyloglucan:xyloglucosyl transferase | chr1:11575434-11577776 FORWARDweakly similar to ( 118) XTH_WHEAT Probable xyloglucan endotransglucosylase/hydrolase precursor (EC 2.4.1.207) - Triticum aestivum (Wheat)mo…	8.25	4.7	10.65	12.6	14.45	14.65	15.95	14.75	15.5	28.3
GRMZM2G062811	'10.7.1'	'cell wall.modification.Xyloglucan related'	'moderately similar to ( 234) AT4G14130 | Symbols: XTR7 | XTR7 (XYLOGLUCAN ENDOTRANSGLYCOSYLASE 7); hydrolase, acting on glycosyl bonds / hydrolase, hydrolyzing O-glycosyl compounds / xyloglucan:xyloglucosyl transferase | chr4:8137161-8138196 REVERSEmoderately similar to ( 241) BRU1_SOYBN Brassinosteroid-regulated protein BRU1 precursor - Glycine max (Soybean)moderately similar to ( 350) loc_os08…	0	0	0	0	0	0	0	0	0	0
GRMZM2G063566	'10.7.1'	'cell wall.modification.Xyloglucan related'	'weakly similar to ( 186) AT4G25820 | Symbols: XTR9 | XTR9 (XYLOGLUCAN ENDOTRANSGLYCOSYLASE 9); hydrolase, acting on glycosyl bonds / hydrolase, hydrolyzing O-glycosyl compounds / xyloglucan:xyloglucosyl transferase | chr4:13130349-13131615 FORWARDmoderately similar to ( 276) XTH8_ORYSA Xyloglucan endotransglycosylase/hydrolase protein 8 precursor (EC 2.4.1.207) (End-xyloglucan transferase) (OsXT…	0	0.1	1.35	0.55	0.1	0	0	0.05	0	1.4
GRMZM2G070271	'10.7.1'	'cell wall.modification.Xyloglucan related'	'moderately similar to ( 278) AT4G18990 | Symbols: | xyloglucan:xyloglucosyl transferase, putative / xyloglucan endotransglycosylase, putative / endo-xyloglucan transferase, putative | chr4:10401941-10404248 REVERSEweakly similar to ( 154) XTH_WHEAT Probable xyloglucan endotransglucosylase/hydrolase precursor (EC 2.4.1.207) - Triticum aestivum (Wheat)moderately similar to ( 381) loc_os10g42670 12…	0	0	0	0	0	0	0	0	0	0
GRMZM2G076157	'10.7.1'	'cell wall.modification.Xyloglucan related'	'moderately similar to ( 280) AT5G57550 | Symbols: XTR3 | XTR3 (XYLOGLUCAN ENDOTRANSGLYCOSYLASE 3); hydrolase, acting on glycosyl bonds / xyloglucan:xyloglucosyl transferase | chr5:23305055-23306384 REVERSEmoderately similar to ( 255) BRU1_SOYBN Brassinosteroid-regulated protein BRU1 precursor - Glycine max (Soybean)moderately similar to ( 466) loc_os08g14210 12008.m05546 protein xyloglucan endot…	0	0	0	0	0	0	0	0	0	0
GRMZM2G091118	'10.7.1'	'cell wall.modification.Xyloglucan related'	'moderately similar to ( 258) AT3G23730 | Symbols: | xyloglucan:xyloglucosyl transferase, putative / xyloglucan endotransglycosylase, putative / endo-xyloglucan transferase, putative | chr3:8550222-8551248 FORWARDmoderately similar to ( 250) BRU1_SOYBN Brassinosteroid-regulated protein BRU1 precursor - Glycine max (Soybean)moderately similar to ( 332) loc_os08g13980 12008.m05523 protein xylogluca…	0	0	0	0	0	0	0	0	0	0
GRMZM2G091191	'10.7.1'	'cell wall.modification.Xyloglucan related'	'moderately similar to ( 278) AT5G57550 | Symbols: XTR3 | XTR3 (XYLOGLUCAN ENDOTRANSGLYCOSYLASE 3); hydrolase, acting on glycosyl bonds / xyloglucan:xyloglucosyl transferase | chr5:23305055-23306384 REVERSEmoderately similar to ( 275) BRU1_SOYBN Brassinosteroid-regulated protein BRU1 precursor - Glycine max (Soybean)moderately similar to ( 425) loc_os04g51450 12004.m10041 protein brassinosteroid-…	0.8	0.6	1.05	0.65	0.2	0.1	0	0	0.35	0.1
GRMZM2G091303	'10.7.1'	'cell wall.modification.Xyloglucan related'	'moderately similar to ( 254) AT3G23730 | Symbols: | xyloglucan:xyloglucosyl transferase, putative / xyloglucan endotransglycosylase, putative / endo-xyloglucan transferase, putative | chr3:8550222-8551248 FORWARDmoderately similar to ( 246) BRU1_SOYBN Brassinosteroid-regulated protein BRU1 precursor - Glycine max (Soybean)moderately similar to ( 327) loc_os08g13980 12008.m05523 protein xylogluca…	0	0	0	0	0	0	0	0	0	0
GRMZM2G104651	'10.7.1'	'cell wall.modification.Xyloglucan related'	'moderately similar to ( 263) AT5G57550 | Symbols: XTR3 | XTR3 (XYLOGLUCAN ENDOTRANSGLYCOSYLASE 3); hydrolase, acting on glycosyl bonds / xyloglucan:xyloglucosyl transferase | chr5:23305055-23306384 REVERSEmoderately similar to ( 253) BRU1_SOYBN Brassinosteroid-regulated protein BRU1 precursor - Glycine max (Soybean)moderately similar to ( 402) loc_os08g14200 12008.m05545 protein xyloglucan endot…	0	0.1	0	0.1	0	0	0	0	0	0
GRMZM2G110299	'10.7.1'	'cell wall.modification.Xyloglucan related'	'moderately similar to ( 276) AT3G25050 | Symbols: XTH3 | XTH3 (XYLOGLUCAN ENDOTRANSGLUCOSYLASE/HYDROLASE 3); hydrolase, acting on glycosyl bonds / xyloglucan:xyloglucosyl transferase | chr3:9126872-9128218 FORWARDmoderately similar to ( 241) XTH_WHEAT Probable xyloglucan endotransglucosylase/hydrolase precursor (EC 2.4.1.207) - Triticum aestivum (Wheat)moderately similar to ( 355) loc_os06g13040…	0	0	0	0	0	0	0	0	0	0
GRMZM2G112190	'10.7.1'	'cell wall.modification.Xyloglucan related'	'very weakly similar to (97.1) AT1G32170 | Symbols: XTR4, XTH30 | XTR4 (XYLOGLUCAN ENDOTRANSGLYCOSYLASE 4); hydrolase, acting on glycosyl bonds / hydrolase, hydrolyzing O-glycosyl compounds / xyloglucan:xyloglucosyl transferase | chr1:11575434-11577776 FORWARDweakly similar to ( 183) loc_os02g46910 12002.m100051 protein xyloglucan endotransglucosylase/hydrolase protein 30 precursor, putative, exp…	0	0	0	0	0	0	0	0	0	0
GRMZM2G112198	'10.7.1'	'cell wall.modification.Xyloglucan related'	'moderately similar to ( 278) AT1G14720 | Symbols: XTR2, EXGT-A2, ATXTH28 | XTR2 (XYLOGLUCAN ENDOTRANSGLYCOSYLASE RELATED 2); hydrolase, acting on glycosyl bonds / xyloglucan:xyloglucosyl transferase | chr1:5066806-5068466 REVERSEweakly similar to ( 146) XTH_WHEAT Probable xyloglucan endotransglucosylase/hydrolase precursor (EC 2.4.1.207) - Triticum aestivum (Wheat)moderately similar to ( 438) lo…	0.1	0.1	0.25	0.2	0.45	0.3	0.25	0.3	0.4	0.1
GRMZM2G112619	'10.7.1'	'cell wall.modification.Xyloglucan related'	'moderately similar to ( 260) AT4G28850 | Symbols: | xyloglucan:xyloglucosyl transferase, putative / xyloglucan endotransglycosylase, putative / endo-xyloglucan transferase, putative | chr4:14244336-14245781 FORWARDmoderately similar to ( 236) BRU1_SOYBN Brassinosteroid-regulated protein BRU1 precursor - Glycine max (Soybean)moderately similar to ( 421) loc_os02g17900 12002.m07034 protein xyloglu…	0	0	0	0	0	0	0	0	0	0
GRMZM2G113761	'10.7.1'	'cell wall.modification.Xyloglucan related'	'moderately similar to ( 362) AT3G44990 | Symbols: XTR8, ATXTR8 | XTR8 (XYLOGLUCAN ENDO-TRANSGLYCOSYLASE-RELATED 8); hydrolase, acting on glycosyl bonds / xyloglucan:xyloglucosyl transferase | chr3:16447280-16448678 REVERSEweakly similar to ( 191) XTH_WHEAT Probable xyloglucan endotransglucosylase/hydrolase precursor (EC 2.4.1.207) - Triticum aestivum (Wheat)moderately similar to ( 473) loc_os10g…	0.5	1.15	6.8	0.05	0.45	0.15	0.25	0.2	0.15	0.95
GRMZM2G118579	'10.7.1'	'cell wall.modification.Xyloglucan related'	'moderately similar to ( 332) AT2G36870 | Symbols: | xyloglucan:xyloglucosyl transferase, putative / xyloglucan endotransglycosylase, putative / endo-xyloglucan transferase, putative | chr2:15472869-15474630 REVERSEweakly similar to ( 172) XTH_TOBAC Probable xyloglucan endotransglucosylase/hydrolase protein precursor (EC 2.4.1.207) - Nicotiana tabacum (Common tobacco)moderately similar to ( 365) …	1.85	1.15	4.95	2.95	2.3	1.3	2.4	5.45	4.25	1.9
GRMZM2G119783	'10.7.1'	'cell wall.modification.Xyloglucan related'	'moderately similar to ( 252) AT5G57560 | Symbols: TCH4, XTH22 | TCH4 (Touch 4); hydrolase, acting on glycosyl bonds / xyloglucan:xyloglucosyl transferase | chr5:23307296-23308235 REVERSEmoderately similar to ( 352) XTH8_ORYSA Xyloglucan endotransglycosylase/hydrolase protein 8 precursor (EC 2.4.1.207) (End-xyloglucan transferase) (OsXTH8) (OsXRT5) - Oryza sativa (Rice)moderately similar to ( 352…	0.05	0	0.15	0.1	0.2	0.05	0.1	0	0	1.35
[truncated: 39,106 more rows]

## Sheet: (S3)Shannon entropy
Shannon entropy scores of all expressed genes
				Transformed RPM
[truncated: 19,279 more rows]

## Sheet: (S4)Enrichment SE
Enriched/Depleted MapMan categories among cell type specific genes compared to all expressed genes
[truncated: 1,154 more rows]

## Sheet: (S5)DEGs
Differentially expressed genes in pair-wise comparisons (cut-off: q value < 0.01)
[truncated: 1,879 more rows]

[truncated: 11 more sheets: (S6)Enrichment DEGs, (S7)CAST clustering, (S8)Maize_A.thaliana comparison, (S9)PCA, (S10)Motif enrichment, (S11)Motifs present, (S12)Enrichment KN1 targets, (S13)KN1 targets, (S14)TAS, (S15)Gene_IDs, Supplemental references]
